# Supplementary material for: Mechanistic understanding of domino cyclization between gem-dialkylthio vinylallenes and benzylamine towards economic synthesis: a computational study
Source: Royal Society of Chemistry journal article supplement (doi:10.1039/c3gc42259c), 2014-01-01
Supplement: c3gc42259c1.pdf [file c3gc42259c1.pdf]

## Supporting Information

# Mechanistic Understanding of Domino Cyclization between Gem-Dialkylthio Vinylallenes and Benzylamine towards Economic Synthesis: A Computational Study

Haiyan Yuan, Yiying Zheng, Zhongxue Fang, Xihe Bi, and Jingping Zhang\*

Faculty of Chemistry, Northeast Normal University, Changchun 130024, China

[jpzhang@nenu.edu.cn](mailto:jpzhang@nenu.edu.cn)

### Table of Contents

1. **Table S1.** Relative energies of the BnNH<sub>2</sub> attack carbonyl carbon of **Re'** for the domino cyclization of pyrroles with various methods, calculating with 6-31G\*\* basis set in the gas phase,  $\Delta E$  ( $\Delta G$ ) values are in kcal/mol. S2
2. **Table S2.** Energy and free energy of intermediates and transition states of the trace water-catalyzed the BnNH<sub>2</sub> attack carbonyl carbon of **Re'** at the B3LYP (PBE1PBE)/6-311+G\*\* level,  $\Delta E$  ( $\Delta G$ ) values are in kcal/mol. S2-S3
3. **Figure S1.** DFT computed energy surface for the DMSO-catalyzed domino reaction of pyrroles in the solvent phase, relative energies and free energies are given in kcal/mol. S4
4. **Figure S2.** Structures of the DMSO-assisted domino cyclization of pyrroles, bond distances are in Å. S5-S6
5. **Figure S3.** DFT computed energy surface for the water-catalyzed domino reaction of pyrroles and the corresponding geometry structures of reactants, intermediates, and transition states for pathways 1W' and 2W'. Distances are in Å and relative energies and free energies are given in kcal/mol. S7
6. **Figure S4.** Structures of pathways 1W and 2W for the domino cyclization of pyrroles under trace water-catalyzed condition, bond distances are in Å. S8
7. The effect of water cluster on the keto-enol tautomerization step. S9
8. **Table S3.** Single water and two water molecules catalyzed deprotonation of the nitrogen of BnNH<sub>2</sub> in the mechanism of BnNH<sub>2</sub> attack the allenic carbon of **Re**,  $\Delta\Delta E^\ddagger$  ( $\Delta\Delta G^\ddagger$ ) values are in kcal/mol. S9
9. **Table S4.** Single water, two water molecules and three water cluster catalyzed the [1,3]-H shift processes in the domino cyclization of pyrroles,  $\Delta\Delta E^\ddagger$  ( $\Delta\Delta G^\ddagger$ ) values are in kcal/mol. S9
10. **Figure S5.** The potential energy surface scans for N2-H4 bond from **Int5F** to **Int4F**. S9
11. **Table S5.** Solvent Effects on the trace water-catalyzed mechanism of BnNH<sub>2</sub> attack to the carbonyl carbon of **Re'** for pathway 1W' at the PBE1PBE/6-311+G\*\* level,  $\Delta E$  ( $\Delta G$ ) values are in kcal/mol. S10
12. **Figure S6.** DFT computed energy profile of nucleophilic addition catalyzed by water-DMSO in solvent and the corresponding optimized structures, values and distances are in kcal/mol and Å. S11
13. The PBE1PBE/6-31G\*\* optimized coordinates for the formation of pyrroles. S11-S184

**Table S1.** Relative energies of the BnNH<sub>2</sub> attack carbonyl carbon of **Re'** for the domino cyclization of pyrroles with various methods, calculating with 6-31G\*\* basis set in the gas phase,  $\Delta E$  ( $\Delta G$ ) values are in kcal/mol.

|                                             | B3LYP   | PBE1PBE |
|---------------------------------------------|---------|---------|
| <b>Re'+BnNH<sub>2</sub>+2H<sub>2</sub>O</b> | 0.0     | 0.0     |
| <b>Com1W'</b>                               | -22.0   | -23.5   |
|                                             | (-13.7) | (-12.8) |
| <b>TS1W'</b>                                | -10.0   | -18.9   |
|                                             | (8.2)   | (-1.3)  |
| <b>Int1W'</b>                               | -18.8   | -27.7   |
|                                             | (-4.0)  | (-11.3) |
| <b>TS2W'</b>                                | 4.5     | -8.7    |
|                                             | (20.0)  | (8.3)   |
| <b>Int2W'</b>                               | 1.4     | -14.3   |
|                                             | (17.2)  | (3.1)   |
| <b>TS3W'</b>                                | -0.4    | -16.1   |
|                                             | (15.3)  | (1.8)   |
| <b>Int3W'</b>                               | -46.1   | -61.5   |
|                                             | (-30.5) | (-44.3) |
| <b>TS4W'</b>                                | -31.4   | -42.0   |
|                                             | (-16.3) | (-25.0) |
| <b>Int4W'</b>                               | -64.3   | -75.7   |
|                                             | (-52.8) | (-62.0) |

We employed the most favored mechanism of the BnNH<sub>2</sub> attacking to the carbonyl carbon of **Re'** of the formation of pyrroles to investigate the effect of the various methods on this mechanism, as shown in Table S1. The calculated results indicate PBE1PBE functional qualitatively gives the same prediction with the B3LYP method, and the  $\Delta E$  and  $\Delta G$  values of the rate-determining step **TS2W'** for PBE1PBE are 13.2 kcal/mol and 11.7 kcal/mol lower than that for B3LYP method.

**Table S2.** Energy and free energy of intermediates and transition states of the trace water-catalyzed the BnNH<sub>2</sub> attack carbonyl carbon of **Re'** at the B3LYP (PBE1PBE)/6-311+G\*\* level,  $\Delta E$  ( $\Delta G$ ) values are in kcal/mol.

|                                             | B3LYP  | PBE1PBE |
|---------------------------------------------|--------|---------|
| <b>Re'+BnNH<sub>2</sub>+2H<sub>2</sub>O</b> | 0.0    | 0.0     |
| <b>Com1W'</b>                               | -11.4  | -15.2   |
|                                             | (-1.7) | (-4.3)  |
| <b>TS1W'</b>                                | 5.3    | -6.6    |
|                                             | (22.5) | (11.2)  |
| <b>Int1W'</b>                               | -4.1   | -15.9   |
|                                             | (12.0) | (0.8)   |
| <b>TS2W'</b>                                | 19.6   | 3.2     |
|                                             | (36.1) | (20.3)  |

|               |                  |                  |
|---------------|------------------|------------------|
| <b>Int2W'</b> | 17.2<br>(34.1)   | -2.0<br>(15.5)   |
| <b>TS3W'</b>  | 14.8<br>(32.2)   | -4.3<br>(13.9)   |
| <b>Int3W'</b> | -29.9<br>(-12.7) | -48.8<br>(-31.4) |
| <b>TS4W'</b>  | -19.9<br>(-3.5)  | -33.7<br>(-16.5) |
| <b>Int4W'</b> | -51.2<br>(-37.9) | -65.7<br>(-51.7) |

To further study basis set effects, we calculated the frequencies for a larger basis set, B3LYP (PBE1PBE)/6-311+G\*\*. Table S2 shows that the prediction trend of the two methods with 6-311+G\*\* basis set is similar, the rate-determining step is the intramolecular cyclization transition state **TS2W'**. PBE1PBE functional is better than B3LYP, because the  $\Delta E$  values of the nucleophilic attack transition state **TS1W'** and the transition state **TS2W'** at the PBE1PBE level are 11.9 kcal/mol and 16.4 kcal/mol lower than that for B3LYP functional. Thus, the PBE1PBE is kinetic and thermodynamic favor. Thus, we use PBE1PBE/6-311+G\*\* method to calculate the DMSO-assisted, trace water-catalyzed, and solvent-free conditions reaction mechanism of the domino cyclization of pyrroles.

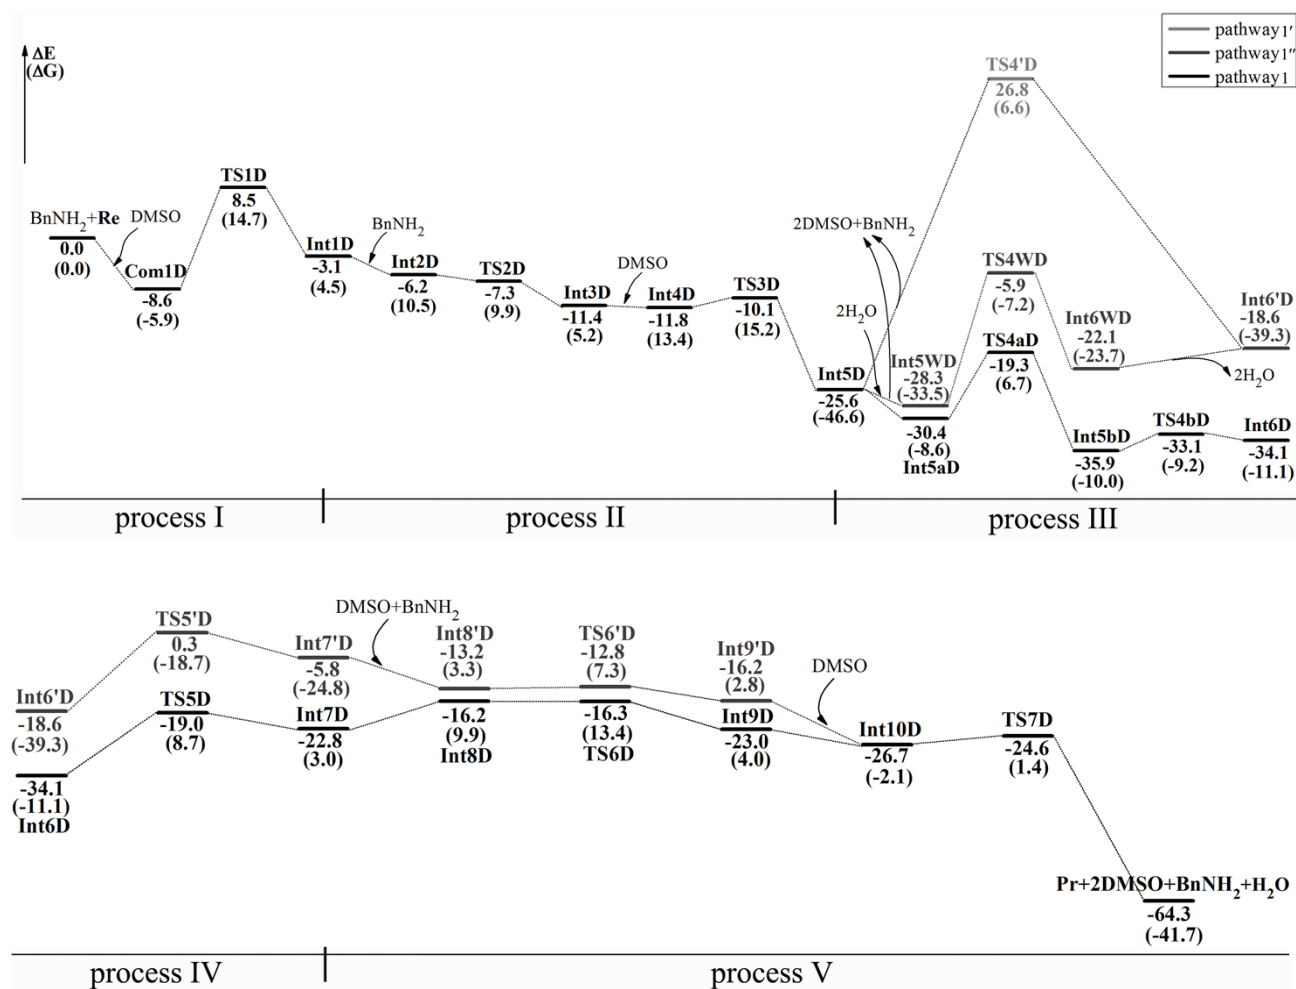

**Figure S1.** DFT computed energy surface for the DMSO-catalyzed domino reaction of pyrroles in the solvent phase, relative energies and free energies are given in kcal/mol.

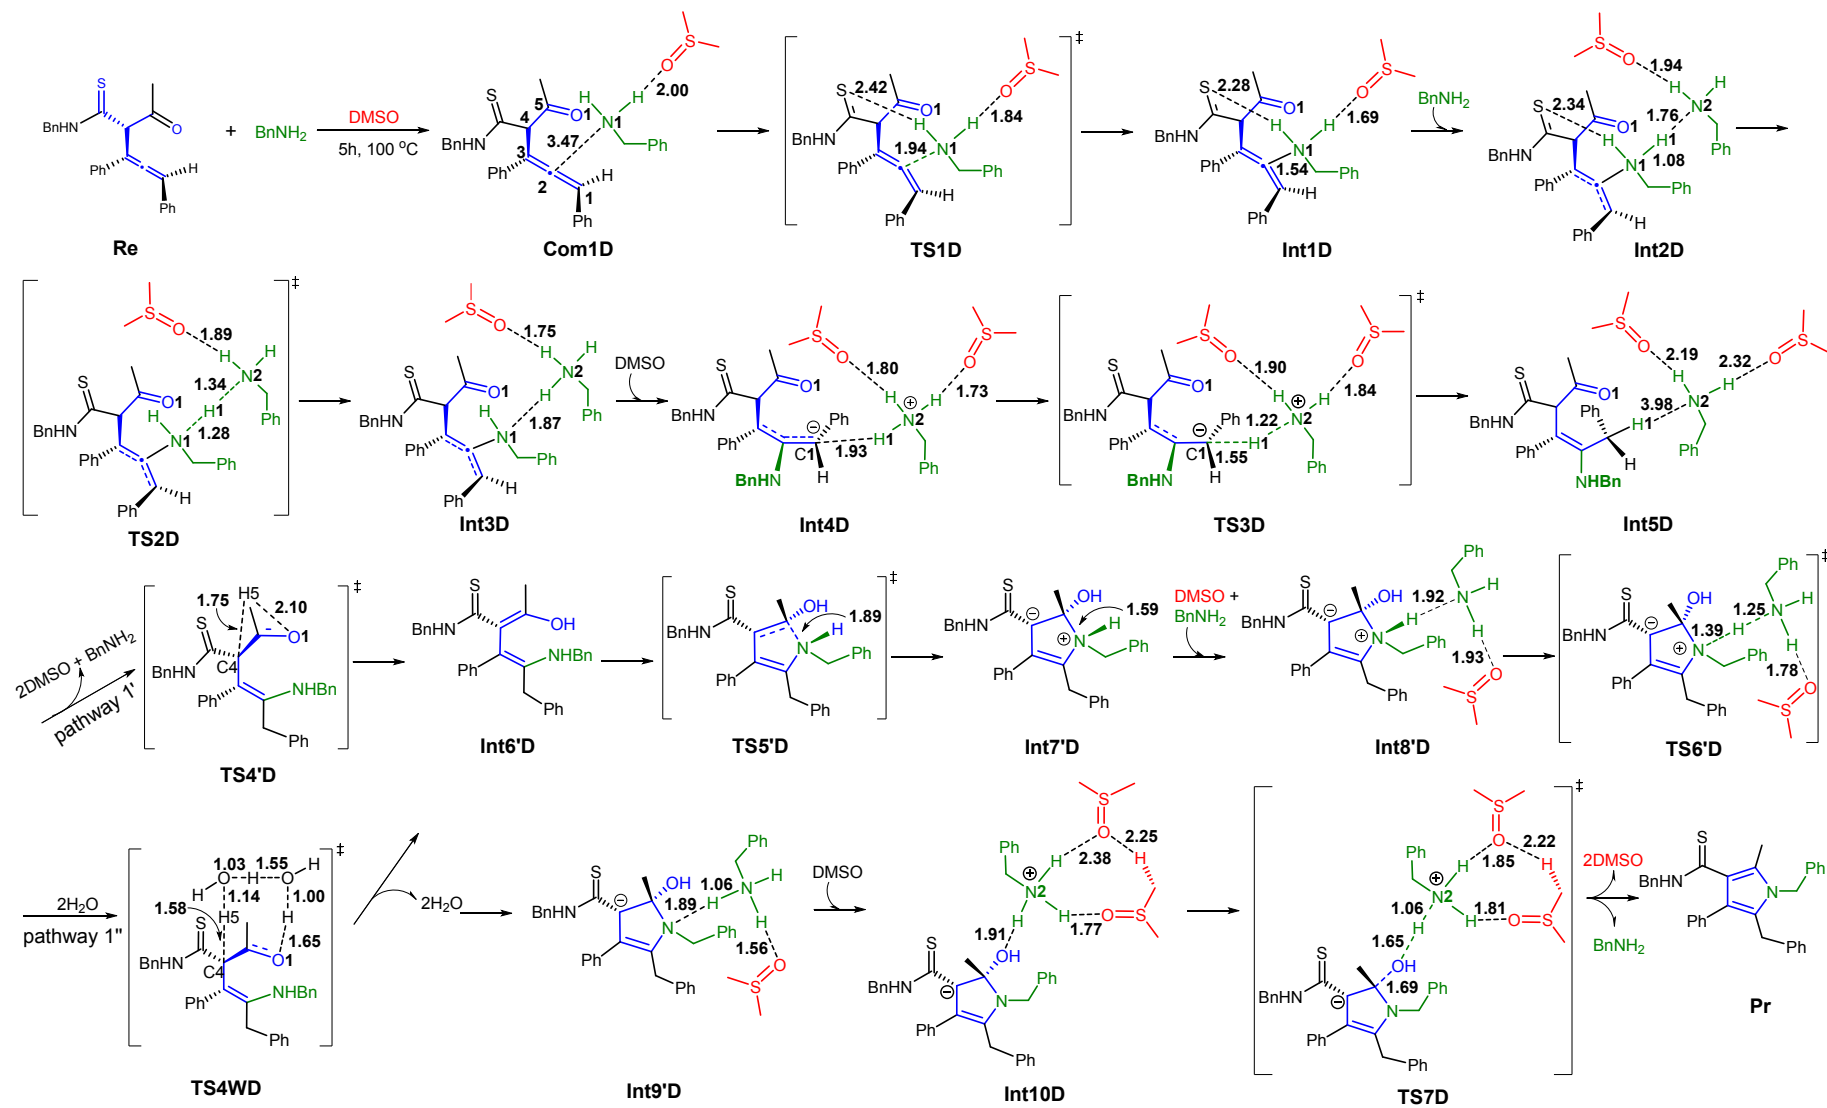

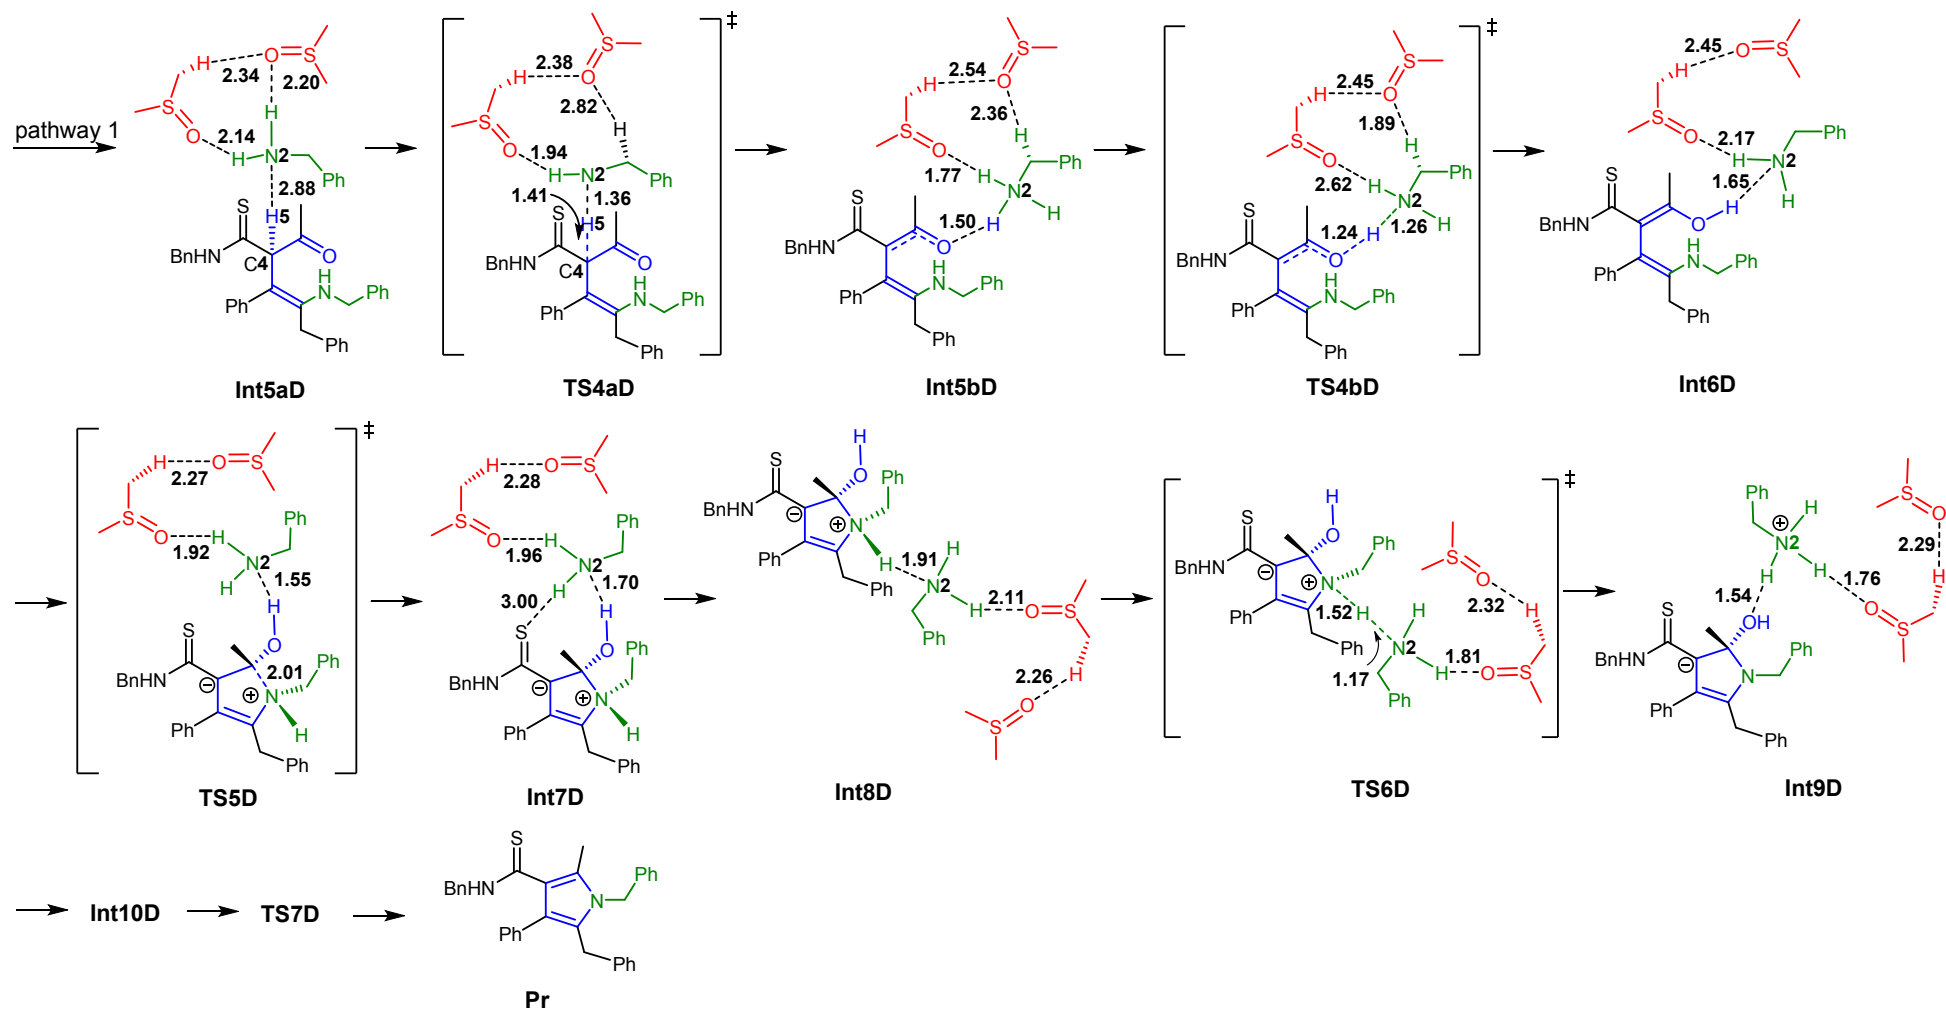

**Figure S2.** Structures of the DMSO-assisted domino cyclization of pyrroles, bond distances are in Å.

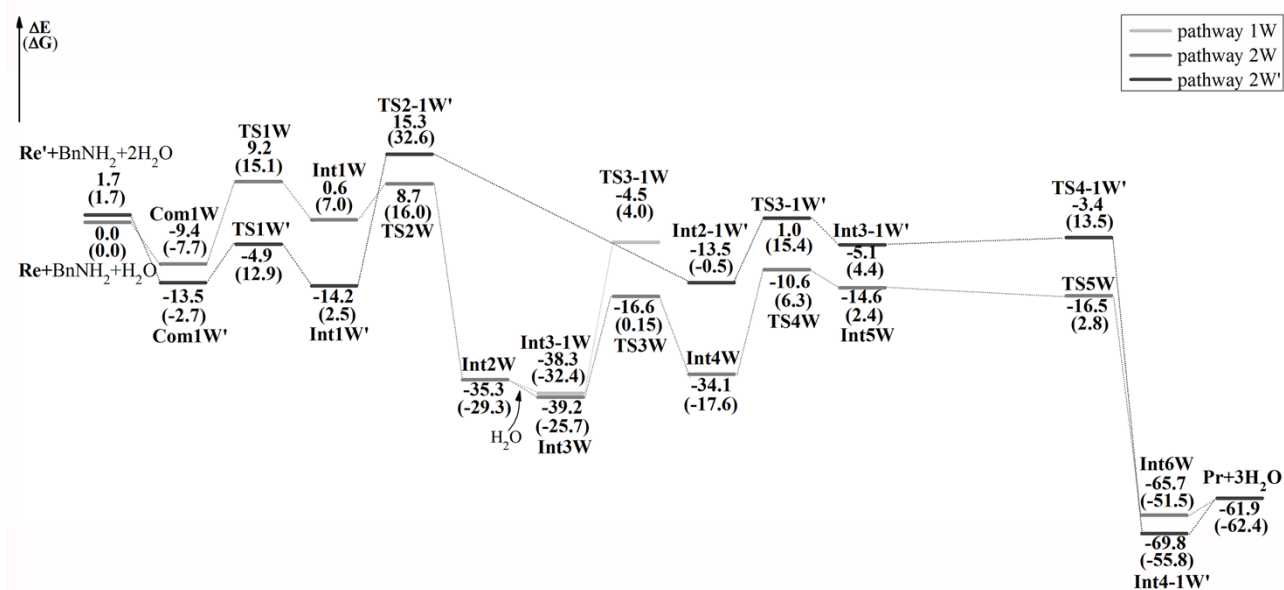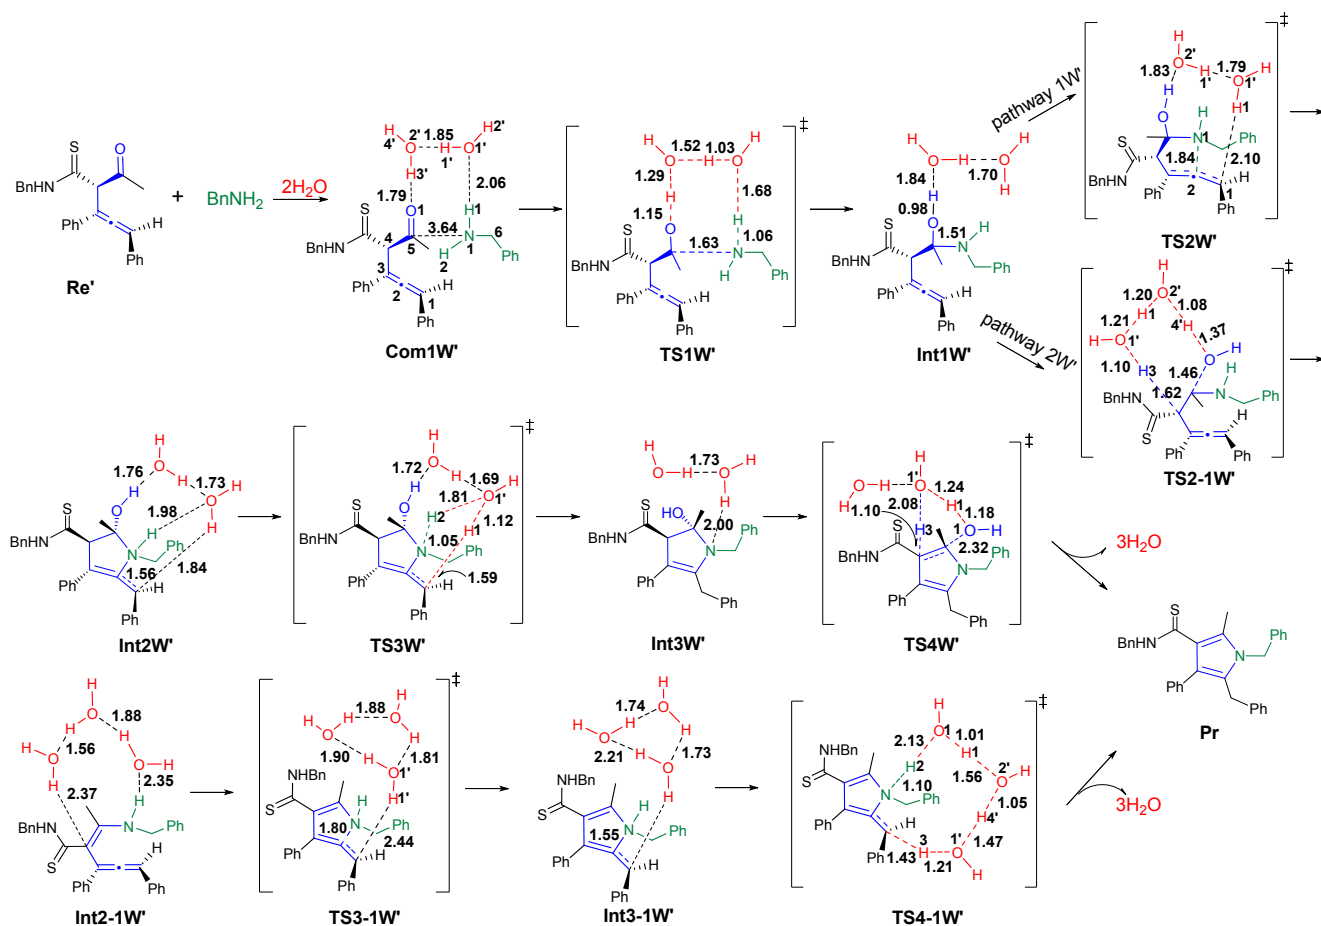

**Figure S3.** DFT computed energy surface for the water-catalyzed domino reaction of pyrroles and the corresponding geometry structures of reactants, intermediates, and transition states for pathways 1W' and 2W'. Distances are in Å and relative energies and free energies are given in kcal/mol.

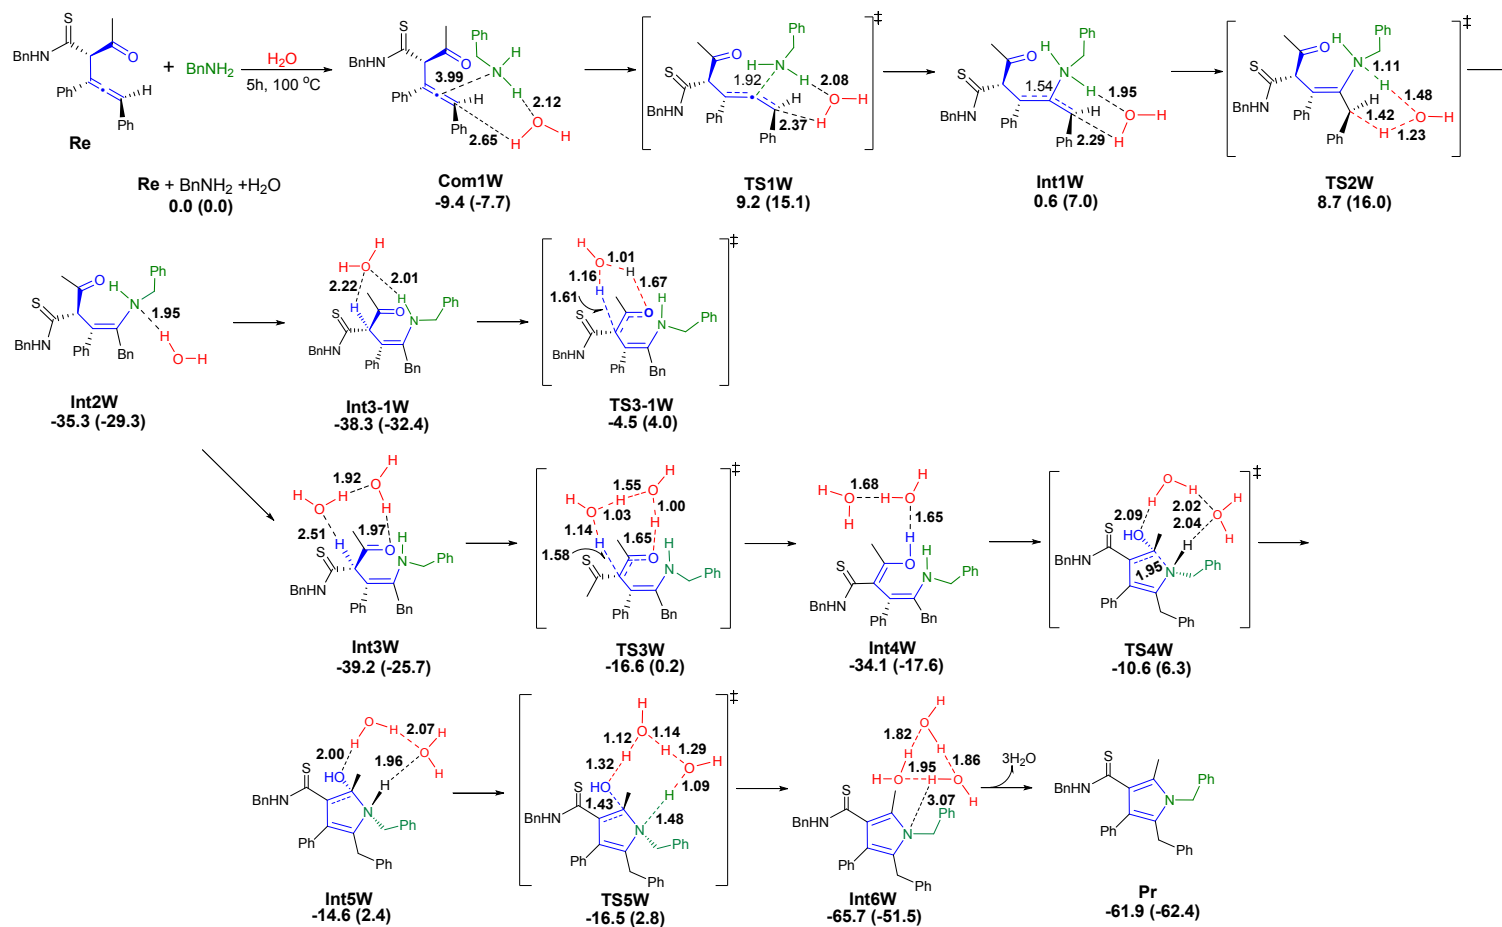

**Figure S4.** Structures of pathways 1W and 2W for the domino cyclization of pyrroles under trace water-catalyzed condition, bond distances are in Å.



### S1. The effect of water cluster on the keto-enol tautomerization step

It was thought that water molecules could form clusters in the reaction system and that water could act as a reactive medium by supplying the protons via a hydrogen bonding network. Thus, we calculate single water, two water, and three water molecules catalyzed the deprotonation and the [1,3]-H shift processes, namely, keto-enol tautomerization. Our calculation results suggested that the two-water cluster as catalyst is more favorable in reducing energy barrier of the keto-enol tautomerization than one water molecule, and similar with the results of three cluster.

**Table S3.** Single water and two water molecules catalyzed deprotonation of the nitrogen of BnNH<sub>2</sub> in the mechanism of BnNH<sub>2</sub> attack the allenic carbon of **Re**,  $\Delta\Delta E^\ddagger$  ( $\Delta\Delta G^\ddagger$ ) values are in kcal/mol.

| TSs | single water | two water molecules |
|-----|--------------|---------------------|
|     | 8.5          | 8.6                 |
|     | (9.0)        | (10.3)              |

Table S3 shows that the  $\Delta\Delta E^\ddagger$  and  $\Delta\Delta G^\ddagger$  values of single water catalyzed deprotonation process are 0.1 kcal/mol and 1.3 kcal/mol lower than that assisted by two water molecule.

**Table S4.** Single water, two water molecules and three water cluster catalyzed the [1,3]-H shift processes in the domino cyclization of pyrroles,  $\Delta\Delta E^\ddagger$  ( $\Delta\Delta G^\ddagger$ ) values are in kcal/mol.

| TSs | single water | two water molecules | three water molecules |
|-----|--------------|---------------------|-----------------------|
|     | 36.3         | 23.0                | 23.6                  |
|     | (25.6)       | (26.8)              | (28.8)                |

Table S4 suggests that the  $\Delta\Delta E^\ddagger$  in two water molecules catalyzed [1,3]-H shift process is lower by 13.3 kcal/mol and 0.6 kcal/mol compared to that in single water and three water molecules catalyzed. Thereby, in the following water-catalyst mechanism and considering entropic disadvantages, we employed a two-water cluster as catalyst to calculate the reaction system.

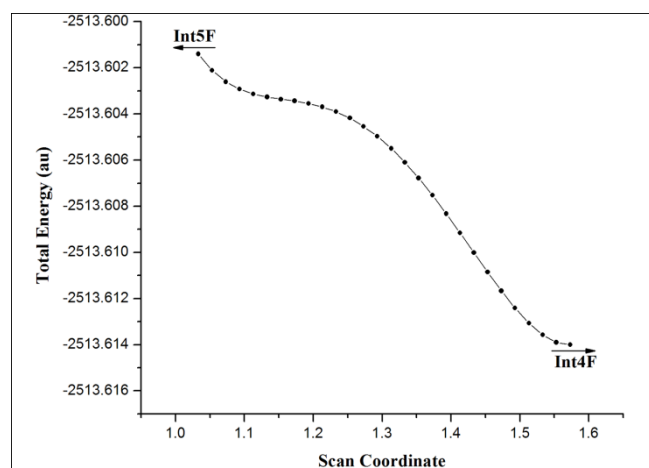

**Figure S5.** The potential energy surface scans for N2-H4 bond from **Int5F** to **Int4F**.

**Table S5.** Solvent Effects on the trace water-catalyzed mechanism of BnNH<sub>2</sub> attack to the carbonyl carbon of **Re'** for pathway 1W' at the PBE1PBE/6-311+G\*\* level,  $\Delta E$  ( $\Delta G$ ) values are in kcal/mol.

|                                             | PBE1PBE<br>(gas) | PBE1PBE<br>(solvent) | $\Delta E_{TS_{gas}} - \Delta E_{TS_{solvent}}$<br>( $\Delta G_{TS_{gas}} - \Delta G_{TS_{solvent}}$ ) |
|---------------------------------------------|------------------|----------------------|--------------------------------------------------------------------------------------------------------|
| <b>Re'+BnNH<sub>2</sub>+2H<sub>2</sub>O</b> | 0.0              | 0.0                  |                                                                                                        |
| <b>Com1W'</b>                               | -13.5<br>(-2.7)  | -6.6<br>(3.6)        | -6.9<br>(6.3)                                                                                          |
| <b>TS1W'</b>                                | -4.9<br>(12.9)   | 2.1<br>(19.6)        | -7.0<br>(-6.7)                                                                                         |
| <b>Int1W'</b>                               | -14.2<br>(2.5)   | -5.2<br>(11.4)       | -9.0<br>(-8.9)                                                                                         |
| <b>TS2W'</b>                                | 4.8<br>(21.9)    | 11.2<br>(28.0)       | -6.4<br>(-6.1)                                                                                         |
| <b>Int2W'</b>                               | -0.3<br>(17.2)   | 5.9<br>(23.1)        | 6.2<br>(-5.9)                                                                                          |
| <b>TS3W'</b>                                | -2.6<br>(15.6)   | 4.3<br>(22.4)        | -6.9<br>(-6.8)                                                                                         |
| <b>Int3W'</b>                               | -47.2<br>(-29.7) | -39.8<br>(-22.6)     | -7.4<br>(-7.1)                                                                                         |
| <b>TS4W'</b>                                | -32.0<br>(-14.9) | -24.4<br>(-7.6)      | -7.6<br>(-7.3)                                                                                         |
| <b>Int4W'</b>                               | -64.1<br>(-50.0) | -57.0<br>(-43.4)     | -7.1<br>(-6.6)                                                                                         |

From Table S5, obviously the energy values of TSs in gas phase are much lower than those in solvent phase.

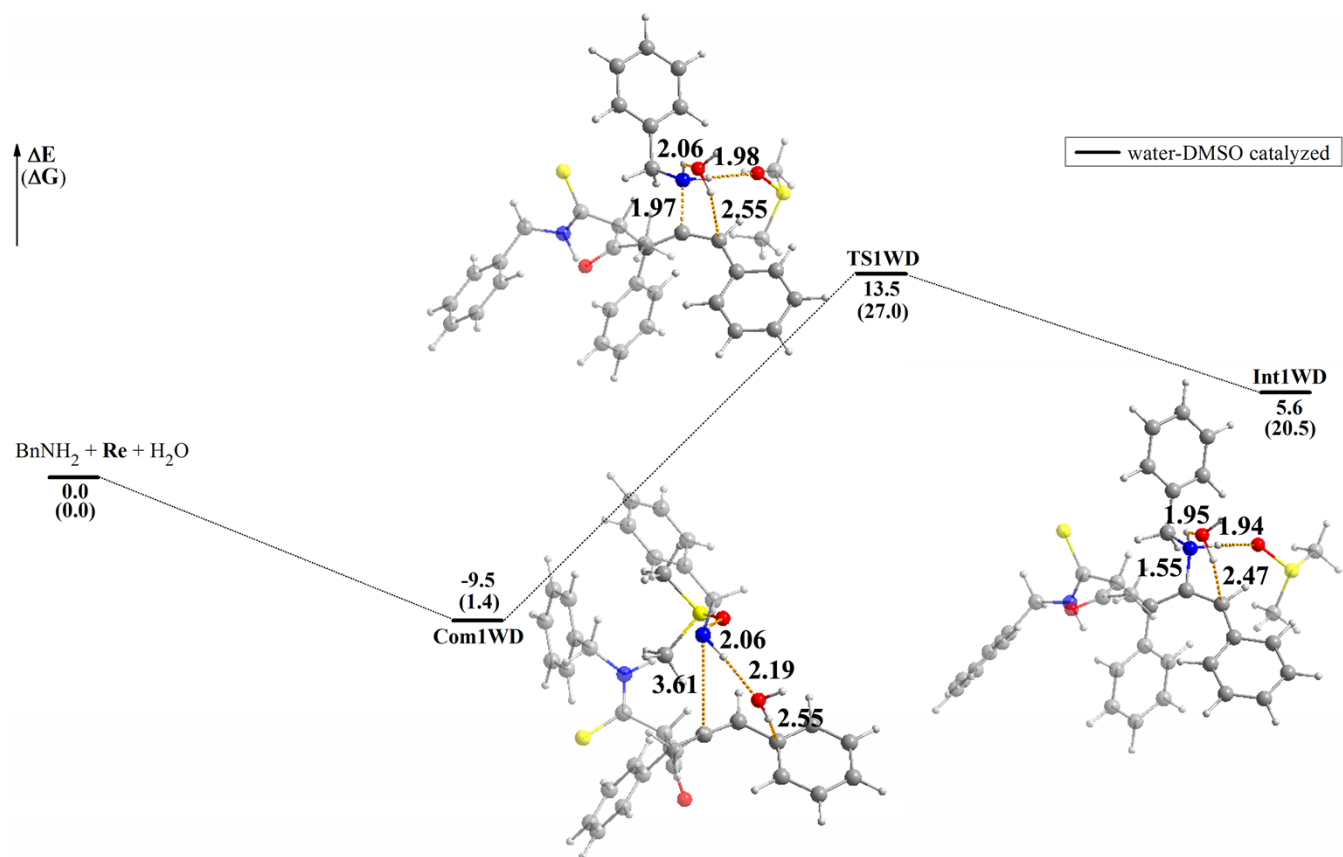

**Figure S6.** DFT computed energy profile of nucleophilic addition catalyzed by water-DMSO in solvent and the corresponding optimized structures, values and distances are in kcal/mol and Å.

## S2. The PBE1PBE/6-31G\*\* optimized coordinates for the formation of pyrroles.

Re

|   |             |             |             |
|---|-------------|-------------|-------------|
| C | -5.31220300 | -2.08444700 | -2.04228500 |
| C | -4.70987500 | -0.82671600 | -2.10882900 |
| C | -3.95820700 | -0.33889400 | -1.03439300 |
| C | -3.81413400 | -1.13494500 | 0.11189300  |
| C | -4.40874100 | -2.39433600 | 0.17533700  |
| C | -5.16062300 | -2.87169000 | -0.90078900 |
| H | -5.89515300 | -2.44884800 | -2.88307400 |
| H | -4.82608600 | -0.21739100 | -3.00148400 |
| H | -3.23721400 | -0.76609400 | 0.95569000  |
| H | -4.28782400 | -3.00049100 | 1.06822400  |
| H | -5.62642900 | -3.85137400 | -0.84858200 |
| C | -3.31777900 | 1.02939300  | -1.09850100 |
| H | -3.67646900 | 1.68140100  | -0.29372800 |
| H | -3.56625600 | 1.53500900  | -2.03913700 |

|   |             |             |             |
|---|-------------|-------------|-------------|
| N | -1.86327300 | 0.92953900  | -0.96438900 |
| H | -1.46187100 | 0.00325600  | -1.05022700 |
| C | -1.05035100 | 1.94330500  | -0.63813200 |
| S | -1.57806400 | 3.51303000  | -0.41581800 |
| C | 0.42978000  | 1.53481200  | -0.54799800 |
| C | 1.32526100  | 2.64979700  | 0.06297900  |
| O | 1.63029000  | 2.64387500  | 1.23744700  |
| C | 1.89316400  | 3.65596400  | -0.91438200 |
| H | 2.66306500  | 3.16027100  | -1.52079800 |
| H | 1.11902000  | 4.03019700  | -1.58774200 |
| H | 2.34924300  | 4.48064700  | -0.36554400 |
| H | 0.75612500  | 1.43128600  | -1.59125900 |
| C | 0.67418600  | 0.16327600  | 0.11533100  |
| C | -0.02370600 | -0.24972500 | 1.37091000  |
| C | -0.54785800 | 0.68734200  | 2.27594800  |
| C | -0.18244400 | -1.61758800 | 1.65790600  |
| C | -1.20932000 | 0.26380600  | 3.42938600  |
| H | -0.41158900 | 1.74596300  | 2.09668500  |
| C | -0.83504700 | -2.03643600 | 2.81406600  |
| H | 0.20995800  | -2.35345300 | 0.96247900  |
| C | -1.35711600 | -1.09580200 | 3.70530400  |
| H | -1.60262300 | 1.00570400  | 4.11808400  |
| H | -0.94211000 | -3.09856900 | 3.01521800  |
| H | -1.87136500 | -1.42002000 | 4.60526400  |
| C | 1.53334500  | -0.63725500 | -0.48485000 |
| C | 2.43150800  | -1.39204700 | -1.07749500 |
| H | 2.09139000  | -2.11988400 | -1.81682900 |
| C | 3.88820900  | -1.35548500 | -0.83688000 |
| C | 4.47026500  | -0.46126800 | 0.07896600  |
| C | 4.72203100  | -2.23677300 | -1.54212200 |
| C | 5.84706600  | -0.45446300 | 0.27819200  |
| H | 3.83534500  | 0.22539500  | 0.63176400  |
| C | 6.10173400  | -2.22812400 | -1.34036800 |
| H | 4.28233400  | -2.93225600 | -2.25261500 |
| C | 6.66926100  | -1.33707600 | -0.42958300 |
| H | 6.28232500  | 0.24127800  | 0.98962000  |
| H | 6.73191700  | -2.91750500 | -1.89474100 |
| H | 7.74345500  | -1.32852400 | -0.27067600 |

**BnNH<sub>2</sub>**

|   |             |             |             |
|---|-------------|-------------|-------------|
| C | -1.40538900 | -1.33729600 | 0.05678300  |
| C | -0.04147300 | -1.06901100 | 0.17240300  |
| C | 0.42991700  | 0.24981300  | 0.13832200  |
| C | -0.49310100 | 1.29007200  | -0.01993100 |
| C | -1.85889400 | 1.02438300  | -0.13022100 |
| C | -2.31951300 | -0.29214500 | -0.09251000 |
| H | -1.75611900 | -2.36543100 | 0.08333800  |
| H | 0.67642200  | -1.87563700 | 0.27957500  |
| H | -0.13877400 | 2.31780200  | -0.05920000 |
| H | -2.56062800 | 1.84459700  | -0.25363300 |
| H | -3.38134200 | -0.50247700 | -0.18345600 |
| C | 1.90821400  | 0.55195200  | 0.30118800  |
| H | 2.15593000  | 0.56159100  | 1.37191600  |
| H | 2.09831600  | 1.57653500  | -0.06312900 |
| N | 2.74718100  | -0.47611800 | -0.32311300 |
| H | 2.62962400  | -0.44780100 | -1.33348900 |
| H | 3.72773000  | -0.28295400 | -0.13634300 |

**DMSO**

|   |             |             |             |
|---|-------------|-------------|-------------|
| S | 0.00001800  | 0.24190600  | -0.43927200 |
| O | 0.00023500  | 1.50801500  | 0.38625300  |
| C | -1.36362400 | -0.82129200 | 0.18049100  |
| H | -2.29822400 | -0.31192500 | -0.06126500 |
| H | -1.33188800 | -1.79445700 | -0.31679000 |
| H | -1.27562400 | -0.93148800 | 1.26432200  |
| C | 1.36340000  | -0.82164700 | 0.18047400  |
| H | 1.33125300  | -1.79492900 | -0.31654800 |
| H | 2.29814200  | -0.31266500 | -0.06153800 |
| H | 1.27550900  | -0.93152300 | 1.26434700  |

**Com1D**

|   |            |             |            |
|---|------------|-------------|------------|
| C | 4.42551000 | -1.60630300 | 1.78260200 |
| C | 3.91417000 | -1.51850300 | 0.48454900 |
| C | 2.63016300 | -1.99121700 | 0.18946800 |
| C | 1.85633300 | -2.54021800 | 1.22267800 |
| C | 2.36354500 | -2.62103700 | 2.51993300 |
| C | 3.65146800 | -2.15822100 | 2.80428100 |
| H | 5.42926000 | -1.24618300 | 1.99164600 |

|   |             |             |             |
|---|-------------|-------------|-------------|
| H | 4.51891800  | -1.08072500 | -0.30547700 |
| H | 0.85883300  | -2.91078200 | 1.00798200  |
| H | 1.75266600  | -3.05562300 | 3.30609500  |
| H | 4.04937400  | -2.23327000 | 3.81249700  |
| C | 2.10618400  | -1.94944800 | -1.23530400 |
| H | 2.03105000  | -2.96271500 | -1.64238900 |
| H | 2.79563000  | -1.37444700 | -1.86200700 |
| N | 0.78411400  | -1.34320000 | -1.34428700 |
| H | 0.75529900  | -0.30658200 | -1.25142900 |
| C | -0.34426300 | -2.00736700 | -1.61973000 |
| S | -0.46063000 | -3.65471800 | -1.92228100 |
| C | -1.58445900 | -1.09682700 | -1.60537400 |
| C | -2.71923900 | -1.56929600 | -2.54242800 |
| O | -3.84468100 | -1.77247700 | -2.13219600 |
| C | -2.39836300 | -1.60216000 | -4.02476300 |
| H | -2.34753700 | -0.56954400 | -4.39482800 |
| H | -1.43970700 | -2.08358400 | -4.22444900 |
| H | -3.19838900 | -2.12240600 | -4.55272100 |
| H | -1.26896100 | -0.13640100 | -2.03519900 |
| C | -2.05333500 | -0.77827700 | -0.17008000 |
| C | -2.28729000 | -1.83305800 | 0.86532800  |
| C | -2.89963700 | -3.06203700 | 0.57129300  |
| C | -1.90398300 | -1.58112400 | 2.19395300  |
| C | -3.12114900 | -3.99981400 | 1.57964200  |
| H | -3.21965200 | -3.27430500 | -0.43874900 |
| C | -2.13021000 | -2.51787100 | 3.20012400  |
| H | -1.42418000 | -0.63691900 | 2.42993000  |
| C | -2.74032600 | -3.73571400 | 2.89544600  |
| H | -3.59912600 | -4.94270200 | 1.33064700  |
| H | -1.82688700 | -2.29772500 | 4.22010400  |
| H | -2.91546900 | -4.47136100 | 3.67522000  |
| C | -2.20154300 | 0.49214600  | 0.14190500  |
| C | -2.37946200 | 1.76452400  | 0.43176600  |
| H | -1.54264700 | 2.32189500  | 0.86015200  |
| C | -3.63033000 | 2.52410500  | 0.23158600  |
| C | -4.77622700 | 1.93562100  | -0.33261900 |
| C | -3.68276800 | 3.87426500  | 0.61129700  |
| C | -5.93740100 | 2.68189700  | -0.50657400 |
| H | -4.74501600 | 0.89225400  | -0.63431500 |

|   |             |            |             |
|---|-------------|------------|-------------|
| C | -4.84820000 | 4.61970600 | 0.43562300  |
| H | -2.80145500 | 4.33879000 | 1.04667600  |
| C | -5.98015800 | 4.02635600 | -0.12335400 |
| H | -6.81478300 | 2.21355300 | -0.94335700 |
| H | -4.87074000 | 5.66355100 | 0.73561900  |
| H | -6.88899100 | 4.60480600 | -0.26084400 |
| S | 1.72565900  | 2.63659500 | 2.85478300  |
| O | 1.26872700  | 2.90131600 | 1.42228500  |
| C | 3.46069500  | 2.06260100 | 2.77957300  |
| H | 4.05870900  | 2.90311100 | 2.42283600  |
| H | 3.78535400  | 1.78058800 | 3.78460100  |
| H | 3.54791800  | 1.21721800 | 2.09298400  |
| C | 0.99249300  | 1.04598600 | 3.37557800  |
| H | 1.37074300  | 0.78447600 | 4.36723800  |
| H | -0.08725200 | 1.19783500 | 3.42227800  |
| H | 1.23354800  | 0.26414400 | 2.65153700  |
| C | 5.20254100  | 2.20916200 | -1.15207000 |
| C | 3.84616500  | 2.53061500 | -1.20257300 |
| C | 3.02331200  | 2.00533100 | -2.20881100 |
| C | 3.59186900  | 1.15515000 | -3.16465000 |
| C | 4.95045200  | 0.83292000 | -3.11912100 |
| C | 5.75966200  | 1.35926200 | -2.11104900 |
| H | 5.82995300  | 2.62974400 | -0.37090800 |
| H | 3.41174400  | 3.18917400 | -0.45455400 |
| H | 2.96771400  | 0.74788300 | -3.95630600 |
| H | 5.37616100  | 0.17782500 | -3.87379800 |
| H | 6.81783900  | 1.11667900 | -2.07778200 |
| C | 1.55051900  | 2.35304700 | -2.24245600 |
| H | 1.14004900  | 2.10620200 | -3.22758100 |
| H | 1.43830600  | 3.44013600 | -2.11135400 |
| N | 0.79044000  | 1.59672600 | -1.22300800 |
| H | 1.11006900  | 1.87793400 | -0.29001200 |
| H | -0.18349100 | 1.89685100 | -1.25367200 |

**TS1D**

|   |             |             |             |
|---|-------------|-------------|-------------|
| C | -6.67089300 | -1.02580400 | 0.86881800  |
| C | -5.32260600 | -1.29623800 | 0.64032800  |
| C | -4.93374900 | -2.11240100 | -0.43195400 |
| C | -5.91931500 | -2.65176700 | -1.26520600 |

|   |             |             |             |
|---|-------------|-------------|-------------|
| C | -7.27032600 | -2.38641800 | -1.03365600 |
| C | -7.64833900 | -1.57189200 | 0.03336300  |
| H | -6.95998700 | -0.39206500 | 1.70219000  |
| H | -4.56473300 | -0.86873900 | 1.29174300  |
| H | -5.62724800 | -3.28408600 | -2.09975000 |
| H | -8.02449800 | -2.81331200 | -1.68829800 |
| H | -8.69861000 | -1.36277400 | 0.21430000  |
| C | -3.47195000 | -2.41528800 | -0.67156800 |
| H | -3.35111900 | -3.15816000 | -1.46910500 |
| H | -3.00058100 | -2.84345500 | 0.21998000  |
| N | -2.73005100 | -1.20351700 | -1.02325400 |
| H | -3.24892200 | -0.37288900 | -1.31911500 |
| C | -1.40781100 | -1.12127100 | -1.09208900 |
| S | -0.39112600 | -2.44730100 | -0.81087400 |
| C | -0.80833200 | 0.24542200  | -1.45065000 |
| C | -1.68229400 | 1.20786800  | -2.26416600 |
| O | -2.90827000 | 1.23696800  | -2.19744100 |
| C | -0.93923900 | 2.15470700  | -3.18193600 |
| H | -0.01620800 | 2.52132100  | -2.72834800 |
| H | -0.67093600 | 1.61048400  | -4.09722900 |
| H | -1.58807900 | 2.98890700  | -3.45228800 |
| H | 0.04781800  | 0.01789400  | -2.09111800 |
| C | -0.22063900 | 1.01179100  | -0.24407900 |
| C | -0.97604800 | 1.25504500  | 1.00312000  |
| C | -2.37827600 | 1.41987100  | 1.04063700  |
| C | -0.29257400 | 1.35155600  | 2.23930900  |
| C | -3.05122200 | 1.65693700  | 2.24106100  |
| H | -2.95216500 | 1.40172700  | 0.12339200  |
| C | -0.96795900 | 1.59947700  | 3.42987300  |
| H | 0.78513300  | 1.22288900  | 2.25476300  |
| C | -2.35814900 | 1.74809600  | 3.44691100  |
| H | -4.13007800 | 1.79136800  | 2.22161400  |
| H | -0.40199500 | 1.67319300  | 4.35545000  |
| H | -2.88450400 | 1.93897600  | 4.37730600  |
| C | 1.10745900  | 1.34921400  | -0.31509000 |
| C | 1.97640400  | 2.36498100  | -0.19822600 |
| H | 3.02600000  | 2.13380900  | -0.02942900 |
| C | 1.67601200  | 3.80100500  | -0.26867200 |
| C | 0.37122800  | 4.33303200  | -0.28141400 |



|   |             |             |             |
|---|-------------|-------------|-------------|
| C | 2.75566400  | 4.70478300  | -0.32656700 |
| C | 0.16474000  | 5.70709800  | -0.37794700 |
| H | -0.47624700 | 3.66362600  | -0.19798000 |
| C | 2.54578200  | 6.07814500  | -0.41451300 |
| H | 3.77102800  | 4.31613600  | -0.30625200 |
| C | 1.24633400  | 6.58836900  | -0.44579100 |
| H | -0.85082100 | 6.09341300  | -0.38470000 |
| H | 3.39769900  | 6.75108800  | -0.45899300 |
| H | 1.07877600  | 7.65943100  | -0.51117800 |
| S | 2.82929700  | -1.83445600 | 3.01900600  |
| O | 3.14066800  | -0.62009400 | 2.14426400  |
| C | 3.30118200  | -3.32446200 | 2.06778500  |
| H | 4.37986100  | -3.27879900 | 1.91118000  |
| H | 3.04309900  | -4.21369500 | 2.64891800  |
| H | 2.79131500  | -3.32973100 | 1.10199600  |
| C | 1.02283100  | -2.10813000 | 2.98023800  |
| H | 0.79272200  | -2.99057800 | 3.58380400  |
| H | 0.55293300  | -1.22452000 | 3.41545300  |
| H | 0.67259000  | -2.23611900 | 1.95215900  |
| C | 6.21306700  | -2.50415000 | -0.66213500 |
| C | 5.38971900  | -1.38457400 | -0.79267400 |
| C | 4.17062800  | -1.46980100 | -1.47748900 |
| C | 3.79111600  | -2.70230200 | -2.02826800 |
| C | 4.61082000  | -3.82318600 | -1.89706400 |
| C | 5.82575800  | -3.72665300 | -1.21436300 |
| H | 7.15968400  | -2.41917300 | -0.13596200 |
| H | 5.69407300  | -0.43648500 | -0.35712800 |
| H | 2.84536000  | -2.78300900 | -2.55852600 |
| H | 4.30476500  | -4.76949900 | -2.33368200 |
| H | 6.46846700  | -4.59697500 | -1.11865500 |
| C | 3.25876900  | -0.26466800 | -1.58864900 |
| H | 2.75888900  | -0.25095500 | -2.56273800 |
| H | 3.83909700  | 0.65987000  | -1.51204000 |
| N | 2.21345000  | -0.23024400 | -0.54665900 |
| H | 1.52602700  | -0.98402300 | -0.68081400 |
| H | 2.61092000  | -0.35599500 | 0.40012000  |

**Int1D**

|   |             |             |            |
|---|-------------|-------------|------------|
| C | -6.60555600 | -0.28874100 | 0.87627100 |
|---|-------------|-------------|------------|

|   |             |             |             |
|---|-------------|-------------|-------------|
| C | -5.29097600 | -0.73214300 | 0.74192900  |
| C | -4.99999400 | -1.86528300 | -0.03179000 |
| C | -6.04798500 | -2.54242400 | -0.66367400 |
| C | -7.36574900 | -2.10233000 | -0.52447000 |
| C | -7.64673300 | -0.97385000 | 0.24512600  |
| H | -6.81831200 | 0.59041200  | 1.47749200  |
| H | -4.48416800 | -0.19287400 | 1.23126800  |
| H | -5.83198400 | -3.41994000 | -1.26788300 |
| H | -8.16936500 | -2.63884600 | -1.02039400 |
| H | -8.67067000 | -0.62815000 | 0.35256900  |
| C | -3.57594400 | -2.35842500 | -0.16001000 |
| H | -3.53661000 | -3.28300200 | -0.74897300 |
| H | -3.14511300 | -2.59615600 | 0.81819600  |
| N | -2.71554400 | -1.34910600 | -0.77982600 |
| H | -3.13997900 | -0.64085300 | -1.38693700 |
| C | -1.39392000 | -1.31929100 | -0.70329800 |
| S | -0.48907700 | -2.52169700 | 0.09029200  |
| C | -0.66311100 | -0.15137000 | -1.38429500 |
| C | -1.39505500 | 0.59360800  | -2.50711100 |
| O | -2.61792600 | 0.63010900  | -2.62508400 |
| C | -0.51452400 | 1.30377100  | -3.51656900 |
| H | 0.45609900  | 1.58280300  | -3.10473700 |
| H | -0.35734400 | 0.62832900  | -4.36832200 |
| H | -1.03266900 | 2.18921000  | -3.88969500 |
| H | 0.17126900  | -0.62683200 | -1.90799900 |
| C | -0.03485100 | 0.87067500  | -0.41599600 |
| C | -0.85344400 | 1.68913900  | 0.48015900  |
| C | -2.26618500 | 1.78773100  | 0.37478400  |
| C | -0.27586700 | 2.41445800  | 1.55979600  |
| C | -3.02929100 | 2.51648900  | 1.28554900  |
| H | -2.78609900 | 1.31367000  | -0.44379400 |
| C | -1.04500700 | 3.13322000  | 2.46790000  |
| H | 0.80028500  | 2.41033800  | 1.68056000  |
| C | -2.43566900 | 3.19380000  | 2.35043700  |
| H | -4.10669300 | 2.56248700  | 1.14315300  |
| H | -0.54401400 | 3.66561400  | 3.27319100  |
| H | -3.03280900 | 3.76672200  | 3.05321300  |
| C | 1.38985800  | 0.90997500  | -0.38924800 |
| C | 2.32195100  | 1.91356500  | -0.26734700 |

|   |            |             |             |
|---|------------|-------------|-------------|
| H | 3.32133100 | 1.60210000  | 0.03399100  |
| C | 2.21034300 | 3.34590700  | -0.48957400 |
| C | 1.04439300 | 4.01252700  | -0.93014500 |
| C | 3.36816400 | 4.13554100  | -0.29272300 |
| C | 1.05533200 | 5.38292200  | -1.18236100 |
| H | 0.13135200 | 3.45189900  | -1.07804100 |
| C | 3.37002500 | 5.50419900  | -0.53257400 |
| H | 4.27993100 | 3.65128400  | 0.04998600  |
| C | 2.20997200 | 6.14133200  | -0.98362500 |
| H | 0.14349600 | 5.86452400  | -1.52569800 |
| H | 4.27905000 | 6.07712000  | -0.36916000 |
| H | 2.20596600 | 7.21132000  | -1.16979600 |
| S | 2.72439500 | -1.14010300 | 3.32884700  |
| O | 3.35731200 | -0.61693800 | 2.03084800  |
| C | 2.38076100 | -2.91621600 | 3.06847100  |
| H | 3.34176300 | -3.40393400 | 2.89734000  |
| H | 1.91103500 | -3.32119300 | 3.96856500  |
| H | 1.73060200 | -3.04744900 | 2.20061900  |
| C | 0.99216400 | -0.56967800 | 3.37304100  |
| H | 0.52817900 | -0.95518900 | 4.28500200  |
| H | 1.00391400 | 0.52082300  | 3.39569300  |
| H | 0.45128900 | -0.91327200 | 2.48744100  |
| C | 5.34060600 | -3.55203800 | -0.34469800 |
| C | 4.73350400 | -2.30453900 | -0.48232100 |
| C | 3.65887800 | -2.13248700 | -1.36729600 |
| C | 3.20585800 | -3.23196300 | -2.10664000 |
| C | 3.81504100 | -4.47983800 | -1.97120200 |
| C | 4.88479900 | -4.64169500 | -1.09047500 |
| H | 6.17580300 | -3.67159600 | 0.33931800  |
| H | 5.08267400 | -1.46505800 | 0.11154100  |
| H | 2.37125300 | -3.11114300 | -2.79214000 |
| H | 3.45439600 | -5.32236900 | -2.55351400 |
| H | 5.36284900 | -5.61131200 | -0.98647700 |
| C | 3.00097500 | -0.78222700 | -1.52175900 |
| H | 2.41716600 | -0.73139100 | -2.44447400 |
| H | 3.73340200 | 0.02568600  | -1.55053900 |
| N | 2.06502600 | -0.46927900 | -0.38432900 |
| H | 1.33261400 | -1.20783500 | -0.30815100 |
| H | 2.58697000 | -0.53972200 | 0.52874700  |

**Int2D**

|   |            |             |             |
|---|------------|-------------|-------------|
| C | 7.27893000 | -1.05610000 | -1.34573200 |
| C | 5.94046300 | -1.26585200 | -1.01654700 |
| C | 5.59188400 | -2.18102300 | -0.01247600 |
| C | 6.60613200 | -2.88013700 | 0.65020500  |
| C | 7.94668300 | -2.67506900 | 0.31717400  |
| C | 8.28543500 | -1.76166300 | -0.68108300 |
| H | 7.53672200 | -0.34357900 | -2.12474300 |
| H | 5.16032700 | -0.71170500 | -1.53310200 |
| H | 6.34542100 | -3.59016600 | 1.43189700  |
| H | 8.72371900 | -3.22588800 | 0.84047800  |
| H | 9.32808100 | -1.59857300 | -0.94042300 |
| C | 4.13899500 | -2.41829700 | 0.33458600  |
| H | 4.03879400 | -3.22672100 | 1.06982800  |
| H | 3.56176900 | -2.72527500 | -0.54487000 |
| N | 3.51360500 | -1.20418200 | 0.86314800  |
| H | 4.11295500 | -0.45714000 | 1.22564700  |
| C | 2.20992600 | -1.02382500 | 1.01617900  |
| S | 1.06730100 | -2.23420700 | 0.66959500  |
| C | 1.73183500 | 0.34220400  | 1.52637900  |
| C | 2.71050400 | 1.17780600  | 2.36095500  |
| O | 3.93337600 | 1.07531100  | 2.29320800  |
| C | 2.08206000 | 2.17380400  | 3.31733600  |
| H | 1.11044200 | 2.53158200  | 2.97035100  |
| H | 1.94725700 | 1.68105900  | 4.29104600  |
| H | 2.76149300 | 3.01697300  | 3.46290600  |
| H | 0.92991900 | 0.10699800  | 2.23354700  |
| C | 1.10114800 | 1.23788000  | 0.44166200  |
| C | 1.85356100 | 1.69211100  | -0.72966200 |
| C | 3.27043100 | 1.67480800  | -0.81468300 |
| C | 1.18270200 | 2.14792800  | -1.89779300 |
| C | 3.94751200 | 2.04965900  | -1.97519300 |
| H | 3.86431100 | 1.39686500  | 0.04422400  |
| C | 1.86314200 | 2.51797700  | -3.05128300 |
| H | 0.10007200 | 2.21358200  | -1.88884400 |
| C | 3.25864400 | 2.46927700  | -3.11281100 |
| H | 5.03579100 | 2.02719900  | -1.97431000 |
| H | 1.29195400 | 2.85389600  | -3.91443000 |

|   |             |             |             |
|---|-------------|-------------|-------------|
| H | 3.79016700  | 2.76677500  | -4.01243800 |
| C | -0.29104100 | 1.50910900  | 0.59140900  |
| C | -1.06793400 | 2.62697800  | 0.39769300  |
| H | -2.14341500 | 2.45893700  | 0.33710200  |
| C | -0.70518800 | 4.03110500  | 0.28424300  |
| C | 0.61048900  | 4.54258200  | 0.35666100  |
| C | -1.75187900 | 4.97109800  | 0.12859800  |
| C | 0.84993400  | 5.91438900  | 0.30039500  |
| H | 1.44468200  | 3.86176400  | 0.45872600  |
| C | -1.50736000 | 6.33747900  | 0.05963400  |
| H | -2.77721400 | 4.60879400  | 0.07044900  |
| C | -0.19887700 | 6.82276500  | 0.14726700  |
| H | 1.87419700  | 6.27435800  | 0.36286500  |
| H | -2.33931400 | 7.02744600  | -0.06112300 |
| H | -0.00164400 | 7.88991200  | 0.08982800  |
| S | -2.25305300 | -4.24757100 | -2.20459800 |
| O | -2.82042400 | -2.86732400 | -2.52527400 |
| C | -2.12231600 | -4.37568700 | -0.38588900 |
| H | -3.13643700 | -4.32585100 | 0.01649900  |
| H | -1.66492900 | -5.33517000 | -0.12564800 |
| H | -1.52884400 | -3.54706500 | 0.00962600  |
| C | -0.45826800 | -4.18830900 | -2.55334900 |
| H | -0.01272500 | -5.15487300 | -2.29869100 |
| H | -0.34897900 | -4.00262800 | -3.62453900 |
| H | 0.01422600  | -3.38633700 | -1.97817800 |
| C | -4.78357000 | -2.25627900 | 2.14475000  |
| C | -4.06698200 | -1.07952000 | 1.92248500  |
| C | -2.75806500 | -0.94334900 | 2.40334900  |
| C | -2.18022800 | -2.00720300 | 3.11103900  |
| C | -2.89618900 | -3.18282200 | 3.33572600  |
| C | -4.20152100 | -3.30904400 | 2.85377900  |
| H | -5.79794700 | -2.34214800 | 1.76615700  |
| H | -4.53219400 | -0.26369000 | 1.37589600  |
| H | -1.16374100 | -1.91616600 | 3.48582900  |
| H | -2.43746900 | -3.99566700 | 3.89215100  |
| H | -4.76433300 | -4.22070800 | 3.03728600  |
| C | -1.98334500 | 0.33224900  | 2.16973500  |
| H | -1.29664500 | 0.53753800  | 2.99652900  |
| H | -2.65046400 | 1.18980300  | 2.07576300  |

|   |             |             |             |
|---|-------------|-------------|-------------|
| N | -1.15110700 | 0.28304100  | 0.91651100  |
| H | -0.53825300 | -0.55791100 | 0.92874500  |
| H | -1.75617700 | 0.13064100  | 0.03868800  |
| C | -6.47614200 | 1.40801300  | -0.29676000 |
| C | -5.23059300 | 1.57165600  | -0.90922100 |
| C | -4.63852600 | 0.52450000  | -1.62639600 |
| C | -5.32086400 | -0.69770800 | -1.72211400 |
| C | -6.56448100 | -0.86303100 | -1.11127800 |
| C | -7.14671600 | 0.18809100  | -0.39686100 |
| H | -6.92289200 | 2.23413100  | 0.25049600  |
| H | -4.71731400 | 2.52863500  | -0.83990800 |
| H | -4.86865200 | -1.52352100 | -2.26608900 |
| H | -7.08532000 | -1.81327700 | -1.20031800 |
| H | -8.11915600 | 0.05933400  | 0.07139600  |
| C | -3.29110200 | 0.70627300  | -2.29387700 |
| H | -2.99199400 | 1.75769400  | -2.23671100 |
| H | -3.37671200 | 0.44910500  | -3.36071800 |
| N | -2.23331200 | -0.09899800 | -1.63728300 |
| H | -2.40698600 | -1.09546700 | -1.82387000 |
| H | -1.34378600 | 0.11308300  | -2.09443800 |

**TS2D**

|   |            |             |             |
|---|------------|-------------|-------------|
| C | 6.98295100 | -0.87845800 | -0.80699400 |
| C | 5.65836600 | -1.11467100 | -0.44247400 |
| C | 5.35590600 | -1.74482200 | 0.77364000  |
| C | 6.40499100 | -2.13509400 | 1.61231500  |
| C | 7.73287100 | -1.90480300 | 1.24618400  |
| C | 8.02426400 | -1.27478600 | 0.03637000  |
| H | 7.20369800 | -0.38620600 | -1.75038800 |
| H | 4.84975900 | -0.80479300 | -1.10072500 |
| H | 6.18124000 | -2.62217300 | 2.55870200  |
| H | 8.53706300 | -2.21416500 | 1.90840200  |
| H | 9.05665400 | -1.09142200 | -0.24891600 |
| C | 3.91743500 | -2.00820300 | 1.15998800  |
| H | 3.86270400 | -2.60058800 | 2.08232600  |
| H | 3.39660500 | -2.58848800 | 0.39030600  |
| N | 3.17797800 | -0.75906400 | 1.34152800  |
| H | 3.70098100 | 0.10837100  | 1.50381500  |
| C | 1.85503100 | -0.64075600 | 1.31678400  |

|   |             |             |             |
|---|-------------|-------------|-------------|
| S | 0.80933100  | -1.95749800 | 1.10678300  |
| C | 1.26450800  | 0.76469700  | 1.53575100  |
| C | 2.19152300  | 1.85646100  | 2.07404600  |
| O | 3.40584100  | 1.88808700  | 1.86841600  |
| C | 1.53574400  | 2.94532300  | 2.90295900  |
| H | 0.47918500  | 3.08284500  | 2.66558100  |
| H | 1.62338200  | 2.66467900  | 3.96291600  |
| H | 2.07425400  | 3.88597700  | 2.76457900  |
| H | 0.51754600  | 0.61847700  | 2.32450400  |
| C | 0.51285800  | 1.40405500  | 0.35448400  |
| C | 1.12821700  | 1.61206900  | -0.94197100 |
| C | 2.51109400  | 1.37532500  | -1.19969300 |
| C | 0.37167700  | 2.01891000  | -2.08531800 |
| C | 3.05598900  | 1.46709900  | -2.47671400 |
| H | 3.17723200  | 1.14772200  | -0.38057100 |
| C | 0.92661000  | 2.09776700  | -3.36038200 |
| H | -0.66471800 | 2.31185000  | -1.95538000 |
| C | 2.27451900  | 1.80762400  | -3.58537800 |
| H | 4.12247200  | 1.28553500  | -2.60149200 |
| H | 0.29338900  | 2.41487300  | -4.18717700 |
| H | 2.70888700  | 1.88550100  | -4.57798500 |
| C | -0.89587000 | 1.63698200  | 0.57930300  |
| C | -1.69014900 | 2.72904000  | 0.34919400  |
| H | -2.76504700 | 2.56568500  | 0.41848700  |
| C | -1.35378200 | 4.12266800  | 0.07217200  |
| C | -0.04713300 | 4.63277700  | -0.09425300 |
| C | -2.42131900 | 5.04651300  | -0.00943800 |
| C | 0.16784600  | 5.99444300  | -0.30208300 |
| H | 0.79819100  | 3.95922500  | -0.05712400 |
| C | -2.20370900 | 6.40189400  | -0.23013900 |
| H | -3.44014000 | 4.68274600  | 0.11275500  |
| C | -0.90144600 | 6.88860400  | -0.37598600 |
| H | 1.18637600  | 6.35602600  | -0.42189500 |
| H | -3.05114800 | 7.08106900  | -0.28640400 |
| H | -0.72504400 | 7.94655400  | -0.55144500 |
| S | 0.03870700  | -3.37380000 | -3.25553300 |
| O | -1.30276500 | -2.82356400 | -2.76573400 |
| C | 0.66325800  | -4.49484600 | -1.95372100 |
| H | -0.05193100 | -5.31688200 | -1.87232200 |

|   |             |             |             |
|---|-------------|-------------|-------------|
| H | 1.63913800  | -4.88510300 | -2.25944100 |
| H | 0.73774500  | -3.95888100 | -1.00275200 |
| C | 1.28971400  | -2.05935100 | -3.03707100 |
| H | 2.26709200  | -2.45758200 | -3.32688000 |
| H | 1.02675400  | -1.22774000 | -3.69501700 |
| H | 1.30378500  | -1.71907800 | -1.99776200 |
| C | -3.91279100 | -2.99062900 | 2.95194700  |
| C | -3.75810700 | -1.81568800 | 2.21609300  |
| C | -2.98949600 | -0.75782300 | 2.71916100  |
| C | -2.38496200 | -0.89877300 | 3.97558200  |
| C | -2.53944000 | -2.07252900 | 4.71305400  |
| C | -3.30396800 | -3.12243200 | 4.20140400  |
| H | -4.51337900 | -3.80163400 | 2.54876700  |
| H | -4.24127300 | -1.71852500 | 1.24774000  |
| H | -1.79452700 | -0.07996800 | 4.38157300  |
| H | -2.06645000 | -2.16538100 | 5.68700100  |
| H | -3.42728700 | -4.03704600 | 4.77526700  |
| C | -2.79923400 | 0.50951400  | 1.91917600  |
| H | -2.61549800 | 1.36582400  | 2.57657900  |
| H | -3.70163700 | 0.72630700  | 1.33891400  |
| N | -1.64634600 | 0.40394800  | 0.96694200  |
| H | -0.98028600 | -0.31819500 | 1.28071800  |
| H | -1.94999900 | -0.05251900 | -0.19031800 |
| C | -6.59602600 | -0.81883900 | -0.61964800 |
| C | -5.48588700 | -0.13327600 | -1.11928800 |
| C | -4.42062100 | -0.82673000 | -1.70666200 |
| C | -4.48427300 | -2.22623600 | -1.79001300 |
| C | -5.59035700 | -2.91102900 | -1.28610800 |
| C | -6.64907800 | -2.21061200 | -0.70075300 |
| H | -7.41599200 | -0.26548700 | -0.16978900 |
| H | -5.45144300 | 0.95273400  | -1.06069200 |
| H | -3.66461700 | -2.77490100 | -2.24833300 |
| H | -5.62943100 | -3.99488500 | -1.35736200 |
| H | -7.51139000 | -2.74713000 | -0.31404500 |
| C | -3.22473000 | -0.08028700 | -2.25568000 |
| H | -3.39662100 | 0.99908500  | -2.20789500 |
| H | -3.06234200 | -0.34932600 | -3.30674600 |
| N | -1.98029100 | -0.36938100 | -1.49159200 |
| H | -1.69884200 | -1.34927600 | -1.65877100 |



|   |             |            |             |
|---|-------------|------------|-------------|
| H | -1.21563400 | 0.19578400 | -1.87994200 |
|---|-------------|------------|-------------|

**Int3D**

|   |             |             |             |
|---|-------------|-------------|-------------|
| C | 6.89019700  | -0.61746800 | -0.73745500 |
| C | 5.58816300  | -0.87941200 | -0.31505900 |
| C | 5.35119900  | -1.49640800 | 0.92196800  |
| C | 6.44321900  | -1.84750100 | 1.72211200  |
| C | 7.74864300  | -1.59208500 | 1.29749200  |
| C | 7.97464300  | -0.97502500 | 0.06756400  |
| H | 7.05990600  | -0.13431400 | -1.69530400 |
| H | 4.74609500  | -0.59998700 | -0.94300800 |
| H | 6.27079400  | -2.32255100 | 2.68455300  |
| H | 8.58627400  | -1.87006100 | 1.93050000  |
| H | 8.98896200  | -0.77075500 | -0.26234700 |
| C | 3.93776100  | -1.79678400 | 1.36946400  |
| H | 3.94191000  | -2.31396900 | 2.33711700  |
| H | 3.42912400  | -2.46485300 | 0.66689000  |
| N | 3.13450800  | -0.58026100 | 1.47220900  |
| H | 3.60783900  | 0.31976500  | 1.61588300  |
| C | 1.81170500  | -0.51690300 | 1.36214800  |
| S | 0.83253700  | -1.87634900 | 1.09259600  |
| C | 1.15805800  | 0.86375800  | 1.55030900  |
| C | 2.04275200  | 2.01698800  | 2.02506500  |
| O | 3.25470100  | 2.08823200  | 1.80657600  |
| C | 1.34929300  | 3.11586600  | 2.80565200  |
| H | 0.29205500  | 3.21075900  | 2.55533700  |
| H | 1.43628700  | 2.87656800  | 3.87477600  |
| H | 1.86204000  | 4.06441500  | 2.63574600  |
| H | 0.44137000  | 0.70395700  | 2.36332000  |
| C | 0.34113100  | 1.41884200  | 0.37288600  |
| C | 0.91474800  | 1.58091000  | -0.93724900 |
| C | 2.30116100  | 1.35928100  | -1.22123900 |
| C | 0.12619100  | 1.92230800  | -2.08803100 |
| C | 2.81274700  | 1.39962500  | -2.51123900 |
| H | 2.99276000  | 1.19856600  | -0.40735400 |
| C | 0.65474200  | 1.94433100  | -3.37927000 |
| H | -0.90002700 | 2.24142300  | -1.94426300 |
| C | 1.99925200  | 1.66187500  | -3.62260200 |
| H | 3.88040300  | 1.24022900  | -2.65145800 |

|   |             |             |             |
|---|-------------|-------------|-------------|
| H | 0.00016900  | 2.21776200  | -4.20452700 |
| H | 2.41147100  | 1.70196300  | -4.62588100 |
| C | -1.08179500 | 1.61188800  | 0.63958700  |
| C | -1.88656900 | 2.69316700  | 0.36262400  |
| H | -2.95425800 | 2.53199000  | 0.50068400  |
| C | -1.57873800 | 4.06599400  | -0.02534800 |
| C | -0.28559300 | 4.59666100  | -0.23518800 |
| C | -2.66619200 | 4.95891900  | -0.17738400 |
| C | -0.10315900 | 5.94135300  | -0.55260200 |
| H | 0.57648900  | 3.95135300  | -0.13923900 |
| C | -2.48099300 | 6.29682600  | -0.50668600 |
| H | -3.67576200 | 4.58380300  | -0.02206300 |
| C | -1.19207100 | 6.80263300  | -0.69583500 |
| H | 0.90652500  | 6.31571500  | -0.70089100 |
| H | -3.34464100 | 6.94830900  | -0.61339000 |
| H | -1.04099800 | 7.84659600  | -0.95477900 |
| S | 0.44763100  | -3.44916900 | -3.14473600 |
| O | -0.92147800 | -2.88260700 | -2.73598700 |
| C | 1.00418200  | -4.51689700 | -1.77434400 |
| H | 0.28290800  | -5.33230600 | -1.69631900 |
| H | 1.98976900  | -4.91967700 | -2.02342600 |
| H | 1.03787900  | -3.94219400 | -0.84475000 |
| C | 1.67073700  | -2.11561700 | -2.92448200 |
| H | 2.66182000  | -2.51433700 | -3.15746900 |
| H | 1.42672300  | -1.31261900 | -3.62269900 |
| H | 1.63455200  | -1.73956300 | -1.89912000 |
| C | -3.98242700 | -2.92608400 | 3.11907200  |
| C | -3.82253000 | -1.74337600 | 2.39732100  |
| C | -3.06837000 | -0.68430500 | 2.91977000  |
| C | -2.47902200 | -0.83646200 | 4.18127300  |
| C | -2.63862200 | -2.01760700 | 4.90646100  |
| C | -3.39076600 | -3.06638800 | 4.37579400  |
| H | -4.57250900 | -3.73669100 | 2.70097700  |
| H | -4.29272100 | -1.63723200 | 1.42336100  |
| H | -1.89662200 | -0.01961200 | 4.60075300  |
| H | -2.17864600 | -2.11734800 | 5.88540800  |
| H | -3.51785400 | -3.98607800 | 4.93955800  |
| C | -2.86768200 | 0.58600500  | 2.12472500  |
| H | -2.68678800 | 1.43670400  | 2.79669900  |

|   |             |             |             |
|---|-------------|-------------|-------------|
| H | -3.78638900 | 0.81269200  | 1.57128300  |
| N | -1.74407100 | 0.44733600  | 1.17491400  |
| H | -1.07992900 | -0.27139400 | 1.46446200  |
| H | -1.86558600 | -0.39556900 | -0.48562800 |
| C | -6.30198700 | -1.13395500 | -0.87863400 |
| C | -5.17949800 | -0.42322500 | -1.30821800 |
| C | -4.09487700 | -1.09029800 | -1.89018900 |
| C | -4.14706800 | -2.48406700 | -2.03961300 |
| C | -5.26592600 | -3.19277100 | -1.60344500 |
| C | -6.34523100 | -2.52093700 | -1.02402900 |
| H | -7.13851900 | -0.60460200 | -0.43248900 |
| H | -5.14761300 | 0.65747100  | -1.19515100 |
| H | -3.30744400 | -3.00765900 | -2.48933600 |
| H | -5.29820500 | -4.27186400 | -1.72171100 |
| H | -7.21719300 | -3.07601300 | -0.69088500 |
| C | -2.88736800 | -0.31090800 | -2.35450200 |
| H | -3.07608400 | 0.76349200  | -2.31123400 |
| H | -2.60893900 | -0.57704700 | -3.37720900 |
| N | -1.67948900 | -0.57700800 | -1.50675600 |
| H | -1.32663000 | -1.54361700 | -1.68437800 |
| H | -0.92008800 | 0.07472700  | -1.77591500 |

**Int4D**

|   |            |             |             |
|---|------------|-------------|-------------|
| C | 7.45224700 | -1.62766300 | 0.39937500  |
| C | 6.30578100 | -0.90054700 | 0.71696700  |
| C | 6.29275500 | 0.49642100  | 0.59914400  |
| C | 7.45050800 | 1.14781900  | 0.15949200  |
| C | 8.60061600 | 0.42216300  | -0.15555100 |
| C | 8.60343100 | -0.96764000 | -0.03653800 |
| H | 7.44943300 | -2.70973200 | 0.49537300  |
| H | 5.41029800 | -1.41560500 | 1.05465000  |
| H | 7.45052800 | 2.23068700  | 0.06492700  |
| H | 9.49205600 | 0.94243800  | -0.49386000 |
| H | 9.49732000 | -1.53420000 | -0.28097400 |
| C | 5.04741300 | 1.28213700  | 0.94325500  |
| H | 5.27660800 | 2.34635400  | 1.07135000  |
| H | 4.61644600 | 0.94653800  | 1.89358200  |
| N | 4.02697500 | 1.13451300  | -0.09351900 |
| H | 4.25527600 | 0.62844900  | -0.95480100 |

|   |             |             |             |
|---|-------------|-------------|-------------|
| C | 2.80571000  | 1.65605900  | -0.02746100 |
| S | 2.29641700  | 2.59289200  | 1.28904300  |
| C | 1.87637700  | 1.36437300  | -1.20481500 |
| C | 2.52558000  | 0.97824900  | -2.53848700 |
| O | 3.58726200  | 0.36073400  | -2.63925500 |
| C | 1.76736500  | 1.38762000  | -3.78319300 |
| H | 0.69641100  | 1.48478000  | -3.60216900 |
| H | 2.14318800  | 2.37369100  | -4.08880700 |
| H | 1.97283600  | 0.68360000  | -4.59192700 |
| H | 1.31088600  | 2.27653400  | -1.38772800 |
| C | 0.83238300  | 0.25612800  | -0.92069900 |
| C | 1.27608600  | -0.92497500 | -0.14290900 |
| C | 2.38876800  | -1.72608600 | -0.48142400 |
| C | 0.62414500  | -1.23517100 | 1.07052300  |
| C | 2.81629400  | -2.76860400 | 0.34372400  |
| H | 2.92777000  | -1.53408200 | -1.40181400 |
| C | 1.03863300  | -2.28315100 | 1.88879800  |
| H | -0.18745000 | -0.59219300 | 1.39145600  |
| C | 2.14753500  | -3.05896200 | 1.53411200  |
| H | 3.67613600  | -3.36323300 | 0.04436000  |
| H | 0.50210300  | -2.48863900 | 2.81164100  |
| H | 2.48943000  | -3.86397500 | 2.17932900  |
| C | -0.49971500 | 0.45842400  | -1.31380100 |
| C | -1.52019400 | -0.51776900 | -1.55128400 |
| H | -2.51238400 | -0.07285600 | -1.66193100 |
| C | -1.42889600 | -1.81710200 | -2.19353000 |
| C | -0.23146000 | -2.43735400 | -2.63706900 |
| C | -2.63066200 | -2.52627600 | -2.47957100 |
| C | -0.24502500 | -3.65473800 | -3.31503000 |
| H | 0.71092500  | -1.93224900 | -2.47797100 |
| C | -2.63713500 | -3.74331600 | -3.15477400 |
| H | -3.57980500 | -2.06896600 | -2.20411800 |
| C | -1.43951100 | -4.33222200 | -3.57687000 |
| H | 0.69953400  | -4.07687900 | -3.65089000 |
| H | -3.58751100 | -4.22717400 | -3.37224700 |
| H | -1.44040700 | -5.27896500 | -4.10859600 |
| S | -1.33974100 | 1.34133900  | 4.17306900  |
| O | -2.04019600 | 0.58228800  | 3.04055000  |
| C | -0.88142700 | 2.97665500  | 3.50835200  |

|   |             |             |             |
|---|-------------|-------------|-------------|
| H | -1.80977100 | 3.48849800  | 3.24926200  |
| H | -0.35901900 | 3.53365600  | 4.29088700  |
| H | -0.24539600 | 2.86004400  | 2.62716600  |
| C | 0.35272100  | 0.67609800  | 4.32661400  |
| H | 0.86922800  | 1.23990600  | 5.10815100  |
| H | 0.26129900  | -0.36934800 | 4.62575900  |
| H | 0.88365100  | 0.75954600  | 3.37522800  |
| C | -0.80223400 | 6.33394600  | -1.44298700 |
| C | -0.49195100 | 5.04391200  | -1.01284200 |
| C | -1.49992300 | 4.08578700  | -0.83704900 |
| C | -2.82644600 | 4.45287000  | -1.09805900 |
| C | -3.14026300 | 5.74206600  | -1.53281200 |
| C | -2.12771000 | 6.68611600  | -1.70760400 |
| H | -0.00982300 | 7.06678200  | -1.56803100 |
| H | 0.53807300  | 4.77557700  | -0.79263400 |
| H | -3.62003100 | 3.72309100  | -0.95321100 |
| H | -4.17459100 | 6.01037800  | -1.73080500 |
| H | -2.36955200 | 7.69102200  | -2.04219900 |
| C | -1.16000500 | 2.67694800  | -0.40266100 |
| H | -1.97231000 | 2.27746400  | 0.22743500  |
| H | -0.25136500 | 2.68125600  | 0.20438400  |
| N | -0.91725600 | 1.80711300  | -1.57286500 |
| H | -1.73794400 | 1.80333000  | -2.16950900 |
| H | -2.26298600 | -1.02696500 | 0.15794500  |
| C | -6.38310100 | 0.90883000  | -0.99796000 |
| C | -5.67853900 | -0.22787200 | -0.59834100 |
| C | -4.90456800 | -0.21689800 | 0.56816600  |
| C | -4.84713700 | 0.95573200  | 1.33557400  |
| C | -5.54830300 | 2.09244800  | 0.93350200  |
| C | -6.31965700 | 2.07224800  | -0.23157300 |
| H | -6.97845400 | 0.88327200  | -1.90567000 |
| H | -5.73573800 | -1.13336700 | -1.19681900 |
| H | -4.24063700 | 0.98170900  | 2.23667400  |
| H | -5.49675600 | 2.99586400  | 1.53410000  |
| H | -6.86877500 | 2.95782400  | -0.53757700 |
| C | -4.18949300 | -1.47353000 | 1.00941900  |
| H | -4.39871200 | -2.29359500 | 0.32022800  |
| H | -4.51748500 | -1.78643200 | 2.00504000  |
| N | -2.69950100 | -1.34589800 | 1.07995500  |

|   |             |             |             |
|---|-------------|-------------|-------------|
| H | -2.40983300 | -0.67549500 | 1.81368900  |
| H | -2.31823700 | -2.29139500 | 1.31751600  |
| S | -1.92494400 | -5.29096300 | 1.30848700  |
| O | -2.21661800 | -3.91052700 | 1.91221900  |
| C | -0.58755400 | -5.10568000 | 0.08717700  |
| H | 0.30976900  | -4.80738700 | 0.63076300  |
| H | -0.43303700 | -6.07322700 | -0.39781400 |
| H | -0.83999600 | -4.34118100 | -0.65035400 |
| C | -3.26937600 | -5.64729800 | 0.12398700  |
| H | -3.09312500 | -6.62869500 | -0.32426400 |
| H | -4.20060600 | -5.66427400 | 0.69316100  |
| H | -3.29466500 | -4.87569000 | -0.64976500 |

**TS3D**

|   |             |             |             |
|---|-------------|-------------|-------------|
| C | -7.41100500 | 1.51957100  | 0.29443700  |
| C | -6.26451400 | 0.80767400  | 0.64509300  |
| C | -6.23181200 | -0.58942400 | 0.53297900  |
| C | -7.36961100 | -1.25655800 | 0.06547400  |
| C | -8.51958400 | -0.54607800 | -0.28255100 |
| C | -8.54215900 | 0.84405400  | -0.16908200 |
| H | -7.42385700 | 2.60188300  | 0.38646800  |
| H | -5.38496900 | 1.33556000  | 1.00419500  |
| H | -7.35429200 | -2.33969100 | -0.02460700 |
| H | -9.39550000 | -1.07834300 | -0.64198500 |
| H | -9.43608000 | 1.39880600  | -0.43903200 |
| C | -4.98675100 | -1.35978100 | 0.91077800  |
| H | -5.20652300 | -2.42575700 | 1.03940600  |
| H | -4.58069400 | -1.01402700 | 1.86851400  |
| N | -3.94487200 | -1.20821800 | -0.10459900 |
| H | -4.15653700 | -0.69453100 | -0.96411200 |
| C | -2.73283900 | -1.74888900 | -0.02459900 |
| S | -2.25526600 | -2.71316600 | 1.28018400  |
| C | -1.77578000 | -1.45361500 | -1.17972500 |
| C | -2.40706100 | -1.11144800 | -2.53774700 |
| O | -3.46264600 | -0.49426400 | -2.66666300 |
| C | -1.63595900 | -1.57368200 | -3.75366900 |
| H | -0.56080500 | -1.59823300 | -3.56848100 |
| H | -1.95102200 | -2.60275400 | -3.97398400 |
| H | -1.88461900 | -0.94865900 | -4.61315500 |

|   |             |             |             |
|---|-------------|-------------|-------------|
| H | -1.18965400 | -2.35674500 | -1.33202200 |
| C | -0.76673800 | -0.31284100 | -0.87949300 |
| C | -1.28186600 | 0.86978900  | -0.13347000 |
| C | -2.33517700 | 1.68910300  | -0.58596900 |
| C | -0.76602500 | 1.13845300  | 1.15031000  |
| C | -2.83980700 | 2.72480500  | 0.20344300  |
| H | -2.77355700 | 1.51224500  | -1.56112100 |
| C | -1.25533400 | 2.18303300  | 1.93320200  |
| H | 0.00130200  | 0.48158100  | 1.54528600  |
| C | -2.30402300 | 2.98100200  | 1.46722600  |
| H | -3.65341200 | 3.33668100  | -0.17801700 |
| H | -0.82413800 | 2.36805200  | 2.91328600  |
| H | -2.70170500 | 3.78365600  | 2.08276800  |
| C | 0.56643300  | -0.47018100 | -1.22589100 |
| C | 1.59626300  | 0.56611800  | -1.32573200 |
| H | 2.57425000  | 0.10523500  | -1.50131400 |
| C | 1.48256900  | 1.79749900  | -2.13085100 |
| C | 0.29452600  | 2.29348300  | -2.71196300 |
| C | 2.65884600  | 2.55014800  | -2.38314500 |
| C | 0.28571200  | 3.45577400  | -3.48455600 |
| H | -0.62436400 | 1.73831800  | -2.58261000 |
| C | 2.64834100  | 3.71031000  | -3.15337300 |
| H | 3.60589000  | 2.17963800  | -1.99561200 |
| C | 1.45513900  | 4.18408000  | -3.70941900 |
| H | -0.65185200 | 3.78853400  | -3.92394500 |
| H | 3.58185300  | 4.23817100  | -3.33723800 |
| H | 1.44276900  | 5.08542900  | -4.31503400 |
| S | 1.20524100  | -1.41855300 | 4.23723900  |
| O | 1.78922900  | -0.63072200 | 3.06280300  |
| C | 0.82294100  | -3.08886200 | 3.60944700  |
| H | 1.77275200  | -3.55176500 | 3.33609200  |
| H | 0.34823500  | -3.66491500 | 4.40838500  |
| H | 0.16707300  | -3.01492900 | 2.73793700  |
| C | -0.52040200 | -0.86406500 | 4.46428400  |
| H | -0.97227400 | -1.45764600 | 5.26361400  |
| H | -0.48243400 | 0.18533300  | 4.76169100  |
| H | -1.07809500 | -0.97931100 | 3.53145800  |
| C | 1.21228000  | -6.31605400 | -1.66698400 |
| C | 0.79333300  | -5.07700800 | -1.18263200 |

|   |             |             |             |
|---|-------------|-------------|-------------|
| C | 1.72168700  | -4.06387900 | -0.90779200 |
| C | 3.08110700  | -4.32256200 | -1.12669700 |
| C | 3.50393600  | -5.56011900 | -1.61554400 |
| C | 2.56963800  | -6.56015100 | -1.88782800 |
| H | 0.48026100  | -7.09325500 | -1.86852100 |
| H | -0.26210700 | -4.89347900 | -0.99895800 |
| H | 3.81339500  | -3.54938200 | -0.90503000 |
| H | 4.56222500  | -5.74487400 | -1.77886300 |
| H | 2.89662100  | -7.52534400 | -2.26420700 |
| C | 1.26624600  | -2.70937400 | -0.41166300 |
| H | 2.01652900  | -2.29411800 | 0.27971700  |
| H | 0.33404100  | -2.80709300 | 0.14988100  |
| N | 1.02617000  | -1.78859600 | -1.54907000 |
| H | 1.87468300  | -1.72438700 | -2.10192700 |
| H | 2.05371300  | 1.05139700  | 0.07160100  |
| C | 6.52716900  | -0.49416500 | -0.68636900 |
| C | 5.72275000  | 0.58514200  | -0.31640900 |
| C | 4.79578400  | 0.46770400  | 0.72647700  |
| C | 4.68916200  | -0.75804700 | 1.40015500  |
| C | 5.48999900  | -1.83819900 | 1.02776200  |
| C | 6.41227600  | -1.71063500 | -0.01429500 |
| H | 7.23948800  | -0.38308200 | -1.49865200 |
| H | 5.82015900  | 1.53170600  | -0.84212600 |
| H | 3.97166200  | -0.86978700 | 2.20861100  |
| H | 5.39774100  | -2.78225800 | 1.55727800  |
| H | 7.03733400  | -2.55264900 | -0.29708000 |
| C | 3.97557100  | 1.66881400  | 1.14718800  |
| H | 4.17457300  | 2.50876300  | 0.47833800  |
| H | 4.26201200  | 1.98867100  | 2.15610900  |
| N | 2.50380900  | 1.44728800  | 1.13777800  |
| H | 2.22947600  | 0.76867300  | 1.85902500  |
| H | 2.05899800  | 2.35517500  | 1.36073500  |
| S | 1.57042300  | 5.42850800  | 1.23191400  |
| O | 1.90205000  | 4.10053200  | 1.91482200  |
| C | 0.33970900  | 5.09824800  | -0.07131200 |
| H | -0.57630100 | 4.77474000  | 0.42441000  |
| H | 0.16338100  | 6.02343500  | -0.62640100 |
| H | 0.69318000  | 4.30896200  | -0.73786100 |
| C | 2.96670400  | 5.82722200  | 0.11941600  |



|   |            |            |             |
|---|------------|------------|-------------|
| H | 2.75426700 | 6.77024300 | -0.39141800 |
| H | 3.85309000 | 5.93897900 | 0.74654500  |
| H | 3.10260200 | 5.02240700 | -0.60734400 |

**Int5D**

|   |            |             |             |
|---|------------|-------------|-------------|
| C | 7.61988300 | 1.82406000  | 0.67359100  |
| C | 6.49378300 | 1.36991300  | -0.01163000 |
| C | 6.57696800 | 0.25369100  | -0.85622000 |
| C | 7.80848200 | -0.39478400 | -1.00026700 |
| C | 8.93788500 | 0.06108500  | -0.31812200 |
| C | 8.84530900 | 1.17143100  | 0.52099200  |
| H | 7.54264800 | 2.69100000  | 1.32349700  |
| H | 5.54228900 | 1.88044600  | 0.11040900  |
| H | 7.88344100 | -1.26071800 | -1.65297200 |
| H | 9.88743100 | -0.45131800 | -0.44239400 |
| H | 9.72292200 | 1.52823600  | 1.05216500  |
| C | 5.35537900 | -0.23666700 | -1.59987700 |
| H | 5.63188100 | -0.94863100 | -2.38634100 |
| H | 4.83704600 | 0.58756200  | -2.10304800 |
| N | 4.40518600 | -0.87549500 | -0.68859900 |
| H | 4.69483600 | -1.06244700 | 0.27208300  |
| C | 3.21038700 | -1.33453600 | -1.05578600 |
| S | 2.63233600 | -1.24570300 | -2.63338600 |
| C | 2.34787800 | -1.95239500 | 0.05055300  |
| C | 3.09786000 | -2.65405100 | 1.19843600  |
| O | 4.16630200 | -2.25716800 | 1.64701400  |
| C | 2.42178700 | -3.88151700 | 1.76223000  |
| H | 1.33743200 | -3.75133200 | 1.80556500  |
| H | 2.61497400 | -4.71934400 | 1.07916000  |
| H | 2.84121500 | -4.12346000 | 2.73998000  |
| H | 1.73726500 | -2.71278300 | -0.42964100 |
| C | 1.37373300 | -0.93628500 | 0.69447500  |
| C | 1.88321100 | 0.43322600  | 1.01313800  |
| C | 2.87897100 | 0.68198200  | 1.97268100  |
| C | 1.34560100 | 1.52802800  | 0.31188400  |
| C | 3.32073300 | 1.98356200  | 2.21931100  |
| H | 3.30899500 | -0.14004000 | 2.53332300  |
| C | 1.78874100 | 2.82870200  | 0.55725100  |
| H | 0.56145400 | 1.34449300  | -0.41675500 |

|   |             |             |             |
|---|-------------|-------------|-------------|
| C | 2.78191600  | 3.06044100  | 1.51219500  |
| H | 4.08486300  | 2.15426200  | 2.97259400  |
| H | 1.35128500  | 3.65427900  | 0.00214300  |
| H | 3.12856100  | 4.07141500  | 1.70753300  |
| C | 0.07299600  | -1.26986200 | 0.89229300  |
| C | -0.90691200 | -0.38883800 | 1.65494100  |
| H | -1.66506600 | -0.02394200 | 0.95115400  |
| C | -1.59043500 | -1.12362700 | 2.79887100  |
| C | -0.84409100 | -1.57239900 | 3.89945800  |
| C | -2.97023000 | -1.36233100 | 2.78364000  |
| C | -1.46114800 | -2.23803800 | 4.95676400  |
| H | 0.22793800  | -1.39299500 | 3.92278900  |
| C | -3.59109500 | -2.02998500 | 3.84293700  |
| H | -3.56592200 | -1.01242400 | 1.94434300  |
| C | -2.83922200 | -2.46984300 | 4.93139300  |
| H | -0.86839900 | -2.57486400 | 5.80274700  |
| H | -4.66329000 | -2.20176500 | 3.81380600  |
| H | -3.32074100 | -2.98809900 | 5.75561300  |
| S | -1.46551600 | 1.57289100  | -3.14068600 |
| O | -1.62893300 | 0.91960700  | -1.76225600 |
| C | -0.64192700 | 0.33153300  | -4.19694400 |
| H | -1.35754700 | -0.47587700 | -4.36279000 |
| H | -0.37345800 | 0.78993200  | -5.15235400 |
| H | 0.24101600  | -0.05213100 | -3.67840800 |
| C | -0.07624600 | 2.75200300  | -3.02896100 |
| H | 0.07495000  | 3.20304300  | -4.01371600 |
| H | -0.36554500 | 3.51749500  | -2.30380200 |
| H | 0.82502400  | 2.22895200  | -2.70072400 |
| C | -2.10676500 | -6.08802200 | -1.30133800 |
| C | -1.32734700 | -4.98090200 | -0.96798900 |
| C | -1.70579500 | -3.69163000 | -1.36869800 |
| C | -2.88632700 | -3.54067700 | -2.10684900 |
| C | -3.66590200 | -4.64813800 | -2.44776000 |
| C | -3.27815400 | -5.92594300 | -2.04466100 |
| H | -1.79906900 | -7.07997100 | -0.98218000 |
| H | -0.42022400 | -5.10835000 | -0.38492000 |
| H | -3.19580300 | -2.54594000 | -2.41809400 |
| H | -4.57750600 | -4.51014200 | -3.02233300 |
| H | -3.88435600 | -6.78897200 | -2.30441700 |

|   |             |             |             |
|---|-------------|-------------|-------------|
| C | -0.85685700 | -2.48555100 | -1.03231400 |
| H | -1.39065600 | -1.56397200 | -1.30037000 |
| H | 0.06044300  | -2.48858600 | -1.63294800 |
| N | -0.47654800 | -2.49183900 | 0.40755700  |
| H | -1.30628700 | -2.72029200 | 0.94971900  |
| H | -0.38923200 | 0.48843000  | 2.04716000  |
| C | -7.35679900 | 0.52582300  | 0.55112400  |
| C | -6.73764700 | 1.64274700  | -0.01465800 |
| C | -5.54076400 | 1.51730700  | -0.72743400 |
| C | -4.96999600 | 0.24224100  | -0.85952300 |
| C | -5.58389600 | -0.87628100 | -0.29415000 |
| C | -6.78183000 | -0.73742100 | 0.41252200  |
| H | -8.28781600 | 0.64363100  | 1.09880400  |
| H | -7.19062400 | 2.62481600  | 0.09790500  |
| H | -4.03088900 | 0.13501000  | -1.39759500 |
| H | -5.13137800 | -1.85739400 | -0.41347400 |
| H | -7.26408900 | -1.60853500 | 0.84711600  |
| C | -4.85810300 | 2.72073500  | -1.34737400 |
| H | -5.53749200 | 3.58027700  | -1.30972500 |
| H | -4.68050700 | 2.50752500  | -2.41576800 |
| N | -3.62445700 | 3.06959200  | -0.62147500 |
| H | -2.97305900 | 2.28556100  | -0.69475100 |
| H | -3.13795800 | 3.83685500  | -1.08674600 |
| S | -1.26758800 | 5.52068800  | 0.70077900  |
| O | -1.14525100 | 4.96235100  | -0.71571500 |
| C | -1.60804000 | 4.12018800  | 1.82774200  |
| H | -0.71126900 | 3.49835000  | 1.84221400  |
| H | -1.80302200 | 4.51423500  | 2.82915300  |
| H | -2.46347200 | 3.56103600  | 1.43608300  |
| C | -2.92972400 | 6.28134000  | 0.82330000  |
| H | -3.07515400 | 6.66681800  | 1.83590100  |
| H | -2.95997300 | 7.10301900  | 0.10555400  |
| H | -3.67952900 | 5.52560400  | 0.57873700  |

**TS4'D**

|   |            |             |             |
|---|------------|-------------|-------------|
| C | 6.94885600 | -0.61614600 | -1.12297200 |
| C | 5.77563100 | -0.28312200 | -0.44868000 |
| C | 5.44381700 | 1.05834600  | -0.21286200 |
| C | 6.31247800 | 2.05636300  | -0.66530400 |

|   |             |             |             |
|---|-------------|-------------|-------------|
| C | 7.49157700  | 1.72553300  | -1.33608500 |
| C | 7.81215500  | 0.38829800  | -1.56748500 |
| H | 7.19223600  | -1.65998100 | -1.30009900 |
| H | 5.10517300  | -1.06512200 | -0.10261800 |
| H | 6.06284500  | 3.10024100  | -0.49331200 |
| H | 8.15461700  | 2.51321800  | -1.68223700 |
| H | 8.72709300  | 0.12872100  | -2.09211000 |
| C | 4.18650400  | 1.41601200  | 0.54911200  |
| H | 4.06549600  | 2.50676600  | 0.60772400  |
| H | 4.23729100  | 1.06787100  | 1.58839000  |
| N | 3.00421800  | 0.82154700  | -0.05437800 |
| H | 2.86174500  | 0.80278100  | -1.11862000 |
| C | 1.84434700  | 0.70169400  | 0.59418100  |
| S | 1.53283200  | 1.23472500  | 2.16504300  |
| C | 0.73645000  | 0.14680400  | -0.26355800 |
| C | 0.76565100  | 0.52510400  | -1.70783000 |
| O | 1.87380600  | 0.90835500  | -2.28872500 |
| C | -0.22609400 | -0.15474200 | -2.66433000 |
| H | -1.24421000 | -0.23222200 | -2.28494000 |
| H | -0.22249800 | 0.41322600  | -3.59638300 |
| H | 0.14850600  | -1.15986200 | -2.88319800 |
| H | 0.15647400  | 1.45217000  | -1.21812300 |
| C | -0.24367800 | -0.73152200 | 0.36213300  |
| C | 0.40905800  | -1.81484300 | 1.17150800  |
| C | 1.40097800  | -2.61918500 | 0.58452800  |
| C | 0.06168300  | -2.05719200 | 2.51121900  |
| C | 2.02216300  | -3.63657800 | 1.31046400  |
| H | 1.67805100  | -2.45117600 | -0.45231000 |
| C | 0.67227000  | -3.07966300 | 3.23247200  |
| H | -0.67143900 | -1.41667900 | 2.99006000  |
| C | 1.65691100  | -3.87194500 | 2.63539800  |
| H | 2.78466400  | -4.24829800 | 0.83702100  |
| H | 0.39238800  | -3.24905800 | 4.26820600  |
| H | 2.13660300  | -4.66460700 | 3.20203900  |
| C | -1.62201700 | -0.71200500 | 0.23997100  |
| C | -2.48480400 | -1.93129700 | 0.56920100  |
| H | -2.95060600 | -1.78518900 | 1.55141600  |
| C | -3.57518900 | -2.18781600 | -0.45836500 |
| C | -3.25476500 | -2.71733700 | -1.71774500 |

|   |             |             |             |
|---|-------------|-------------|-------------|
| C | -4.91639900 | -1.89982900 | -0.17461600 |
| C | -4.24876800 | -2.95018000 | -2.66582500 |
| H | -2.21892700 | -2.94898200 | -1.95084900 |
| C | -5.91511600 | -2.13063400 | -1.12496800 |
| H | -5.18352800 | -1.50482700 | 0.80276800  |
| C | -5.58331700 | -2.65584900 | -2.37260800 |
| H | -3.98352300 | -3.36476000 | -3.63401500 |
| H | -6.94988900 | -1.90453400 | -0.88486400 |
| H | -6.35743600 | -2.83952400 | -3.11158900 |
| C | -5.03580000 | 3.99698700  | -0.46040300 |
| C | -3.91802300 | 3.21150300  | -0.74743700 |
| C | -3.14919400 | 2.66231700  | 0.28555500  |
| C | -3.51541800 | 2.91558300  | 1.61409400  |
| C | -4.62888100 | 3.70352100  | 1.90273900  |
| C | -5.39252500 | 4.24412100  | 0.86552800  |
| H | -5.62143600 | 4.42048900  | -1.27101100 |
| H | -3.63442600 | 3.03033800  | -1.78136100 |
| H | -2.91817500 | 2.49976200  | 2.42123900  |
| H | -4.89799200 | 3.90004900  | 2.93639200  |
| H | -6.25794500 | 4.86032300  | 1.09082300  |
| C | -1.95777600 | 1.78291500  | -0.02701400 |
| H | -1.18354100 | 1.88001100  | 0.74159400  |
| H | -1.50143900 | 2.10790400  | -0.98150400 |
| N | -2.35927900 | 0.38739200  | -0.09020700 |
| H | -3.33352200 | 0.22098600  | -0.30760100 |
| H | -1.83959100 | -2.80635400 | 0.65016600  |

**Int5WD**

|   |            |             |             |
|---|------------|-------------|-------------|
| C | 7.00664000 | 0.67568000  | -0.39732200 |
| C | 5.83767800 | 0.25683100  | -1.03496500 |
| C | 5.01212000 | -0.70918400 | -0.44936400 |
| C | 5.37305000 | -1.24931300 | 0.79424800  |
| C | 6.53783800 | -0.82568600 | 1.43375600  |
| C | 7.35907800 | 0.13501300  | 0.83923200  |
| H | 7.63920900 | 1.42397300  | -0.86607300 |
| H | 5.56284700 | 0.68286700  | -1.99631500 |
| H | 4.73711900 | -1.99635200 | 1.26356600  |
| H | 6.80876600 | -1.25148400 | 2.39578000  |
| H | 8.26855500 | 0.45895700  | 1.33693500  |

|   |             |             |             |
|---|-------------|-------------|-------------|
| C | 3.75609800  | -1.17435200 | -1.15135900 |
| H | 3.73218400  | -2.26655000 | -1.24572500 |
| H | 3.70541700  | -0.77693900 | -2.17093400 |
| N | 2.55656000  | -0.75609100 | -0.42322600 |
| H | 2.67353600  | -0.20029100 | 0.42109700  |
| C | 1.32050200  | -1.14765400 | -0.72252200 |
| S | 0.95863600  | -2.17949800 | -2.00320200 |
| C | 0.19305100  | -0.57976400 | 0.14369800  |
| C | 0.49117300  | -0.43369100 | 1.64073900  |
| O | 1.61410700  | -0.18151800 | 2.08030800  |
| C | -0.68034100 | -0.63270600 | 2.56325500  |
| H | -1.60395800 | -0.24420300 | 2.12815300  |
| H | -0.80580000 | -1.71787000 | 2.66300200  |
| H | -0.47376900 | -0.19199300 | 3.54014400  |
| H | -0.62356900 | -1.29090700 | 0.08472600  |
| C | -0.33466800 | 0.77089800  | -0.38587700 |
| C | 0.67259600  | 1.82516800  | -0.72177300 |
| C | 1.29173600  | 2.59885300  | 0.27394400  |
| C | 1.03476900  | 2.04811800  | -2.06081300 |
| C | 2.23744100  | 3.56941500  | -0.06050200 |
| H | 1.03298200  | 2.44064900  | 1.31614900  |
| C | 1.97758100  | 3.02050100  | -2.39505100 |
| H | 0.57263200  | 1.44635900  | -2.83749800 |
| C | 2.58243800  | 3.78417200  | -1.39541500 |
| H | 2.70188800  | 4.15980400  | 0.72403700  |
| H | 2.23962300  | 3.18008700  | -3.43715300 |
| H | 3.31672200  | 4.54132700  | -1.65442700 |
| C | -1.66578100 | 0.95955500  | -0.55513800 |
| C | -2.26711100 | 2.29429400  | -0.97749500 |
| H | -2.79268400 | 2.15054600  | -1.93091100 |
| C | -3.24754800 | 2.84611800  | 0.04597700  |
| C | -2.78031200 | 3.39929500  | 1.24764300  |
| C | -4.62951700 | 2.80238200  | -0.17560100 |
| C | -3.67020700 | 3.89738200  | 2.19713400  |
| H | -1.70995600 | 3.44292500  | 1.43158600  |
| C | -5.52503800 | 3.29753300  | 0.77620600  |
| H | -5.00852500 | 2.38984500  | -1.10773100 |
| C | -5.04743700 | 3.84607000  | 1.96523500  |
| H | -3.29015800 | 4.32800900  | 3.11922100  |

|   |             |             |             |
|---|-------------|-------------|-------------|
| H | -6.59330700 | 3.25663200  | 0.58408300  |
| H | -5.74068700 | 4.23400800  | 2.70564900  |
| C | -4.28856000 | -4.09454700 | 0.41802900  |
| C | -3.39190200 | -3.11669600 | -0.00873100 |
| C | -3.78923100 | -2.14406200 | -0.93848800 |
| C | -5.10028000 | -2.17505100 | -1.42584600 |
| C | -6.00106800 | -3.15387400 | -0.99941200 |
| C | -5.59619200 | -4.11561000 | -0.07493100 |
| H | -3.96431700 | -4.84545900 | 1.13277500  |
| H | -2.37619900 | -3.11599600 | 0.37778700  |
| H | -5.41724200 | -1.42963800 | -2.15187600 |
| H | -7.01434800 | -3.16465500 | -1.39102400 |
| H | -6.29235800 | -4.88033700 | 0.25758400  |
| C | -2.82398600 | -1.07033300 | -1.39117400 |
| H | -3.21115000 | -0.59116300 | -2.30507000 |
| H | -1.85716300 | -1.51093200 | -1.65257200 |
| N | -2.60524700 | -0.08116700 | -0.30520300 |
| H | -3.50259200 | 0.31883300  | -0.04302000 |
| H | -1.47296200 | 3.02165400  | -1.15594000 |
| O | 2.78285500  | -2.78316300 | 2.54573200  |
| H | 2.85706700  | -3.06695000 | 3.46562400  |
| H | 2.53269600  | -1.84378200 | 2.58741100  |
| O | 0.30785700  | -3.50370100 | 1.30046900  |
| H | 1.19831700  | -3.44749900 | 1.69565700  |
| H | 0.46761200  | -3.59217300 | 0.34953300  |

**TS4WD**

|   |            |             |             |
|---|------------|-------------|-------------|
| C | 7.53987900 | -0.05413500 | 0.94386100  |
| C | 6.48984500 | 0.21813300  | 0.06506100  |
| C | 5.41087700 | -0.66442800 | -0.05391700 |
| C | 5.39777500 | -1.82902700 | 0.72830500  |
| C | 6.44326000 | -2.09870900 | 1.61041300  |
| C | 7.51798900 | -1.21306300 | 1.71945500  |
| H | 8.37163700 | 0.63987300  | 1.02313600  |
| H | 6.50816600 | 1.12342100  | -0.53625500 |
| H | 4.56345500 | -2.52118800 | 0.64511600  |
| H | 6.42254900 | -3.00401900 | 2.21046500  |
| H | 8.33337000 | -1.42661400 | 2.40444600  |
| C | 4.28164000 | -0.37645100 | -1.01785700 |

|   |             |             |             |
|---|-------------|-------------|-------------|
| H | 4.11992100  | -1.21235100 | -1.70835100 |
| H | 4.51527900  | 0.49344700  | -1.64171000 |
| N | 3.02737600  | -0.13582400 | -0.30232400 |
| H | 3.06242300  | -0.09293400 | 0.71355200  |
| C | 1.81119600  | -0.14283100 | -0.85260400 |
| S | 1.60643200  | -0.43069300 | -2.52845500 |
| C | 0.62261500  | 0.03229800  | 0.03898500  |
| C | 0.75474000  | -0.17571800 | 1.46392900  |
| O | 1.71604700  | -0.82247300 | 1.98174900  |
| C | -0.33716400 | 0.27709400  | 2.41308300  |
| H | -0.65331500 | 1.30648700  | 2.23270300  |
| H | -1.22255600 | -0.35271500 | 2.27457100  |
| H | 0.02718600  | 0.16370500  | 3.43511400  |
| H | 0.09527400  | -1.42391700 | -0.27246400 |
| C | -0.39450200 | 1.03017500  | -0.46588800 |
| C | 0.17376900  | 2.35264400  | -0.89068800 |
| C | 0.95888300  | 3.10591500  | -0.00242300 |
| C | -0.02860900 | 2.85760900  | -2.18502100 |
| C | 1.49297400  | 4.33739400  | -0.38192900 |
| H | 1.15078800  | 2.72529500  | 0.99690800  |
| C | 0.50974700  | 4.08560400  | -2.56863000 |
| H | -0.59412700 | 2.26457300  | -2.89632100 |
| C | 1.26884900  | 4.83342200  | -1.66718600 |
| H | 2.08677900  | 4.90794600  | 0.32683500  |
| H | 0.34511700  | 4.45254000  | -3.57777200 |
| H | 1.68976900  | 5.78897800  | -1.96620500 |
| C | -1.73080100 | 0.80907300  | -0.46758000 |
| C | -2.77860900 | 1.89171600  | -0.71876500 |
| H | -3.44820700 | 1.57111800  | -1.52702500 |
| C | -3.61006800 | 2.17963800  | 0.52258400  |
| C | -3.11686100 | 3.03480600  | 1.51986700  |
| C | -4.86577300 | 1.58837900  | 0.71413800  |
| C | -3.85675300 | 3.28978400  | 2.67339700  |
| H | -2.14824700 | 3.50826400  | 1.38060700  |
| C | -5.60819100 | 1.83818600  | 1.87150300  |
| H | -5.27440200 | 0.93729600  | -0.05528300 |
| C | -5.10534700 | 2.68915100  | 2.85466400  |
| H | -3.46120200 | 3.96081500  | 3.43071700  |
| H | -6.58072200 | 1.37130700  | 1.99916000  |



|   |             |             |             |
|---|-------------|-------------|-------------|
| H | -5.68232000 | 2.88817400  | 3.75298400  |
| C | -3.86725200 | -4.42279200 | 0.48207700  |
| C | -3.13643500 | -3.28744900 | 0.13269400  |
| C | -3.56409200 | -2.45629400 | -0.91206800 |
| C | -4.74106500 | -2.79044100 | -1.59335100 |
| C | -5.46973500 | -3.93062100 | -1.25119100 |
| C | -5.03515300 | -4.75042500 | -0.20960900 |
| H | -3.52367700 | -5.05521100 | 1.29619400  |
| H | -2.22800700 | -3.03391000 | 0.66751300  |
| H | -5.08968900 | -2.15128900 | -2.40114000 |
| H | -6.37965800 | -4.17262000 | -1.79303700 |
| H | -5.60285500 | -5.63524700 | 0.06353400  |
| C | -2.77277700 | -1.23019500 | -1.31925100 |
| H | -3.40677800 | -0.60479100 | -1.96859000 |
| H | -1.90923500 | -1.52046900 | -1.92782100 |
| N | -2.26164300 | -0.49126100 | -0.14281700 |
| H | -3.04308700 | -0.37067200 | 0.50183300  |
| H | -2.29966600 | 2.81208900  | -1.05239500 |
| O | 2.03113900  | -3.18534900 | 0.86186800  |
| H | 1.84634600  | -3.84624800 | 1.54160400  |
| H | 2.05364500  | -2.30322600 | 1.33749000  |
| O | 0.12427400  | -2.48193100 | -0.69476900 |
| H | 0.86880100  | -2.91512600 | -0.13255000 |
| H | 0.52342700  | -2.24473700 | -1.57344000 |

**Int6WD**

|   |            |             |             |
|---|------------|-------------|-------------|
| C | 7.59636800 | -0.09880000 | 0.85111400  |
| C | 6.53397600 | 0.12064000  | -0.02775400 |
| C | 5.46183400 | -0.77646300 | -0.08810800 |
| C | 5.46673000 | -1.90138000 | 0.75034700  |
| C | 6.52601300 | -2.11828600 | 1.63072400  |
| C | 7.59349500 | -1.21863900 | 1.68280500  |
| H | 8.42382100 | 0.60401400  | 0.88496700  |
| H | 6.53836900 | 0.99361200  | -0.67562200 |
| H | 4.63485900 | -2.59995600 | 0.70709700  |
| H | 6.52204300 | -2.99362100 | 2.27407900  |
| H | 8.41950500 | -1.39166300 | 2.36658300  |
| C | 4.31046300 | -0.54473100 | -1.04056400 |
| H | 4.07142900 | -1.45085900 | -1.60705300 |

|   |             |             |             |
|---|-------------|-------------|-------------|
| H | 4.56071600  | 0.22594200  | -1.77885900 |
| N | 3.10546100  | -0.14322800 | -0.31167100 |
| H | 3.21889500  | 0.08380300  | 0.66905900  |
| C | 1.86310700  | -0.14295800 | -0.81640900 |
| S | 1.56968600  | -0.53092600 | -2.43996400 |
| C | 0.75991900  | 0.23534400  | 0.10890800  |
| C | 0.76749100  | -0.06594000 | 1.44475800  |
| O | 1.70843800  | -0.82711100 | 2.05595200  |
| C | -0.24088300 | 0.41384100  | 2.44981700  |
| H | -0.87927100 | 1.21254000  | 2.07855000  |
| H | -0.87317900 | -0.42457500 | 2.76655700  |
| H | 0.29594400  | 0.75366500  | 3.34181800  |
| H | -0.59105400 | -2.06030900 | -0.26432600 |
| C | -0.32584000 | 1.09038800  | -0.46466800 |
| C | 0.13327400  | 2.44948300  | -0.90255700 |
| C | 0.83582600  | 3.28626000  | -0.02066200 |
| C | -0.08098400 | 2.89826400  | -2.21597200 |
| C | 1.27402700  | 4.54749300  | -0.42512600 |
| H | 1.03722400  | 2.94449300  | 0.99033000  |
| C | 0.36338200  | 4.15546400  | -2.62374100 |
| H | -0.57913800 | 2.23989700  | -2.92023900 |
| C | 1.03755000  | 4.98768100  | -1.72832000 |
| H | 1.80465000  | 5.18412100  | 0.27733300  |
| H | 0.19291800  | 4.48010700  | -3.64624300 |
| H | 1.38494000  | 5.96628100  | -2.04654100 |
| C | -1.62721700 | 0.71986000  | -0.52722900 |
| C | -2.76547900 | 1.71849500  | -0.74364900 |
| H | -3.48220800 | 1.33648100  | -1.47828000 |
| C | -3.49901100 | 2.01362300  | 0.55887200  |
| C | -3.04318300 | 3.03307300  | 1.40911500  |
| C | -4.62259900 | 1.27388800  | 0.95149400  |
| C | -3.69027200 | 3.30245700  | 2.61467800  |
| H | -2.17692500 | 3.62096000  | 1.11691100  |
| C | -5.27006000 | 1.53861100  | 2.16097100  |
| H | -5.00499300 | 0.48948300  | 0.30382500  |
| C | -4.80587800 | 2.55358300  | 2.99660000  |
| H | -3.32582700 | 4.10093500  | 3.25488200  |
| H | -6.14067400 | 0.95398100  | 2.44441600  |
| H | -5.31080600 | 2.76400400  | 3.93478500  |

|   |             |             |             |
|---|-------------|-------------|-------------|
| C | -4.07855200 | -4.62666800 | -0.16205700 |
| C | -3.18566600 | -3.63532600 | -0.56963700 |
| C | -3.65932000 | -2.39173800 | -1.01397000 |
| C | -5.04383100 | -2.17571900 | -1.05180000 |
| C | -5.93798700 | -3.16771800 | -0.64579800 |
| C | -5.45549800 | -4.39649200 | -0.19537900 |
| H | -3.69747400 | -5.58653800 | 0.17533300  |
| H | -2.11624500 | -3.82196800 | -0.56037000 |
| H | -5.42700000 | -1.22693400 | -1.42090200 |
| H | -7.00746300 | -2.98222700 | -0.68787100 |
| H | -6.14731000 | -5.17246100 | 0.11945600  |
| C | -2.70962700 | -1.29288700 | -1.44300400 |
| H | -3.27281800 | -0.55836300 | -2.03103500 |
| H | -1.92798000 | -1.68713600 | -2.09762100 |
| N | -2.02907600 | -0.65254700 | -0.26799200 |
| H | -2.69419400 | -0.65851600 | 0.50650400  |
| H | -2.37252500 | 2.65097400  | -1.14738700 |
| O | 2.16584100  | -3.10866600 | 0.82646300  |
| H | 2.00108100  | -3.76801700 | 1.51263300  |
| H | 1.98616300  | -1.62178900 | 1.51184700  |
| O | -0.03727500 | -2.78639200 | -0.63675200 |
| H | 1.34497300  | -3.10511800 | 0.25944600  |
| H | 0.35443400  | -2.36088000 | -1.42510600 |

**Int6'D**

|   |             |             |             |
|---|-------------|-------------|-------------|
| C | -7.16891800 | -0.20494500 | 1.26858900  |
| C | -6.12367900 | -0.40288700 | 0.36471900  |
| C | -5.32763500 | 0.67073000  | -0.05284500 |
| C | -5.59962700 | 1.94962500  | 0.45203900  |
| C | -6.64250600 | 2.15056100  | 1.35537000  |
| C | -7.42941000 | 1.07220300  | 1.76606900  |
| H | -7.78097100 | -1.04646700 | 1.57963400  |
| H | -5.92736200 | -1.39775200 | -0.02734600 |
| H | -4.99458400 | 2.79268000  | 0.12728300  |
| H | -6.84473700 | 3.14791600  | 1.73464400  |
| H | -8.24438500 | 1.22847400  | 2.46660200  |
| C | -4.18069800 | 0.44862800  | -1.01216300 |
| H | -4.06859400 | 1.28709000  | -1.70465900 |
| H | -4.34735400 | -0.44290800 | -1.62944400 |

|   |             |             |             |
|---|-------------|-------------|-------------|
| N | -2.91998100 | 0.30563600  | -0.27008900 |
| H | -3.02017900 | -0.11442300 | 0.64829300  |
| C | -1.70501600 | 0.09961400  | -0.88199900 |
| S | -1.54528800 | 0.14311100  | -2.54301900 |
| C | -0.56486800 | -0.11788600 | 0.04676900  |
| C | -0.44916300 | 0.60412200  | 1.20685600  |
| O | -1.28842200 | 1.61585800  | 1.56757200  |
| C | 0.64060700  | 0.45759800  | 2.22141500  |
| H | 1.08280000  | -0.53699100 | 2.18741900  |
| H | 1.44052200  | 1.17906100  | 2.02265100  |
| H | 0.23262000  | 0.65713700  | 3.21619000  |
| C | 0.45986300  | -1.12917100 | -0.34736000 |
| C | -0.07295000 | -2.50961700 | -0.54804700 |
| C | -0.86938500 | -3.10832700 | 0.44483700  |
| C | 0.15145300  | -3.23418800 | -1.73167200 |
| C | -1.39402500 | -4.38891400 | 0.27678100  |
| H | -1.06715700 | -2.56083900 | 1.36262000  |
| C | -0.36944600 | -4.51692000 | -1.90098600 |
| H | 0.71959200  | -2.76992000 | -2.53147100 |
| C | -1.14279100 | -5.10193000 | -0.89714600 |
| H | -1.99561600 | -4.83293600 | 1.06543100  |
| H | -0.18399700 | -5.05374700 | -2.82723300 |
| H | -1.55245400 | -6.09884800 | -1.03151500 |
| C | 1.78199700  | -0.82249800 | -0.50431700 |
| C | 2.86662500  | -1.88623400 | -0.65592900 |
| H | 3.31211000  | -1.79924500 | -1.65580600 |
| C | 3.97141300  | -1.76928600 | 0.38337100  |
| C | 3.73627800  | -2.15321200 | 1.71224700  |
| C | 5.23974400  | -1.28122800 | 0.04599800  |
| C | 4.73775400  | -2.04603300 | 2.67480700  |
| H | 2.76048700  | -2.54647700 | 1.98576800  |
| C | 6.24624900  | -1.16945700 | 1.00934900  |
| H | 5.44703000  | -0.99925900 | -0.98391500 |
| C | 5.99727700  | -1.55013500 | 2.32671400  |
| H | 4.53818200  | -2.35271500 | 3.69768500  |
| H | 7.22388400  | -0.78984700 | 0.72632700  |
| H | 6.77809600  | -1.46721100 | 3.07692800  |
| C | 2.23999400  | 4.85902500  | 0.46338600  |
| C | 1.72497300  | 3.62495900  | 0.06926000  |

|   |             |             |             |
|---|-------------|-------------|-------------|
| C | 2.33470000  | 2.89099400  | -0.95851600 |
| C | 3.46788000  | 3.42521800  | -1.58233900 |
| C | 3.98800100  | 4.66033600  | -1.18907100 |
| C | 3.37504200  | 5.37946900  | -0.16344200 |
| H | 1.75294200  | 5.41843700  | 1.25715600  |
| H | 0.83659900  | 3.22992900  | 0.55474300  |
| H | 3.94242100  | 2.87217200  | -2.38991300 |
| H | 4.86672800  | 5.06084400  | -1.68665600 |
| H | 3.77456500  | 6.34202600  | 0.14272200  |
| C | 1.79462500  | 1.53843700  | -1.37105200 |
| H | 2.08454000  | 1.32823400  | -2.41217400 |
| H | 0.70558800  | 1.53892600  | -1.35036600 |
| N | 2.28400400  | 0.48595500  | -0.46332700 |
| H | 3.29469000  | 0.50594500  | -0.39365200 |
| H | 2.41765600  | -2.87783200 | -0.59064400 |
| H | -1.98599200 | 1.70885600  | 0.89418200  |

**Int5aD**

|   |             |             |             |
|---|-------------|-------------|-------------|
| C | -7.45375600 | -1.36717300 | -0.38501600 |
| C | -6.29364500 | -1.07584800 | 0.33123700  |
| C | -5.46742500 | -2.10890400 | 0.79780200  |
| C | -5.83118500 | -3.43431500 | 0.53587600  |
| C | -6.99635100 | -3.72781200 | -0.17525300 |
| C | -7.80933100 | -2.69391600 | -0.63932300 |
| H | -8.08436400 | -0.55758200 | -0.74113300 |
| H | -6.02513300 | -0.04173200 | 0.53104700  |
| H | -5.19941700 | -4.24217700 | 0.89675900  |
| H | -7.26684100 | -4.76241000 | -0.36634900 |
| H | -8.71581900 | -2.91914100 | -1.19367400 |
| C | -4.21398900 | -1.79361700 | 1.58292300  |
| H | -3.74136200 | -2.71115000 | 1.95315500  |
| H | -4.44065300 | -1.19268300 | 2.47217500  |
| N | -3.25697000 | -1.04808300 | 0.76901100  |
| H | -3.44180700 | -0.91607800 | -0.22732400 |
| C | -2.11579700 | -0.54029900 | 1.23572600  |
| S | -1.61433500 | -0.71401500 | 2.82942000  |
| C | -1.26681800 | 0.27153100  | 0.24559800  |
| C | -1.47020200 | 0.02200700  | -1.25670200 |
| O | -2.51496200 | -0.41474000 | -1.73889900 |

|   |             |             |             |
|---|-------------|-------------|-------------|
| C | -0.30084100 | 0.35385600  | -2.14948300 |
| H | 0.30221900  | 1.17756700  | -1.76090400 |
| H | 0.32864900  | -0.54386300 | -2.20732000 |
| H | -0.66433000 | 0.57622100  | -3.15538900 |
| H | -0.23515700 | 0.00023500  | 0.46482600  |
| C | -1.45836400 | 1.78975300  | 0.44235000  |
| C | -2.88452300 | 2.23424600  | 0.60607400  |
| C | -3.73432200 | 2.41119900  | -0.49918100 |
| C | -3.41309600 | 2.46066200  | 1.88888300  |
| C | -5.06150100 | 2.81083700  | -0.32963800 |
| H | -3.35492000 | 2.23541700  | -1.50082300 |
| C | -4.73888800 | 2.86104100  | 2.06026600  |
| H | -2.77224600 | 2.31200900  | 2.75171200  |
| C | -5.56860700 | 3.03769900  | 0.95122600  |
| H | -5.69631600 | 2.95068100  | -1.20026200 |
| H | -5.12305900 | 3.03495000  | 3.06148700  |
| H | -6.59941500 | 3.35418100  | 1.08349300  |
| C | -0.44094900 | 2.69816300  | 0.44246200  |
| C | -0.73394100 | 4.19667900  | 0.53883100  |
| H | -0.34418800 | 4.56052500  | 1.49868900  |
| C | -0.11972200 | 5.01831300  | -0.58349600 |
| C | -0.53570700 | 4.83235500  | -1.91064000 |
| C | 0.85824000  | 5.98467700  | -0.32087400 |
| C | 0.01079000  | 5.59175600  | -2.94234100 |
| H | -1.29402300 | 4.08508300  | -2.12833200 |
| C | 1.41055300  | 6.74742200  | -1.35396300 |
| H | 1.18458700  | 6.14984500  | 0.70335100  |
| C | 0.98829600  | 6.55286400  | -2.66756100 |
| H | -0.32621500 | 5.43631000  | -3.96344500 |
| H | 2.16738000  | 7.49315900  | -1.12794300 |
| H | 1.41345100  | 7.14510800  | -3.47259600 |
| S | 5.00848100  | -2.53079700 | -2.29540300 |
| O | 4.47664100  | -3.08474700 | -0.98178100 |
| C | 6.36431300  | -1.36908100 | -1.88484900 |
| H | 7.17505400  | -1.96307800 | -1.45874600 |
| H | 6.70783300  | -0.87623100 | -2.79852700 |
| H | 6.01525800  | -0.63555000 | -1.15369500 |
| C | 3.81866200  | -1.27534300 | -2.89137800 |
| H | 4.19331900  | -0.84910000 | -3.82643900 |

|   |             |             |             |
|---|-------------|-------------|-------------|
| H | 2.87027400  | -1.79240800 | -3.05902400 |
| H | 3.69060400  | -0.49694900 | -2.13453600 |
| C | 5.08879300  | 2.48548800  | -0.51408100 |
| C | 3.71236300  | 2.29605900  | -0.36723900 |
| C | 3.19575600  | 1.64254300  | 0.76155600  |
| C | 4.09055700  | 1.16839000  | 1.73026000  |
| C | 5.46504200  | 1.34771700  | 1.57843600  |
| C | 5.97100600  | 2.01214600  | 0.45830300  |
| H | 5.46906000  | 3.00486400  | -1.38969500 |
| H | 3.03468200  | 2.65892100  | -1.13438700 |
| H | 3.70911900  | 0.64831800  | 2.60375400  |
| H | 6.13926400  | 0.96982600  | 2.34141300  |
| H | 7.04114000  | 2.16384900  | 0.34774300  |
| C | 1.71078500  | 1.38049000  | 0.92180800  |
| H | 1.46258100  | 1.26007100  | 1.98538800  |
| H | 1.51141100  | 0.40823500  | 0.45364700  |
| N | 0.92759100  | 2.46287200  | 0.30959300  |
| H | 1.44605900  | 3.33175100  | 0.33517800  |
| H | -1.81197000 | 4.35708200  | 0.55664600  |
| C | 3.06805900  | -1.37512200 | 4.68345000  |
| C | 2.18247200  | -1.74743900 | 3.66849900  |
| C | 2.64118900  | -2.42152900 | 2.52981000  |
| C | 4.01025700  | -2.70882000 | 2.42279400  |
| C | 4.89605700  | -2.33417000 | 3.43357600  |
| C | 4.42814800  | -1.66863200 | 4.56972200  |
| H | 2.69329000  | -0.85897500 | 5.56337600  |
| H | 1.12544300  | -1.51075600 | 3.75401900  |
| H | 4.38255100  | -3.21313900 | 1.53463000  |
| H | 5.95326500  | -2.56772200 | 3.33751600  |
| H | 5.11728400  | -1.38524100 | 5.36080600  |
| C | 1.68641800  | -2.83316300 | 1.42617200  |
| H | 0.65769100  | -2.73648900 | 1.78924300  |
| H | 1.85742600  | -3.90275600 | 1.20813800  |
| N | 1.84088800  | -1.98350600 | 0.22913800  |
| H | 2.80484300  | -2.08612100 | -0.09527500 |
| H | 1.28604600  | -2.37659300 | -0.53300500 |
| S | -0.11651200 | -3.86553700 | -3.23067900 |
| O | 0.79270000  | -2.79394000 | -2.63527400 |
| C | -1.76744100 | -3.64759500 | -2.47796300 |

|   |             |             |             |
|---|-------------|-------------|-------------|
| H | -2.12846800 | -2.65749900 | -2.76271400 |
| H | -2.43948600 | -4.42152200 | -2.85823900 |
| H | -1.68669800 | -3.70263700 | -1.38946800 |
| C | 0.30901200  | -5.43497500 | -2.39353600 |
| H | -0.38055100 | -6.21935500 | -2.71631600 |
| H | 1.32850700  | -5.68889000 | -2.68836200 |
| H | 0.26420900  | -5.29320500 | -1.31099200 |

**TS4aD**

|   |             |             |             |
|---|-------------|-------------|-------------|
| C | 6.94318200  | -2.47648800 | 0.97453200  |
| C | 5.85136100  | -1.96676200 | 0.27411400  |
| C | 4.95492000  | -2.82839700 | -0.37475200 |
| C | 5.17802400  | -4.20766000 | -0.30505100 |
| C | 6.27448600  | -4.72019900 | 0.39121600  |
| C | 7.15960900  | -3.85548100 | 1.03439500  |
| H | 7.62887100  | -1.79667900 | 1.47252100  |
| H | 5.68489800  | -0.89400600 | 0.22909400  |
| H | 4.48712100  | -4.88590700 | -0.79982400 |
| H | 6.43186100  | -5.79422300 | 0.43528000  |
| H | 8.01123000  | -4.25144000 | 1.58014400  |
| C | 3.78959400  | -2.27382800 | -1.16691700 |
| H | 3.14620100  | -3.09411100 | -1.51451900 |
| H | 4.13275800  | -1.74981300 | -2.06518300 |
| N | 3.01577700  | -1.32084200 | -0.38355300 |
| H | 2.89917300  | -1.47779500 | 0.62182200  |
| C | 2.38015000  | -0.24158200 | -0.87000200 |
| S | 2.37178300  | 0.13232500  | -2.52681300 |
| C | 1.60047100  | 0.59315700  | 0.10148700  |
| C | 1.64844000  | 0.29383600  | 1.54503400  |
| O | 2.00298200  | -0.81112500 | 2.00874900  |
| C | 1.05687700  | 1.30191200  | 2.52002700  |
| H | 1.48373600  | 2.29881000  | 2.39659700  |
| H | -0.02376500 | 1.38044200  | 2.35949000  |
| H | 1.23884000  | 0.94474400  | 3.53557800  |
| H | 0.35558600  | -0.04549300 | -0.03610600 |
| C | 1.59339200  | 2.07628700  | -0.23798600 |
| C | 2.94656400  | 2.72460100  | -0.27274700 |
| C | 3.89951500  | 2.50939700  | 0.73852500  |
| C | 3.32876600  | 3.52539100  | -1.36364900 |



|   |             |             |             |
|---|-------------|-------------|-------------|
| C | 5.16002900  | 3.10444100  | 0.68392200  |
| H | 3.66262700  | 1.86951300  | 1.58182500  |
| C | 4.58888100  | 4.11797800  | -1.42346400 |
| H | 2.63624400  | 3.64944200  | -2.18890000 |
| C | 5.51028600  | 3.91624400  | -0.39526400 |
| H | 5.87027600  | 2.92890400  | 1.48726700  |
| H | 4.85643400  | 4.72408700  | -2.28450300 |
| H | 6.49433800  | 4.37373400  | -0.44137700 |
| C | 0.46525500  | 2.79278300  | -0.45853500 |
| C | 0.41832400  | 4.31789600  | -0.56111000 |
| H | 0.29494900  | 4.62013900  | -1.60974200 |
| C | -0.71161100 | 4.94015000  | 0.24561700  |
| C | -0.72857900 | 4.84742500  | 1.64567400  |
| C | -1.75702200 | 5.62903600  | -0.38427200 |
| C | -1.75689600 | 5.42372400  | 2.39044400  |
| H | 0.07469400  | 4.32051100  | 2.15285700  |
| C | -2.78906800 | 6.20916100  | 0.35789700  |
| H | -1.75546100 | 5.72230500  | -1.46772800 |
| C | -2.79250200 | 6.10701700  | 1.74882600  |
| H | -1.74822900 | 5.34254800  | 3.47375100  |
| H | -3.58564600 | 6.74365800  | -0.15220000 |
| H | -3.59218600 | 6.55809800  | 2.32900000  |
| S | -5.00047000 | -2.75774600 | 1.53747100  |
| O | -3.72695800 | -3.58957000 | 1.67543000  |
| C | -5.92331200 | -3.43467300 | 0.10747900  |
| H | -6.22192500 | -4.45104300 | 0.36990900  |
| H | -6.80962100 | -2.82108700 | -0.07402400 |
| H | -5.27357900 | -3.44881900 | -0.77042900 |
| C | -4.54634300 | -1.15792300 | 0.78357800  |
| H | -5.44827600 | -0.55292800 | 0.65926500  |
| H | -3.85210800 | -0.68073700 | 1.47949700  |
| H | -4.06100200 | -1.32002100 | -0.18141100 |
| C | -4.95851400 | 1.73269900  | -2.09052400 |
| C | -3.66889600 | 2.22187300  | -1.88653400 |
| C | -2.54642500 | 1.48719600  | -2.30062100 |
| C | -2.75283800 | 0.25303100  | -2.93050500 |
| C | -4.04463900 | -0.23890700 | -3.14062400 |
| C | -5.15084500 | 0.49967700  | -2.72043000 |
| H | -5.81500700 | 2.31971900  | -1.77039700 |

|   |             |             |             |
|---|-------------|-------------|-------------|
| H | -3.53270500 | 3.19187200  | -1.41323400 |
| H | -1.89827100 | -0.32425500 | -3.27091900 |
| H | -4.17673300 | -1.19658700 | -3.63572200 |
| H | -6.15644900 | 0.12509900  | -2.89065000 |
| C | -1.14894000 | 2.03263200  | -2.09518700 |
| H | -1.08326500 | 3.01495900  | -2.59379200 |
| H | -0.40619700 | 1.38719800  | -2.57195000 |
| N | -0.79593500 | 2.12438600  | -0.65245600 |
| H | -1.52692000 | 2.65896500  | -0.18559800 |
| H | 1.37101900  | 4.73987100  | -0.23340300 |
| C | -0.77030200 | -3.21198100 | -3.76673800 |
| C | -0.34643700 | -2.64494000 | -2.56348000 |
| C | -1.03922800 | -2.91148200 | -1.37257300 |
| C | -2.14792900 | -3.76903100 | -1.40721600 |
| C | -2.56388700 | -4.34146600 | -2.61205200 |
| C | -1.88001400 | -4.06025600 | -3.79576400 |
| H | -0.22413600 | -2.99660700 | -4.68073600 |
| H | 0.52070800  | -1.98819000 | -2.55797900 |
| H | -2.67505800 | -3.98874700 | -0.48137200 |
| H | -3.41682500 | -5.01526100 | -2.62360600 |
| H | -2.20084000 | -4.50732300 | -4.73257400 |
| C | -0.60471200 | -2.30700200 | -0.05502500 |
| H | 0.44896100  | -2.52507600 | 0.14029600  |
| H | -1.19762000 | -2.75077700 | 0.74903500  |
| N | -0.76766700 | -0.81873300 | 0.01036600  |
| H | -1.40078000 | -0.47300800 | -0.70736000 |
| H | -1.18016100 | -0.57454800 | 0.92005200  |
| S | -1.49118900 | -1.08703300 | 4.09079400  |
| O | -1.90897400 | -0.52614300 | 2.72570300  |
| C | -0.27822000 | -2.41857400 | 3.80219200  |
| H | 0.59746100  | -1.96060800 | 3.33333000  |
| H | -0.00645200 | -2.85069100 | 4.76940400  |
| H | -0.71722700 | -3.17687600 | 3.14975200  |
| C | -2.86391300 | -2.15328900 | 4.65458600  |
| H | -2.56068700 | -2.66537900 | 5.57169000  |
| H | -3.71307700 | -1.49978100 | 4.86459800  |
| H | -3.11370700 | -2.86225600 | 3.85929800  |

|   |             |             |             |
|---|-------------|-------------|-------------|
| C | -1.62006500 | 5.64563200  | -2.15933100 |
| C | -0.76975900 | 5.00297300  | -1.26132800 |
| C | -1.27530100 | 4.41068000  | -0.09403700 |
| C | -2.65196100 | 4.48080100  | 0.15069800  |
| C | -3.50666000 | 5.12682600  | -0.74636600 |
| C | -2.99264800 | 5.71015700  | -1.90391300 |
| H | -1.21188000 | 6.10256500  | -3.05653500 |
| H | 0.29777900  | 4.95818900  | -1.45990400 |
| H | -3.05530700 | 4.02980700  | 1.05394900  |
| H | -4.57197500 | 5.17342100  | -0.53849800 |
| H | -3.65449700 | 6.21504700  | -2.60184700 |
| C | -0.34523100 | 3.72483500  | 0.88422400  |
| H | -0.89610700 | 3.42038300  | 1.78226900  |
| H | 0.43451400  | 4.41299200  | 1.23440100  |
| N | 0.29996000  | 2.57742800  | 0.25937800  |
| H | -0.01647300 | 2.24664000  | -0.65297900 |
| C | 1.36880600  | 1.91858700  | 0.77071400  |
| S | 1.91138300  | 2.27307700  | 2.34520700  |
| C | 2.01271600  | 0.90654800  | -0.08394400 |
| C | 1.36471100  | 0.35988800  | -1.18921400 |
| O | 0.11669500  | 0.62651000  | -1.50962300 |
| C | 2.03810300  | -0.60328000 | -2.14390900 |
| H | 3.07505200  | -0.81608500 | -1.89468000 |
| H | 1.47604900  | -1.54382900 | -2.16394900 |
| H | 1.98248900  | -0.18216300 | -3.15511900 |
| H | -0.90260400 | -0.02211000 | -0.61291900 |
| C | 3.44727200  | 0.58126200  | 0.21827300  |
| C | 4.41220400  | 1.70047800  | -0.01595700 |
| C | 4.42197300  | 2.37346300  | -1.25037600 |
| C | 5.30560900  | 2.14200400  | 0.97521800  |
| C | 5.31325400  | 3.41632000  | -1.49875800 |
| H | 3.71925900  | 2.06997600  | -2.02091400 |
| C | 6.19951700  | 3.18420200  | 0.72913600  |
| H | 5.26940500  | 1.67732500  | 1.95486400  |
| C | 6.21156100  | 3.82455100  | -0.51080500 |
| H | 5.30670200  | 3.91131700  | -2.46656500 |
| H | 6.87563100  | 3.50847500  | 1.51580800  |
| H | 6.90359100  | 4.64020900  | -0.70106200 |
| C | 3.86646600  | -0.64274900 | 0.64013900  |

|   |             |             |             |
|---|-------------|-------------|-------------|
| C | 5.33443700  | -1.04674600 | 0.74467500  |
| H | 5.58338800  | -1.22002700 | 1.80057000  |
| C | 5.67820400  | -2.29927200 | -0.04689700 |
| C | 5.76486500  | -2.25117000 | -1.44686700 |
| C | 5.91743600  | -3.52293400 | 0.59116400  |
| C | 6.07575500  | -3.39209500 | -2.18367500 |
| H | 5.59375100  | -1.30576800 | -1.95494800 |
| C | 6.22616100  | -4.67080000 | -0.14442700 |
| H | 5.87679800  | -3.57437500 | 1.67711400  |
| C | 6.30524400  | -4.60861400 | -1.53458600 |
| H | 6.14334700  | -3.33294400 | -3.26646700 |
| H | 6.41063700  | -5.60900000 | 0.37155500  |
| H | 6.54908400  | -5.49748300 | -2.10924200 |
| S | -6.34573200 | -2.11188600 | -0.75995200 |
| O | -5.80852200 | -0.68385800 | -0.77945100 |
| C | -7.54338300 | -2.20524300 | 0.62186400  |
| H | -8.36959300 | -1.53666400 | 0.37432100  |
| H | -7.91033600 | -3.23053500 | 0.71726800  |
| H | -7.06273500 | -1.87652100 | 1.54623400  |
| C | -5.05816000 | -3.17832800 | -0.02378800 |
| H | -5.45377700 | -4.19152800 | 0.08931400  |
| H | -4.21800100 | -3.16698500 | -0.72169100 |
| H | -4.74917600 | -2.76895400 | 0.94129800  |
| C | -0.57088100 | -3.95703400 | 0.33615000  |
| C | 0.56116200  | -3.16029300 | 0.53150500  |
| C | 0.72436000  | -2.42297900 | 1.71086300  |
| C | -0.27825900 | -2.50117400 | 2.69155600  |
| C | -1.41031300 | -3.29413800 | 2.49877000  |
| C | -1.55868900 | -4.03017800 | 1.31917500  |
| H | -0.68141700 | -4.51594600 | -0.58841800 |
| H | 1.33358700  | -3.10031000 | -0.22754300 |
| H | -0.16886800 | -1.93481500 | 3.61305100  |
| H | -2.17241100 | -3.33877200 | 3.27180600  |
| H | -2.43278600 | -4.65792000 | 1.17149800  |
| C | 1.93476100  | -1.53628600 | 1.95245000  |
| H | 2.31104100  | -1.73628200 | 2.97040100  |
| H | 1.62882000  | -0.48762700 | 1.96103800  |
| N | 2.98159900  | -1.69941300 | 0.95251000  |
| H | 3.47286800  | -2.57860400 | 1.05945900  |

|   |             |             |             |
|---|-------------|-------------|-------------|
| H | 5.96218700  | -0.22473000 | 0.40019900  |
| C | -2.22710400 | 0.87707600  | 4.07031100  |
| C | -1.98477500 | 0.83676000  | 2.69695100  |
| C | -3.02310700 | 0.52643500  | 1.80539800  |
| C | -4.30513300 | 0.27262400  | 2.30947900  |
| C | -4.54525700 | 0.31973400  | 3.68452200  |
| C | -3.50619800 | 0.61645800  | 4.56744000  |
| H | -1.41458100 | 1.12697100  | 4.74581900  |
| H | -0.98552700 | 1.06196300  | 2.33124200  |
| H | -5.10861300 | 0.05453200  | 1.61055100  |
| H | -5.54471700 | 0.12857900  | 4.06587000  |
| H | -3.69302400 | 0.65423800  | 5.63678500  |
| C | -2.78847500 | 0.49177300  | 0.31239300  |
| H | -2.44442700 | 1.46625400  | -0.04544200 |
| H | -3.71375000 | 0.23396500  | -0.20697700 |
| N | -1.73863500 | -0.51213100 | -0.09891700 |
| H | -1.37854800 | -1.03742200 | 0.70137500  |
| H | -2.12914600 | -1.18876600 | -0.78797100 |
| S | -2.76534000 | -1.60052000 | -3.60889900 |
| O | -2.74637100 | -2.11643600 | -2.15879000 |
| C | -2.23571300 | 0.14420000  | -3.59144200 |
| H | -1.24727400 | 0.19873200  | -3.11858400 |
| H | -2.18341900 | 0.48844400  | -4.62805300 |
| H | -2.95254200 | 0.74695800  | -3.02778000 |
| C | -4.52269600 | -1.30512400 | -4.01043400 |
| H | -4.58865900 | -0.75473700 | -4.95246900 |
| H | -5.00128200 | -2.28018500 | -4.12022800 |
| H | -4.98122300 | -0.75250800 | -3.18492600 |

**TS4bD**

|   |             |            |             |
|---|-------------|------------|-------------|
| C | 0.79084100  | 6.19148800 | 2.16762900  |
| C | 0.18790200  | 5.36272100 | 1.22317100  |
| C | 0.94767400  | 4.76693400 | 0.20532100  |
| C | 2.32242200  | 5.02445400 | 0.15473100  |
| C | 2.92833300  | 5.85859100 | 1.09735800  |
| C | 2.16417700  | 6.44253700 | 2.10702300  |
| H | 0.18871000  | 6.64689300 | 2.94875800  |
| H | -0.88127500 | 5.17317000 | 1.26892400  |
| H | 2.92106400  | 4.57142300 | -0.63176000 |

|   |             |             |             |
|---|-------------|-------------|-------------|
| H | 3.99639000  | 6.04904500  | 1.04205200  |
| H | 2.63314300  | 7.09101400  | 2.84143600  |
| C | 0.28711200  | 3.87857000  | -0.82688500 |
| H | 1.02344800  | 3.54264800  | -1.56763700 |
| H | -0.47522400 | 4.42716600  | -1.39335200 |
| N | -0.36133300 | 2.73969300  | -0.18728900 |
| H | -0.11869600 | 2.51316900  | 0.77337300  |
| C | -1.25812200 | 1.92266600  | -0.78505500 |
| S | -1.61193200 | 2.09638300  | -2.43401100 |
| C | -1.92429000 | 0.91236800  | 0.07162300  |
| C | -1.35056800 | 0.44023700  | 1.23585500  |
| O | -0.10435300 | 0.74012500  | 1.61427300  |
| C | -2.05675900 | -0.46565100 | 2.21294000  |
| H | -3.12169700 | -0.56686000 | 2.01460400  |
| H | -1.60749400 | -1.46546000 | 2.18810400  |
| H | -1.90295200 | -0.06802600 | 3.22248300  |
| H | 0.76426400  | 0.32618500  | 0.83541900  |
| C | -3.31495300 | 0.51065800  | -0.31979900 |
| C | -4.33019600 | 1.60774000  | -0.27906700 |
| C | -4.46024700 | 2.40226800  | 0.87330600  |
| C | -5.15411300 | 1.90690400  | -1.37750600 |
| C | -5.40212200 | 3.42822100  | 0.94055100  |
| H | -3.81326900 | 2.20707900  | 1.72365300  |
| C | -6.09709800 | 2.93250200  | -1.31278700 |
| H | -5.02671600 | 1.34351500  | -2.29592500 |
| C | -6.22937300 | 3.69582700  | -0.15184200 |
| H | -5.49051100 | 4.01976000  | 1.84811200  |
| H | -6.71818600 | 3.14628700  | -2.17845900 |
| H | -6.96044700 | 4.49790600  | -0.10295900 |
| C | -3.64431200 | -0.76815300 | -0.64474900 |
| C | -5.07773500 | -1.25925700 | -0.82166700 |
| H | -5.21717800 | -1.58605200 | -1.86124800 |
| C | -5.43472100 | -2.41223600 | 0.10385200  |
| C | -5.69140600 | -2.17393300 | 1.46273800  |
| C | -5.51274400 | -3.72918200 | -0.36626800 |
| C | -6.01165500 | -3.22120900 | 2.32421400  |
| H | -5.64599100 | -1.15507900 | 1.83853700  |
| C | -5.82952500 | -4.78311200 | 0.49531800  |
| H | -5.33864600 | -3.93014300 | -1.42107300 |

|   |             |             |             |
|---|-------------|-------------|-------------|
| C | -6.07885100 | -4.53190400 | 1.84352600  |
| H | -6.21289000 | -3.01566000 | 3.37191600  |
| H | -5.88640700 | -5.79705200 | 0.10932500  |
| H | -6.32924200 | -5.34812700 | 2.51493400  |
| S | 6.09250600  | -2.18476800 | 0.80851700  |
| O | 5.64880500  | -0.78183100 | 1.21676500  |
| C | 7.40442300  | -1.98343700 | -0.45413500 |
| H | 8.23844100  | -1.47312800 | 0.03061700  |
| H | 7.72363000  | -2.96921000 | -0.80259400 |
| H | 7.02854000  | -1.38230500 | -1.28489100 |
| C | 4.81359400  | -2.87984300 | -0.29421600 |
| H | 5.15509300  | -3.84828500 | -0.66980800 |
| H | 3.91809300  | -2.99880400 | 0.31865700  |
| H | 4.61806400  | -2.18763000 | -1.11646500 |
| C | 0.99363000  | -4.01571800 | -0.59385000 |
| C | -0.02888300 | -3.06645800 | -0.64097000 |
| C | -0.64612700 | -2.73351800 | -1.85528500 |
| C | -0.21659200 | -3.38074900 | -3.02119300 |
| C | 0.80487000  | -4.33096500 | -2.97905600 |
| C | 1.41282400  | -4.65240000 | -1.76427800 |
| H | 1.45981700  | -4.24212500 | 0.36006700  |
| H | -0.36734800 | -2.58697800 | 0.27168600  |
| H | -0.69098900 | -3.13935400 | -3.96932900 |
| H | 1.11938700  | -4.82515100 | -3.89425200 |
| H | 2.20165100  | -5.39901900 | -1.72968800 |
| C | -1.72969900 | -1.67578000 | -1.91929200 |
| H | -2.24030600 | -1.74280900 | -2.89447400 |
| H | -1.28912400 | -0.67476600 | -1.89147200 |
| N | -2.66489100 | -1.78278100 | -0.79331100 |
| H | -3.08896000 | -2.70447900 | -0.77284000 |
| H | -5.77203000 | -0.43614800 | -0.64983400 |
| C | 2.96515200  | 1.07294900  | -3.93228200 |
| C | 2.44953900  | 1.05500800  | -2.63588400 |
| C | 3.30163900  | 0.86868900  | -1.53651600 |
| C | 4.67671300  | 0.71794100  | -1.75948700 |
| C | 5.19101500  | 0.74795200  | -3.05814000 |
| C | 4.33633000  | 0.92029000  | -4.14766100 |
| H | 2.29222700  | 1.21916000  | -4.77186400 |
| H | 1.38030000  | 1.20201700  | -2.49272300 |

|   |            |             |             |
|---|------------|-------------|-------------|
| H | 5.33334100 | 0.57407400  | -0.90540200 |
| H | 6.26080800 | 0.64107000  | -3.21849100 |
| H | 4.73549900 | 0.94269200  | -5.15755000 |
| C | 2.76233400 | 0.87534300  | -0.12143300 |
| H | 2.33163500 | 1.85596300  | 0.10699800  |
| H | 3.57543100 | 0.68933900  | 0.58338700  |
| N | 1.69728200 | -0.14353500 | 0.13556000  |
| H | 1.30341400 | -0.49810200 | -0.73555900 |
| H | 2.06979300 | -0.95305700 | 0.65693100  |
| S | 2.40273500 | -2.01461100 | 3.46766700  |
| O | 2.42118300 | -2.27811400 | 1.95420500  |
| C | 2.19165400 | -0.21953600 | 3.71584600  |
| H | 1.24638700 | 0.07188300  | 3.24653400  |
| H | 2.16097900 | -0.02501700 | 4.79148300  |
| H | 3.02597700 | 0.31454700  | 3.25387900  |
| C | 4.13824400 | -2.11112600 | 4.03082300  |
| H | 4.19106000 | -1.79263000 | 5.07527100  |
| H | 4.44856700 | -3.15460600 | 3.94914200  |
| H | 4.75300800 | -1.47922800 | 3.38280900  |

**Int6D**

|   |             |            |             |
|---|-------------|------------|-------------|
| C | -3.49433400 | 6.35554100 | 1.14313700  |
| C | -2.93133000 | 5.29978500 | 0.42795100  |
| C | -1.54404900 | 5.23687700 | 0.22774600  |
| C | -0.73809600 | 6.25069700 | 0.75638000  |
| C | -1.30186700 | 7.31159400 | 1.46798100  |
| C | -2.68153000 | 7.36544100 | 1.66419800  |
| H | -4.56997400 | 6.39337500 | 1.28996900  |
| H | -3.56710000 | 4.51674600 | 0.02293700  |
| H | 0.33831800  | 6.21006800 | 0.60936500  |
| H | -0.66233000 | 8.09129900 | 1.87153900  |
| H | -3.12209200 | 8.18845600 | 2.21936500  |
| C | -0.93666500 | 4.10000400 | -0.56475400 |
| H | 0.15386100  | 4.21541500 | -0.62300700 |
| H | -1.29935200 | 4.08934900 | -1.59835600 |
| N | -1.28621500 | 2.80953400 | 0.01901800  |
| H | -1.48390200 | 2.79230800 | 1.01155000  |
| C | -1.33754000 | 1.63206900 | -0.63097700 |
| S | -0.95323600 | 1.49451400 | -2.26978000 |



|   |             |             |             |
|---|-------------|-------------|-------------|
| C | -1.80728000 | 0.47827900  | 0.19942700  |
| C | -1.21653500 | 0.19763700  | 1.40008800  |
| O | -0.08795700 | 0.80788700  | 1.84752200  |
| C | -1.71538000 | -0.82865600 | 2.37496800  |
| H | -2.76168900 | -1.08038800 | 2.20629300  |
| H | -1.12630800 | -1.75092700 | 2.29807300  |
| H | -1.58170400 | -0.44183800 | 3.39055300  |
| H | 0.58383300  | 0.98977100  | 1.09516300  |
| C | -2.98449900 | -0.27328400 | -0.32013600 |
| C | -4.18249400 | 0.56825300  | -0.61076200 |
| C | -4.66230400 | 1.47890700  | 0.34954200  |
| C | -4.84329500 | 0.52630100  | -1.85189300 |
| C | -5.76903500 | 2.28767100  | 0.09335200  |
| H | -4.16188000 | 1.53794200  | 1.31220900  |
| C | -5.95381900 | 1.33007900  | -2.10972600 |
| H | -4.45986600 | -0.13070900 | -2.62631200 |
| C | -6.42418700 | 2.21500600  | -1.13859200 |
| H | -6.12763300 | 2.96853000  | 0.86123000  |
| H | -6.44180400 | 1.27675600  | -3.07919400 |
| H | -7.28542400 | 2.84536800  | -1.34045100 |
| C | -2.99381800 | -1.63128200 | -0.52166000 |
| C | -4.28606100 | -2.41994200 | -0.74603800 |
| H | -4.28818500 | -2.81773500 | -1.76881900 |
| C | -4.46259500 | -3.57431200 | 0.22717200  |
| C | -4.87978600 | -3.33425700 | 1.54514300  |
| C | -4.21342800 | -4.89712700 | -0.16102200 |
| C | -5.03576500 | -4.38407000 | 2.44804400  |
| H | -5.09017900 | -2.31453800 | 1.85734500  |
| C | -4.36532700 | -5.95228100 | 0.74273300  |
| H | -3.90745600 | -5.10403700 | -1.18403100 |
| C | -4.77609800 | -5.69844600 | 2.05039900  |
| H | -5.36477300 | -4.17827100 | 3.46282500  |
| H | -4.16790200 | -6.97070600 | 0.42029700  |
| H | -4.89954600 | -6.51672900 | 2.75378600  |
| S | 6.49505600  | -1.43289700 | 0.95329000  |
| O | 5.96711300  | -0.32108300 | 1.85603300  |
| C | 7.97369500  | -0.76802100 | 0.10126500  |
| H | 8.72337000  | -0.56731300 | 0.86858200  |
| H | 8.35134200  | -1.51429700 | -0.60271500 |

|   |             |             |             |
|---|-------------|-------------|-------------|
| H | 7.70953300  | 0.15544600  | -0.41795200 |
| C | 5.40830500  | -1.53773500 | -0.51041600 |
| H | 5.79253900  | -2.31028200 | -1.18219900 |
| H | 4.42162900  | -1.80973900 | -0.12817200 |
| H | 5.36211500  | -0.56818200 | -1.01095700 |
| C | 1.99385700  | -4.78851600 | -1.87871500 |
| C | 1.37005000  | -3.75366000 | -1.17668000 |
| C | 0.15925100  | -3.21733300 | -1.63093700 |
| C | -0.41430400 | -3.73830500 | -2.80030800 |
| C | 0.20721000  | -4.77126500 | -3.49994300 |
| C | 1.41531800  | -5.30158100 | -3.03935600 |
| H | 2.93195100  | -5.19824800 | -1.51320700 |
| H | 1.82296400  | -3.34937600 | -0.27464400 |
| H | -1.35242600 | -3.32462600 | -3.16074300 |
| H | -0.24769000 | -5.16084200 | -4.40663100 |
| H | 1.89967200  | -6.10799700 | -3.58301700 |
| C | -0.51418600 | -2.08447300 | -0.87743500 |
| H | -0.55907100 | -1.18715900 | -1.50660200 |
| H | 0.09076800  | -1.83107700 | 0.00274300  |
| N | -1.88237200 | -2.44494700 | -0.52394500 |
| H | -2.05264200 | -3.43089000 | -0.39159500 |
| H | -5.13797200 | -1.74549900 | -0.66025200 |
| C | 4.36445600  | 2.91050600  | -3.21536000 |
| C | 3.39999200  | 2.72420100  | -2.22586500 |
| C | 3.77295000  | 2.39079800  | -0.91541000 |
| C | 5.13376200  | 2.24611400  | -0.61639200 |
| C | 6.10122400  | 2.44648100  | -1.60566400 |
| C | 5.72030400  | 2.77847000  | -2.90623300 |
| H | 4.05858700  | 3.16839700  | -4.22518600 |
| H | 2.34618400  | 2.83740800  | -2.47269300 |
| H | 5.43571900  | 1.95644400  | 0.38746300  |
| H | 7.15547500  | 2.35624800  | -1.35602100 |
| H | 6.47302200  | 2.93716800  | -3.67312400 |
| C | 2.71477000  | 2.22021200  | 0.15960500  |
| H | 2.06784900  | 3.10528800  | 0.16735600  |
| H | 3.19397600  | 2.17316400  | 1.14187700  |
| N | 1.83799200  | 1.04033700  | 0.03141700  |
| H | 1.42835100  | 0.99488800  | -0.90219400 |
| H | 2.34963900  | 0.17098500  | 0.20034900  |

|   |            |             |            |
|---|------------|-------------|------------|
| S | 2.42194500 | -1.71330000 | 2.79682100 |
| O | 2.62742500 | -1.69781000 | 1.27656800 |
| C | 2.80311600 | -0.03592500 | 3.40828900 |
| H | 1.97503800 | 0.60096700  | 3.09580600 |
| H | 2.86047400 | -0.06391500 | 4.49987700 |
| H | 3.75636500 | 0.27349600  | 2.97140200 |
| C | 3.89263100 | -2.52917000 | 3.51753000 |
| H | 3.77270900 | -2.57426900 | 4.60348000 |
| H | 3.92881900 | -3.54112900 | 3.10990000 |
| H | 4.78437500 | -1.96174300 | 3.24097600 |

**TS5'D**

|   |             |             |             |
|---|-------------|-------------|-------------|
| C | -6.37417000 | 0.05610500  | 2.33128700  |
| C | -5.38749100 | -0.34319500 | 1.43141400  |
| C | -5.27884600 | 0.26311600  | 0.17067800  |
| C | -6.18197700 | 1.27930100  | -0.16150600 |
| C | -7.17481500 | 1.67858600  | 0.73598400  |
| C | -7.27303400 | 1.06909400  | 1.98651100  |
| H | -6.44633000 | -0.42668600 | 3.30214900  |
| H | -4.68882800 | -1.13111500 | 1.69794600  |
| H | -6.10678900 | 1.76082500  | -1.13347800 |
| H | -7.86722800 | 2.46863500  | 0.45860200  |
| H | -8.04274100 | 1.37903900  | 2.68758000  |
| C | -4.22846100 | -0.19408200 | -0.81937600 |
| H | -4.24018300 | 0.45723600  | -1.70714300 |
| H | -4.44218400 | -1.20359200 | -1.18378400 |
| N | -2.91158100 | -0.23098500 | -0.20218000 |
| H | -2.70114100 | 0.56293100  | 0.38487900  |
| C | -1.83397100 | -0.91744500 | -0.71428100 |
| S | -2.07201200 | -2.04851400 | -1.96508000 |
| C | -0.55154200 | -0.66721200 | -0.11302500 |
| C | -0.16281100 | 0.55646500  | 0.56617200  |
| O | -0.93724900 | 1.66106600  | 0.32379600  |
| C | 0.35710500  | 0.51395400  | 1.99521100  |
| H | 1.05753100  | -0.30884000 | 2.13567400  |
| H | 0.85356600  | 1.45159800  | 2.28309500  |
| H | -0.49747800 | 0.35460800  | 2.66094400  |
| C | 0.65979200  | -1.41746100 | -0.43699300 |
| C | 0.71209600  | -2.89757700 | -0.56065300 |

|   |             |             |             |
|---|-------------|-------------|-------------|
| C | 0.18670400  | -3.68798000 | 0.47296100  |
| C | 1.33319200  | -3.53620000 | -1.64429500 |
| C | 0.29403500  | -5.07626300 | 0.43195400  |
| H | -0.31757800 | -3.20065600 | 1.30179100  |
| C | 1.43460200  | -4.92554300 | -1.68836400 |
| H | 1.69455000  | -2.93917600 | -2.47562100 |
| C | 0.92065200  | -5.70118900 | -0.64787700 |
| H | -0.11913100 | -5.67232300 | 1.24085000  |
| H | 1.90444400  | -5.40362200 | -2.54325700 |
| H | 0.99731300  | -6.78404300 | -0.68394200 |
| C | 1.78288300  | -0.64529500 | -0.52961900 |
| C | 3.22922300  | -1.02303000 | -0.70652300 |
| H | 3.64547500  | -0.56658000 | -1.61627600 |
| C | 4.10384800  | -0.62910700 | 0.47888600  |
| C | 3.91149000  | -1.23579800 | 1.73002000  |
| C | 5.10395600  | 0.34337800  | 0.35689700  |
| C | 4.69633500  | -0.87802500 | 2.82506900  |
| H | 3.14694300  | -2.00185100 | 1.83415500  |
| C | 5.89076700  | 0.70719800  | 1.45376500  |
| H | 5.28267300  | 0.80626600  | -0.61146800 |
| C | 5.68769200  | 0.09839100  | 2.69139900  |
| H | 4.53959900  | -1.36544200 | 3.78319400  |
| H | 6.66478900  | 1.46050100  | 1.33698700  |
| H | 6.29923100  | 0.37640900  | 3.54461200  |
| C | 0.57492500  | 5.30166000  | -1.16645900 |
| C | 0.45206600  | 3.93678800  | -1.43309800 |
| C | 1.54901300  | 3.07920500  | -1.27975800 |
| C | 2.77158200  | 3.61757000  | -0.85144100 |
| C | 2.89350800  | 4.97939700  | -0.57574900 |
| C | 1.79424900  | 5.82551600  | -0.73455600 |
| H | -0.28268600 | 5.95510300  | -1.29708200 |
| H | -0.49930100 | 3.52957500  | -1.76131400 |
| H | 3.63671500  | 2.96780700  | -0.73724400 |
| H | 3.84732700  | 5.38075000  | -0.24630600 |
| H | 1.88907300  | 6.88705000  | -0.52642500 |
| C | 1.42872100  | 1.59894600  | -1.56304900 |
| H | 2.22336100  | 1.26511900  | -2.24014700 |
| H | 0.47087800  | 1.35332100  | -2.03104400 |
| N | 1.49712600  | 0.77984100  | -0.31746900 |

|   |             |             |             |
|---|-------------|-------------|-------------|
| H | 2.15027000  | 1.19720600  | 0.34643900  |
| H | 3.28242800  | -2.10443200 | -0.85488800 |
| H | -0.71109100 | 2.36448900  | 0.94943600  |

**TS5D**

|   |             |             |             |
|---|-------------|-------------|-------------|
| C | -6.22524400 | -3.56409600 | -0.43566800 |
| C | -4.85145500 | -3.35367700 | -0.33390300 |
| C | -3.99792300 | -3.71520200 | -1.38805400 |
| C | -4.55158800 | -4.28888300 | -2.53744500 |
| C | -5.92875900 | -4.50120000 | -2.64020500 |
| C | -6.76917800 | -4.13774100 | -1.58889500 |
| H | -6.87511100 | -3.28561800 | 0.38949900  |
| H | -4.42410300 | -2.91551200 | 0.56397100  |
| H | -3.89877000 | -4.57535200 | -3.35929900 |
| H | -6.34173900 | -4.94867700 | -3.54009100 |
| H | -7.84051300 | -4.30136900 | -1.66439400 |
| C | -2.50094400 | -3.48323500 | -1.27874400 |
| H | -1.99985500 | -3.95677600 | -2.13341500 |
| H | -2.11227500 | -3.92964600 | -0.35970400 |
| N | -2.13849300 | -2.07280700 | -1.23808900 |
| H | -2.42484200 | -1.54227300 | -2.04831600 |
| C | -1.79473200 | -1.34124900 | -0.11702100 |
| S | -1.55540900 | -2.16269600 | 1.37924000  |
| C | -1.62160900 | 0.05772900  | -0.29918900 |
| C | -1.24481400 | 0.63624400  | -1.60712000 |
| O | -0.44516200 | -0.02489500 | -2.42305600 |
| C | -2.22191700 | 1.51414600  | -2.36543600 |
| H | -2.74910600 | 2.19538000  | -1.69610200 |
| H | -1.71717200 | 2.07728200  | -3.15650300 |
| H | -2.96571200 | 0.86278800  | -2.83933700 |
| H | 0.17580900  | -0.73117600 | -1.92710100 |
| C | -1.64443900 | 1.06314600  | 0.75078600  |
| C | -2.46015600 | 0.92962000  | 1.98919300  |
| C | -3.82729300 | 0.62655200  | 1.89836200  |
| C | -1.91106500 | 1.15776800  | 3.25955400  |
| C | -4.62121000 | 0.56304400  | 3.04167000  |
| H | -4.25880100 | 0.43256300  | 0.92124300  |
| C | -2.70322500 | 1.08941300  | 4.40529300  |
| H | -0.84933700 | 1.37117300  | 3.34258000  |

|   |             |             |             |
|---|-------------|-------------|-------------|
| C | -4.06307700 | 0.79374100  | 4.30064800  |
| H | -5.67822700 | 0.32907400  | 2.95036900  |
| H | -2.25772200 | 1.26292700  | 5.38119700  |
| H | -4.68126200 | 0.73866500  | 5.19202100  |
| C | -0.94916300 | 2.20832100  | 0.48212700  |
| C | -0.94750600 | 3.53167700  | 1.20735200  |
| H | 0.08172300  | 3.84223200  | 1.43665700  |
| C | -1.62146600 | 4.63567800  | 0.39947300  |
| C | -3.02033500 | 4.67656200  | 0.29157700  |
| C | -0.87158400 | 5.60610400  | -0.27624500 |
| C | -3.64877700 | 5.66512000  | -0.46392400 |
| H | -3.61402500 | 3.92717700  | 0.80907100  |
| C | -1.49872200 | 6.59563200  | -1.03890600 |
| H | 0.21345300  | 5.59165300  | -0.20240100 |
| C | -2.88910700 | 6.62868400  | -1.13353200 |
| H | -4.73306400 | 5.68667200  | -0.52865000 |
| H | -0.89865000 | 7.34000600  | -1.55467500 |
| H | -3.37925600 | 7.39846800  | -1.72235800 |
| S | 2.51064200  | 0.20117000  | 3.19522400  |
| O | 4.03371400  | 0.22210100  | 3.34329300  |
| C | 1.83215800  | 0.08544700  | 4.89168800  |
| H | 2.05508500  | 1.02522600  | 5.40015800  |
| H | 0.75137000  | -0.06831300 | 4.83618800  |
| H | 2.31682200  | -0.74245200 | 5.41492500  |
| C | 2.02533400  | -1.46837500 | 2.65480800  |
| H | 0.93439000  | -1.52238300 | 2.56507900  |
| H | 2.48225800  | -1.59946900 | 1.67332900  |
| H | 2.41012500  | -2.20907500 | 3.36095300  |
| C | 2.56397500  | 3.03366300  | -4.08699500 |
| C | 1.87629400  | 2.34540400  | -3.08722100 |
| C | 2.00662600  | 2.72742400  | -1.74310600 |
| C | 2.84145100  | 3.80794200  | -1.42738400 |
| C | 3.53698200  | 4.49098700  | -2.42732400 |
| C | 3.39721800  | 4.10601800  | -3.76098000 |
| H | 2.45413900  | 2.72745400  | -5.12348500 |
| H | 1.23665700  | 1.50441700  | -3.33989700 |
| H | 2.94893000  | 4.11464700  | -0.38949400 |
| H | 4.18252500  | 5.32409900  | -2.16420400 |
| H | 3.93427100  | 4.63717200  | -4.54142000 |

|   |             |             |             |
|---|-------------|-------------|-------------|
| C | 1.25204200  | 1.99950100  | -0.65593700 |
| H | 1.56904800  | 2.35072200  | 0.33137900  |
| H | 1.46811700  | 0.92898000  | -0.68426800 |
| N | -0.22615700 | 2.16416200  | -0.77900600 |
| H | -0.43457000 | 2.97815400  | -1.35716000 |
| H | -1.46052700 | 3.41620500  | 2.16422400  |
| C | 2.68954500  | -5.47392000 | 0.60595000  |
| C | 1.84919600  | -4.60410900 | -0.08747600 |
| C | 2.28599400  | -3.97484700 | -1.26315300 |
| C | 3.57902000  | -4.24105600 | -1.72785200 |
| C | 4.42291000  | -5.11379400 | -1.03579800 |
| C | 3.97966400  | -5.73150800 | 0.13424000  |
| H | 2.33618400  | -5.95494100 | 1.51351400  |
| H | 0.84929100  | -4.40201500 | 0.29117900  |
| H | 3.92748300  | -3.76331500 | -2.64058400 |
| H | 5.42138700  | -5.31458600 | -1.41437500 |
| H | 4.63169600  | -6.41326900 | 0.67270200  |
| C | 1.38127300  | -2.99654400 | -1.98921600 |
| H | 0.40568100  | -3.45301800 | -2.18459500 |
| H | 1.81688800  | -2.73841900 | -2.95999500 |
| N | 1.14138200  | -1.73962500 | -1.24653800 |
| H | 0.67802100  | -1.95762000 | -0.36067700 |
| H | 2.04293800  | -1.31314300 | -1.00084900 |
| S | 5.03174400  | -0.33442100 | -0.23235800 |
| O | 3.50317800  | -0.41723700 | -0.13041300 |
| C | 5.70695700  | -1.46625400 | 1.03276100  |
| H | 5.41354500  | -2.47684000 | 0.74085500  |
| H | 6.79739900  | -1.38190600 | 1.03078300  |
| H | 5.28567800  | -1.19522300 | 2.00509600  |
| C | 5.50159300  | 1.22898700  | 0.58287600  |
| H | 6.59217100  | 1.30885600  | 0.59732500  |
| H | 5.07887600  | 2.03379800  | -0.02189200 |
| H | 5.08242900  | 1.22670200  | 1.59429700  |

**Int7'D**

|   |             |             |             |
|---|-------------|-------------|-------------|
| C | -5.94825800 | 0.79951500  | 2.43356500  |
| C | -5.06833300 | -0.06753900 | 1.78867200  |
| C | -5.15273100 | -0.27919900 | 0.40382200  |
| C | -6.14060000 | 0.40270000  | -0.31528600 |

|   |             |             |             |
|---|-------------|-------------|-------------|
| C | -7.02674600 | 1.27083300  | 0.32756900  |
| C | -6.93226100 | 1.47300700  | 1.70393800  |
| H | -5.87249000 | 0.94679400  | 3.50761900  |
| H | -4.30587900 | -0.59431300 | 2.35612400  |
| H | -6.21698100 | 0.24909600  | -1.38886700 |
| H | -7.78841800 | 1.78898600  | -0.24857900 |
| H | -7.62009200 | 2.14700900  | 2.20664900  |
| C | -4.20414200 | -1.23493800 | -0.28860400 |
| H | -4.45774800 | -1.31652700 | -1.35584600 |
| H | -4.29662500 | -2.24677300 | 0.11661700  |
| N | -2.82444900 | -0.80517200 | -0.09712100 |
| H | -2.68886000 | 0.19101200  | -0.20912600 |
| C | -1.73443200 | -1.58952500 | -0.45129200 |
| S | -1.99269100 | -3.20556500 | -0.92416700 |
| C | -0.45934600 | -0.95420200 | -0.37335400 |
| C | -0.26430400 | 0.47998000  | 0.07587600  |
| O | -1.14302500 | 1.38451900  | -0.54304100 |
| C | -0.25728000 | 0.66805800  | 1.59507500  |
| H | 0.51446800  | 0.04258500  | 2.04933200  |
| H | -0.07266100 | 1.71483400  | 1.88043300  |
| H | -1.23020200 | 0.35764900  | 1.98117500  |
| C | 0.84647200  | -1.50819800 | -0.53799400 |
| C | 1.22979000  | -2.94384700 | -0.63482900 |
| C | 1.05172000  | -3.79852100 | 0.46302100  |
| C | 1.87725400  | -3.43365000 | -1.77548100 |
| C | 1.50806400  | -5.11208800 | 0.41686000  |
| H | 0.53393300  | -3.42997700 | 1.34253600  |
| C | 2.31943300  | -4.75722500 | -1.82816100 |
| H | 2.01234200  | -2.77997100 | -2.63208600 |
| C | 2.13951900  | -5.59841500 | -0.73150800 |
| H | 1.35994300  | -5.76350200 | 1.27336100  |
| H | 2.80511600  | -5.12754500 | -2.72659100 |
| H | 2.48573400  | -6.62729400 | -0.76953600 |
| C | 1.84095800  | -0.55771900 | -0.51506100 |
| C | 3.33410000  | -0.62928100 | -0.49367000 |
| H | 3.79301600  | -0.17272900 | -1.38631300 |
| C | 3.96334700  | 0.01259400  | 0.74062500  |
| C | 3.65131500  | -0.46152700 | 2.02447500  |
| C | 4.85046400  | 1.09018100  | 0.62579800  |



|   |             |             |             |
|---|-------------|-------------|-------------|
| C | 4.21316600  | 0.12458200  | 3.15748200  |
| H | 2.97126200  | -1.30376900 | 2.12433400  |
| C | 5.41212000  | 1.68409700  | 1.76060300  |
| H | 5.11936300  | 1.45588200  | -0.36324800 |
| C | 5.09344500  | 1.20340400  | 3.02958500  |
| H | 3.96921300  | -0.26327100 | 4.14245000  |
| H | 6.10088700  | 2.51688900  | 1.64958100  |
| H | 5.52916100  | 1.66047700  | 3.91302200  |
| C | -0.01261800 | 5.15813200  | -1.87225500 |
| C | 0.07894200  | 3.77624800  | -2.04138800 |
| C | 1.17304500  | 3.06703200  | -1.52751600 |
| C | 2.17431700  | 3.77100200  | -0.84139900 |
| C | 2.07595800  | 5.15093800  | -0.66020300 |
| C | 0.98273400  | 5.84770600  | -1.17720400 |
| H | -0.86254600 | 5.69532100  | -2.28232600 |
| H | -0.70167900 | 3.23933500  | -2.57150700 |
| H | 3.04236700  | 3.24178100  | -0.45323500 |
| H | 2.85778100  | 5.68171100  | -0.12536600 |
| H | 0.90882600  | 6.92260200  | -1.04291500 |
| C | 1.29856000  | 1.57457100  | -1.72369300 |
| H | 2.27371300  | 1.32389800  | -2.14556400 |
| H | 0.52152100  | 1.16840900  | -2.36945200 |
| N | 1.21656200  | 0.78550800  | -0.42008600 |
| H | 1.68637400  | 1.34097700  | 0.30246300  |
| H | 3.59903100  | -1.69036500 | -0.53731500 |
| H | -1.16941500 | 2.20907700  | -0.03478100 |

**Int7D**

|   |             |            |             |
|---|-------------|------------|-------------|
| C | -1.06286800 | 7.15611700 | -0.21107200 |
| C | -0.63431200 | 5.90506800 | -0.65027100 |
| C | 0.63009300  | 5.41406900 | -0.29184400 |
| C | 1.45008900  | 6.20721600 | 0.51791600  |
| C | 1.02511100  | 7.46322200 | 0.95741100  |
| C | -0.23357200 | 7.94102500 | 0.59501100  |
| H | -2.04406500 | 7.52280300 | -0.50008800 |
| H | -1.27823200 | 5.29519400 | -1.27761500 |
| H | 2.43122500  | 5.83752200 | 0.80650600  |
| H | 1.67622000  | 8.06378800 | 1.58652800  |
| H | -0.56827700 | 8.91596400 | 0.93763500  |

|   |             |             |             |
|---|-------------|-------------|-------------|
| C | 1.10709200  | 4.06788200  | -0.79871300 |
| H | 2.09903400  | 3.84709300  | -0.37318900 |
| H | 1.24357000  | 4.08081200  | -1.88406100 |
| N | 0.13997200  | 3.02371600  | -0.50470800 |
| H | -0.22047800 | 3.02434100  | 0.44067600  |
| C | -0.03679900 | 1.86262700  | -1.23856500 |
| S | 0.93822200  | 1.62023100  | -2.64340800 |
| C | -0.98607100 | 0.93871400  | -0.74255800 |
| C | -1.56672000 | 1.04552200  | 0.66198600  |
| O | -0.69536300 | 1.33789000  | 1.67772600  |
| C | -2.79376800 | 1.95270300  | 0.79367500  |
| H | -3.58941100 | 1.63404800  | 0.11527100  |
| H | -3.16176100 | 1.95006100  | 1.82603400  |
| H | -2.50994200 | 2.97365600  | 0.53041300  |
| H | 0.24701600  | 1.01346100  | 1.46446300  |
| C | -1.61731000 | -0.16886900 | -1.39833800 |
| C | -1.65126600 | -0.43823200 | -2.86065100 |
| C | -2.09227700 | 0.55087900  | -3.75298400 |
| C | -1.32945900 | -1.70529100 | -3.36781000 |
| C | -2.21253300 | 0.27740300  | -5.11239700 |
| H | -2.32829500 | 1.53818700  | -3.37078600 |
| C | -1.43750700 | -1.97550400 | -4.73414500 |
| H | -0.97491200 | -2.47648600 | -2.69051500 |
| C | -1.88234500 | -0.98611300 | -5.61017700 |
| H | -2.55578100 | 1.05514500  | -5.78847700 |
| H | -1.18086400 | -2.96246700 | -5.10975900 |
| H | -1.97117300 | -1.19517800 | -6.67243000 |
| C | -2.35237400 | -0.94761000 | -0.53926100 |
| C | -3.36506900 | -2.03028800 | -0.76167100 |
| H | -3.07380000 | -2.97470100 | -0.27638100 |
| C | -4.76748000 | -1.66246900 | -0.28328500 |
| C | -5.46032000 | -0.59523700 | -0.87559500 |
| C | -5.38888900 | -2.36635400 | 0.75552900  |
| C | -6.73836000 | -0.24662700 | -0.44238400 |
| H | -4.99011300 | -0.04502600 | -1.68667500 |
| C | -6.66893500 | -2.01571700 | 1.19652900  |
| H | -4.87309400 | -3.20805800 | 1.21308700  |
| C | -7.34660700 | -0.95445700 | 0.59857400  |
| H | -7.26345700 | 0.57621000  | -0.91911500 |

|   |             |             |             |
|---|-------------|-------------|-------------|
| H | -7.13447600 | -2.57595600 | 2.00250500  |
| H | -8.34148600 | -0.68070300 | 0.93697600  |
| S | 1.90856300  | -3.50388400 | -2.40899600 |
| O | 2.80362400  | -4.47235200 | -1.63006500 |
| C | 2.61435100  | -3.35891400 | -4.09021800 |
| H | 2.05981500  | -2.59390400 | -4.63958300 |
| H | 3.67240600  | -3.09675900 | -4.01477500 |
| H | 2.50397200  | -4.32927200 | -4.57751100 |
| C | 2.31284600  | -1.82427900 | -1.84220100 |
| H | 1.71315200  | -1.07641700 | -2.37303700 |
| H | 2.07542900  | -1.81522300 | -0.77619200 |
| H | 3.38105200  | -1.63860100 | -1.98339000 |
| C | -0.63761100 | -0.80724700 | 5.39678700  |
| C | -0.46042400 | -0.94184300 | 4.02027400  |
| C | -1.55136900 | -1.21546500 | 3.18778000  |
| C | -2.82216200 | -1.36124600 | 3.76166900  |
| C | -3.00267900 | -1.21142600 | 5.13709300  |
| C | -1.90920800 | -0.93422200 | 5.95845000  |
| H | 0.21832900  | -0.59678500 | 6.03142700  |
| H | 0.52697700  | -0.84574900 | 3.58112200  |
| H | -3.68084800 | -1.60460900 | 3.13805300  |
| H | -3.99421500 | -1.32147500 | 5.56641900  |
| H | -2.04688200 | -0.82215900 | 7.02987000  |
| C | -1.34992500 | -1.40705800 | 1.70305400  |
| H | -1.66700900 | -2.41047300 | 1.40597300  |
| H | -0.30746600 | -1.29880300 | 1.40936100  |
| N | -2.17200900 | -0.46204700 | 0.84662900  |
| H | -3.08247900 | -0.35502800 | 1.30286900  |
| H | -3.38762000 | -2.24078000 | -1.83462000 |
| C | 5.85789400  | 0.87377300  | -0.79721200 |
| C | 4.60345200  | 1.21672000  | -0.29403300 |
| C | 4.31115400  | 1.04872200  | 1.06868200  |
| C | 5.30461700  | 0.53387500  | 1.90992300  |
| C | 6.56314100  | 0.19052900  | 1.40770800  |
| C | 6.84196100  | 0.35911200  | 0.05134700  |
| H | 6.06953500  | 1.01389100  | -1.85347700 |
| H | 3.84274100  | 1.60914900  | -0.96668900 |
| H | 5.09379200  | 0.40663500  | 2.96951000  |
| H | 7.32403500  | -0.20195300 | 2.07679900  |

|   |            |             |             |
|---|------------|-------------|-------------|
| H | 7.81957400 | 0.09606100  | -0.34224300 |
| C | 2.93474200 | 1.39845300  | 1.60710500  |
| H | 2.69611000 | 2.44236000  | 1.37577400  |
| H | 2.93198900 | 1.30996600  | 2.69862900  |
| N | 1.83915000 | 0.56248700  | 1.07730200  |
| H | 1.81556900 | 0.64117200  | 0.05893400  |
| H | 2.02327300 | -0.42296100 | 1.28937000  |
| S | 2.79640600 | -3.46338000 | 2.11263900  |
| O | 1.89595800 | -2.36627900 | 1.52408800  |
| C | 4.33707400 | -3.49783100 | 1.13074000  |
| H | 4.81396600 | -2.52267400 | 1.24966200  |
| H | 4.98388700 | -4.27747800 | 1.54363400  |
| H | 4.09742000 | -3.70119200 | 0.08270200  |
| C | 2.11909400 | -5.05342300 | 1.52561700  |
| H | 2.74909800 | -5.86167500 | 1.90752300  |
| H | 1.11495700 | -5.14195000 | 1.94462300  |
| H | 2.10045900 | -5.05112200 | 0.43109800  |

**Int8'D**

|   |             |             |             |
|---|-------------|-------------|-------------|
| C | -5.11829700 | 4.09662800  | 1.86891800  |
| C | -4.82546100 | 2.77189200  | 1.55115400  |
| C | -5.47016600 | 2.12858800  | 0.48351800  |
| C | -6.41532100 | 2.84905200  | -0.25474000 |
| C | -6.71435800 | 4.17666500  | 0.06179800  |
| C | -6.06535000 | 4.80517400  | 1.12372700  |
| H | -4.61245500 | 4.57730000  | 2.70201100  |
| H | -4.09460200 | 2.21986200  | 2.13619000  |
| H | -6.92247400 | 2.36386600  | -1.08512300 |
| H | -7.45197200 | 4.71838200  | -0.52389500 |
| H | -6.29506000 | 5.83751800  | 1.37187800  |
| C | -5.15897300 | 0.68399200  | 0.15153200  |
| H | -5.81902400 | 0.33620000  | -0.65726800 |
| H | -5.36010600 | 0.02702500  | 1.00326100  |
| N | -3.75637100 | 0.51923300  | -0.19758100 |
| H | -3.39509500 | 1.19446300  | -0.86021300 |
| C | -3.08989200 | -0.69560200 | -0.18525100 |
| S | -3.89564800 | -2.08726000 | 0.41255200  |
| C | -1.74722000 | -0.66327400 | -0.64592900 |
| C | -0.95566700 | 0.62204000  | -0.72320300 |

|   |             |             |             |
|---|-------------|-------------|-------------|
| O | -1.50031700 | 1.47668500  | -1.71329200 |
| C | -0.77178400 | 1.36269900  | 0.60273500  |
| H | -0.36111700 | 0.69417800  | 1.36188800  |
| H | -0.11235000 | 2.23178100  | 0.48993300  |
| H | -1.75271200 | 1.70000500  | 0.94148500  |
| C | -0.92596800 | -1.73268500 | -1.10229200 |
| C | -1.37086600 | -3.13499200 | -1.34913500 |
| C | -0.92776200 | -4.19887100 | -0.55320100 |
| C | -2.18217600 | -3.41485800 | -2.45766200 |
| C | -1.29708100 | -5.51108000 | -0.85013600 |
| H | -0.31979400 | -3.99127100 | 0.32221700  |
| C | -2.54822600 | -4.72534500 | -2.75638500 |
| H | -2.53431100 | -2.59431900 | -3.07497500 |
| C | -2.10777300 | -5.77921900 | -1.95320700 |
| H | -0.95347300 | -6.32410500 | -0.21629200 |
| H | -3.18178700 | -4.92426100 | -3.61620800 |
| H | -2.39601500 | -6.80063900 | -2.18478800 |
| C | 0.34493700  | -1.34554700 | -1.44756100 |
| C | 1.39288500  | -2.10775400 | -2.20373800 |
| H | 1.55165500  | -1.70281100 | -3.21539100 |
| C | 2.76091800  | -2.26601900 | -1.54550200 |
| C | 2.89264300  | -2.93533900 | -0.31930200 |
| C | 3.92065300  | -1.78731000 | -2.16602800 |
| C | 4.14496200  | -3.11859300 | 0.26619000  |
| H | 2.00126800  | -3.31577800 | 0.17085800  |
| C | 5.17801900  | -1.95951400 | -1.58022600 |
| H | 3.84258700  | -1.28536200 | -3.12802300 |
| C | 5.29499500  | -2.62676200 | -0.36091600 |
| H | 4.22719500  | -3.65101100 | 1.20983400  |
| H | 6.06359500  | -1.57847600 | -2.08092400 |
| H | 6.27089400  | -2.77302000 | 0.09295200  |
| C | 0.88306400  | 4.62144600  | -3.01006600 |
| C | 0.61291600  | 3.25464800  | -3.09113400 |
| C | 1.27517100  | 2.34147500  | -2.25620000 |
| C | 2.22319400  | 2.82694200  | -1.34494800 |
| C | 2.48589800  | 4.19466700  | -1.25706400 |
| C | 1.81797500  | 5.09513100  | -2.08847500 |
| H | 0.36327500  | 5.31277400  | -3.66679500 |
| H | -0.11610300 | 2.88957800  | -3.80958700 |

|              |             |             |             |
|--------------|-------------|-------------|-------------|
| H            | 2.75998300  | 2.13689000  | -0.70173400 |
| H            | 3.22155900  | 4.54780900  | -0.54146400 |
| H            | 2.02788600  | 6.15858200  | -2.02235200 |
| C            | 1.02881900  | 0.85618600  | -2.41655800 |
| H            | 1.97637800  | 0.36387600  | -2.64326900 |
| H            | 0.33179400  | 0.66177600  | -3.23091200 |
| N            | 0.48962100  | 0.12671900  | -1.20555500 |
| H            | 1.16607300  | 0.27706000  | -0.41061700 |
| H            | 0.96914500  | -3.10528400 | -2.35806300 |
| H            | -1.17283100 | 2.37824100  | -1.56632100 |
| C            | 5.19394200  | 3.96144100  | 1.76843600  |
| C            | 4.06252400  | 3.19173200  | 2.04670500  |
| C            | 4.03211400  | 1.81945100  | 1.76346300  |
| C            | 5.17129300  | 1.23648200  | 1.18905800  |
| C            | 6.29981700  | 2.00423600  | 0.89975200  |
| C            | 6.31707400  | 3.36960200  | 1.18948100  |
| H            | 5.19589000  | 5.02223800  | 2.00336200  |
| H            | 3.19050900  | 3.66056200  | 2.49589700  |
| H            | 5.18828800  | 0.17280500  | 0.96575100  |
| H            | 7.16987000  | 1.53278400  | 0.45155000  |
| H            | 7.19762000  | 3.96532500  | 0.96780800  |
| C            | 2.82066700  | 0.99119600  | 2.14237600  |
| H            | 1.99272100  | 1.66061300  | 2.39542000  |
| H            | 3.05171000  | 0.43676300  | 3.06610400  |
| N            | 2.35036800  | 0.07084500  | 1.08492200  |
| H            | 3.11921900  | -0.52187100 | 0.77837600  |
| H            | 1.68786900  | -0.56421900 | 1.54780900  |
| S            | -0.10529500 | -2.54789200 | 3.13095000  |
| O            | 0.45678200  | -1.13920000 | 2.92293200  |
| C            | -1.87875000 | -2.37606200 | 3.49269100  |
| H            | -2.39578500 | -2.13207500 | 2.55647500  |
| H            | -2.25372700 | -3.33277200 | 3.86661600  |
| H            | -2.01008100 | -1.58576900 | 4.23637900  |
| C            | 0.43074800  | -3.05109000 | 4.80734200  |
| H            | -0.01170700 | -4.01848600 | 5.05815100  |
| H            | 1.51894000  | -3.13407400 | 4.78871600  |
| H            | 0.12986900  | -2.28636600 | 5.52752100  |
| <b>Int8D</b> |             |             |             |
| C            | 8.61037000  | -1.23740000 | 1.86358800  |

|   |            |             |             |
|---|------------|-------------|-------------|
| C | 7.64632500 | -1.33943700 | 0.86183800  |
| C | 6.96777200 | -2.55061000 | 0.64970500  |
| C | 7.27930100 | -3.64740400 | 1.46252200  |
| C | 8.24654900 | -3.54616900 | 2.46499700  |
| C | 8.91386000 | -2.33873600 | 2.66899400  |
| H | 9.13245500 | -0.29612300 | 2.01296600  |
| H | 7.41353200 | -0.49135700 | 0.22339500  |
| H | 6.76153700 | -4.59127400 | 1.30603100  |
| H | 8.47604200 | -4.40873900 | 3.08475200  |
| H | 9.66682200 | -2.25564700 | 3.44786100  |
| C | 5.91226800 | -2.66915000 | -0.43108700 |
| H | 5.60990900 | -3.71903400 | -0.52679900 |
| H | 6.30656700 | -2.33045100 | -1.39351000 |
| N | 4.70714700 | -1.86142500 | -0.16982700 |
| H | 4.55151400 | -1.77469200 | 0.83055000  |
| C | 4.46630700 | -0.60490300 | -0.83826600 |
| S | 5.58082300 | 0.00748800  | -1.97003000 |
| C | 3.22657700 | -0.04040400 | -0.51183900 |
| C | 2.06215100 | -0.81526700 | 0.10094400  |
| O | 2.04884000 | -2.18413000 | -0.14655800 |
| C | 1.83349300 | -0.56828100 | 1.59765900  |
| H | 1.67859100 | 0.48916200  | 1.82158200  |
| H | 0.97421800 | -1.14732100 | 1.94756800  |
| H | 2.71658200 | -0.91147900 | 2.14309100  |
| H | 2.98707600 | -2.41021900 | -0.36865300 |
| C | 2.69254300 | 1.24042200  | -0.90402000 |
| C | 3.49052200 | 2.46465300  | -1.17531500 |
| C | 4.38464500 | 2.94430700  | -0.20699100 |
| C | 3.33331700 | 3.18991500  | -2.36430000 |
| C | 5.09348500 | 4.12447900  | -0.41788400 |
| H | 4.52793300 | 2.37383100  | 0.70557700  |
| C | 4.04885900 | 4.36746100  | -2.57901800 |
| H | 2.67391800 | 2.80646800  | -3.13717200 |
| C | 4.92769500 | 4.84157700  | -1.60460300 |
| H | 5.78307600 | 4.48147500  | 0.34184100  |
| H | 3.92562600 | 4.90990700  | -3.51216600 |
| H | 5.48612500 | 5.75811300  | -1.77172300 |
| C | 1.32666700 | 1.24357800  | -0.88530900 |
| C | 0.32680000 | 2.34481900  | -1.06206800 |

|   |             |             |             |
|---|-------------|-------------|-------------|
| H | -0.51963600 | 1.99916300  | -1.67162900 |
| C | -0.23146400 | 2.99512200  | 0.20531100  |
| C | 0.58269400  | 3.23776400  | 1.31942300  |
| C | -1.55647700 | 3.44694900  | 0.23809100  |
| C | 0.08198000  | 3.90162000  | 2.44072500  |
| H | 1.62059600  | 2.92047200  | 1.29587400  |
| C | -2.05921700 | 4.11766100  | 1.35556200  |
| H | -2.19927600 | 3.28638600  | -0.62346100 |
| C | -1.24261800 | 4.34298500  | 2.46544200  |
| H | 0.73116800  | 4.08250900  | 3.29280900  |
| H | -3.08735200 | 4.47058900  | 1.35484400  |
| H | -1.63050800 | 4.86442600  | 3.33562900  |
| S | -6.69705000 | -2.14339800 | -1.20602800 |
| O | -7.43563500 | -0.82278400 | -1.40888700 |
| C | -7.94627200 | -3.35018200 | -0.62899600 |
| H | -7.45238400 | -4.28914500 | -0.36582800 |
| H | -8.47932100 | -2.93466800 | 0.22951600  |
| H | -8.64186900 | -3.51408900 | -1.45371400 |
| C | -5.75922400 | -2.01458300 | 0.35337600  |
| H | -5.27148800 | -2.97153500 | 0.55699400  |
| H | -5.01367900 | -1.23303700 | 0.19009800  |
| H | -6.42695300 | -1.73559600 | 1.17191900  |
| C | -0.98901200 | -4.32515500 | -2.05197000 |
| C | -0.05631700 | -3.29117200 | -1.97945100 |
| C | -0.47154800 | -1.95234700 | -1.97895700 |
| C | -1.84392600 | -1.67463700 | -2.06151900 |
| C | -2.77908200 | -2.70888200 | -2.12665200 |
| C | -2.35331800 | -4.03782300 | -2.12389800 |
| H | -0.64801300 | -5.35647000 | -2.05719400 |
| H | 1.00101100  | -3.51534900 | -1.91396100 |
| H | -2.19946600 | -0.64813000 | -2.06979000 |
| H | -3.83598000 | -2.46991000 | -2.19491900 |
| H | -3.07791000 | -4.84513900 | -2.18720200 |
| C | 0.52580800  | -0.81451800 | -1.99528600 |
| H | 0.13889700  | -0.00670400 | -2.61906400 |
| H | 1.49022900  | -1.12192900 | -2.39966600 |
| N | 0.84400300  | -0.15020100 | -0.65191600 |
| H | -0.01791200 | -0.17474600 | -0.04321700 |
| H | 0.81099900  | 3.13474400  | -1.64670900 |



|   |             |             |             |
|---|-------------|-------------|-------------|
| C | -4.76468200 | -1.48244900 | 4.02997900  |
| C | -3.51147200 | -1.31081700 | 3.44051200  |
| C | -3.09380200 | -0.05106800 | 2.98896400  |
| C | -3.96108300 | 1.03719300  | 3.15305100  |
| C | -5.21524000 | 0.87121400  | 3.74401900  |
| C | -5.62240200 | -0.39050600 | 4.18168900  |
| H | -5.06576100 | -2.46426800 | 4.38488200  |
| H | -2.84244000 | -2.16332000 | 3.34163500  |
| H | -3.63802500 | 2.02267200  | 2.82711800  |
| H | -5.86939300 | 1.72886100  | 3.87600800  |
| H | -6.59344000 | -0.51937700 | 4.65102100  |
| C | -1.73724700 | 0.12804800  | 2.33075100  |
| H | -0.98783800 | -0.45399000 | 2.87792800  |
| H | -1.43187300 | 1.17585800  | 2.39181400  |
| N | -1.66876700 | -0.27458500 | 0.90898200  |
| H | -1.92047300 | -1.25828300 | 0.81860900  |
| H | -2.38365800 | 0.22625800  | 0.37205600  |
| S | -4.74984400 | 1.84074000  | -1.30127500 |
| O | -4.01884900 | 0.54360100  | -0.92738900 |
| C | -6.21517700 | 1.96924600  | -0.21753300 |
| H | -5.84416900 | 2.02666300  | 0.80753400  |
| H | -6.75527200 | 2.88556800  | -0.47167600 |
| H | -6.84217500 | 1.08414300  | -0.35654800 |
| C | -5.64581600 | 1.51153300  | -2.85698600 |
| H | -6.20834600 | 2.40806500  | -3.13220500 |
| H | -4.89232200 | 1.30267800  | -3.61874500 |
| H | -6.30941700 | 0.65482400  | -2.70778100 |

**TS6'D**

|   |             |            |             |
|---|-------------|------------|-------------|
| C | -5.64350800 | 3.46690400 | 1.72873600  |
| C | -5.15763800 | 2.20221000 | 1.40338200  |
| C | -5.66661300 | 1.49658200 | 0.30209200  |
| C | -6.67403400 | 2.09423700 | -0.46278000 |
| C | -7.16579000 | 3.36172600 | -0.13971600 |
| C | -6.65106100 | 4.05264900 | 0.95640200  |
| H | -5.24115200 | 3.99656500 | 2.58824000  |
| H | -4.37682200 | 1.74498800 | 2.00519200  |
| H | -7.07669100 | 1.56021300 | -1.32007700 |
| H | -7.94844200 | 3.80829300 | -0.74698200 |

|   |             |             |             |
|---|-------------|-------------|-------------|
| H | -7.03082800 | 5.03846600  | 1.20969000  |
| C | -5.14383300 | 0.11545400  | -0.03614000 |
| H | -5.72295300 | -0.30555800 | -0.87239500 |
| H | -5.28118200 | -0.57688700 | 0.80020400  |
| N | -3.72138700 | 0.15051100  | -0.33208300 |
| H | -3.44641100 | 0.82530800  | -1.03641000 |
| C | -2.87834800 | -0.95184500 | -0.25198500 |
| S | -3.48496200 | -2.43109500 | 0.38886800  |
| C | -1.55107600 | -0.73509000 | -0.68460800 |
| C | -0.94566200 | 0.64630800  | -0.82618100 |
| O | -1.58477900 | 1.34330400  | -1.91022100 |
| C | -1.00675300 | 1.51481500  | 0.43921400  |
| H | -0.62601700 | 0.96291600  | 1.30066000  |
| H | -0.43369900 | 2.44139000  | 0.31781600  |
| H | -2.04693700 | 1.76535600  | 0.65047000  |
| C | -0.59228300 | -1.68487400 | -1.16061200 |
| C | -0.84879900 | -3.12750000 | -1.43128900 |
| C | -0.24224600 | -4.14039100 | -0.67712800 |
| C | -1.65681200 | -3.49504600 | -2.51734700 |
| C | -0.43970600 | -5.48498800 | -0.99372300 |
| H | 0.35491500  | -3.86988300 | 0.18847000  |
| C | -1.85347100 | -4.83664900 | -2.83631400 |
| H | -2.13832100 | -2.71691300 | -3.10110900 |
| C | -1.24490600 | -5.83803600 | -2.07626900 |
| H | 0.03143600  | -6.25651000 | -0.39043800 |
| H | -2.48586200 | -5.10219300 | -3.67896300 |
| H | -1.40078700 | -6.88417800 | -2.32432700 |
| C | 0.59193700  | -1.09237900 | -1.51255500 |
| C | 1.71508200  | -1.68582200 | -2.31563200 |
| H | 1.82594600  | -1.18686000 | -3.29006000 |
| C | 3.10153500  | -1.76089200 | -1.67747800 |
| C | 3.31936600  | -2.52872700 | -0.52143600 |
| C | 4.20372600  | -1.12059300 | -2.25776500 |
| C | 4.59611400  | -2.65715500 | 0.02824100  |
| H | 2.47825700  | -3.04950900 | -0.07264500 |
| C | 5.48352500  | -1.23975100 | -1.70888100 |
| H | 4.06240900  | -0.53694000 | -3.16462300 |
| C | 5.68615400  | -2.01106600 | -0.56460800 |
| H | 4.74455200  | -3.27534300 | 0.90968500  |

|   |             |             |             |
|---|-------------|-------------|-------------|
| H | 6.32180600  | -0.73631700 | -2.18227800 |
| H | 6.68155500  | -2.11811700 | -0.14331200 |
| C | 0.46014400  | 4.95697900  | -2.62738300 |
| C | 0.37213100  | 3.57432000  | -2.80161100 |
| C | 1.15418500  | 2.69882500  | -2.03324900 |
| C | 2.04721900  | 3.24822000  | -1.10380600 |
| C | 2.13341500  | 4.62865400  | -0.92238700 |
| C | 1.33643200  | 5.48824000  | -1.68065200 |
| H | -0.15286900 | 5.61641500  | -3.23482700 |
| H | -0.30136000 | 3.16689300  | -3.55109200 |
| H | 2.69549700  | 2.59517800  | -0.52865400 |
| H | 2.83482100  | 5.02831600  | -0.19617900 |
| H | 1.40625000  | 6.56320000  | -1.54300500 |
| C | 1.10018300  | 1.20273700  | -2.27574400 |
| H | 2.12429400  | 0.85168600  | -2.42699400 |
| H | 0.53706200  | 0.99957400  | -3.19023100 |
| N | 0.54208600  | 0.35481500  | -1.17451600 |
| H | 1.29031900  | 0.39156100  | -0.00241000 |
| H | 1.40075600  | -2.70842300 | -2.54801300 |
| H | -1.44105000 | 2.29423600  | -1.78685500 |
| C | 4.93050700  | 3.81672600  | 2.07552100  |
| C | 3.70389700  | 3.16037800  | 2.17617400  |
| C | 3.58588200  | 1.79928000  | 1.85994700  |
| C | 4.73096700  | 1.10986600  | 1.44130600  |
| C | 5.95654300  | 1.76835200  | 1.32744400  |
| C | 6.06221300  | 3.12228000  | 1.64527400  |
| H | 5.00007900  | 4.87069900  | 2.32861300  |
| H | 2.82513000  | 3.70940100  | 2.50458400  |
| H | 4.68907200  | 0.05103800  | 1.20176600  |
| H | 6.82921800  | 1.21631100  | 0.99150400  |
| H | 7.01693300  | 3.63212200  | 1.55847000  |
| C | 2.25140800  | 1.11183700  | 2.06362800  |
| H | 1.45055200  | 1.85493300  | 2.07055000  |
| H | 2.22989800  | 0.62091700  | 3.04344400  |
| N | 1.89190000  | 0.07968200  | 1.04945400  |
| H | 2.70527500  | -0.46853600 | 0.76695900  |
| H | 1.25138200  | -0.58186600 | 1.53550200  |
| S | -0.28759000 | -2.54877900 | 3.16323500  |
| O | 0.37587800  | -1.17618700 | 2.96130100  |

|   |             |             |            |
|---|-------------|-------------|------------|
| C | -2.00213200 | -2.23143000 | 3.67084600 |
| H | -2.55463100 | -1.95155700 | 2.76652200 |
| H | -2.42455700 | -3.15848200 | 4.06758600 |
| H | -2.00363200 | -1.44021500 | 4.42513300 |
| C | 0.33864900  | -3.13227900 | 4.77978700 |
| H | -0.15609400 | -4.06965700 | 5.04594000 |
| H | 1.41200600  | -3.29812900 | 4.67130400 |
| H | 0.15545800  | -2.36629100 | 5.53700900 |

**TS6D**

|   |            |             |             |
|---|------------|-------------|-------------|
| C | 8.54600200 | -1.86544200 | 1.62083800  |
| C | 7.56062300 | -1.75982900 | 0.64035300  |
| C | 6.78672900 | -2.87758300 | 0.28732500  |
| C | 7.02654000 | -4.09353000 | 0.93931700  |
| C | 8.01467300 | -4.20020600 | 1.92072800  |
| C | 8.77663200 | -3.08414000 | 2.26545000  |
| H | 9.14182500 | -0.99408400 | 1.87947200  |
| H | 7.38251700 | -0.81963500 | 0.12464800  |
| H | 6.43485500 | -4.96662500 | 0.67237500  |
| H | 8.18688400 | -5.15297200 | 2.41438800  |
| H | 9.54641600 | -3.16239600 | 3.02838900  |
| C | 5.70801600 | -2.76982200 | -0.77118200 |
| H | 5.32624600 | -3.77287200 | -0.99907400 |
| H | 6.11480100 | -2.33365000 | -1.68886800 |
| N | 4.57237300 | -1.91694000 | -0.37579700 |
| H | 4.47801600 | -1.91087500 | 0.63606700  |
| C | 4.41154600 | -0.57113200 | -0.90299600 |
| S | 5.59513500 | 0.10600300  | -1.93145400 |
| C | 3.20078400 | 0.01276500  | -0.53536300 |
| C | 1.99398100 | -0.73927200 | 0.02855200  |
| O | 1.91746500 | -2.09496900 | -0.32670200 |
| C | 1.87427600 | -0.63088700 | 1.55754400  |
| H | 1.74246800 | 0.40343500  | 1.88540200  |
| H | 1.03945600 | -1.24423900 | 1.91488300  |
| H | 2.78574900 | -1.02059700 | 2.01975500  |
| H | 2.84855600 | -2.34582000 | -0.56278500 |
| C | 2.71948800 | 1.35157100  | -0.80276100 |
| C | 3.56577400 | 2.56406300  | -0.95630400 |
| C | 4.46721800 | 2.92049400  | 0.05843300  |

|   |             |             |             |
|---|-------------|-------------|-------------|
| C | 3.45164300  | 3.40307800  | -2.07369500 |
| C | 5.22018500  | 4.08822800  | -0.03478400 |
| H | 4.58282600  | 2.26061700  | 0.91295500  |
| C | 4.20995400  | 4.56988800  | -2.17111400 |
| H | 2.78958300  | 3.11663700  | -2.88551000 |
| C | 5.09319000  | 4.91994100  | -1.14962700 |
| H | 5.91466100  | 4.34633700  | 0.76002200  |
| H | 4.11691100  | 5.20061900  | -3.05100600 |
| H | 5.68556000  | 5.82738200  | -1.22556100 |
| C | 1.35471500  | 1.38644500  | -0.76115100 |
| C | 0.42092600  | 2.55504900  | -0.86883300 |
| H | -0.40743900 | 2.32443300  | -1.55542200 |
| C | -0.17496100 | 3.08642100  | 0.43439100  |
| C | 0.61302900  | 3.21871000  | 1.58709000  |
| C | -1.50390400 | 3.52632100  | 0.48593400  |
| C | 0.08358200  | 3.76187700  | 2.75869300  |
| H | 1.65243400  | 2.90684100  | 1.55079700  |
| C | -2.03790800 | 4.07335600  | 1.65630100  |
| H | -2.12560000 | 3.45613500  | -0.40291000 |
| C | -1.24661200 | 4.18802300  | 2.80090200  |
| H | 0.71338300  | 3.86017100  | 3.63845900  |
| H | -3.06862200 | 4.41896400  | 1.66899400  |
| H | -1.65693800 | 4.61468500  | 3.71156300  |
| S | -6.69182900 | -2.24114100 | -1.33585700 |
| O | -7.23063700 | -0.83890600 | -1.61068900 |
| C | -8.09278100 | -3.21118600 | -0.66849800 |
| H | -7.73361200 | -4.18785600 | -0.33379100 |
| H | -8.55060000 | -2.65912300 | 0.15576700  |
| H | -8.81463700 | -3.33753600 | -1.47710200 |
| C | -5.71509800 | -2.15292600 | 0.20363600  |
| H | -5.28514000 | -3.13574100 | 0.41272200  |
| H | -4.92828900 | -1.41703200 | 0.02032300  |
| H | -6.34521700 | -1.81976000 | 1.03182800  |
| C | -1.95579100 | -3.48242200 | -1.53012100 |
| C | -0.84016800 | -2.65663200 | -1.37647800 |
| C | -0.75641900 | -1.43061300 | -2.06192000 |
| C | -1.81840300 | -1.07290600 | -2.90497600 |
| C | -2.92668300 | -1.90505200 | -3.07128100 |
| C | -3.00162200 | -3.11420700 | -2.38048700 |

|   |             |             |             |
|---|-------------|-------------|-------------|
| H | -1.99497600 | -4.43110700 | -1.00074200 |
| H | -0.00944700 | -2.95590100 | -0.74680600 |
| H | -1.76622000 | -0.13499400 | -3.45335600 |
| H | -3.72941800 | -1.61016600 | -3.74116500 |
| H | -3.86080900 | -3.76536600 | -2.51302600 |
| C | 0.45193700  | -0.51653500 | -1.97295000 |
| H | 0.27216300  | 0.35031500  | -2.61221400 |
| H | 1.33971800  | -1.02390200 | -2.35883400 |
| N | 0.79808500  | 0.02569800  | -0.59620000 |
| H | -0.47558700 | -0.02647100 | 0.22992700  |
| H | 0.97178500  | 3.37992800  | -1.33371700 |
| C | -4.20757000 | -1.98910600 | 3.89345300  |
| C | -3.02660900 | -1.58815700 | 3.26857900  |
| C | -2.83850800 | -0.25399100 | 2.88248200  |
| C | -3.85213100 | 0.67489200  | 3.14582900  |
| C | -5.03135900 | 0.27852000  | 3.77810800  |
| C | -5.21354900 | -1.05485300 | 4.14970900  |
| H | -4.33496800 | -3.02452800 | 4.19551100  |
| H | -2.23739400 | -2.31649400 | 3.09359600  |
| H | -3.70360000 | 1.71420900  | 2.86679300  |
| H | -5.80397700 | 1.01197400  | 3.99070600  |
| H | -6.12753400 | -1.36175500 | 4.64974900  |
| C | -1.55646300 | 0.17308000  | 2.20491600  |
| H | -0.69499400 | -0.29651200 | 2.68363100  |
| H | -1.42034200 | 1.25307200  | 2.26086600  |
| N | -1.51018600 | -0.19689500 | 0.75457900  |
| H | -1.69726500 | -1.19460700 | 0.62943200  |
| H | -2.27294000 | 0.28651200  | 0.23891500  |
| S | -4.61989900 | 1.87517600  | -0.98129100 |
| O | -3.91776800 | 0.61730600  | -0.44697300 |
| C | -6.26204200 | 1.92798900  | -0.18768300 |
| H | -6.08809700 | 2.02221600  | 0.88569200  |
| H | -6.79787900 | 2.80716700  | -0.55597500 |
| H | -6.80228800 | 1.00613800  | -0.42233100 |
| C | -5.19001400 | 1.48847600  | -2.67006200 |
| H | -5.72013300 | 2.36076700  | -3.06256600 |
| H | -4.29742700 | 1.30007000  | -3.26890200 |
| H | -5.84138400 | 0.61034800  | -2.63526100 |

**Int9'D**

|   |             |             |             |
|---|-------------|-------------|-------------|
| C | 5.93758400  | -3.04331200 | 2.02730300  |
| C | 5.26977600  | -1.84707600 | 1.77342200  |
| C | 5.74785800  | -0.94387600 | 0.81168900  |
| C | 6.91236700  | -1.27577700 | 0.11072000  |
| C | 7.58700300  | -2.47334100 | 0.36224100  |
| C | 7.10117400  | -3.36156300 | 1.32075300  |
| H | 5.55473600  | -3.72793800 | 2.77958000  |
| H | 4.36669800  | -1.59964400 | 2.32495500  |
| H | 7.29420700  | -0.58731900 | -0.63912500 |
| H | 8.48976700  | -2.71148400 | -0.19362400 |
| H | 7.62311300  | -4.29362900 | 1.51824000  |
| C | 5.02777200  | 0.36330700  | 0.55198800  |
| H | 5.60316100  | 0.96852800  | -0.16553800 |
| H | 4.96586400  | 0.96610400  | 1.46271200  |
| N | 3.66766700  | 0.12321000  | 0.09027300  |
| H | 3.61318800  | -0.52019900 | -0.69230500 |
| C | 2.69820500  | 1.13154100  | 0.01734500  |
| S | 3.02265100  | 2.65117500  | 0.78485300  |
| C | 1.50503300  | 0.78897400  | -0.64080500 |
| C | 1.11034000  | -0.64329900 | -0.96438000 |
| O | 2.03837200  | -1.18638500 | -1.93917500 |
| C | 1.07371900  | -1.60213400 | 0.23838800  |
| H | 0.43364700  | -1.20345000 | 1.02813400  |
| H | 0.69107300  | -2.58762200 | -0.04943500 |
| H | 2.07665100  | -1.71409800 | 0.65268700  |
| C | 0.50633600  | 1.65267500  | -1.23206900 |
| C | 0.58819000  | 3.13151600  | -1.37116100 |
| C | 1.57711300  | 3.70360700  | -2.18725100 |
| C | -0.34575700 | 3.98564500  | -0.76830200 |
| C | 1.62657500  | 5.07940600  | -2.39187400 |
| H | 2.31233900  | 3.05533400  | -2.65249900 |
| C | -0.29695500 | 5.36701100  | -0.96839700 |
| H | -1.10420400 | 3.56193200  | -0.11597700 |
| C | 0.68988200  | 5.91924400  | -1.78312700 |
| H | 2.40180000  | 5.50045000  | -3.02605800 |
| H | -1.02969000 | 6.00919900  | -0.48655900 |
| H | 0.73200700  | 6.99308400  | -1.94192100 |
| C | -0.48759300 | 0.91912300  | -1.81530600 |

|   |             |             |             |
|---|-------------|-------------|-------------|
| C | -1.59120000 | 1.41788500  | -2.71163400 |
| H | -1.47644800 | 1.03441900  | -3.73640200 |
| C | -3.02496400 | 1.13685700  | -2.26565400 |
| C | -3.56172100 | 1.77317900  | -1.13374300 |
| C | -3.85545100 | 0.25901700  | -2.97467800 |
| C | -4.86966500 | 1.52186800  | -0.71292500 |
| H | -2.94558400 | 2.48160800  | -0.58787100 |
| C | -5.16360700 | -0.00271500 | -2.55560400 |
| H | -3.48067400 | -0.21740000 | -3.87734200 |
| C | -5.67437600 | 0.62146500  | -1.41839200 |
| H | -5.26359900 | 2.03498700  | 0.16003800  |
| H | -5.78319800 | -0.69053500 | -3.12428500 |
| H | -6.69023900 | 0.42244500  | -1.09080000 |
| C | 0.09202700  | -5.14293900 | -2.58740800 |
| C | 0.26462600  | -3.77803400 | -2.83179900 |
| C | -0.71030400 | -2.84715600 | -2.45115000 |
| C | -1.88492800 | -3.32718900 | -1.85299400 |
| C | -2.06339100 | -4.68830200 | -1.60630800 |
| C | -1.06829700 | -5.60119300 | -1.96420400 |
| H | 0.86145100  | -5.84657500 | -2.89159300 |
| H | 1.15661000  | -3.43302200 | -3.34887000 |
| H | -2.67960800 | -2.62478000 | -1.61374800 |
| H | -2.98452700 | -5.04080200 | -1.15019100 |
| H | -1.20544700 | -6.66152300 | -1.77452400 |
| C | -0.54812800 | -1.36690000 | -2.74055900 |
| H | -1.48547000 | -1.02105900 | -3.17570300 |
| H | 0.23759400  | -1.21923400 | -3.48923900 |
| N | -0.29314900 | -0.50716200 | -1.55484900 |
| H | -1.48218600 | -0.62813200 | -0.08766100 |
| H | -1.45858900 | 2.50104000  | -2.78547300 |
| H | 2.02599300  | -2.15170800 | -1.85740500 |
| C | -6.03737200 | -2.07375800 | 2.83751700  |
| C | -4.90345600 | -2.22421800 | 2.03768400  |
| C | -3.72330000 | -1.53381400 | 2.33746000  |
| C | -3.69163700 | -0.68180600 | 3.45215800  |
| C | -4.82782000 | -0.52848800 | 4.24560300  |
| C | -6.00070800 | -1.22462800 | 3.94328100  |
| H | -6.94513700 | -2.61891000 | 2.59653500  |
| H | -4.93520300 | -2.88741900 | 1.17672200  |



|   |             |             |            |
|---|-------------|-------------|------------|
| H | -2.78298600 | -0.13103500 | 3.68175900 |
| H | -4.79584600 | 0.13352000  | 5.10596900 |
| H | -6.88123000 | -1.10567100 | 4.56779800 |
| C | -2.50122200 | -1.71197300 | 1.46594100 |
| H | -2.65229000 | -2.51248000 | 0.73997800 |
| H | -1.62075800 | -1.96228400 | 2.06273000 |
| N | -2.15296400 | -0.45971900 | 0.71642900 |
| H | -2.98776300 | -0.02192000 | 0.31538100 |
| H | -1.69770900 | 0.23694800  | 1.40671700 |
| S | 0.25732100  | 1.76609400  | 2.33130200 |
| O | -1.07113200 | 0.98860600  | 2.62754900 |
| C | 1.46225700  | 1.00101700  | 3.46387200 |
| H | 1.68533600  | 0.01176000  | 3.06274200 |
| H | 2.37100300  | 1.60231500  | 3.45757600 |
| H | 1.00809700  | 0.92083800  | 4.45465600 |
| C | 0.06063800  | 3.34329700  | 3.22335300 |
| H | 1.00397600  | 3.88655100  | 3.15123600 |
| H | -0.72502500 | 3.90238100  | 2.71326800 |
| H | -0.22298500 | 3.14921100  | 4.26033700 |

Int9D

|   |             |            |             |
|---|-------------|------------|-------------|
| C | 0.81312000  | 7.02693900 | -0.86946500 |
| C | 1.80484700  | 6.05181500 | -0.75738000 |
| C | 1.70294100  | 5.02620800 | 0.19336400  |
| C | 0.58077600  | 5.00570300 | 1.03428100  |
| C | -0.40816700 | 5.98718600 | 0.93395100  |
| C | -0.29651400 | 6.99931500 | -0.02242100 |
| H | 0.91252800  | 7.81606300 | -1.60937400 |
| H | 2.67712900  | 6.08861800 | -1.40553800 |
| H | 0.49334300  | 4.21891100 | 1.77981500  |
| H | -1.25538900 | 5.97322400 | 1.61526600  |
| H | -1.06122600 | 7.76700400 | -0.09832200 |
| C | 2.77417800  | 3.96622200 | 0.29543200  |
| H | 2.77730200  | 3.51841300 | 1.29360200  |
| H | 3.77281300  | 4.37869500 | 0.11140100  |
| N | 2.52333300  | 2.85718700 | -0.66696900 |
| H | 2.55448000  | 3.25942700 | -1.60465500 |
| C | 3.60820700  | 1.81625000 | -0.60569800 |
| S | 5.17542300  | 2.33951400 | -1.04865300 |

|   |             |             |             |
|---|-------------|-------------|-------------|
| C | 3.13130400  | 0.59942300  | -0.17620300 |
| C | 1.64842200  | 0.22302000  | -0.05204600 |
| O | 0.80336600  | 1.31797100  | 0.27355500  |
| C | 1.14376500  | -0.41723700 | -1.35829800 |
| H | 1.73088200  | -1.30186900 | -1.61417400 |
| H | 0.09901600  | -0.72315200 | -1.23737100 |
| H | 1.21822700  | 0.30211400  | -2.18000500 |
| H | 1.35327900  | 2.12048800  | -0.17698500 |
| C | 3.82522100  | -0.61410200 | 0.26160500  |
| C | 5.23257100  | -0.99045900 | -0.02088400 |
| C | 5.70382100  | -1.05830700 | -1.34235800 |
| C | 6.11249300  | -1.33090700 | 1.01744700  |
| C | 7.00087500  | -1.48460600 | -1.61494200 |
| H | 5.04628700  | -0.75959300 | -2.15166100 |
| C | 7.41683200  | -1.74837100 | 0.74609100  |
| H | 5.77414100  | -1.24389300 | 2.04587300  |
| C | 7.86311600  | -1.83324300 | -0.57198900 |
| H | 7.34622400  | -1.53117900 | -2.64404900 |
| H | 8.08397000  | -2.00019500 | 1.56611000  |
| H | 8.87789200  | -2.15688100 | -0.78648300 |
| C | 2.94280300  | -1.40957400 | 0.93720300  |
| C | 3.13440700  | -2.80079800 | 1.47559300  |
| H | 2.83070000  | -2.85655100 | 2.53046200  |
| C | 2.36552700  | -3.86073700 | 0.69733300  |
| C | 2.73282400  | -4.17175700 | -0.62038200 |
| C | 1.29678400  | -4.55805600 | 1.27205900  |
| C | 2.05475600  | -5.15660900 | -1.33786500 |
| H | 3.56287900  | -3.63872200 | -1.07679200 |
| C | 0.61133300  | -5.54350500 | 0.55582700  |
| H | 1.00591800  | -4.33542200 | 2.29605400  |
| C | 0.98980800  | -5.84786400 | -0.75218500 |
| H | 2.36427100  | -5.39289200 | -2.35249500 |
| H | -0.21099000 | -6.07825200 | 1.02377100  |
| H | 0.46834100  | -6.62331500 | -1.30665000 |
| S | -5.21237700 | -3.35089300 | 0.62402400  |
| O | -4.75304600 | -4.09136100 | -0.62730400 |
| C | -6.78677300 | -4.12670700 | 1.14152500  |
| H | -7.21926600 | -3.55790500 | 1.96874700  |
| H | -7.47027300 | -4.16225600 | 0.28977400  |

|   |             |             |             |
|---|-------------|-------------|-------------|
| H | -6.55232500 | -5.14043200 | 1.47056600  |
| C | -5.90537400 | -1.75196400 | 0.07729700  |
| H | -6.30743800 | -1.21373800 | 0.93975600  |
| H | -5.07021600 | -1.20389900 | -0.36546900 |
| H | -6.68419000 | -1.92896000 | -0.66907100 |
| C | -2.03750500 | 1.11012900  | 3.53895100  |
| C | -0.67249900 | 0.97300300  | 3.27157200  |
| C | -0.17551800 | -0.16501400 | 2.62443900  |
| C | -1.07870000 | -1.17151700 | 2.25505400  |
| C | -2.44302700 | -1.04259800 | 2.52081800  |
| C | -2.92978500 | 0.10193800  | 3.16055800  |
| H | -2.40346700 | 1.99996300  | 4.04416200  |
| H | 0.01721000  | 1.76168600  | 3.56089100  |
| H | -0.69503400 | -2.05009300 | 1.74571700  |
| H | -3.12649800 | -1.83522600 | 2.22940300  |
| H | -3.99068400 | 0.20477300  | 3.37152600  |
| C | 1.30865700  | -0.32638800 | 2.36047500  |
| H | 1.70021200  | -1.06255300 | 3.07184000  |
| H | 1.82986400  | 0.61874800  | 2.56770800  |
| N | 1.61665800  | -0.83628600 | 1.00924700  |
| H | -0.71020200 | 1.20348400  | 0.04324100  |
| H | 4.20085900  | -3.04033200 | 1.44953300  |
| C | -5.27178800 | 4.51461000  | -0.22530600 |
| C | -3.93103800 | 4.12749600  | -0.26742100 |
| C | -3.56216000 | 2.90107000  | -0.83177000 |
| C | -4.55717200 | 2.06359900  | -1.35799300 |
| C | -5.89601800 | 2.44954000  | -1.31016800 |
| C | -6.25676100 | 3.67527800  | -0.74486000 |
| H | -5.54407900 | 5.47091600  | 0.21119100  |
| H | -3.16254300 | 4.78611100  | 0.12845500  |
| H | -4.27795800 | 1.10763000  | -1.79326900 |
| H | -6.65993400 | 1.79653300  | -1.72257000 |
| H | -7.30007300 | 3.97530400  | -0.71436500 |
| C | -2.10522300 | 2.50389900  | -0.88213800 |
| H | -1.47068700 | 3.30968500  | -0.50607600 |
| H | -1.78555600 | 2.27991200  | -1.90385700 |
| N | -1.79290400 | 1.27927300  | -0.07543100 |
| H | -2.19629000 | 1.33435700  | 0.86418300  |
| H | -2.16919400 | 0.41999100  | -0.53697100 |

|   |             |             |             |
|---|-------------|-------------|-------------|
| S | -2.28111300 | -1.82414000 | -2.43250800 |
| O | -2.96183500 | -0.90579800 | -1.38507200 |
| C | -3.64765600 | -2.62162200 | -3.33570300 |
| H | -4.18084000 | -1.83258800 | -3.86927000 |
| H | -3.21952600 | -3.32588300 | -4.05392200 |
| H | -4.29693500 | -3.13290900 | -2.61982300 |
| C | -1.68153600 | -3.29028400 | -1.53690600 |
| H | -1.22573600 | -3.97059600 | -2.26066600 |
| H | -0.91363200 | -2.95338600 | -0.83926600 |
| H | -2.52307000 | -3.76129300 | -1.02204500 |

**Int10D**

|   |             |             |             |
|---|-------------|-------------|-------------|
| C | -0.49306400 | 5.19225600  | 2.73280400  |
| C | 0.32415900  | 4.36167400  | 1.96685800  |
| C | 1.16887900  | 3.42569500  | 2.58576800  |
| C | 1.17349300  | 3.35063500  | 3.98468400  |
| C | 0.35635900  | 4.18271600  | 4.75338600  |
| C | -0.48111800 | 5.10614800  | 4.12759100  |
| H | -1.13908200 | 5.91399100  | 2.24010800  |
| H | 0.32164800  | 4.42893700  | 0.88236200  |
| H | 1.82899400  | 2.63516700  | 4.47790000  |
| H | 0.37667600  | 4.11115700  | 5.83764900  |
| H | -1.11777900 | 5.75629900  | 4.72126000  |
| C | 2.03540000  | 2.49941200  | 1.75248400  |
| H | 2.82753700  | 2.07649100  | 2.38234100  |
| H | 2.50349300  | 3.04449800  | 0.92983500  |
| N | 1.31102400  | 1.37341800  | 1.14115700  |
| H | 0.82658900  | 0.82028600  | 1.83974400  |
| C | 0.51904100  | 1.57285200  | -0.03680000 |
| S | 1.26423000  | 2.53493000  | -1.28860900 |
| C | -0.67940800 | 0.88915100  | -0.14977800 |
| C | -1.28433000 | -0.00604000 | 0.93392600  |
| O | -0.27662300 | -0.95187600 | 1.40114300  |
| C | -1.84474100 | 0.75714000  | 2.14503100  |
| H | -2.65404600 | 1.40617300  | 1.80366400  |
| H | -2.25932200 | 0.06990900  | 2.89079200  |
| H | -1.08321800 | 1.38540900  | 2.61404800  |
| C | -1.59023900 | 0.79254000  | -1.30064500 |
| C | -1.67272700 | 1.70812100  | -2.46864300 |

|   |             |             |             |
|---|-------------|-------------|-------------|
| C | -1.90918200 | 3.08070400  | -2.27737000 |
| C | -1.61207600 | 1.22805200  | -3.78518300 |
| C | -2.08936600 | 3.93455400  | -3.36066400 |
| H | -1.94129800 | 3.46958600  | -1.26493600 |
| C | -1.78551600 | 2.08465200  | -4.87529300 |
| H | -1.40967400 | 0.17441400  | -3.95703400 |
| C | -2.02734500 | 3.44109500  | -4.66750800 |
| H | -2.27332700 | 4.99148200  | -3.18742100 |
| H | -1.72867800 | 1.68839100  | -5.88581800 |
| H | -2.16398500 | 4.10986700  | -5.51286000 |
| C | -2.52652100 | -0.17178200 | -1.05646900 |
| C | -3.72043600 | -0.54512700 | -1.89452000 |
| H | -3.64933100 | -1.58493200 | -2.24495100 |
| C | -5.06318900 | -0.36406500 | -1.19878000 |
| C | -5.39350100 | 0.85762400  | -0.59457200 |
| C | -6.00763300 | -1.39614900 | -1.17234300 |
| C | -6.63178900 | 1.03809000  | 0.01891800  |
| H | -4.66870500 | 1.66697300  | -0.61074800 |
| C | -7.25033400 | -1.22008200 | -0.55809500 |
| H | -5.77016500 | -2.34863300 | -1.64142100 |
| C | -7.56625700 | -0.00144500 | 0.04093300  |
| H | -6.87028400 | 1.99273700  | 0.47990800  |
| H | -7.96816800 | -2.03576000 | -0.54848300 |
| H | -8.53100900 | 0.13991200  | 0.51979600  |
| C | -2.49766900 | -3.96511800 | 3.79646900  |
| C | -2.13654400 | -3.54102700 | 2.51350300  |
| C | -2.90285700 | -2.58945300 | 1.82911600  |
| C | -4.04462500 | -2.06676000 | 2.45539100  |
| C | -4.40603800 | -2.48878600 | 3.73329000  |
| C | -3.63331400 | -3.43865200 | 4.40912800  |
| H | -1.89192700 | -4.70539000 | 4.31166200  |
| H | -1.25750100 | -3.96342800 | 2.03096100  |
| H | -4.63953500 | -1.32478500 | 1.93157200  |
| H | -5.29453000 | -2.07813000 | 4.20463900  |
| H | -3.91769300 | -3.76472300 | 5.40543700  |
| C | -2.53129400 | -2.16547500 | 0.41803700  |
| H | -3.33711300 | -2.48496600 | -0.24915600 |
| H | -1.62800400 | -2.70902800 | 0.10213400  |
| N | -2.39666500 | -0.71951200 | 0.24399500  |

|   |             |             |             |
|---|-------------|-------------|-------------|
| H | 1.24731200  | -1.30592100 | 0.30584200  |
| H | -3.69394300 | 0.07326100  | -2.79688500 |
| H | -0.64865700 | -1.44376200 | 2.14989700  |
| C | -0.29415500 | -3.85593100 | -2.95713700 |
| C | 0.22717800  | -2.63139000 | -2.53449200 |
| C | 1.54522700  | -2.54451500 | -2.06808100 |
| C | 2.32963500  | -3.70584400 | -2.01940500 |
| C | 1.80606900  | -4.92880200 | -2.43768900 |
| C | 0.49494600  | -5.00575700 | -2.91252800 |
| H | -1.31513500 | -3.90941200 | -3.32389600 |
| H | -0.39167300 | -1.73811900 | -2.55656600 |
| H | 3.34328500  | -3.65065100 | -1.63217600 |
| H | 2.42281300  | -5.82213500 | -2.39658700 |
| H | 0.09069600  | -5.95768200 | -3.24480300 |
| C | 2.10483500  | -1.21394300 | -1.62407800 |
| H | 1.50085700  | -0.37506000 | -1.97429500 |
| H | 3.13117700  | -1.06681400 | -1.96358600 |
| N | 2.16285100  | -1.10213600 | -0.12699000 |
| H | 2.90507800  | -1.72641000 | 0.24892700  |
| H | 2.37892300  | -0.12638800 | 0.15898200  |
| S | 4.89809600  | 1.86524800  | -0.92559900 |
| O | 4.62792600  | 0.46398400  | -0.36015100 |
| C | 4.47566100  | 1.81807100  | -2.69758600 |
| H | 3.38659600  | 1.73945100  | -2.73665000 |
| H | 4.79641200  | 2.75509600  | -3.16072100 |
| H | 4.96668100  | 0.96043900  | -3.16502200 |
| C | 6.71899800  | 1.94011200  | -1.14442600 |
| H | 6.98847100  | 2.86447500  | -1.66183400 |
| H | 7.16581500  | 1.93539100  | -0.14835900 |
| H | 7.05642200  | 1.06636800  | -1.70737000 |
| S | 5.70750900  | -2.35493200 | 0.87478400  |
| O | 4.25462600  | -2.79974100 | 0.66479700  |
| C | 6.45429700  | -3.69017300 | 1.87492500  |
| H | 6.47795200  | -4.58429900 | 1.24972900  |
| H | 7.47138500  | -3.40930500 | 2.16032500  |
| H | 5.83470200  | -3.87112500 | 2.75618600  |
| C | 5.68407600  | -1.07366300 | 2.17188900  |
| H | 6.71087300  | -0.84796700 | 2.47257800  |
| H | 5.22143700  | -0.20080500 | 1.70666900  |

|   |            |             |            |
|---|------------|-------------|------------|
| H | 5.09881200 | -1.43367500 | 3.02172300 |
|---|------------|-------------|------------|

**TS7D**

|   |             |             |             |
|---|-------------|-------------|-------------|
| C | 2.02698900  | 5.25280200  | -3.25404800 |
| C | 1.80298200  | 3.88428000  | -3.11771400 |
| C | 2.76942700  | 3.05230700  | -2.53183100 |
| C | 3.96466100  | 3.63154500  | -2.09133400 |
| C | 4.19546100  | 5.00261200  | -2.22887600 |
| C | 3.22527000  | 5.81881300  | -2.80898800 |
| H | 1.26752900  | 5.88035700  | -3.71232700 |
| H | 0.87384400  | 3.44422100  | -3.46789700 |
| H | 4.72646100  | 2.99805900  | -1.64163100 |
| H | 5.13096100  | 5.43212400  | -1.88008800 |
| H | 3.39902600  | 6.88584000  | -2.91498000 |
| C | 2.53771300  | 1.55910600  | -2.41564600 |
| H | 3.39212400  | 1.09407600  | -1.89688200 |
| H | 2.50086000  | 1.08798000  | -3.40355300 |
| N | 1.28129000  | 1.25374700  | -1.76027000 |
| H | 1.13431400  | 1.67842900  | -0.85090800 |
| C | 0.52274100  | 0.10924000  | -1.98314600 |
| S | 1.09711500  | -1.02654200 | -3.15293200 |
| C | -0.65481300 | -0.01755500 | -1.21429300 |
| C | -1.18943500 | 1.07480400  | -0.35506600 |
| O | 0.00098100  | 1.33981000  | 0.81093300  |
| C | -1.40683700 | 2.48132900  | -0.91335000 |
| H | -2.24142300 | 2.44986400  | -1.61824000 |
| H | -1.67197700 | 3.19607700  | -0.12894400 |
| H | -0.52680100 | 2.84521200  | -1.43887200 |
| C | -1.45074200 | -1.20948100 | -0.90857700 |
| C | -1.37690500 | -2.57116800 | -1.49924200 |
| C | -1.64768700 | -2.79211900 | -2.86216300 |
| C | -1.12708600 | -3.69393900 | -0.69300500 |
| C | -1.67929600 | -4.08020500 | -3.38803700 |
| H | -1.82332300 | -1.93754700 | -3.50480400 |
| C | -1.14857800 | -4.98976000 | -1.22050500 |
| H | -0.92183700 | -3.55015400 | 0.36468500  |
| C | -1.42634800 | -5.18724800 | -2.57116000 |
| H | -1.89723600 | -4.22284500 | -4.44290200 |
| H | -0.95411800 | -5.83962100 | -0.57115100 |

|   |             |             |             |
|---|-------------|-------------|-------------|
| H | -1.44987100 | -6.19134700 | -2.98582000 |
| C | -2.40161100 | -0.87480000 | 0.01863000  |
| C | -3.53984000 | -1.70902300 | 0.53606500  |
| H | -3.57004200 | -1.72712100 | 1.63521200  |
| C | -4.92336200 | -1.31186600 | 0.02749700  |
| C | -5.15253100 | -1.13711100 | -1.34472900 |
| C | -5.99759100 | -1.14982300 | 0.90898700  |
| C | -6.42205700 | -0.80847400 | -1.81839900 |
| H | -4.32479100 | -1.25939600 | -2.03742500 |
| C | -7.27037200 | -0.81769300 | 0.43886100  |
| H | -5.83729000 | -1.28469500 | 1.97664000  |
| C | -7.48667900 | -0.64511600 | -0.92766700 |
| H | -6.58175800 | -0.68009100 | -2.88556000 |
| H | -8.08932100 | -0.69060500 | 1.14153200  |
| H | -8.47463200 | -0.38544200 | -1.29714700 |
| C | -4.53639700 | 4.53322200  | 2.04464300  |
| C | -3.69685200 | 3.42420400  | 2.16956600  |
| C | -3.78183500 | 2.35341000  | 1.27237900  |
| C | -4.72775300 | 2.41234300  | 0.24105700  |
| C | -5.56501700 | 3.51980700  | 0.11270700  |
| C | -5.47374800 | 4.58408700  | 1.01324000  |
| H | -4.45315100 | 5.35667000  | 2.74866200  |
| H | -2.96565600 | 3.39036000  | 2.97480000  |
| H | -4.79869400 | 1.58806500  | -0.46063800 |
| H | -6.29355900 | 3.55040800  | -0.69264900 |
| H | -6.12649200 | 5.44619900  | 0.90953300  |
| C | -2.90140500 | 1.12805100  | 1.47668500  |
| H | -3.50671600 | 0.36242600  | 1.96895800  |
| H | -2.09433800 | 1.37153600  | 2.18069900  |
| N | -2.33879100 | 0.52340500  | 0.27577000  |
| H | 1.20447200  | 0.26158300  | 1.14640100  |
| H | -3.34110600 | -2.74135800 | 0.23288400  |
| H | -0.13464300 | 2.19753000  | 1.23884800  |
| C | -1.16034000 | -1.21499700 | 4.63719800  |
| C | -0.56430400 | -1.42834000 | 3.39348800  |
| C | 0.82983700  | -1.46189400 | 3.27242700  |
| C | 1.62153800  | -1.27022000 | 4.41325900  |
| C | 1.02442200  | -1.05221300 | 5.65453700  |
| C | -0.36707300 | -1.02840100 | 5.76997500  |



|   |             |             |             |
|---|-------------|-------------|-------------|
| H | -2.24305000 | -1.19649600 | 4.72125700  |
| H | -1.17684800 | -1.56281200 | 2.50612200  |
| H | 2.70414800  | -1.26962000 | 4.32097600  |
| H | 1.64577000  | -0.90460800 | 6.53315800  |
| H | -0.83054900 | -0.86486500 | 6.73864300  |
| C | 1.46713500  | -1.70074000 | 1.92475400  |
| H | 0.74962300  | -2.12041400 | 1.21795800  |
| H | 2.32244200  | -2.37639600 | 1.99669400  |
| N | 1.98517900  | -0.43791600 | 1.30430100  |
| H | 2.73147600  | -0.03870600 | 1.90419300  |
| H | 2.44900700  | -0.68835600 | 0.41064900  |
| S | 3.99770600  | -2.43005600 | -1.65024800 |
| O | 3.87431600  | -1.58863500 | -0.36054800 |
| C | 2.72316300  | -3.72549200 | -1.55258900 |
| H | 1.76389100  | -3.22518700 | -1.70006500 |
| H | 2.88865700  | -4.43633200 | -2.36649200 |
| H | 2.78656600  | -4.22141900 | -0.58064100 |
| C | 5.43669100  | -3.51641000 | -1.31539000 |
| H | 5.54204100  | -4.23922700 | -2.12846600 |
| H | 6.32174700  | -2.87884100 | -1.27537900 |
| H | 5.29991500  | -4.02429000 | -0.35775100 |
| S | 5.69034300  | 0.12257700  | 2.43514100  |
| O | 4.22891900  | 0.19223000  | 2.88965400  |
| C | 6.53122200  | 1.49875000  | 3.29376300  |
| H | 6.52181200  | 1.26643800  | 4.35992600  |
| H | 7.56195500  | 1.57428500  | 2.93810500  |
| H | 5.98359700  | 2.42610500  | 3.11067800  |
| C | 5.76570400  | 0.80943800  | 0.74804000  |
| H | 6.81266900  | 0.87763200  | 0.43965400  |
| H | 5.22131800  | 0.10767600  | 0.10875500  |
| H | 5.29217300  | 1.79470400  | 0.73327200  |

**Pr**

|   |             |             |             |
|---|-------------|-------------|-------------|
| C | -5.98875300 | 1.34168100  | 0.25058000  |
| C | -5.08656100 | 0.28409500  | 0.36065800  |
| C | -4.97166000 | -0.66366800 | -0.66717900 |
| C | -5.77970400 | -0.53045400 | -1.80195400 |
| C | -6.68838700 | 0.52365400  | -1.91015800 |
| C | -6.79336700 | 1.46339900  | -0.88450300 |

|   |             |             |             |
|---|-------------|-------------|-------------|
| H | -6.06611800 | 2.06832300  | 1.05414500  |
| H | -4.46832900 | 0.19138900  | 1.24985500  |
| H | -5.69774200 | -1.25900400 | -2.60434100 |
| H | -7.31092500 | 0.61105100  | -2.79592800 |
| H | -7.49882600 | 2.28505600  | -0.96756200 |
| C | -3.99249100 | -1.81028800 | -0.54897000 |
| H | -4.11864000 | -2.52263700 | -1.37144500 |
| H | -4.15469600 | -2.38138700 | 0.37430400  |
| N | -2.61569300 | -1.31888800 | -0.55107000 |
| H | -2.48461800 | -0.31868300 | -0.62467000 |
| C | -1.52188500 | -2.09365600 | -0.41510400 |
| S | -1.62750700 | -3.76945500 | -0.30320000 |
| C | -0.25202200 | -1.34290400 | -0.34666200 |
| C | 0.89598100  | -1.60625900 | -1.08392000 |
| C | 1.17344500  | -2.65617000 | -2.11204300 |
| H | 0.31795700  | -3.32703800 | -2.18315400 |
| H | 1.35941500  | -2.21845000 | -3.10131100 |
| H | 2.04581800  | -3.26538400 | -1.84871400 |
| H | 3.06294700  | 0.95175700  | 1.12520100  |
| C | -0.00404400 | -0.15319900 | 0.43762200  |
| C | -0.89585300 | 0.44565000  | 1.45522700  |
| C | -1.13691900 | 1.83030600  | 1.49898600  |
| C | -1.51655200 | -0.36582100 | 2.42398600  |
| C | -1.95610900 | 2.38631300  | 2.48335500  |
| H | -0.68674600 | 2.47419400  | 0.74929200  |
| C | -2.33993600 | 0.18955100  | 3.40149200  |
| H | -1.33678000 | -1.43657200 | 2.41144100  |
| C | -2.56205900 | 1.56945600  | 3.43780700  |
| H | -2.12511700 | 3.45933700  | 2.49712100  |
| H | -2.80103600 | -0.45559600 | 4.14412100  |
| H | -3.19942900 | 2.00127100  | 4.20392400  |
| C | 1.29060900  | 0.25337200  | 0.15620800  |
| C | 2.10981300  | 1.35467400  | 0.75999200  |
| H | 1.57451900  | 1.70440800  | 1.65012900  |
| C | 2.40305400  | 2.55620300  | -0.13642400 |
| C | 1.56732000  | 2.91307600  | -1.20230700 |
| C | 3.52254700  | 3.35739100  | 0.13005700  |
| C | 1.83772800  | 4.04503600  | -1.97452200 |
| H | 0.70511900  | 2.29360000  | -1.43182500 |

|   |            |             |             |
|---|------------|-------------|-------------|
| C | 3.79394900 | 4.48908700  | -0.63794000 |
| H | 4.18552800 | 3.09089000  | 0.94991600  |
| C | 2.95039900 | 4.83813100  | -1.69464900 |
| H | 1.17758300 | 4.30415100  | -2.79754500 |
| H | 4.66663100 | 5.09615100  | -0.41404100 |
| H | 3.16169400 | 5.71729500  | -2.29617700 |
| C | 4.84693400 | -2.80300900 | 1.38016900  |
| C | 3.86538000 | -2.19629700 | 0.59327800  |
| C | 4.21815900 | -1.23505300 | -0.35979500 |
| C | 5.56765800 | -0.88776300 | -0.50649200 |
| C | 6.54764700 | -1.49647700 | 0.27611900  |
| C | 6.18908900 | -2.45800800 | 1.22325600  |
| H | 4.55800600 | -3.54640900 | 2.11732600  |
| H | 2.82272000 | -2.46773500 | 0.72661900  |
| H | 5.85196800 | -0.13454200 | -1.23791500 |
| H | 7.58938200 | -1.21526900 | 0.15140300  |
| H | 6.95047300 | -2.93058000 | 1.83665800  |
| C | 3.18784700 | -0.58181900 | -1.27235400 |
| H | 3.20063900 | -1.07053500 | -2.25112300 |
| H | 3.45675300 | 0.46359100  | -1.44647800 |
| N | 1.81775400 | -0.62579000 | -0.77763600 |

H<sub>2</sub>O

|   |             |             |            |
|---|-------------|-------------|------------|
| O | 0.00000000  | 0.11793200  | 0.00000000 |
| H | 0.76889600  | -0.46143300 | 0.00000000 |
| H | -0.76889600 | -0.48202200 | 0.00000000 |

**Re'**

|   |            |            |             |
|---|------------|------------|-------------|
| C | 4.95343300 | 3.23304600 | -1.00142800 |
| C | 4.41804300 | 2.09633900 | -1.60971100 |
| C | 3.85302300 | 1.07418400 | -0.83934000 |
| C | 3.82835100 | 1.21258900 | 0.55654200  |
| C | 4.35496100 | 2.35128200 | 1.16469500  |
| C | 4.92109200 | 3.36383000 | 0.38688900  |
| H | 5.39035900 | 4.01687000 | -1.61309400 |
| H | 4.43977300 | 2.00081800 | -2.69212100 |
| H | 3.39374600 | 0.42597200 | 1.16826900  |
| H | 4.32796500 | 2.44572100 | 2.24627400  |
| H | 5.33435900 | 4.24897800 | 0.86125500  |

|   |             |             |             |
|---|-------------|-------------|-------------|
| C | 3.29263400  | -0.16576200 | -1.49955300 |
| H | 3.83933600  | -1.06621600 | -1.19471800 |
| H | 3.38784500  | -0.10786400 | -2.59031000 |
| N | 1.88747900  | -0.35695700 | -1.14125800 |
| H | 1.41690200  | 0.41923400  | -0.68920700 |
| C | 1.16961500  | -1.45742400 | -1.40905500 |
| S | 1.78421400  | -2.78234600 | -2.22004900 |
| C | -0.31071100 | -1.33806200 | -1.02802500 |
| C | -1.12676200 | -2.65988700 | -0.90078100 |
| O | -2.19931700 | -2.70163800 | -1.47272200 |
| C | -0.67805200 | -3.79123000 | -0.00253000 |
| H | 0.39053300  | -3.98821500 | -0.08640000 |
| H | -0.89977200 | -3.52689600 | 1.03768800  |
| H | -1.24850300 | -4.68321900 | -0.26568300 |
| H | -0.77370400 | -0.87202100 | -1.90386300 |
| C | -0.63174300 | -0.40385900 | 0.15905500  |
| C | -0.19873200 | -0.69961200 | 1.56050300  |
| C | 0.90438200  | -1.52108800 | 1.84954300  |
| C | -0.89522800 | -0.12574100 | 2.64021400  |
| C | 1.29848100  | -1.75278800 | 3.16888300  |
| H | 1.46455200  | -1.98881300 | 1.04867800  |
| C | -0.49975500 | -0.35642800 | 3.95409300  |
| H | -1.75828600 | 0.50055300  | 2.43789800  |
| C | 0.60207800  | -1.17092100 | 4.22685600  |
| H | 2.15334200  | -2.39359000 | 3.36440000  |
| H | -1.05902400 | 0.09497300  | 4.76837500  |
| H | 0.90855900  | -1.35432200 | 5.25222900  |
| C | -1.36558100 | 0.65907800  | -0.11533400 |
| C | -2.12370700 | 1.69062000  | -0.40968100 |
| H | -1.63890900 | 2.64207900  | -0.63592800 |
| C | -3.60102900 | 1.68747500  | -0.45325100 |
| C | -4.33609000 | 0.49151800  | -0.52831900 |
| C | -4.29242700 | 2.90862500  | -0.43173100 |
| C | -5.72721900 | 0.52394600  | -0.55871700 |
| H | -3.81059300 | -0.45705300 | -0.59211400 |
| C | -5.68589400 | 2.93684800  | -0.46263600 |
| H | -3.73163700 | 3.83875400  | -0.38521200 |
| C | -6.40804900 | 1.74440100  | -0.52203500 |
| H | -6.28287700 | -0.40694000 | -0.62319900 |

|   |             |            |             |
|---|-------------|------------|-------------|
| H | -6.20643300 | 3.88992700 | -0.44237500 |
| H | -7.49344700 | 1.76472500 | -0.55036100 |

**Com1W'**

|   |             |             |             |
|---|-------------|-------------|-------------|
| C | -7.36395000 | 0.81588000  | -0.43782200 |
| C | -6.50016200 | 0.47566400  | 0.60470200  |
| C | -5.42279200 | -0.38914500 | 0.38415700  |
| C | -5.22088600 | -0.90584700 | -0.90434800 |
| C | -6.07781000 | -0.56001600 | -1.94828700 |
| C | -7.15333800 | 0.30039700  | -1.71665500 |
| H | -8.19705600 | 1.48689600  | -0.25070900 |
| H | -6.66405600 | 0.88410700  | 1.59843600  |
| H | -4.38839000 | -1.57982000 | -1.09050100 |
| H | -5.90887100 | -0.96610500 | -2.94120100 |
| H | -7.82272400 | 0.56688300  | -2.52914000 |
| C | -4.49883500 | -0.77111100 | 1.51899900  |
| H | -4.52671400 | -1.84954900 | 1.71600600  |
| H | -4.80067000 | -0.28285800 | 2.45302600  |
| N | -3.11508300 | -0.41224400 | 1.20716100  |
| H | -2.95990700 | 0.18936700  | 0.40508600  |
| C | -2.04539400 | -0.79412400 | 1.91522100  |
| S | -2.12335100 | -1.74842900 | 3.28486400  |
| C | -0.72281500 | -0.18740500 | 1.42420200  |
| C | 0.51862100  | -0.88955300 | 2.02618600  |
| O | 1.25016300  | -0.24150300 | 2.76664300  |
| C | 0.90510000  | -2.29304200 | 1.64361600  |
| H | 0.04546100  | -2.93819100 | 1.47406500  |
| H | 1.49520000  | -2.24692400 | 0.71987500  |
| H | 1.53793400  | -2.70489000 | 2.43112300  |
| H | -0.69303500 | 0.81347500  | 1.86981400  |
| C | -0.62824700 | 0.03688000  | -0.10097300 |
| C | -0.54154200 | -1.08417200 | -1.09046300 |
| C | -1.20961900 | -2.30723500 | -0.90924600 |
| C | 0.19301600  | -0.89932500 | -2.27524400 |
| C | -1.14776200 | -3.30627400 | -1.88182600 |
| H | -1.78590600 | -2.48785100 | -0.00904200 |
| C | 0.25035100  | -1.89628800 | -3.24680700 |
| H | 0.72226700  | 0.03611700  | -2.42610100 |
| C | -0.42078900 | -3.10618500 | -3.05523800 |

|   |             |             |             |
|---|-------------|-------------|-------------|
| H | -1.67243800 | -4.24313200 | -1.71831900 |
| H | 0.82565400  | -1.72821500 | -4.15250400 |
| H | -0.37420800 | -3.88497400 | -3.81044000 |
| C | -0.64039300 | 1.28707900  | -0.52634700 |
| C | -0.68807700 | 2.52677600  | -0.95864900 |
| H | -1.67359900 | 2.93863500  | -1.18602800 |
| C | 0.44661000  | 3.44424200  | -1.17156800 |
| C | 1.75136600  | 3.13345800  | -0.75140200 |
| C | 0.20741300  | 4.67965200  | -1.79458100 |
| C | 2.78408800  | 4.04564300  | -0.94861300 |
| H | 1.96203800  | 2.18716400  | -0.26035900 |
| C | 1.24700900  | 5.58444100  | -2.00121100 |
| H | -0.80074500 | 4.92859600  | -2.11690600 |
| C | 2.53831400  | 5.27054200  | -1.57569300 |
| H | 3.77769900  | 3.80626300  | -0.58526100 |
| H | 1.04650200  | 6.53537400  | -2.48652900 |
| H | 3.34794800  | 5.97943000  | -1.72271400 |
| C | 5.93517100  | -3.52289400 | -0.51313600 |
| C | 5.97045300  | -2.27655800 | 0.11560900  |
| C | 4.95829800  | -1.33381900 | -0.09754700 |
| C | 3.90021400  | -1.67126800 | -0.95292400 |
| C | 3.85792700  | -2.91773300 | -1.57833200 |
| C | 4.87698800  | -3.84852200 | -1.36203600 |
| H | 6.72983200  | -4.24157000 | -0.33201400 |
| H | 6.79307000  | -2.03354900 | 0.78462100  |
| H | 3.10943600  | -0.94538100 | -1.11195800 |
| H | 3.02571500  | -3.16090500 | -2.23346500 |
| H | 4.84397800  | -4.82005600 | -1.84713400 |
| C | 5.01894700  | 0.03260100  | 0.56227900  |
| H | 5.42956500  | 0.75523100  | -0.15711300 |
| H | 5.75203500  | -0.01613900 | 1.38750400  |
| N | 3.69747700  | 0.51837000  | 0.95948400  |
| H | 3.32243000  | -0.06022200 | 1.70803300  |
| H | 3.76278300  | 1.46853900  | 1.33309900  |
| O | 0.94157800  | 2.49445100  | 3.00518900  |
| H | 0.63607300  | 2.70170500  | 3.89695400  |
| H | 1.07400000  | 1.52173800  | 2.99964600  |
| O | 3.54294400  | 3.28602600  | 2.28668500  |
| H | 3.98945400  | 3.12318300  | 3.12688700  |

|   |            |            |            |
|---|------------|------------|------------|
| H | 2.59373400 | 3.15138200 | 2.49465600 |
|---|------------|------------|------------|

**TS1W'**

|   |             |             |             |
|---|-------------|-------------|-------------|
| C | 5.96871800  | -1.77670500 | -1.26045600 |
| C | 5.06760400  | -1.02396300 | -0.50698300 |
| C | 5.25537300  | 0.35765800  | -0.35249200 |
| C | 6.35665100  | 0.96309100  | -0.96821200 |
| C | 7.26171300  | 0.20810500  | -1.71601400 |
| C | 7.06961800  | -1.16555600 | -1.86511400 |
| H | 5.81168900  | -2.84605600 | -1.37213900 |
| H | 4.20796800  | -1.50407200 | -0.04820400 |
| H | 6.50695600  | 2.03477000  | -0.86154400 |
| H | 8.11107100  | 0.69506700  | -2.18683100 |
| H | 7.76991400  | -1.75511600 | -2.44987300 |
| C | 4.31623500  | 1.18237600  | 0.50632000  |
| H | 4.45061800  | 2.24958500  | 0.28758000  |
| H | 4.53463700  | 1.04520600  | 1.57087700  |
| N | 2.91982500  | 0.81828500  | 0.30456100  |
| H | 2.64152000  | 0.58536300  | -0.66749000 |
| C | 2.04576300  | 0.55378100  | 1.28096000  |
| S | 2.39190300  | 0.70795500  | 2.91924000  |
| C | 0.66638900  | 0.11097900  | 0.72452100  |
| C | 0.63307600  | -1.46257600 | 0.58324400  |
| O | 1.65121000  | -1.91209900 | -0.18346900 |
| C | 0.55398800  | -2.29077400 | 1.85974900  |
| H | 1.41304000  | -2.03401200 | 2.48194200  |
| H | -0.34836000 | -2.11753700 | 2.44497200  |
| H | 0.63122900  | -3.34911600 | 1.59139800  |
| H | 0.67038300  | 0.44409000  | -0.31449900 |
| C | -0.52197500 | 0.90371400  | 1.33255100  |
| C | -1.40819300 | 0.53109000  | 2.48987900  |
| C | -0.92872700 | -0.00098000 | 3.69763200  |
| C | -2.78951100 | 0.78588000  | 2.38418600  |
| C | -1.80350000 | -0.28333200 | 4.74843200  |
| H | 0.13783800  | -0.14873200 | 3.81883600  |
| C | -3.65974300 | 0.50724900  | 3.43576700  |
| H | -3.17983700 | 1.21286200  | 1.46469000  |
| C | -3.17062800 | -0.03645200 | 4.62483200  |
| H | -1.40507800 | -0.68692300 | 5.67515500  |

|   |             |             |             |
|---|-------------|-------------|-------------|
| H | -4.72043800 | 0.71321300  | 3.32321100  |
| H | -3.84622700 | -0.25810900 | 5.44593300  |
| C | -0.78288000 | 2.04848000  | 0.72922500  |
| C | -1.01338500 | 3.22707800  | 0.19670400  |
| H | -0.50520400 | 4.08495500  | 0.64214500  |
| C | -1.92391000 | 3.52457900  | -0.92967400 |
| C | -2.21618200 | 2.57513400  | -1.92417200 |
| C | -2.50469800 | 4.79982200  | -1.02241900 |
| C | -3.09047300 | 2.89262600  | -2.96205900 |
| H | -1.72244900 | 1.60734500  | -1.91108900 |
| C | -3.38052400 | 5.11166500  | -2.06090500 |
| H | -2.27220800 | 5.54601600  | -0.26700600 |
| C | -3.68159000 | 4.15649000  | -3.03302100 |
| H | -3.29786000 | 2.15370800  | -3.73146800 |
| H | -3.82521500 | 6.10145500  | -2.11206800 |
| H | -4.35890500 | 4.39944600  | -3.84658600 |
| C | -4.29559500 | -2.77995700 | -2.79450400 |
| C | -3.48927800 | -2.02485500 | -1.94348800 |
| C | -2.99303600 | -2.58232300 | -0.75658900 |
| C | -3.32139300 | -3.90622000 | -0.43777300 |
| C | -4.12763500 | -4.66235400 | -1.28945700 |
| C | -4.61518200 | -4.10013200 | -2.46987600 |
| H | -4.68017100 | -2.33622200 | -3.70806000 |
| H | -3.24124300 | -0.99747100 | -2.19593100 |
| H | -2.95353800 | -4.34396700 | 0.48728100  |
| H | -4.37956000 | -5.68562200 | -1.02772200 |
| H | -5.24640400 | -4.68578600 | -3.13143800 |
| C | -2.09400800 | -1.77700000 | 0.15299400  |
| H | -2.14286100 | -2.14030100 | 1.17970800  |
| H | -2.36772900 | -0.72389500 | 0.15255900  |
| N | -0.66778400 | -1.85784600 | -0.31259700 |
| H | -0.44080600 | -2.82941800 | -0.53641400 |
| H | -0.58769800 | -1.33281300 | -1.23034200 |
| O | 2.00946700  | -0.37575000 | -2.02810100 |
| H | 2.72658100  | -0.63132900 | -2.62119200 |
| H | 1.86112400  | -1.24303000 | -1.09013100 |
| O | -0.44133400 | -0.39844600 | -2.61823300 |
| H | -0.62549900 | -0.86853800 | -3.44060600 |
| H | 0.58473800  | -0.31470300 | -2.55153800 |



**Int1W' (Int1W'')**

|   |             |             |             |
|---|-------------|-------------|-------------|
| C | 5.96178000  | -1.72373500 | -1.16476100 |
| C | 5.08069300  | -0.96029900 | -0.39914000 |
| C | 5.16650600  | 0.44039200  | -0.40549300 |
| C | 6.14808100  | 1.05402100  | -1.19114800 |
| C | 7.03432700  | 0.28934700  | -1.95250800 |
| C | 6.94269800  | -1.10237700 | -1.94234700 |
| H | 5.88668200  | -2.80753900 | -1.14863600 |
| H | 4.31480100  | -1.44655400 | 0.19866600  |
| H | 6.21973700  | 2.13881400  | -1.20747400 |
| H | 7.79081800  | 0.78221900  | -2.55649700 |
| H | 7.62946200  | -1.69948300 | -2.53534100 |
| C | 4.23753100  | 1.27505300  | 0.45336500  |
| H | 4.32870400  | 2.33578200  | 0.18710200  |
| H | 4.49156000  | 1.18852500  | 1.51493000  |
| N | 2.84821700  | 0.85240300  | 0.31688100  |
| H | 2.55960400  | 0.58626600  | -0.62470700 |
| C | 1.99650700  | 0.62194000  | 1.32919600  |
| S | 2.38187700  | 0.91345600  | 2.93539200  |
| C | 0.63250600  | 0.08902800  | 0.83085200  |
| C | 0.55749600  | -1.49041300 | 0.91458200  |
| O | 1.73035200  | -2.01156800 | 0.31821600  |
| C | 0.51814200  | -2.10635900 | 2.30998500  |
| H | 1.37283400  | -1.75554000 | 2.88956800  |
| H | -0.39131300 | -1.85391600 | 2.85316200  |
| H | 0.58810500  | -3.19414400 | 2.20762200  |
| H | 0.64144000  | 0.25504400  | -0.24868800 |
| C | -0.55582400 | 0.97706200  | 1.28970600  |
| C | -1.46142400 | 0.78436500  | 2.47409200  |
| C | -1.00062000 | 0.45669200  | 3.75908800  |
| C | -2.84081200 | 1.00887300  | 2.30236400  |
| C | -1.89311500 | 0.34644400  | 4.82665000  |
| H | 0.06299100  | 0.32614100  | 3.92015000  |
| C | -3.72875400 | 0.90038000  | 3.37049900  |
| H | -3.21346900 | 1.27262900  | 1.31689700  |
| C | -3.25850000 | 0.56353100  | 4.64064900  |
| H | -1.51109900 | 0.09929200  | 5.81326600  |
| H | -4.78832300 | 1.07602100  | 3.20746000  |

|   |             |             |             |
|---|-------------|-------------|-------------|
| H | -3.94782200 | 0.47498100  | 5.47538800  |
| C | -0.79196400 | 2.02913500  | 0.52954200  |
| C | -1.00486100 | 3.12709900  | -0.16083700 |
| H | -0.48760100 | 4.03166600  | 0.16620300  |
| C | -1.90990000 | 3.28490200  | -1.31844000 |
| C | -2.27249100 | 2.20252900  | -2.13911700 |
| C | -2.41859600 | 4.55863000  | -1.61986200 |
| C | -3.14315000 | 2.39383500  | -3.21008600 |
| H | -1.83296900 | 1.22410700  | -1.96754900 |
| C | -3.29113900 | 4.74491000  | -2.69087300 |
| H | -2.13304400 | 5.40503400  | -1.00047100 |
| C | -3.66198200 | 3.66109500  | -3.48801800 |
| H | -3.40617300 | 1.55044700  | -3.84303300 |
| H | -3.67936600 | 5.73693700  | -2.90351900 |
| H | -4.33772300 | 3.80455200  | -4.32613100 |
| C | -4.29828400 | -2.56464300 | -2.41413100 |
| C | -3.50306800 | -1.95726500 | -1.44121300 |
| C | -2.83704300 | -2.72892200 | -0.47828100 |
| C | -2.98992900 | -4.12089800 | -0.51050000 |
| C | -3.78193700 | -4.73175100 | -1.48419800 |
| C | -4.43710900 | -3.95411600 | -2.43984300 |
| H | -4.81729900 | -1.95246000 | -3.14625900 |
| H | -3.40617800 | -0.87515000 | -1.41954000 |
| H | -2.49156500 | -4.73076300 | 0.23978300  |
| H | -3.89300200 | -5.81218000 | -1.49133800 |
| H | -5.05922600 | -4.42642200 | -3.19438600 |
| C | -1.94083400 | -2.07937700 | 0.55557600  |
| H | -1.98177300 | -2.65699000 | 1.48802800  |
| H | -2.29750600 | -1.07543000 | 0.78308400  |
| N | -0.55668500 | -1.98462100 | 0.02686000  |
| H | -0.25438200 | -2.93180900 | -0.20392500 |
| H | -0.60483900 | -1.24414900 | -1.57291600 |
| O | 2.07762300  | -0.62204200 | -2.10684700 |
| H | 2.72324500  | -0.93071500 | -2.75282600 |
| H | 1.85824000  | -1.60862300 | -0.56815700 |
| O | -0.52637500 | -0.82181300 | -2.48096200 |
| H | -1.03751800 | -1.38708400 | -3.07322500 |
| H | 1.17081000  | -0.68054300 | -2.50450700 |

**TS1W''**

|   |             |             |             |
|---|-------------|-------------|-------------|
| C | 6.14633200  | 2.41123900  | -0.20024200 |
| C | 5.21241200  | 1.42996700  | -0.53268200 |
| C | 5.53155900  | 0.06982400  | -0.40121700 |
| C | 6.80256900  | -0.28267300 | 0.06610300  |
| C | 7.74051900  | 0.69868500  | 0.38968000  |
| C | 7.41410000  | 2.04872600  | 0.25876500  |
| H | 5.88443500  | 3.46011200  | -0.30476600 |
| H | 4.22761300  | 1.72272400  | -0.88868600 |
| H | 7.05912900  | -1.33305500 | 0.17663900  |
| H | 8.72280200  | 0.40751900  | 0.75011200  |
| H | 8.14147300  | 2.81358200  | 0.51414100  |
| C | 4.53664800  | -1.00272600 | -0.78816200 |
| H | 4.88910100  | -1.99227500 | -0.47419100 |
| H | 4.41124700  | -1.06084800 | -1.87728600 |
| N | 3.22475000  | -0.74069400 | -0.20318600 |
| H | 3.16820400  | 0.03289600  | 0.44688800  |
| C | 2.07095000  | -1.30556900 | -0.61044800 |
| S | 1.99564100  | -2.47324200 | -1.79507500 |
| C | 0.85706800  | -0.68743300 | 0.08850300  |
| C | 0.43862600  | 0.67466800  | -0.60436500 |
| O | 1.26291400  | 1.72628100  | -0.15031200 |
| C | 0.53531000  | 0.65445900  | -2.12274400 |
| H | 1.56827100  | 0.46857700  | -2.41419800 |
| H | -0.08385300 | -0.13609300 | -2.55039400 |
| H | 0.24668500  | 1.62460200  | -2.53233500 |
| H | 1.18688000  | -0.38360600 | 1.09499300  |
| C | -0.39248700 | -1.52756500 | 0.24288300  |
| C | -0.35224400 | -2.97088600 | 0.58428400  |
| C | 0.67270600  | -3.48518500 | 1.39595600  |
| C | -1.35961800 | -3.84987000 | 0.15043900  |
| C | 0.69018200  | -4.83013700 | 1.76353500  |
| H | 1.46608500  | -2.83102600 | 1.74609800  |
| C | -1.33738200 | -5.19297600 | 0.51334100  |
| H | -2.15618600 | -3.47176700 | -0.48086300 |
| C | -0.31386300 | -5.69165100 | 1.32355800  |
| H | 1.49296100  | -5.20354000 | 2.39320000  |
| H | -2.12113600 | -5.85554500 | 0.15724400  |
| H | -0.29839000 | -6.74064400 | 1.60439100  |

|                |             |             |             |
|----------------|-------------|-------------|-------------|
| C              | -1.55540300 | -0.85220100 | 0.27070200  |
| C              | -2.84226100 | -0.93774100 | 0.77539500  |
| H              | -2.90265100 | -1.40238100 | 1.76186900  |
| C              | -4.08441100 | -0.94105100 | -0.00070000 |
| C              | -4.10751600 | -0.97637900 | -1.41443800 |
| C              | -5.33541200 | -0.93745700 | 0.65684800  |
| C              | -5.30728500 | -0.97768400 | -2.12255600 |
| H              | -3.16568000 | -1.02516700 | -1.95586800 |
| C              | -6.53200200 | -0.95287800 | -0.05345500 |
| H              | -5.35564500 | -0.92319500 | 1.74441500  |
| C              | -6.53206900 | -0.96359000 | -1.45135400 |
| H              | -5.28420100 | -1.00723600 | -3.20916000 |
| H              | -7.47432900 | -0.95291200 | 0.48884500  |
| H              | -7.46627700 | -0.97088100 | -2.00446900 |
| C              | -3.50069100 | 4.88398200  | 0.52205400  |
| C              | -3.33351100 | 3.57148900  | 0.07381200  |
| C              | -2.08316000 | 3.11816500  | -0.37531300 |
| C              | -0.99989200 | 4.00922400  | -0.36604000 |
| C              | -1.16847800 | 5.31898800  | 0.08358300  |
| C              | -2.41619700 | 5.76118100  | 0.52813700  |
| H              | -4.47652400 | 5.21754800  | 0.86265600  |
| H              | -4.18443100 | 2.89415000  | 0.05802500  |
| H              | -0.01994200 | 3.66775200  | -0.68342900 |
| H              | -0.31968400 | 5.99664400  | 0.08858400  |
| H              | -2.54115000 | 6.78171600  | 0.87756200  |
| C              | -1.96601700 | 1.68848700  | -0.87282400 |
| H              | -1.73804700 | 1.65165600  | -1.93815600 |
| H              | -2.92887700 | 1.19516300  | -0.73423900 |
| N              | -0.97626500 | 0.84305800  | -0.14602800 |
| H              | -0.96010400 | 1.18007500  | 0.81835700  |
| H              | -2.52871000 | 0.66841400  | 2.09088700  |
| O              | 0.60579600  | 1.77661500  | 2.57408100  |
| H              | 1.01358100  | 1.20726700  | 3.23754500  |
| H              | 1.14762600  | 1.81307800  | 0.82325000  |
| O              | -2.12796400 | 1.44443200  | 2.56025000  |
| H              | -2.62641100 | 2.21491300  | 2.25186600  |
| H              | -0.36399400 | 1.70788900  | 2.72778600  |
| <b>Int2W''</b> |             |             |             |
| C              | -6.14452600 | -2.68558500 | -0.09559600 |

S100

|   |             |             |             |
|---|-------------|-------------|-------------|
| C | -5.26598000 | -1.67374200 | -0.48252900 |
| C | -5.62651300 | -0.32494400 | -0.34222000 |
| C | -6.88309700 | -0.01450800 | 0.18943600  |
| C | -7.76645400 | -1.02650900 | 0.56778100  |
| C | -7.39851200 | -2.36493400 | 0.42803800  |
| H | -5.85068600 | -3.72513500 | -0.20766100 |
| H | -4.29193600 | -1.93295600 | -0.89053000 |
| H | -7.17105600 | 1.02680900  | 0.30783100  |
| H | -8.73824100 | -0.76807000 | 0.97808100  |
| H | -8.08302000 | -3.15334200 | 0.72652200  |
| C | -4.68930100 | 0.77880500  | -0.78195000 |
| H | -5.06152400 | 1.75849100  | -0.45934000 |
| H | -4.61324700 | 0.83155000  | -1.87555900 |
| N | -3.34515600 | 0.56372100  | -0.25440700 |
| H | -3.24737600 | -0.16345400 | 0.44238000  |
| C | -2.22892100 | 1.17849800  | -0.69396400 |
| S | -2.23762800 | 2.35111200  | -1.87414400 |
| C | -0.97102600 | 0.61862400  | -0.02187600 |
| C | -0.46333600 | -0.68529500 | -0.73434800 |
| O | -1.07701900 | -1.84345600 | -0.26919800 |
| C | -0.60174200 | -0.66581500 | -2.24887600 |
| H | -1.65285800 | -0.53241000 | -2.50228800 |
| H | -0.04061800 | 0.15768500  | -2.69304200 |
| H | -0.28606000 | -1.62029500 | -2.67356600 |
| H | -1.27322400 | 0.28818100  | 0.98751100  |
| C | 0.24972400  | 1.49639100  | 0.10277400  |
| C | 0.18339500  | 2.89899900  | 0.54551700  |
| C | -0.86593500 | 3.35059300  | 1.36689500  |
| C | 1.17038000  | 3.83189300  | 0.17117600  |
| C | -0.92428900 | 4.67362000  | 1.80246800  |
| H | -1.64794800 | 2.66095900  | 1.67163300  |
| C | 1.10969500  | 5.15215400  | 0.60467900  |
| H | 1.98077900  | 3.51276200  | -0.47511600 |
| C | 0.06340400  | 5.58261100  | 1.42564100  |
| H | -1.74629700 | 4.99332200  | 2.43707600  |
| H | 1.87980500  | 5.85237500  | 0.29325700  |
| H | 0.01705800  | 6.61464900  | 1.76056700  |
| C | 1.40836900  | 0.77464500  | 0.04903000  |
| C | 2.67946800  | 0.97817800  | 0.68393000  |

|   |             |             |             |
|---|-------------|-------------|-------------|
| H | 2.62025700  | 1.79110800  | 1.41102100  |
| C | 3.99140200  | 0.94581400  | 0.00794200  |
| C | 4.15586300  | 1.07702300  | -1.39056600 |
| C | 5.17574500  | 0.82917700  | 0.77223700  |
| C | 5.41688300  | 1.04662100  | -1.98879200 |
| H | 3.27678500  | 1.24127000  | -2.01008200 |
| C | 6.43429000  | 0.82228400  | 0.17802700  |
| H | 5.08917700  | 0.74165900  | 1.85288600  |
| C | 6.56791300  | 0.91683700  | -1.21161500 |
| H | 5.49840700  | 1.15017600  | -3.06809400 |
| H | 7.31997300  | 0.73308300  | 0.80236100  |
| H | 7.54981100  | 0.90129400  | -1.67482200 |
| C | 4.09763900  | -4.14110000 | 0.67367600  |
| C | 3.71064400  | -2.94659500 | 0.06197900  |
| C | 2.41543200  | -2.80181500 | -0.45738900 |
| C | 1.51580900  | -3.87277600 | -0.35556900 |
| C | 1.90463700  | -5.06362400 | 0.25788800  |
| C | 3.19509600  | -5.20129700 | 0.77301900  |
| H | 5.10444300  | -4.24220200 | 1.06805800  |
| H | 4.41477000  | -2.12222600 | -0.01374300 |
| H | 0.50419100  | -3.76155000 | -0.73376500 |
| H | 1.19822100  | -5.88493300 | 0.33360300  |
| H | 3.49579300  | -6.13032600 | 1.24826800  |
| C | 2.02614500  | -1.50218000 | -1.12748100 |
| H | 1.57782700  | -1.68094600 | -2.10174800 |
| H | 2.90400700  | -0.88101900 | -1.27352500 |
| N | 1.03625500  | -0.68073800 | -0.30399400 |
| H | 1.06801800  | -1.12424100 | 0.62948600  |
| H | 2.35188100  | -0.34819600 | 1.91256500  |
| O | -0.68592100 | -1.79388500 | 2.43807200  |
| H | -1.17866200 | -1.26844400 | 3.07946100  |
| H | -1.04979300 | -1.85964800 | 0.72013400  |
| O | 1.93280300  | -1.14953900 | 2.40742600  |
| H | 2.56505600  | -1.87514500 | 2.31207400  |
| H | 0.26794100  | -1.57675300 | 2.58665100  |

**TS2W''**

|   |             |             |             |
|---|-------------|-------------|-------------|
| C | -7.27941900 | -2.26406300 | -0.10005000 |
| C | -6.29774800 | -1.64545300 | -0.87676800 |

|   |             |             |             |
|---|-------------|-------------|-------------|
| C | -5.66068100 | -0.48315500 | -0.42876600 |
| C | -6.02261200 | 0.04943900  | 0.81725000  |
| C | -6.99872200 | -0.56889500 | 1.59669500  |
| C | -7.63032300 | -1.72792500 | 1.13873800  |
| H | -7.76749700 | -3.16382600 | -0.46294700 |
| H | -6.02527000 | -2.06647600 | -1.84109000 |
| H | -5.53753000 | 0.95519700  | 1.17193100  |
| H | -7.27153300 | -0.14388700 | 2.55820800  |
| H | -8.39373200 | -2.20759700 | 1.74414200  |
| C | -4.59723100 | 0.18975400  | -1.26684900 |
| H | -4.80367300 | 1.25690700  | -1.40207400 |
| H | -4.55864900 | -0.24436100 | -2.27396400 |
| N | -3.28675200 | 0.07714700  | -0.62714500 |
| H | -3.17768100 | -0.66073200 | 0.05838100  |
| C | -2.18753200 | 0.76567100  | -0.99565900 |
| S | -2.17489200 | 1.88083900  | -2.23159500 |
| C | -0.96124000 | 0.36418300  | -0.17105000 |
| C | -0.27635600 | -0.93884200 | -0.72076900 |
| O | -0.78834800 | -2.10032700 | -0.15737900 |
| C | -0.35491600 | -1.08814400 | -2.23294500 |
| H | -1.40572600 | -1.14546900 | -2.51654400 |
| H | 0.08802700  | -0.23361600 | -2.74721000 |
| H | 0.12007900  | -2.01678000 | -2.55413900 |
| H | -1.33150900 | 0.09360700  | 0.83138800  |
| C | 0.15831000  | 1.36162900  | 0.00288700  |
| C | -0.07624500 | 2.76692400  | 0.38079600  |
| C | -1.21092600 | 3.13637200  | 1.12454800  |
| C | 0.83414500  | 3.77802300  | 0.02063600  |
| C | -1.42322100 | 4.46116100  | 1.50229500  |
| H | -1.93401900 | 2.38129900  | 1.41837500  |
| C | 0.61965100  | 5.10060700  | 0.39649400  |
| H | 1.70677900  | 3.51868600  | -0.56933000 |
| C | -0.50945900 | 5.45085900  | 1.14131500  |
| H | -2.30641000 | 4.71905900  | 2.08015100  |
| H | 1.33374000  | 5.86344100  | 0.09930900  |
| H | -0.67674200 | 6.48410900  | 1.43099900  |
| C | 1.37358000  | 0.75742200  | 0.06942200  |
| C | 2.56096800  | 1.09642500  | 0.83925300  |
| H | 2.33548700  | 1.94317400  | 1.49396400  |

|   |             |             |             |
|---|-------------|-------------|-------------|
| C | 3.91311200  | 1.25577200  | 0.23831500  |
| C | 4.13922600  | 1.44328400  | -1.14211400 |
| C | 5.05061100  | 1.26704300  | 1.07452900  |
| C | 5.42696800  | 1.59811000  | -1.66004000 |
| H | 3.28497600  | 1.49089700  | -1.81400900 |
| C | 6.33336900  | 1.44175500  | 0.56224100  |
| H | 4.90984700  | 1.13647800  | 2.14501100  |
| C | 6.53469100  | 1.59837200  | -0.81305000 |
| H | 5.55991100  | 1.73899500  | -2.72986100 |
| H | 7.18443700  | 1.44792500  | 1.23872400  |
| H | 7.53613200  | 1.72583000  | -1.21318000 |
| C | 4.40141400  | -4.12113000 | 0.62663300  |
| C | 3.97698800  | -2.88811900 | 0.12845500  |
| C | 2.71563400  | -2.75352700 | -0.47068700 |
| C | 1.88334300  | -3.87890700 | -0.55687200 |
| C | 2.30812300  | -5.10974900 | -0.05633500 |
| C | 3.56725300  | -5.23561200 | 0.53391900  |
| H | 5.38308500  | -4.20914900 | 1.08271500  |
| H | 4.62929800  | -2.02155000 | 0.19975100  |
| H | 0.89108000  | -3.78730200 | -0.98523300 |
| H | 1.65329500  | -5.97322200 | -0.12925300 |
| H | 3.89549200  | -6.19665400 | 0.91884700  |
| C | 2.31796300  | -1.40039300 | -1.02304200 |
| H | 2.01753000  | -1.45642400 | -2.06737300 |
| H | 3.16870600  | -0.72815700 | -0.96558100 |
| N | 1.19604000  | -0.72978600 | -0.24344000 |
| H | 1.28051700  | -1.14365000 | 0.71432800  |
| H | 2.36202100  | -0.09715200 | 1.87062400  |
| O | -0.63376000 | -1.65224300 | 2.50504500  |
| H | 0.31952300  | -1.39770100 | 2.64353400  |
| H | -0.79379700 | -2.01422400 | 0.83330200  |
| O | 1.93993700  | -0.99719600 | 2.38948800  |
| H | 2.64347400  | -1.65591500 | 2.46246100  |
| H | -0.80135300 | -2.39192500 | 3.10147500  |

**Int3W''**

|   |            |            |             |
|---|------------|------------|-------------|
| C | 7.24604200 | 1.73497500 | -0.72015500 |
| C | 6.22255300 | 0.99802600 | -1.31944100 |
| C | 5.50945700 | 0.04062200 | -0.58939700 |



|   |             |             |             |
|---|-------------|-------------|-------------|
| C | 5.83925400  | -0.16343100 | 0.75827900  |
| C | 6.85704100  | 0.57408100  | 1.36080900  |
| C | 7.56434000  | 1.52557100  | 0.62166600  |
| H | 7.79321600  | 2.47105900  | -1.30204900 |
| H | 5.97601100  | 1.16434500  | -2.36487900 |
| H | 5.29531200  | -0.90809400 | 1.33370300  |
| H | 7.10350700  | 0.40232600  | 2.40463800  |
| H | 8.36118000  | 2.09676600  | 1.08907100  |
| C | 4.40269800  | -0.76147300 | -1.23591600 |
| H | 4.53401400  | -1.83645900 | -1.06671100 |
| H | 4.40394400  | -0.62366800 | -2.32434100 |
| N | 3.09959100  | -0.38140200 | -0.69548500 |
| H | 3.05143300  | 0.48252700  | -0.15964000 |
| C | 1.95571800  | -1.05081800 | -0.93726600 |
| S | 1.88101400  | -2.44853300 | -1.84720900 |
| C | 0.75522200  | -0.36468500 | -0.30050200 |
| C | 0.02654200  | 0.67114800  | -1.22677700 |
| O | 0.70299100  | 1.88409300  | -1.39212100 |
| C | -0.25984200 | 0.14663300  | -2.63577100 |
| H | 0.68089400  | -0.02816400 | -3.15792300 |
| H | -0.81331900 | -0.79280200 | -2.60621200 |
| H | -0.82436300 | 0.88884200  | -3.20501800 |
| H | 1.14828200  | 0.22650400  | 0.53958200  |
| C | -0.39980700 | -1.18356900 | 0.25756100  |
| C | -0.22489500 | -2.42544800 | 1.02758000  |
| C | 0.93482700  | -2.62114800 | 1.80290900  |
| C | -1.19522500 | -3.44469700 | 1.03590300  |
| C | 1.10339000  | -3.77007000 | 2.57049200  |
| H | 1.70936700  | -1.86045700 | 1.81056400  |
| C | -1.02706800 | -4.59293000 | 1.80899500  |
| H | -2.07337700 | -3.35320700 | 0.40586800  |
| C | 0.12086800  | -4.76217400 | 2.58279600  |
| H | 2.00641400  | -3.89119900 | 3.16239400  |
| H | -1.79136900 | -5.36490000 | 1.79157300  |
| H | 0.25456600  | -5.66000100 | 3.17896600  |
| C | -1.51246500 | -0.40732900 | 0.18996500  |
| C | -2.84304000 | -0.64558100 | 0.84948800  |
| H | -2.69274900 | -1.40020500 | 1.62973900  |
| C | -3.99432600 | -1.09729000 | -0.04414300 |

|   |             |             |             |
|---|-------------|-------------|-------------|
| C | -3.78373300 | -1.81082700 | -1.23113900 |
| C | -5.31477000 | -0.83594300 | 0.35105200  |
| C | -4.86332900 | -2.24979400 | -2.00134700 |
| H | -2.76876700 | -2.02211400 | -1.55416000 |
| C | -6.39404100 | -1.27498800 | -0.41531100 |
| H | -5.49646600 | -0.28968300 | 1.27394400  |
| C | -6.17142500 | -1.98407700 | -1.59743700 |
| H | -4.67753600 | -2.80028400 | -2.91912500 |
| H | -7.40846900 | -1.06222900 | -0.08992100 |
| H | -7.01005300 | -2.32460300 | -2.19742800 |
| C | -4.37225800 | 4.02398300  | 1.19356100  |
| C | -3.99814000 | 2.92459300  | 0.41531000  |
| C | -2.72702600 | 2.85809400  | -0.16420400 |
| C | -1.83979500 | 3.92874200  | 0.03109200  |
| C | -2.21067300 | 5.02670500  | 0.80784700  |
| C | -3.47869800 | 5.07459500  | 1.39648100  |
| H | -5.36285200 | 4.05845800  | 1.63783000  |
| H | -4.70255800 | 2.11332500  | 0.25050200  |
| H | -0.86133000 | 3.88913600  | -0.44043100 |
| H | -1.51853800 | 5.85381700  | 0.94168500  |
| H | -3.76862600 | 5.93054000  | 1.99871500  |
| C | -2.31128700 | 1.67589800  | -1.02476500 |
| H | -1.92100100 | 2.07101400  | -1.96521400 |
| H | -3.18507300 | 1.06642400  | -1.27083100 |
| N | -1.24123600 | 0.84805800  | -0.42596600 |
| H | -0.58537300 | 1.73574000  | 1.24975300  |
| H | -3.14253100 | 0.27308100  | 1.36876100  |
| O | 2.27568400  | 2.27229500  | 0.88421900  |
| H | 1.48658300  | 2.31862500  | 1.48253300  |
| H | 1.22757000  | 2.09821500  | -0.59182300 |
| O | -0.14854600 | 2.14273300  | 2.03207200  |
| H | -0.64577000 | 2.96128100  | 2.16453900  |
| H | 2.77545200  | 3.08863200  | 1.00419200  |

**TS3W''**

|   |             |             |             |
|---|-------------|-------------|-------------|
| C | -6.01672900 | -1.57279500 | -2.65551300 |
| C | -5.10537800 | -0.57438600 | -2.30979700 |
| C | -5.18256800 | 0.05460700  | -1.06020800 |
| C | -6.18651000 | -0.33545700 | -0.16419200 |

|   |             |             |             |
|---|-------------|-------------|-------------|
| C | -7.09783100 | -1.33467400 | -0.50934300 |
| C | -7.01475000 | -1.95537700 | -1.75692800 |
| H | -5.95059500 | -2.04936600 | -3.62956000 |
| H | -4.32638900 | -0.27606700 | -3.00542500 |
| H | -6.24988300 | 0.14657400  | 0.80841200  |
| H | -7.87502500 | -1.62357500 | 0.19259400  |
| H | -7.72618900 | -2.72977800 | -2.02899200 |
| C | -4.17673800 | 1.12232500  | -0.67097700 |
| H | -4.63120600 | 1.82656700  | 0.03352400  |
| H | -3.82773600 | 1.67299900  | -1.54574500 |
| N | -3.00532000 | 0.54816500  | -0.00413100 |
| H | -3.20473800 | 0.16813600  | 0.95113000  |
| C | -1.79953100 | 0.43052800  | -0.54670100 |
| S | -1.36602200 | 0.88880100  | -2.11232600 |
| C | -0.75520900 | -0.16848800 | 0.41980900  |
| C | 0.00319700  | -1.31394500 | -0.19800700 |
| O | 0.01516400  | -2.55118200 | 1.76518400  |
| C | -0.63670300 | -2.43734100 | -0.94026900 |
| H | -1.62171600 | -2.63389500 | -0.51721300 |
| H | -0.76642200 | -2.14318000 | -1.98828400 |
| H | -0.04578100 | -3.35233400 | -0.89004800 |
| H | -1.24041200 | -0.52207200 | 1.34015500  |
| C | 0.34590200  | 0.81512000  | 0.76135500  |
| C | 0.09272700  | 2.06349600  | 1.49901100  |
| C | -0.75495600 | 2.04462500  | 2.62239700  |
| C | 0.66823000  | 3.28424300  | 1.10551700  |
| C | -1.00437000 | 3.21474700  | 3.33629500  |
| H | -1.19304400 | 1.10381900  | 2.94390500  |
| C | 0.41619600  | 4.45077300  | 1.82634700  |
| H | 1.28864100  | 3.32424600  | 0.21604300  |
| C | -0.41966900 | 4.42046300  | 2.94334400  |
| H | -1.65734100 | 3.18308400  | 4.20360700  |
| H | 0.86379800  | 5.38678200  | 1.50508000  |
| H | -0.61906700 | 5.33131800  | 3.50031100  |
| C | 1.51637300  | 0.31755400  | 0.31469900  |
| C | 2.90250100  | 0.87319900  | 0.41362100  |
| H | 2.85953000  | 1.68925200  | 1.14372200  |
| C | 3.50635600  | 1.39861600  | -0.88670000 |
| C | 2.71107100  | 1.85047100  | -1.94876200 |

|   |             |             |             |
|---|-------------|-------------|-------------|
| C | 4.90131700  | 1.46462900  | -1.01275800 |
| C | 3.30260400  | 2.36506000  | -3.10556700 |
| H | 1.62768700  | 1.78588100  | -1.88299800 |
| C | 5.49008400  | 1.98311700  | -2.16544200 |
| H | 5.52867300  | 1.10751100  | -0.19971000 |
| C | 4.69087600  | 2.43678300  | -3.21721200 |
| H | 2.67108600  | 2.70761600  | -3.92016500 |
| H | 6.57265300  | 2.02875500  | -2.24399100 |
| H | 5.14792800  | 2.83744200  | -4.11725900 |
| C | 5.70343300  | -3.01532500 | 0.17088100  |
| C | 4.69868900  | -2.41031700 | -0.58423500 |
| C | 3.38658600  | -2.34225800 | -0.09742400 |
| C | 3.08710300  | -2.87575500 | 1.16326500  |
| C | 4.10174500  | -3.46915000 | 1.91785900  |
| C | 5.40614400  | -3.54615500 | 1.42689600  |
| H | 6.71644500  | -3.06280800 | -0.21809400 |
| H | 4.93679600  | -1.98425900 | -1.55575800 |
| H | 2.07004500  | -2.81479400 | 1.55375800  |
| H | 3.86668700  | -3.87533400 | 2.89769800  |
| H | 6.18748700  | -4.01178500 | 2.02066000  |
| C | 2.31919700  | -1.73577600 | -0.99521400 |
| H | 1.81347600  | -2.51801700 | -1.56512700 |
| H | 2.78330500  | -1.06580200 | -1.72375100 |
| N | 1.27170700  | -0.96369100 | -0.31086000 |
| H | -0.72486600 | -2.03602200 | 2.51874100  |
| H | 3.57294300  | 0.11846700  | 0.83792900  |
| O | -3.78985500 | -0.46324600 | 2.42617100  |
| H | -2.94219900 | -0.86232100 | 2.83700400  |
| H | -0.32762000 | -3.44575500 | 1.63815300  |
| O | -1.55894800 | -1.41255100 | 3.19280100  |
| H | -1.16128900 | -1.10323500 | 4.01458900  |
| H | -4.35125600 | -1.22330300 | 2.22775600  |

**Int4W''**

|   |             |             |             |
|---|-------------|-------------|-------------|
| C | -6.12664300 | 1.73641600  | 0.64560300  |
| C | -5.21974600 | 0.73894100  | 0.99948900  |
| C | -5.01866500 | -0.36923000 | 0.16306400  |
| C | -5.74453100 | -0.45489300 | -1.03180500 |
| C | -6.65321100 | 0.54641200  | -1.38844400 |

|   |             |             |             |
|---|-------------|-------------|-------------|
| C | -6.84491000 | 1.64444100  | -0.55008100 |
| H | -6.27600500 | 2.58682500  | 1.30472400  |
| H | -4.66160900 | 0.80855900  | 1.92901600  |
| H | -5.60240700 | -1.31454900 | -1.68266900 |
| H | -7.21144100 | 0.46366600  | -2.31669300 |
| H | -7.55188900 | 2.42239300  | -0.82326600 |
| C | -4.01516700 | -1.44103300 | 0.54467400  |
| H | -4.12768600 | -2.31204500 | -0.11114900 |
| H | -4.15953200 | -1.76300700 | 1.57857300  |
| N | -2.64074800 | -0.96086500 | 0.43493900  |
| H | -2.36390000 | -0.68337300 | -0.51177500 |
| C | -1.77614000 | -0.80545000 | 1.45277200  |
| S | -2.15780800 | -1.09979100 | 3.07006200  |
| C | -0.41535200 | -0.39570300 | 1.02477200  |
| C | 0.37721400  | 0.61268500  | 1.57675500  |
| O | -1.13340100 | 4.26106500  | 0.91719200  |
| C | 0.07995400  | 1.56530500  | 2.69352800  |
| H | -0.87946900 | 1.29714900  | 3.13511300  |
| H | 0.82857100  | 1.48909400  | 3.49082900  |
| H | 0.02722100  | 2.60858000  | 2.36376500  |
| H | -0.81173600 | 1.45310100  | -0.28109700 |
| C | 0.35125200  | -1.02799900 | -0.02572400 |
| C | -0.03710300 | -2.22106900 | -0.81557700 |
| C | -0.04305000 | -2.19467500 | -2.21942200 |
| C | -0.40103600 | -3.41486100 | -0.16849500 |
| C | -0.38094100 | -3.33131900 | -2.95501900 |
| H | 0.19039600  | -1.26811300 | -2.73445700 |
| C | -0.74685200 | -4.54704900 | -0.90392600 |
| H | -0.40858400 | -3.44881800 | 0.91694700  |
| C | -0.73209700 | -4.51168000 | -2.30024200 |
| H | -0.38203600 | -3.28811100 | -4.04036000 |
| H | -1.02217300 | -5.46085100 | -0.38503300 |
| H | -0.99835100 | -5.39585900 | -2.87218000 |
| C | 1.57816100  | -0.38875100 | -0.07457800 |
| C | 2.78895700  | -0.74927300 | -0.88638400 |
| H | 2.46491000  | -1.50117000 | -1.61412900 |
| C | 3.97039300  | -1.31672600 | -0.10272600 |
| C | 3.78512700  | -2.07991500 | 1.05730800  |
| C | 5.27676900  | -1.11987300 | -0.57151900 |

|   |             |             |             |
|---|-------------|-------------|-------------|
| C | 4.87782800  | -2.62741600 | 1.73112800  |
| H | 2.77940400  | -2.24536000 | 1.43225300  |
| C | 6.37086600  | -1.66825900 | 0.09923800  |
| H | 5.43652400  | -0.53878300 | -1.47708800 |
| C | 6.17434000  | -2.42335100 | 1.25613800  |
| H | 4.71404000  | -3.21573300 | 2.62950200  |
| H | 7.37509600  | -1.50337100 | -0.28097400 |
| H | 7.02348500  | -2.84846900 | 1.78301200  |
| C | 4.32474100  | 3.53098000  | -1.69210400 |
| C | 4.09694100  | 2.57745300  | -0.69685100 |
| C | 2.91013800  | 2.58342800  | 0.04553600  |
| C | 1.95896300  | 3.58378100  | -0.20931000 |
| C | 2.18618800  | 4.53243400  | -1.20849000 |
| C | 3.36542100  | 4.50735300  | -1.95673400 |
| H | 5.25179900  | 3.50895200  | -2.25761400 |
| H | 4.85000500  | 1.82138300  | -0.49131700 |
| H | 1.05039500  | 3.65881800  | 0.38306700  |
| H | 1.44368000  | 5.30503500  | -1.38863800 |
| H | 3.53890200  | 5.24956400  | -2.73027100 |
| C | 2.68985200  | 1.54338300  | 1.13453100  |
| H | 2.48475400  | 2.03880100  | 2.08494100  |
| H | 3.59922300  | 0.95203700  | 1.26768200  |
| N | 1.57540300  | 0.61814300  | 0.88649800  |
| H | -1.28989800 | 3.61404400  | 0.20516300  |
| H | 3.13614500  | 0.10723900  | -1.47589100 |
| O | -2.58577700 | 0.21031400  | -2.25211300 |
| H | -2.08486400 | 1.01338900  | -2.01440900 |
| H | -1.33072900 | 5.11961700  | 0.52384400  |
| O | -0.96798100 | 2.12946700  | -0.97001300 |
| H | -0.08334200 | 2.31066300  | -1.32171000 |
| H | -3.51526000 | 0.46069800  | -2.15192200 |

**TS2W'**

|   |            |            |             |
|---|------------|------------|-------------|
| C | 6.39237600 | 2.23107700 | -1.03529800 |
| C | 5.60064800 | 1.20094500 | -1.54640100 |
| C | 4.91234900 | 0.33436500 | -0.69012100 |
| C | 5.02845900 | 0.52377400 | 0.69524100  |
| C | 5.81208900 | 1.55684800 | 1.20780700  |
| C | 6.49832800 | 2.41289600 | 0.34350200  |

|   |             |             |             |
|---|-------------|-------------|-------------|
| H | 6.92107500  | 2.89327400  | -1.71489600 |
| H | 5.51672700  | 1.06652600  | -2.62182300 |
| H | 4.49857000  | -0.13973400 | 1.37361400  |
| H | 5.89003000  | 1.69124400  | 2.28278500  |
| H | 7.11074300  | 3.21585600  | 0.74312800  |
| C | 4.07466600  | -0.79700300 | -1.24889700 |
| H | 4.49936500  | -1.76865400 | -0.97131500 |
| H | 4.08043700  | -0.76717200 | -2.34587700 |
| N | 2.70897900  | -0.71947100 | -0.73915700 |
| H | 2.45739500  | 0.13190800  | -0.25554300 |
| C | 1.72951600  | -1.64919400 | -0.90863900 |
| S | 2.18965100  | -3.09384700 | -1.77016100 |
| C | 0.40638000  | -1.33224800 | -0.43373800 |
| C | -0.65859600 | -2.46506700 | -0.25173300 |
| O | -0.65071200 | -3.36141000 | -1.40392700 |
| C | -0.42583200 | -3.38404000 | 0.96012100  |
| H | 0.56650200  | -3.83922800 | 0.89965500  |
| H | -0.49369400 | -2.83960800 | 1.90251600  |
| H | -1.17394400 | -4.18369000 | 0.95589900  |
| H | -0.19473800 | -0.61377200 | -1.75904100 |
| C | 0.34661500  | -0.15249400 | 0.53371400  |
| C | 0.62039800  | -0.29000600 | 2.00823000  |
| C | 1.54398200  | -1.23266600 | 2.48952800  |
| C | -0.00131900 | 0.56478700  | 2.93389200  |
| C | 1.83866800  | -1.31190500 | 3.85077600  |
| H | 2.03630400  | -1.90293200 | 1.79367900  |
| C | 0.29035100  | 0.48152300  | 4.29417800  |
| H | -0.71892100 | 1.29810400  | 2.57789100  |
| C | 1.21301700  | -0.45717000 | 4.75963300  |
| H | 2.55901600  | -2.04613800 | 4.20031800  |
| H | -0.20868200 | 1.14813300  | 4.99175300  |
| H | 1.43869100  | -0.52480400 | 5.81974900  |
| C | 0.18312200  | 1.07254600  | 0.06030400  |
| C | 0.12746700  | 2.30665200  | -0.39590100 |
| H | 1.07335200  | 2.78494800  | -0.66302800 |
| C | -1.07207500 | 3.14741300  | -0.57212300 |
| C | -2.37320200 | 2.63206800  | -0.44935900 |
| C | -0.91566500 | 4.50923900  | -0.87676300 |
| C | -3.48106800 | 3.45794600  | -0.61287900 |

|   |             |             |             |
|---|-------------|-------------|-------------|
| H | -2.51321900 | 1.57678600  | -0.24201400 |
| C | -2.02618800 | 5.33624900  | -1.04024800 |
| H | 0.08561700  | 4.92047500  | -0.97949500 |
| C | -3.31353500 | 4.81445800  | -0.90702500 |
| H | -4.47706600 | 3.03543600  | -0.51768500 |
| H | -1.88482200 | 6.38809100  | -1.27211500 |
| H | -4.17948400 | 5.45709100  | -1.03609600 |
| C | -5.74463300 | 0.00237300  | -0.94737000 |
| C | -4.44256000 | -0.43928800 | -0.70275800 |
| C | -4.08073000 | -0.92047600 | 0.56299800  |
| C | -5.05138800 | -0.95379200 | 1.57226000  |
| C | -6.35065400 | -0.50746100 | 1.33067700  |
| C | -6.70245900 | -0.02762700 | 0.06772800  |
| H | -6.01087000 | 0.36662600  | -1.93585200 |
| H | -3.69471800 | -0.42145900 | -1.48877700 |
| H | -4.78677200 | -1.33573500 | 2.55557400  |
| H | -7.09004200 | -0.54263600 | 2.12587700  |
| H | -7.71565100 | 0.31335200  | -0.12480500 |
| C | -2.66029200 | -1.36860000 | 0.86121100  |
| H | -2.68357900 | -2.06305300 | 1.71680200  |
| H | -2.07371800 | -0.50490500 | 1.18758400  |
| N | -2.03128200 | -1.93294300 | -0.33498000 |
| H | -2.60212400 | -2.71954400 | -0.64062300 |
| H | -0.82980100 | -1.24738500 | -3.28880300 |
| O | -0.98366200 | -2.39076600 | -3.62332800 |
| H | -0.93253000 | -2.84470200 | -2.64086400 |
| H | 0.32258200  | -3.62097600 | -1.52902400 |
| O | -0.65281800 | -0.21826800 | -2.67206000 |
| H | -0.00973800 | 0.38180400  | -3.07450200 |
| H | -0.17246300 | -2.68825400 | -4.06388200 |

**Int2W'**

|   |            |            |             |
|---|------------|------------|-------------|
| C | 5.06893542 | 1.91316330 | -4.51040208 |
| C | 4.57191928 | 0.68555513 | -4.06860510 |
| C | 4.21976689 | 0.49611712 | -2.72769728 |
| C | 4.37058082 | 1.56725358 | -1.83410508 |
| C | 4.85911459 | 2.79658497 | -2.27469657 |
| C | 5.21176394 | 2.97266806 | -3.61462136 |
| H | 5.33893320 | 2.04174993 | -5.55464708 |



|   |             |             |             |
|---|-------------|-------------|-------------|
| H | 4.45717875  | -0.13563077 | -4.77155033 |
| H | 4.09973719  | 1.43669482  | -0.78968501 |
| H | 4.96811544  | 3.61643122  | -1.57064704 |
| H | 5.59475086  | 3.92955626  | -3.95694258 |
| C | 3.70452641  | -0.84496263 | -2.24814612 |
| H | 4.40704306  | -1.30071422 | -1.54083606 |
| H | 3.62711014  | -1.54457734 | -3.09006909 |
| N | 2.41151221  | -0.68777666 | -1.58909079 |
| H | 1.96048008  | 0.21101990  | -1.69281143 |
| C | 1.72951600  | -1.64919400 | -0.90863900 |
| S | 2.52384114  | -3.19552086 | -0.77120726 |
| C | 0.40638000  | -1.33224800 | -0.43373800 |
| C | -0.55965719 | -2.35982542 | -0.26864170 |
| O | -1.37249822 | -4.22720526 | -1.93269759 |
| C | -0.32689319 | -3.27879842 | 0.94321230  |
| H | 0.66544081  | -3.73398642 | 0.88274630  |
| H | -0.39475519 | -2.73436642 | 1.88560730  |
| H | -1.07500519 | -4.07844842 | 0.93899030  |
| H | -0.48044759 | -0.29761366 | -2.37280185 |
| C | 0.34661500  | -0.15249400 | 0.53371400  |
| C | 0.62039800  | -0.29000600 | 2.00823000  |
| C | 1.54398200  | -1.23266600 | 2.48952800  |
| C | -0.00131900 | 0.56478700  | 2.93389200  |
| C | 1.83866800  | -1.31190500 | 3.85077600  |
| H | 2.03630400  | -1.90293200 | 1.79367900  |
| C | 0.29035100  | 0.48152300  | 4.29417800  |
| H | -0.71892100 | 1.29810400  | 2.57789100  |
| C | 1.21301700  | -0.45717000 | 4.75963300  |
| H | 2.55901600  | -2.04613800 | 4.20031800  |
| H | -0.20868200 | 1.14813300  | 4.99175300  |
| H | 1.43869100  | -0.52480400 | 5.81974900  |
| C | 0.18312200  | 1.07254600  | 0.06030400  |
| C | 0.12746700  | 2.30665200  | -0.39590100 |
| H | 1.07335200  | 2.78494800  | -0.66302800 |
| C | -1.07207500 | 3.14741300  | -0.57212300 |
| C | -2.37320200 | 2.63206800  | -0.44935900 |
| C | -0.91566500 | 4.50923900  | -0.87676300 |
| C | -3.48106800 | 3.45794600  | -0.61287900 |
| H | -2.51321900 | 1.57678600  | -0.24201400 |

|   |             |             |             |
|---|-------------|-------------|-------------|
| C | -2.02618800 | 5.33624900  | -1.04024800 |
| H | 0.08561700  | 4.92047500  | -0.97949500 |
| C | -3.31353500 | 4.81445800  | -0.90702500 |
| H | -4.47706600 | 3.03543600  | -0.51768500 |
| H | -1.88482200 | 6.38809100  | -1.27211500 |
| H | -4.17948400 | 5.45709100  | -1.03609600 |
| C | -5.64569419 | 0.10761458  | -0.96427870 |
| C | -4.34362119 | -0.33404642 | -0.71966670 |
| C | -3.98179119 | -0.81523442 | 0.54608930  |
| C | -4.95244919 | -0.84855042 | 1.55535130  |
| C | -6.25171519 | -0.40221942 | 1.31376830  |
| C | -6.60352019 | 0.07761458  | 0.05081930  |
| H | -5.91193119 | 0.47186758  | -1.95276070 |
| H | -3.59577919 | -0.31621742 | -1.50568570 |
| H | -4.68783319 | -1.23049342 | 2.53866530  |
| H | -6.99110319 | -0.43739442 | 2.10896830  |
| H | -7.61671219 | 0.41859358  | -0.14171370 |
| C | -2.56135319 | -1.26335842 | 0.84430230  |
| H | -2.58464019 | -1.95781142 | 1.69989330  |
| H | -1.97477919 | -0.39966342 | 1.17067530  |
| N | -1.93234319 | -1.82770142 | -0.35188870 |
| H | -2.50318519 | -2.61430242 | -0.65753170 |
| H | -0.86325874 | -1.49601815 | -3.36154691 |
| O | -0.98366200 | -2.39076600 | -3.62332800 |
| H | -1.63906612 | -3.93913756 | -2.78683959 |
| H | -0.39920422 | -4.48677126 | -2.05779459 |
| O | -0.88191147 | 0.04900827  | -3.17297683 |
| H | -0.23883147 | 0.64908027  | -3.57541883 |
| H | -0.17246300 | -2.68825400 | -4.06388200 |

**TS3W'**

|   |             |             |             |
|---|-------------|-------------|-------------|
| C | -6.61204700 | 0.81915600  | -1.04270500 |
| C | -5.62615600 | 0.13534200  | -0.33191700 |
| C | -5.30032800 | -1.18785100 | -0.66499700 |
| C | -5.98169500 | -1.81101300 | -1.71642000 |
| C | -6.97381100 | -1.12928900 | -2.42294100 |
| C | -7.28904200 | 0.18793200  | -2.08850500 |
| H | -6.85509800 | 1.84331300  | -0.77555400 |
| H | -5.10905800 | 0.62901600  | 0.48726400  |

|   |             |             |             |
|---|-------------|-------------|-------------|
| H | -5.73572500 | -2.83620300 | -1.98075500 |
| H | -7.49738200 | -1.62632600 | -3.23430800 |
| H | -8.05977700 | 0.71999000  | -2.63836900 |
| C | -4.22343100 | -1.92349700 | 0.09924400  |
| H | -4.20105200 | -2.98503100 | -0.16803800 |
| H | -4.39616700 | -1.87909800 | 1.18185600  |
| N | -2.90642600 | -1.33936700 | -0.17172800 |
| H | -2.88152000 | -0.52530900 | -0.77341200 |
| C | -1.76813300 | -1.70921800 | 0.42478400  |
| S | -1.65191600 | -2.99428700 | 1.50438600  |
| C | -0.57480000 | -0.87719600 | 0.11989300  |
| C | 0.50277900  | -1.35253900 | -0.56660500 |
| O | 1.71458700  | -1.53441400 | 2.22674800  |
| C | 0.63645500  | -2.60396100 | -1.36989100 |
| H | -0.30497700 | -3.15548000 | -1.34944900 |
| H | 0.87782900  | -2.39110300 | -2.41925000 |
| H | 1.42448200  | -3.26157800 | -0.98670400 |
| H | 2.97704100  | 1.27794300  | 2.28432300  |
| C | -0.44178500 | 0.52055900  | 0.51615800  |
| C | -1.54397000 | 1.34210400  | 1.07865100  |
| C | -1.85617000 | 2.60112200  | 0.53223900  |
| C | -2.29700300 | 0.89061200  | 2.17732600  |
| C | -2.88982700 | 3.37210700  | 1.05781300  |
| H | -1.27651000 | 2.97040200  | -0.30750200 |
| C | -3.33413500 | 1.66482900  | 2.70097300  |
| H | -2.05775400 | -0.06537500 | 2.63270500  |
| C | -3.63813300 | 2.90779900  | 2.14356300  |
| H | -3.11394000 | 4.33919700  | 0.61637500  |
| H | -3.89540200 | 1.29841700  | 3.55615300  |
| H | -4.44101500 | 3.51245600  | 2.55513400  |
| C | 0.77894400  | 1.06974500  | 0.21938200  |
| C | 1.53246600  | 2.17121800  | 0.53591800  |
| H | 1.37384900  | 2.57955200  | 1.53503300  |
| C | 2.30451000  | 3.00737700  | -0.38006000 |
| C | 2.14531400  | 2.95728000  | -1.78468700 |
| C | 3.22351900  | 3.95493100  | 0.12443000  |
| C | 2.88692900  | 3.77867200  | -2.62988300 |
| H | 1.40490800  | 2.28210200  | -2.20634300 |
| C | 3.95192000  | 4.78527800  | -0.72177200 |

|   |            |             |             |
|---|------------|-------------|-------------|
| H | 3.36022700 | 4.03165700  | 1.20078700  |
| C | 3.79935200 | 4.69922100  | -2.10848300 |
| H | 2.73633900 | 3.71379600  | -3.70472600 |
| H | 4.64897800 | 5.50243900  | -0.29600700 |
| H | 4.37114100 | 5.34444000  | -2.76841200 |
| C | 5.37581300 | -2.60825100 | 0.03797300  |
| C | 4.41919700 | -1.60295000 | -0.08634700 |
| C | 3.71783500 | -1.42747900 | -1.28665600 |
| C | 4.01451100 | -2.26126800 | -2.37040300 |
| C | 4.98648200 | -3.25670700 | -2.25524500 |
| C | 5.66422800 | -3.43650900 | -1.04879200 |
| H | 5.88526800 | -2.73447100 | 0.98763500  |
| H | 4.22325000 | -0.95799500 | 0.76462800  |
| H | 3.48431800 | -2.13084600 | -3.31061300 |
| H | 5.20823200 | -3.89424000 | -3.10617300 |
| H | 6.41325000 | -4.21749700 | -0.95624100 |
| C | 2.68830500 | -0.32263700 | -1.40808600 |
| H | 2.24733600 | -0.29169500 | -2.40637300 |
| H | 3.15636500 | 0.64657600  | -1.22647500 |
| N | 1.57966700 | -0.41580600 | -0.41397400 |
| H | 1.96271900 | -0.63314500 | 0.52284300  |
| H | 4.06948900 | -0.75481900 | 3.22317700  |
| O | 4.25493300 | -1.72265000 | 3.23113900  |
| H | 2.50458500 | -1.98573200 | 2.59106400  |
| H | 0.95375700 | -2.13791500 | 2.23325000  |
| O | 3.02035200 | 0.71176500  | 3.07268600  |
| H | 2.23844400 | 0.13625300  | 2.96873600  |
| H | 4.43399000 | -1.93600200 | 4.15519500  |

**Int3W'**

|   |             |             |             |
|---|-------------|-------------|-------------|
| C | -6.61204700 | 0.81915600  | -1.04270500 |
| C | -5.62615600 | 0.13534200  | -0.33191700 |
| C | -5.30032800 | -1.18785100 | -0.66499700 |
| C | -5.98169500 | -1.81101300 | -1.71642000 |
| C | -6.97381100 | -1.12928900 | -2.42294100 |
| C | -7.28904200 | 0.18793200  | -2.08850500 |
| H | -6.85509800 | 1.84331300  | -0.77555400 |
| H | -5.10905800 | 0.62901600  | 0.48726400  |
| H | -5.73572500 | -2.83620300 | -1.98075500 |

|   |             |             |             |
|---|-------------|-------------|-------------|
| H | -7.49738200 | -1.62632600 | -3.23430800 |
| H | -8.05977700 | 0.71999000  | -2.63836900 |
| C | -4.22343100 | -1.92349700 | 0.09924400  |
| H | -4.20105200 | -2.98503100 | -0.16803800 |
| H | -4.39616700 | -1.87909800 | 1.18185600  |
| N | -2.90642600 | -1.33936700 | -0.17172800 |
| H | -2.88152000 | -0.52530900 | -0.77341200 |
| C | -1.76813300 | -1.70921800 | 0.42478400  |
| S | -1.65191600 | -2.99428700 | 1.50438600  |
| C | -0.57480000 | -0.87719600 | 0.11989300  |
| C | 0.50277900  | -1.35253900 | -0.56660500 |
| O | 1.71458700  | -1.53441400 | 2.22674800  |
| C | 0.63645500  | -2.60396100 | -1.36989100 |
| H | -0.30497700 | -3.15548000 | -1.34944900 |
| H | 0.87782900  | -2.39110300 | -2.41925000 |
| H | 1.42448200  | -3.26157800 | -0.98670400 |
| H | 2.97704100  | 1.27794300  | 2.28432300  |
| C | -0.44178500 | 0.52055900  | 0.51615800  |
| C | -1.54397000 | 1.34210400  | 1.07865100  |
| C | -1.85617000 | 2.60112200  | 0.53223900  |
| C | -2.29700300 | 0.89061200  | 2.17732600  |
| C | -2.88982700 | 3.37210700  | 1.05781300  |
| H | -1.27651000 | 2.97040200  | -0.30750200 |
| C | -3.33413500 | 1.66482900  | 2.70097300  |
| H | -2.05775400 | -0.06537500 | 2.63270500  |
| C | -3.63813300 | 2.90779900  | 2.14356300  |
| H | -3.11394000 | 4.33919700  | 0.61637500  |
| H | -3.89540200 | 1.29841700  | 3.55615300  |
| H | -4.44101500 | 3.51245600  | 2.55513400  |
| C | 0.83059383  | 0.97392103  | 0.17852801  |
| C | 1.58411583  | 2.07539403  | 0.49506401  |
| H | 1.42549883  | 2.48372803  | 1.49417901  |
| C | 2.35615983  | 2.91155303  | -0.42091399 |
| C | 2.19696383  | 2.86145603  | -1.82554099 |
| C | 3.27516883  | 3.85910703  | 0.08357601  |
| C | 2.93857883  | 3.68284803  | -2.67073699 |
| H | 1.45655783  | 2.18627803  | -2.24719699 |
| C | 4.00356983  | 4.68945403  | -0.76262599 |
| H | 3.41187683  | 3.93583303  | 1.15993301  |

|   |            |             |             |
|---|------------|-------------|-------------|
| C | 3.85100183 | 4.60339703  | -2.14933699 |
| H | 2.78798883 | 3.61797203  | -3.74557999 |
| H | 4.70062783 | 5.40661503  | -0.33686099 |
| H | 4.42279083 | 5.24861603  | -2.80926599 |
| C | 5.32416317 | -2.51242703 | 0.07882699  |
| C | 4.36754717 | -1.50712603 | -0.04549301 |
| C | 3.66618517 | -1.33165503 | -1.24580201 |
| C | 3.96286117 | -2.16544403 | -2.32954901 |
| C | 4.93483217 | -3.16088303 | -2.21439101 |
| C | 5.61257817 | -3.34068503 | -1.00793801 |
| H | 5.83361817 | -2.63864703 | 1.02848899  |
| H | 4.17160017 | -0.86217103 | 0.80548199  |
| H | 3.43266817 | -2.03502203 | -3.26975901 |
| H | 5.15658217 | -3.79841603 | -3.06531901 |
| H | 6.36160017 | -4.12167303 | -0.91538701 |
| C | 2.63665517 | -0.22681303 | -1.36723201 |
| H | 2.19568617 | -0.19587103 | -2.36551901 |
| H | 3.10471517 | 0.74239997  | -1.18562101 |
| N | 1.52801717 | -0.31998203 | -0.37312001 |
| H | 1.91106917 | -0.53732103 | 0.56369699  |
| H | 4.06948900 | -0.75481900 | 3.22317700  |
| O | 4.25493300 | -1.72265000 | 3.23113900  |
| H | 2.50458500 | -1.98573200 | 2.59106400  |
| H | 0.95375700 | -2.13791500 | 2.23325000  |
| O | 3.02035200 | 0.71176500  | 3.07268600  |
| H | 2.23844400 | 0.13625300  | 2.96873600  |
| H | 4.43399000 | -1.93600200 | 4.15519500  |

**TS4W'**

|   |            |             |             |
|---|------------|-------------|-------------|
| C | 6.25382300 | 0.82819800  | 1.12200000  |
| C | 5.38351700 | 0.03598200  | 0.37421100  |
| C | 5.07769100 | -1.26884500 | 0.78875900  |
| C | 5.66186900 | -1.76278400 | 1.96040700  |
| C | 6.53907500 | -0.97264700 | 2.70521100  |
| C | 6.83500200 | 0.32530500  | 2.28821600  |
| H | 6.48132800 | 1.83702900  | 0.79052900  |
| H | 4.94126500 | 0.43053700  | -0.53705400 |
| H | 5.43021800 | -2.77252800 | 2.28931400  |
| H | 6.98777600 | -1.37040300 | 3.61073700  |

|   |             |             |             |
|---|-------------|-------------|-------------|
| H | 7.51594700  | 0.94192700  | 2.86749700  |
| C | 4.12945800  | -2.12397200 | -0.02057700 |
| H | 4.09607200  | -3.14990200 | 0.36203300  |
| H | 4.44671400  | -2.19719400 | -1.06816700 |
| N | 2.77778900  | -1.56076700 | 0.00369500  |
| H | 2.64533800  | -0.71846000 | 0.54946900  |
| C | 1.74560900  | -2.01852500 | -0.72265300 |
| S | 1.84526600  | -3.36201700 | -1.71727200 |
| C | 0.51044900  | -1.19595800 | -0.58769300 |
| C | -0.68340800 | -1.64906200 | -0.13861700 |
| O | -2.72451000 | -1.12916400 | -2.49420300 |
| C | -1.12083700 | -3.01683800 | 0.25879800  |
| H | -0.33035900 | -3.72292200 | 0.00217500  |
| H | -1.33477200 | -3.09808200 | 1.32932100  |
| H | -2.03173800 | -3.32221000 | -0.26687800 |
| H | -2.62993300 | 2.00809600  | -1.51924800 |
| C | 0.44648500  | 0.25234100  | -0.83125900 |
| C | 1.56122300  | 1.08500200  | -1.33667100 |
| C | 1.88294100  | 2.31498100  | -0.73423300 |
| C | 2.32668000  | 0.66139000  | -2.43846300 |
| C | 2.93181800  | 3.09434100  | -1.22044200 |
| H | 1.30796900  | 2.65815100  | 0.11987300  |
| C | 3.37768400  | 1.44153200  | -2.92016000 |
| H | 2.08662100  | -0.27899200 | -2.92538500 |
| C | 3.68503500  | 2.66182000  | -2.31402800 |
| H | 3.16218600  | 4.04098500  | -0.74012000 |
| H | 3.95018300  | 1.09859300  | -3.77730500 |
| H | 4.50018700  | 3.27130600  | -2.69312600 |
| C | -0.81381000 | 0.70391500  | -0.54703100 |
| C | -1.45574000 | 1.99756300  | -0.70819600 |
| H | -0.80121700 | 2.60712000  | -1.34356500 |
| C | -1.79213500 | 2.79154600  | 0.53559500  |
| C | -1.14366200 | 2.59504900  | 1.76967600  |
| C | -2.76608100 | 3.80659500  | 0.46983400  |
| C | -1.45191800 | 3.37211300  | 2.88856900  |
| H | -0.37691000 | 1.82739000  | 1.84952800  |
| C | -3.06340600 | 4.59245200  | 1.58189900  |
| H | -3.30264600 | 3.94604600  | -0.46378600 |
| C | -2.41143500 | 4.38009100  | 2.79963900  |

|   |             |             |             |
|---|-------------|-------------|-------------|
| H | -0.93260700 | 3.19469900  | 3.82721500  |
| H | -3.81965300 | 5.36913300  | 1.50117600  |
| H | -2.65095300 | 4.98957600  | 3.66632000  |
| C | -5.71768600 | -2.46646900 | 0.45851000  |
| C | -4.71622800 | -1.52258300 | 0.22662700  |
| C | -3.66804000 | -1.36839600 | 1.14661700  |
| C | -3.67143400 | -2.14527700 | 2.31273400  |
| C | -4.67832900 | -3.08159400 | 2.54708800  |
| C | -5.70097200 | -3.25057500 | 1.61336200  |
| H | -6.52360700 | -2.57454500 | -0.26145500 |
| H | -4.77555400 | -0.90139600 | -0.66267900 |
| H | -2.88162500 | -2.01069100 | 3.04787600  |
| H | -4.66434900 | -3.67369100 | 3.45731800  |
| H | -6.48710300 | -3.97857200 | 1.79091800  |
| C | -2.60540000 | -0.30890800 | 0.95835600  |
| H | -2.00403800 | -0.19265300 | 1.86088100  |
| H | -3.07254200 | 0.65259400  | 0.74587300  |
| N | -1.62826900 | -0.51683100 | -0.18995000 |
| H | -2.18889100 | -0.72112900 | -1.11527800 |
| H | -4.45676700 | 1.08491300  | -2.48749000 |
| O | -4.92932800 | 0.16938100  | -2.67906300 |
| H | -3.60624800 | -0.66554500 | -2.68578800 |
| H | -2.89315200 | -2.07692900 | -2.56487000 |
| O | -3.60467100 | 2.24088300  | -2.19565700 |
| H | -3.22051800 | 2.56154100  | -3.02357400 |
| H | -5.39648800 | 0.26615100  | -3.51727000 |

**Int4W'**

|   |             |             |             |
|---|-------------|-------------|-------------|
| C | -6.28622700 | 0.79962700  | 0.28075700  |
| C | -5.24238600 | -0.11594800 | 0.15382600  |
| C | -5.05328100 | -0.81662500 | -1.04666300 |
| C | -5.93143100 | -0.58423100 | -2.11109200 |
| C | -6.98150700 | 0.32651200  | -1.98215900 |
| C | -7.15968400 | 1.02207700  | -0.78617000 |
| H | -6.41898700 | 1.33636500  | 1.21554700  |
| H | -4.57087600 | -0.28853800 | 0.99070000  |
| H | -5.79224000 | -1.12108300 | -3.04589600 |
| H | -7.65632000 | 0.49401000  | -2.81655500 |
| H | -7.97484000 | 1.73262600  | -0.68482200 |



|   |             |             |             |
|---|-------------|-------------|-------------|
| C | -3.91906500 | -1.80749200 | -1.18602400 |
| H | -3.96965000 | -2.32556000 | -2.15013700 |
| H | -3.96740300 | -2.58801600 | -0.41664500 |
| N | -2.62552800 | -1.13448700 | -1.06569700 |
| H | -2.63794600 | -0.12499000 | -0.99740700 |
| C | -1.43388100 | -1.75096000 | -0.99901100 |
| S | -1.29263600 | -3.42958400 | -1.14120900 |
| C | -0.28781200 | -0.85746000 | -0.76480200 |
| C | 0.89460300  | -0.83599500 | -1.49753300 |
| O | 0.64703600  | -3.24914600 | 1.62701400  |
| C | 1.32248300  | -1.63434400 | -2.68601800 |
| H | 0.55367900  | -2.36424000 | -2.93661000 |
| H | 1.49526800  | -0.99291300 | -3.55991400 |
| H | 2.25202600  | -2.17912800 | -2.49024500 |
| H | 2.63312400  | 1.50029900  | 1.26861300  |
| C | -0.21516500 | 0.20468800  | 0.21365100  |
| C | -1.18220100 | 0.48118700  | 1.30009500  |
| C | -1.65942900 | 1.78120300  | 1.54225400  |
| C | -1.63411100 | -0.55907900 | 2.13640500  |
| C | -2.54839300 | 2.03792100  | 2.58788900  |
| H | -1.33403600 | 2.59543900  | 0.90142500  |
| C | -2.52804900 | -0.30080100 | 3.17527600  |
| H | -1.26091500 | -1.56769300 | 1.98339500  |
| C | -2.98921700 | 0.99847300  | 3.40716800  |
| H | -2.90009800 | 3.05188700  | 2.75619700  |
| H | -2.85820400 | -1.11699900 | 3.81204700  |
| H | -3.68148900 | 1.19709900  | 4.22018700  |
| C | 1.01648300  | 0.81761000  | 0.05084500  |
| C | 1.67170000  | 1.87111700  | 0.89329800  |
| H | 1.04725300  | 1.99607400  | 1.78476300  |
| C | 1.87279000  | 3.23659900  | 0.24285900  |
| C | 1.01725800  | 3.71530900  | -0.75806900 |
| C | 2.91622700  | 4.06548600  | 0.67857000  |
| C | 1.19274700  | 4.98976800  | -1.30037300 |
| H | 0.21509100  | 3.07887600  | -1.12115000 |
| C | 3.09413800  | 5.33933800  | 0.13898200  |
| H | 3.59437800  | 3.70750900  | 1.44967600  |
| C | 2.23076700  | 5.80763100  | -0.85316000 |
| H | 0.51852600  | 5.34142200  | -2.07640400 |

|   |            |             |             |
|---|------------|-------------|-------------|
| H | 3.91012100 | 5.96428700  | 0.49085800  |
| H | 2.36945300 | 6.79797600  | -1.27674800 |
| C | 5.01106200 | -2.16053300 | 0.40448300  |
| C | 3.99433600 | -1.26505900 | 0.06495700  |
| C | 4.08872500 | -0.49275400 | -1.09740200 |
| C | 5.22045300 | -0.62369200 | -1.91188900 |
| C | 6.24319600 | -1.50699400 | -1.56689800 |
| C | 6.13837900 | -2.28088500 | -0.40920400 |
| H | 4.90106700 | -2.76515000 | 1.29998900  |
| H | 3.12504500 | -1.17365400 | 0.70689800  |
| H | 5.30080400 | -0.03439300 | -2.82286700 |
| H | 7.11441700 | -1.60012000 | -2.20920300 |
| H | 6.92884200 | -2.97854300 | -0.14769500 |
| C | 3.01116300 | 0.51114100  | -1.48225600 |
| H | 2.97242400 | 0.60740800  | -2.57254900 |
| H | 3.26144300 | 1.50388800  | -1.10029400 |
| N | 1.67064100 | 0.18614300  | -0.99725700 |
| H | 0.91937600 | -2.31319900 | 1.65059700  |
| H | 2.44891800 | -1.80006200 | 3.04925200  |
| O | 3.00530200 | -3.55065600 | 2.90865000  |
| H | 2.22039700 | -3.72281400 | 2.33670800  |
| H | 0.30578300 | -3.41091800 | 0.72693500  |
| O | 1.95438800 | -1.00004200 | 2.76357600  |
| H | 1.25409200 | -0.87887700 | 3.41689900  |
| H | 2.88604000 | -4.12481300 | 3.67498800  |

**Com1W**

|   |             |            |             |
|---|-------------|------------|-------------|
| C | -4.29601000 | 0.88147500 | 3.09441100  |
| C | -4.03951600 | 0.86103800 | 1.72066800  |
| C | -2.93138100 | 1.53314300 | 1.19245100  |
| C | -2.07747600 | 2.22316600 | 2.06592000  |
| C | -2.33204400 | 2.24268900 | 3.43597500  |
| C | -3.44318000 | 1.57199000 | 3.95486500  |
| H | -5.16236600 | 0.35812500 | 3.48923200  |
| H | -4.70497700 | 0.31942500 | 1.05332900  |
| H | -1.21099800 | 2.74403300 | 1.66681100  |
| H | -1.66577600 | 2.78545800 | 4.10049900  |
| H | -3.64175400 | 1.59012600 | 5.02260000  |
| C | -2.65371600 | 1.52349900 | -0.29762600 |

|   |             |             |             |
|---|-------------|-------------|-------------|
| H | -2.56998800 | 2.53877700  | -0.69537900 |
| H | -3.47101800 | 1.02438800  | -0.83119700 |
| N | -1.39404000 | 0.84575900  | -0.59496700 |
| H | -1.27996700 | -0.09031300 | -0.16889100 |
| C | -0.44557800 | 1.30860700  | -1.41817500 |
| S | -0.55257200 | 2.70413500  | -2.34146600 |
| C | 0.82259300  | 0.44193600  | -1.39520200 |
| C | 1.55561100  | 0.33727900  | -2.75139200 |
| O | 2.75134900  | 0.53654500  | -2.84415800 |
| C | 0.74302300  | -0.16552800 | -3.92874300 |
| H | 0.27432500  | -1.12601500 | -3.68155100 |
| H | -0.05444500 | 0.54145400  | -4.16931400 |
| H | 1.40251000  | -0.29239500 | -4.78811300 |
| H | 0.50184900  | -0.58996600 | -1.19067200 |
| C | 1.75243500  | 0.82424100  | -0.22528400 |
| C | 2.16906600  | 2.23014600  | 0.07234800  |
| C | 2.67671300  | 3.09359900  | -0.91084100 |
| C | 2.07888900  | 2.69462500  | 1.39509300  |
| C | 3.08346600  | 4.38281200  | -0.57114500 |
| H | 2.76848000  | 2.74813100  | -1.93168200 |
| C | 2.48657600  | 3.98497200  | 1.73082700  |
| H | 1.68108100  | 2.03350000  | 2.15920300  |
| C | 2.99055000  | 4.83495300  | 0.74621500  |
| H | 3.47724800  | 5.03707300  | -1.34352000 |
| H | 2.40678200  | 4.32500500  | 2.75953500  |
| H | 3.30647900  | 5.84220100  | 1.00222300  |
| C | 2.14955700  | -0.14858900 | 0.56391900  |
| C | 2.57816000  | -1.14448600 | 1.30883900  |
| H | 2.02190200  | -1.40271300 | 2.21086000  |
| C | 3.75533600  | -1.98690600 | 1.01230900  |
| C | 4.53958200  | -1.79193200 | -0.14067800 |
| C | 4.09715500  | -3.03035300 | 1.89085400  |
| C | 5.63235400  | -2.61356600 | -0.39507000 |
| H | 4.27949900  | -0.99450400 | -0.83132100 |
| C | 5.19397900  | -3.85374200 | 1.62923100  |
| H | 3.50075000  | -3.18730000 | 2.78627800  |
| C | 5.96611300  | -3.64781600 | 0.48677800  |
| H | 6.22900800  | -2.44850500 | -1.28757100 |
| H | 5.44615400  | -4.65122500 | 2.32251700  |

|   |             |             |             |
|---|-------------|-------------|-------------|
| H | 6.82119000  | -4.28525900 | 0.28248700  |
| C | -5.89870700 | -2.35784500 | -0.44600300 |
| C | -4.66446600 | -2.79942800 | 0.03627300  |
| C | -3.48141100 | -2.53002200 | -0.66207300 |
| C | -3.56187300 | -1.81083800 | -1.86243800 |
| C | -4.79160500 | -1.36868400 | -2.35005900 |
| C | -5.96453100 | -1.64002400 | -1.64081900 |
| H | -6.80673600 | -2.58036000 | 0.10703800  |
| H | -4.61951600 | -3.36573100 | 0.96372800  |
| H | -2.65287600 | -1.59545600 | -2.41781600 |
| H | -4.83565200 | -0.81724400 | -3.28470900 |
| H | -6.92290600 | -1.29931400 | -2.02129900 |
| C | -2.14508800 | -2.98358700 | -0.11624200 |
| H | -1.49615100 | -3.30047900 | -0.94005000 |
| H | -2.30053600 | -3.86844100 | 0.51982000  |
| N | -1.44084600 | -1.89854300 | 0.60192400  |
| H | -1.99929100 | -1.62164500 | 1.40907900  |
| H | -0.57233800 | -2.29363100 | 0.96951700  |
| O | 0.84870900  | -3.80530700 | 1.39787400  |
| H | 0.74470600  | -4.76433600 | 1.37533500  |
| H | 1.72277300  | -3.64038200 | 1.01690500  |

**TS1W**

|   |             |             |             |
|---|-------------|-------------|-------------|
| C | -6.47347300 | -0.13403600 | 0.83875900  |
| C | -5.17562500 | -0.62740500 | 0.71491500  |
| C | -4.89037200 | -1.65486700 | -0.19619000 |
| C | -5.92837500 | -2.17695700 | -0.97496000 |
| C | -7.22979400 | -1.68785600 | -0.84708700 |
| C | -7.50453900 | -0.66435000 | 0.05940700  |
| H | -6.68208300 | 0.66183900  | 1.54792100  |
| H | -4.37610400 | -0.21202500 | 1.32269700  |
| H | -5.71650900 | -2.97203600 | -1.68528000 |
| H | -8.02552900 | -2.10423200 | -1.45789700 |
| H | -8.51580700 | -0.28095200 | 0.15919600  |
| C | -3.48600600 | -2.20237200 | -0.31835200 |
| H | -3.45378300 | -3.04211500 | -1.02323300 |
| H | -3.12344500 | -2.59256800 | 0.63926200  |
| N | -2.54860500 | -1.16614400 | -0.75222700 |
| H | -2.91418500 | -0.33014100 | -1.21208800 |

|   |             |             |             |
|---|-------------|-------------|-------------|
| C | -1.22667400 | -1.29326400 | -0.73348100 |
| S | -0.44499400 | -2.70191900 | -0.22378400 |
| C | -0.39295900 | -0.08543200 | -1.18974100 |
| C | -1.04188400 | 0.89105900  | -2.18779900 |
| O | -2.25428900 | 1.01831600  | -2.32295000 |
| C | -0.09341600 | 1.74096400  | -3.00944100 |
| H | 0.80888200  | 1.19378700  | -3.29502700 |
| H | -0.62311400 | 2.10744600  | -3.89053400 |
| H | 0.22511800  | 2.60227500  | -2.41241800 |
| H | 0.44378900  | -0.51208800 | -1.74791100 |
| C | 0.23931200  | 0.68286300  | -0.00845200 |
| C | -0.57497800 | 1.22837100  | 1.10043600  |
| C | -1.88981200 | 1.71149500  | 0.92182800  |
| C | -0.04552000 | 1.30055700  | 2.40878300  |
| C | -2.62584000 | 2.22817300  | 1.98983700  |
| H | -2.34294600 | 1.71102100  | -0.06123500 |
| C | -0.77718700 | 1.82682000  | 3.46731800  |
| H | 0.95889800  | 0.93066800  | 2.58827800  |
| C | -2.08007400 | 2.29235400  | 3.27096800  |
| H | -3.63172100 | 2.59750400  | 1.80644600  |
| H | -0.33056600 | 1.86083400  | 4.45757700  |
| H | -2.65410100 | 2.69763400  | 4.09871700  |
| C | 1.60669800  | 0.75694700  | 0.04647000  |
| C | 2.63126100  | 1.62934900  | 0.18240400  |
| H | 3.60990600  | 1.24381000  | 0.46192100  |
| C | 2.59282600  | 3.08699000  | 0.01114800  |
| C | 1.40729700  | 3.84034600  | -0.11666500 |
| C | 3.81907600  | 3.78374300  | -0.03369400 |
| C | 1.45782400  | 5.21833700  | -0.31853000 |
| H | 0.44861300  | 3.34450500  | -0.03064600 |
| C | 3.86419100  | 5.16135900  | -0.22602200 |
| H | 4.74703500  | 3.22780100  | 0.08106500  |
| C | 2.68141300  | 5.88883900  | -0.37707500 |
| H | 0.52957400  | 5.77523900  | -0.41221300 |
| H | 4.82462500  | 5.66850700  | -0.25787500 |
| H | 2.71281000  | 6.96417200  | -0.52459000 |
| C | 3.73056800  | -5.20651000 | 0.78678300  |
| C | 3.14208600  | -3.96249000 | 1.01138700  |
| C | 3.86071500  | -2.78249300 | 0.77522900  |

|   |            |             |             |
|---|------------|-------------|-------------|
| C | 5.18033300 | -2.87518000 | 0.31481100  |
| C | 5.77098900 | -4.11898600 | 0.08989000  |
| C | 5.04597000 | -5.28794900 | 0.32525700  |
| H | 3.16251500 | -6.11262200 | 0.97549700  |
| H | 2.11768000 | -3.90314200 | 1.36868500  |
| H | 5.75183800 | -1.96673500 | 0.13727500  |
| H | 6.79680800 | -4.17482500 | -0.26268700 |
| H | 5.50436900 | -6.25739700 | 0.15369300  |
| C | 3.21647800 | -1.42846800 | 0.98983100  |
| H | 3.98442300 | -0.68121000 | 1.20660300  |
| H | 2.52664100 | -1.45367400 | 1.83798600  |
| N | 2.43139900 | -0.96347300 | -0.18006500 |
| H | 2.99162100 | -0.92887100 | -1.03672400 |
| H | 1.63571300 | -1.60870400 | -0.31950200 |
| O | 3.11938500 | 0.30130700  | -2.71124600 |
| H | 3.76737200 | 0.61261000  | -3.35538300 |
| H | 2.99818100 | 1.03499500  | -2.08525100 |

**Int1W**

|   |            |             |             |
|---|------------|-------------|-------------|
| C | 6.32601300 | 0.22244000  | -0.98059700 |
| C | 5.07138400 | -0.35897400 | -0.80404500 |
| C | 4.92809100 | -1.51015600 | -0.01590900 |
| C | 6.06195000 | -2.06498800 | 0.58653200  |
| C | 7.31968900 | -1.48701900 | 0.40425200  |
| C | 7.45390400 | -0.34106300 | -0.37905500 |
| H | 6.42376900 | 1.11459600  | -1.59232000 |
| H | 4.19728700 | 0.08647000  | -1.27132300 |
| H | 5.95996200 | -2.95502600 | 1.20234900  |
| H | 8.19092300 | -1.92954600 | 0.87835300  |
| H | 8.43078800 | 0.11229900  | -0.51960100 |
| C | 3.57228400 | -2.15832700 | 0.15845300  |
| H | 3.64273200 | -3.03476600 | 0.81450500  |
| H | 3.17447300 | -2.51857100 | -0.79645900 |
| N | 2.59669500 | -1.21499700 | 0.70538300  |
| H | 2.93156400 | -0.44474400 | 1.28779500  |
| C | 1.28161500 | -1.37510000 | 0.66704500  |
| S | 0.52940000 | -2.74795100 | 0.01299200  |
| C | 0.39984300 | -0.25483600 | 1.23536000  |
| C | 0.99301800 | 0.61809600  | 2.35497000  |

|   |             |             |             |
|---|-------------|-------------|-------------|
| O | 2.19217900  | 0.68467600  | 2.60366200  |
| C | 0.00256600  | 1.42946800  | 3.16751400  |
| H | -0.98136200 | 0.95792400  | 3.22551800  |
| H | 0.41629300  | 1.58475800  | 4.16629400  |
| H | -0.12777800 | 2.40947700  | 2.69748600  |
| H | -0.39962200 | -0.77917500 | 1.76777500  |
| C | -0.28353000 | 0.60140500  | 0.14917200  |
| C | 0.49014400  | 1.48329500  | -0.73002100 |
| C | 1.81737300  | 1.89828500  | -0.45512100 |
| C | -0.05362700 | 1.94065600  | -1.95914900 |
| C | 2.54212200  | 2.69087000  | -1.34578700 |
| H | 2.29813800  | 1.62094100  | 0.47197600  |
| C | 0.67132800  | 2.73231700  | -2.84022200 |
| H | -1.06460200 | 1.65313400  | -2.22410800 |
| C | 1.98308700  | 3.11762300  | -2.54914600 |
| H | 3.55480700  | 2.98451300  | -1.07989400 |
| H | 0.20533000  | 3.04918900  | -3.76988400 |
| H | 2.54756500  | 3.73871300  | -3.23787800 |
| C | -1.68691700 | 0.46383500  | 0.02149800  |
| C | -2.73274600 | 1.35644700  | -0.16098700 |
| H | -3.68932200 | 0.92921300  | -0.45872800 |
| C | -2.78480500 | 2.80728800  | -0.05447000 |
| C | -1.70959400 | 3.64464100  | 0.32334800  |
| C | -4.02890400 | 3.43793600  | -0.30452600 |
| C | -1.88780300 | 5.01942300  | 0.46935100  |
| H | -0.73141700 | 3.21826700  | 0.49321000  |
| C | -4.19776400 | 4.80981800  | -0.16773800 |
| H | -4.87522700 | 2.82496500  | -0.60848200 |
| C | -3.12504200 | 5.61626700  | 0.22542100  |
| H | -1.03974400 | 5.63209900  | 0.76362000  |
| H | -5.16894800 | 5.25370600  | -0.37028300 |
| H | -3.25109800 | 6.68972600  | 0.32980900  |
| C | -3.40894900 | -5.28615800 | -0.98061500 |
| C | -2.80369400 | -4.04956500 | -1.20641300 |
| C | -3.48469300 | -2.86298700 | -0.90743600 |
| C | -4.78245400 | -2.93662400 | -0.38237200 |
| C | -5.38657000 | -4.17191200 | -0.15287200 |
| C | -4.69898800 | -5.34966900 | -0.45216800 |
| H | -2.87157300 | -6.19918600 | -1.21799600 |

|   |             |             |             |
|---|-------------|-------------|-------------|
| H | -1.79822800 | -4.00208400 | -1.61335200 |
| H | -5.32521200 | -2.02072800 | -0.15849200 |
| H | -6.39373200 | -4.21536800 | 0.25073300  |
| H | -5.16904600 | -6.31290200 | -0.27777200 |
| C | -2.84087900 | -1.51715500 | -1.13656100 |
| H | -3.57263500 | -0.78431500 | -1.47387300 |
| H | -2.03382400 | -1.56540900 | -1.86957300 |
| N | -2.20544800 | -0.98193600 | 0.13025200  |
| H | -2.85746700 | -1.05028200 | 0.92873700  |
| H | -1.39181400 | -1.62335900 | 0.29196900  |
| O | -3.33571900 | -0.04637800 | 2.53081200  |
| H | -4.13264900 | 0.06116500  | 3.06442600  |
| H | -3.26385300 | 0.76021000  | 1.98611500  |

**TS2W**

|   |             |             |             |
|---|-------------|-------------|-------------|
| C | 5.81997000  | -0.99724300 | -1.17649200 |
| C | 4.48442400  | -1.32076900 | -0.94096200 |
| C | 4.14816800  | -2.51421500 | -0.28597900 |
| C | 5.17297800  | -3.37417300 | 0.12319000  |
| C | 6.50971400  | -3.05521600 | -0.12106100 |
| C | 6.83628000  | -1.86451400 | -0.77002400 |
| H | 6.06582400  | -0.06669300 | -1.67959900 |
| H | 3.70006500  | -0.64074200 | -1.26258400 |
| H | 4.92309300  | -4.29893600 | 0.63692500  |
| H | 7.29385700  | -3.73341900 | 0.20256900  |
| H | 7.87604400  | -1.61189800 | -0.95597300 |
| C | 2.70106100  | -2.88535400 | -0.04908000 |
| H | 2.62713500  | -3.80258300 | 0.54780800  |
| H | 2.18073200  | -3.09349300 | -0.99151800 |
| N | 1.97646700  | -1.80590200 | 0.62099300  |
| H | 2.51187500  | -1.10533800 | 1.13552500  |
| C | 0.65835700  | -1.77436900 | 0.78442400  |
| S | -0.39573400 | -2.97977900 | 0.25667400  |
| C | 0.08031100  | -0.52366200 | 1.45668800  |
| C | 0.90385500  | 0.06079300  | 2.61724600  |
| O | 2.11810400  | -0.04462000 | 2.69305600  |
| C | 0.10428900  | 0.77648400  | 3.68383300  |
| H | -0.66287000 | 1.41672200  | 3.23868500  |
| H | -0.41269200 | 0.03344800  | 4.30384600  |



|   |             |             |             |
|---|-------------|-------------|-------------|
| H | 0.77204100  | 1.36091700  | 4.31795100  |
| H | -0.85294400 | -0.84273800 | 1.92512500  |
| C | -0.25045400 | 0.57068900  | 0.41471100  |
| C | 0.87779600  | 1.37059500  | -0.15387800 |
| C | 1.65537300  | 2.27610900  | 0.58546300  |
| C | 1.19673400  | 1.18803200  | -1.51193600 |
| C | 2.71467100  | 2.96400900  | -0.00580300 |
| H | 1.41892400  | 2.47436200  | 1.62440000  |
| C | 2.25302100  | 1.87676700  | -2.10689400 |
| H | 0.60159000  | 0.49490400  | -2.09872000 |
| C | 3.02039300  | 2.76601900  | -1.35197500 |
| H | 3.29404000  | 3.66550400  | 0.58701600  |
| H | 2.47469800  | 1.71965500  | -3.15888900 |
| H | 3.84307600  | 3.30651800  | -1.81109600 |
| C | -1.51335100 | 0.75423400  | -0.07191100 |
| C | -2.14289200 | 1.94803100  | -0.64320500 |
| H | -2.54554200 | 1.79345600  | -1.65041100 |
| C | -1.52830200 | 3.29550700  | -0.49306800 |
| C | -1.37658900 | 3.87346700  | 0.78236500  |
| C | -1.19609900 | 4.08615000  | -1.60530300 |
| C | -0.89025700 | 5.16878100  | 0.93777200  |
| H | -1.68217600 | 3.30059100  | 1.65423600  |
| C | -0.71807700 | 5.38855700  | -1.45389100 |
| H | -1.31091200 | 3.66878600  | -2.60279600 |
| C | -0.55507000 | 5.93620200  | -0.18143000 |
| H | -0.78961400 | 5.58997600  | 1.93497600  |
| H | -0.46845300 | 5.97500300  | -2.33441300 |
| H | -0.18235300 | 6.94944300  | -0.06185400 |
| C | -4.83734600 | -4.26548500 | -1.08332100 |
| C | -3.89879000 | -3.25756700 | -1.30970700 |
| C | -4.14068600 | -1.95094700 | -0.87118800 |
| C | -5.33551400 | -1.66975200 | -0.19333500 |
| C | -6.26899700 | -2.67785000 | 0.04015100  |
| C | -6.02331700 | -3.97775500 | -0.40794200 |
| H | -4.63771900 | -5.27488600 | -1.43016300 |
| H | -2.97036500 | -3.48595800 | -1.82490300 |
| H | -5.52437600 | -0.66058600 | 0.16198200  |
| H | -7.18978000 | -2.44830200 | 0.56819500  |
| H | -6.75275200 | -4.76214200 | -0.22895100 |

|   |             |             |             |
|---|-------------|-------------|-------------|
| C | -3.13631700 | -0.85547000 | -1.14304800 |
| H | -3.60891500 | -0.00952600 | -1.64334400 |
| H | -2.31194800 | -1.21790000 | -1.75962600 |
| N | -2.54220200 | -0.32239000 | 0.14009800  |
| H | -3.35622000 | 0.20360400  | 0.68994800  |
| H | -2.13753200 | -1.14366900 | 0.60799600  |
| O | -4.06810300 | 1.45444400  | 1.05531400  |
| H | -4.96834300 | 1.63355100  | 0.75441100  |
| H | -3.27763200 | 1.89180000  | 0.21540500  |

**Int2W**

|   |             |             |             |
|---|-------------|-------------|-------------|
| C | 6.67012200  | 0.43724600  | -0.75522100 |
| C | 5.37889900  | -0.08452200 | -0.82239500 |
| C | 5.12558000  | -1.40978500 | -0.44063900 |
| C | 6.19180200  | -2.19855000 | 0.00522300  |
| C | 7.48657100  | -1.68056100 | 0.06384700  |
| C | 7.72849700  | -0.36026900 | -0.31499400 |
| H | 6.85033200  | 1.46717000  | -1.04921300 |
| H | 4.56163600  | 0.54366500  | -1.16642100 |
| H | 6.00621800  | -3.22564300 | 0.30857300  |
| H | 8.30287300  | -2.30696300 | 0.41150400  |
| H | 8.73428400  | 0.04643600  | -0.26557500 |
| C | 3.73422000  | -1.99572300 | -0.53534100 |
| H | 3.71577300  | -3.01941900 | -0.14373000 |
| H | 3.40292800  | -2.06848600 | -1.57912300 |
| N | 2.75741000  | -1.18513700 | 0.19057200  |
| H | 3.08879800  | -0.43609100 | 0.80237500  |
| C | 1.45625900  | -1.46240100 | 0.24875900  |
| S | 0.74361500  | -2.77792100 | -0.52898300 |
| C | 0.58223200  | -0.48230700 | 1.04334800  |
| C | 1.24023400  | 0.12861200  | 2.29406500  |
| O | 2.41869100  | 0.45342000  | 2.32265600  |
| C | 0.35307900  | 0.29006500  | 3.50530800  |
| H | -0.69740200 | 0.44242600  | 3.24205000  |
| H | 0.39998700  | -0.64916300 | 4.07394800  |
| H | 0.73933400  | 1.08693200  | 4.14359100  |
| H | -0.27601100 | -1.05257200 | 1.40121000  |
| C | 0.04194200  | 0.63377300  | 0.11610600  |
| C | 0.93061500  | 1.80951300  | -0.15517500 |

|   |             |             |             |
|---|-------------|-------------|-------------|
| C | 0.97503900  | 2.91680600  | 0.70623700  |
| C | 1.74644500  | 1.82889100  | -1.29981300 |
| C | 1.80441900  | 4.00554900  | 0.43586400  |
| H | 0.34309300  | 2.92996600  | 1.58954500  |
| C | 2.57471400  | 2.91843600  | -1.57467400 |
| H | 1.71332000  | 0.98524200  | -1.98315100 |
| C | 2.60852100  | 4.00922100  | -0.70435300 |
| H | 1.81795500  | 4.85312000  | 1.11487400  |
| H | 3.18698300  | 2.91756300  | -2.47232900 |
| H | 3.25196900  | 4.85809400  | -0.91630600 |
| C | -1.16460300 | 0.49718500  | -0.50147800 |
| C | -1.74848400 | 1.60551000  | -1.35590100 |
| H | -0.96836900 | 2.35091800  | -1.52620800 |
| C | -2.97662200 | 2.31432300  | -0.79063500 |
| C | -3.20100900 | 2.43777200  | 0.58574500  |
| C | -3.88859600 | 2.91085800  | -1.67358600 |
| C | -4.30809300 | 3.14071300  | 1.06523400  |
| H | -2.52168100 | 1.97077400  | 1.29050200  |
| C | -4.99025900 | 3.61976200  | -1.19617900 |
| H | -3.73080300 | 2.82053900  | -2.74598700 |
| C | -5.20420900 | 3.73722100  | 0.17848100  |
| H | -4.46921800 | 3.21406400  | 2.13678300  |
| H | -5.68373500 | 4.07483700  | -1.89776700 |
| H | -6.06506900 | 4.28309600  | 0.55336400  |
| C | -4.39948500 | -4.52493400 | -1.04731600 |
| C | -3.70596300 | -3.38642500 | -1.46349200 |
| C | -3.84071400 | -2.17621000 | -0.77557100 |
| C | -4.68398400 | -2.12433700 | 0.34429700  |
| C | -5.37652400 | -3.26012100 | 0.76180500  |
| C | -5.23725600 | -4.46358900 | 0.06560900  |
| H | -4.28369300 | -5.45692700 | -1.59278300 |
| H | -3.05277700 | -3.43840000 | -2.33076400 |
| H | -4.78475700 | -1.19355600 | 0.89602100  |
| H | -6.03127300 | -3.20521400 | 1.62702600  |
| H | -5.78006400 | -5.34686200 | 0.38944400  |
| C | -3.09016600 | -0.94167300 | -1.23050500 |
| H | -3.76131000 | -0.08008800 | -1.21817600 |
| H | -2.75249700 | -1.08491100 | -2.26719100 |
| N | -1.95338400 | -0.66374800 | -0.32919700 |

|   |             |             |             |
|---|-------------|-------------|-------------|
| H | -2.57581100 | -0.47754100 | 1.50424000  |
| H | -1.36282300 | -1.49763800 | -0.26796200 |
| O | -2.76598800 | -0.33364500 | 2.45562000  |
| H | -2.94340600 | -1.22003400 | 2.79469700  |
| H | -2.00177700 | 1.20508500  | -2.34513800 |

**Int3-1W**

|   |             |             |             |
|---|-------------|-------------|-------------|
| C | 6.68655200  | 0.78906900  | 0.20444200  |
| C | 5.52291600  | 0.19542600  | -0.28249600 |
| C | 5.28585700  | -1.17232000 | -0.08305100 |
| C | 6.23684000  | -1.93021500 | 0.60853800  |
| C | 7.40590100  | -1.33832200 | 1.08996500  |
| C | 7.63222800  | 0.02334700  | 0.89011900  |
| H | 6.85690300  | 1.84990800  | 0.04518000  |
| H | 4.79288200  | 0.79547700  | -0.81935500 |
| H | 6.06097800  | -2.99057700 | 0.77004300  |
| H | 8.13573100  | -1.94034600 | 1.62339600  |
| H | 8.53997600  | 0.48634700  | 1.26599000  |
| C | 4.02751600  | -1.81844200 | -0.61741500 |
| H | 4.04870200  | -2.90456700 | -0.47253500 |
| H | 3.92508800  | -1.65682900 | -1.69728400 |
| N | 2.83615500  | -1.27245800 | 0.03382200  |
| H | 2.95223900  | -0.63797500 | 0.82687400  |
| C | 1.58973200  | -1.62071900 | -0.26620000 |
| S | 1.20712600  | -2.75438800 | -1.45958800 |
| C | 0.47847500  | -0.90247200 | 0.50322600  |
| C | 0.79347100  | -0.47655100 | 1.94323300  |
| O | 1.90019800  | -0.10172900 | 2.30942700  |
| C | -0.37996600 | -0.51881400 | 2.89761000  |
| H | -0.56449900 | -1.56460200 | 3.17428400  |
| H | -0.15063000 | 0.05248100  | 3.79850400  |
| H | -1.29525700 | -0.15282200 | 2.42289700  |
| H | -0.33827300 | -1.61621700 | 0.57136300  |
| C | -0.01506600 | 0.36166600  | -0.23396500 |
| C | 1.02740500  | 1.37361500  | -0.60647300 |
| C | 1.47274700  | 2.35910700  | 0.28991800  |
| C | 1.59719300  | 1.34680800  | -1.89263500 |
| C | 2.44240600  | 3.29017600  | -0.08639100 |
| H | 1.05473300  | 2.40020200  | 1.29027900  |

|   |             |             |             |
|---|-------------|-------------|-------------|
| C | 2.56324900  | 2.27903800  | -2.27337700 |
| H | 1.26909000  | 0.58485700  | -2.59352100 |
| C | 2.98916100  | 3.25552900  | -1.36973600 |
| H | 2.76512900  | 4.04642600  | 0.62341000  |
| H | 2.97967100  | 2.24500700  | -3.27635400 |
| H | 3.73733400  | 3.98556100  | -1.66532900 |
| C | -1.33141900 | 0.52886500  | -0.56638500 |
| C | -1.80730800 | 1.81071700  | -1.23118700 |
| H | -0.93250200 | 2.40122300  | -1.51033100 |
| C | -2.72778400 | 2.67420500  | -0.37653900 |
| C | -2.49728100 | 2.85170800  | 0.99392500  |
| C | -3.79992400 | 3.35771700  | -0.96503900 |
| C | -3.31438000 | 3.68905000  | 1.75321500  |
| H | -1.67025100 | 2.32889400  | 1.46475400  |
| C | -4.61833000 | 4.19851600  | -0.20895700 |
| H | -3.99343000 | 3.23230900  | -2.02794200 |
| C | -4.37854200 | 4.36644300  | 1.15496400  |
| H | -3.11931500 | 3.81280700  | 2.81485100  |
| H | -5.44425200 | 4.71837800  | -0.68615200 |
| H | -5.01552900 | 5.01706900  | 1.74690000  |
| C | -5.70621200 | -3.61447400 | -0.75345700 |
| C | -4.87163100 | -2.61625300 | -1.26545600 |
| C | -4.48638900 | -1.52927400 | -0.47187500 |
| C | -4.94986000 | -1.45995400 | 0.84893600  |
| C | -5.78204600 | -2.45313000 | 1.36146000  |
| C | -6.16247100 | -3.53437200 | 0.56178400  |
| H | -5.99834800 | -4.45008800 | -1.38300900 |
| H | -4.52366700 | -2.67674400 | -2.29419000 |
| H | -4.64696000 | -0.62339400 | 1.47199000  |
| H | -6.13524600 | -2.38560600 | 2.38641700  |
| H | -6.81014400 | -4.30839400 | 0.96275200  |
| C | -3.58177200 | -0.44680800 | -1.02402400 |
| H | -4.08886600 | 0.52006600  | -0.94700200 |
| H | -3.40929700 | -0.63747300 | -2.09560300 |
| N | -2.32742700 | -0.39323200 | -0.26500000 |
| H | -0.93597800 | -3.38009300 | -0.55467500 |
| H | -2.00614600 | -1.33700700 | -0.04873100 |
| O | -1.67260200 | -3.31667400 | 0.08704100  |
| H | -2.46370700 | -3.62055500 | -0.37774200 |

|   |             |            |             |
|---|-------------|------------|-------------|
| H | -2.31965600 | 1.57024700 | -2.17030700 |
|---|-------------|------------|-------------|

**TS3-1W**

|   |             |             |             |
|---|-------------|-------------|-------------|
| C | -6.19759700 | -1.08349100 | 1.22842600  |
| C | -5.35332400 | -2.04363400 | 0.66256500  |
| C | -4.34262100 | -1.67169100 | -0.22882000 |
| C | -4.19566300 | -0.30832300 | -0.55182200 |
| C | -5.03162200 | 0.65287400  | 0.02240100  |
| C | -6.03432300 | 0.26560400  | 0.91766500  |
| H | -6.97822300 | -1.39247000 | 1.91759800  |
| H | -5.48069600 | -3.09224700 | 0.91979200  |
| H | -3.44063300 | -0.01663600 | -1.27814600 |
| H | -4.90337400 | 1.69955700  | -0.23812200 |
| H | -6.68682600 | 1.01135600  | 1.36170200  |
| C | -3.36600500 | -2.69411100 | -0.78685300 |
| H | -3.22116100 | -2.56179600 | -1.86070900 |
| H | -3.73331600 | -3.70907000 | -0.60464500 |
| N | -2.06176900 | -2.55119900 | -0.14443900 |
| H | -2.01209100 | -2.76780900 | 0.85096600  |
| C | -1.00330600 | -1.86536700 | -0.63483500 |
| S | -0.95598000 | -1.36811900 | -2.26361500 |
| C | 0.07928100  | -1.51205300 | 0.32578500  |
| C | 0.05296300  | -2.02624400 | 1.68532900  |
| O | -1.04108500 | -2.25646800 | 2.29743400  |
| C | 1.31553200  | -2.17281800 | 2.50538100  |
| H | 1.95770700  | -1.29357900 | 2.41763100  |
| H | 1.03221000  | -2.33224800 | 3.54654100  |
| H | 1.90198600  | -3.02494300 | 2.14923300  |
| H | -0.80772500 | -0.28785500 | 0.87007900  |
| C | 1.41972100  | -1.05742100 | -0.21458400 |
| C | 2.47889400  | -2.09944500 | -0.36956100 |
| C | 3.80087800  | -1.92880500 | 0.08397700  |
| C | 2.14980200  | -3.33684400 | -0.95675500 |
| C | 4.75474200  | -2.93653900 | -0.06552700 |
| H | 4.08151800  | -1.00864700 | 0.58653900  |
| C | 3.10161300  | -4.34387200 | -1.10408400 |
| H | 1.14087500  | -3.49644800 | -1.32174500 |
| C | 4.41183400  | -4.14984100 | -0.66156100 |
| H | 5.76527700  | -2.77381400 | 0.29930900  |

|   |             |             |             |
|---|-------------|-------------|-------------|
| H | 2.81869700  | -5.28290900 | -1.57193600 |
| H | 5.15273900  | -4.93604000 | -0.77412200 |
| C | 1.58934200  | 0.24500400  | -0.58329200 |
| C | 2.88503100  | 0.81517400  | -1.12154500 |
| H | 3.52295100  | -0.01289400 | -1.44354200 |
| C | 3.69338000  | 1.70315600  | -0.17945100 |
| C | 3.48824400  | 1.71725200  | 1.20576800  |
| C | 4.70786100  | 2.51585700  | -0.70746600 |
| C | 4.27577600  | 2.51526700  | 2.04014700  |
| H | 2.69762900  | 1.10582200  | 1.63076000  |
| C | 5.49756600  | 3.30998100  | 0.12165200  |
| H | 4.87968700  | 2.52178100  | -1.78138600 |
| C | 5.28462200  | 3.31270000  | 1.50250500  |
| H | 4.09666900  | 2.51204500  | 3.11177500  |
| H | 6.27793100  | 3.93041200  | -0.31009600 |
| H | 5.89706400  | 3.93340700  | 2.14984100  |
| C | -2.74518700 | 4.33407500  | -1.52182000 |
| C | -1.50382500 | 3.72150200  | -1.71354900 |
| C | -0.78804800 | 3.19725900  | -0.63220300 |
| C | -1.34401400 | 3.29290900  | 0.65211200  |
| C | -2.58140000 | 3.90406200  | 0.84853300  |
| C | -3.28630300 | 4.42872800  | -0.23973500 |
| H | -3.28521600 | 4.73814900  | -2.37324800 |
| H | -1.08591700 | 3.65034300  | -2.71454300 |
| H | -0.80058800 | 2.88071500  | 1.49710700  |
| H | -2.99335700 | 3.98014600  | 1.85101500  |
| H | -4.24597100 | 4.91419600  | -0.08610600 |
| C | 0.55673700  | 2.52812800  | -0.83985300 |
| H | 1.29221100  | 2.96002100  | -0.15442500 |
| H | 0.90573000  | 2.74946300  | -1.86104100 |
| N | 0.45209300  | 1.09145400  | -0.57054300 |
| H | -1.79966200 | -0.79368900 | 2.00763800  |
| H | -0.27032700 | 0.67058300  | -1.16075800 |
| O | -1.69842800 | 0.08729600  | 1.51933600  |
| H | -2.48492000 | 0.22333100  | 0.95234800  |
| H | 2.66513500  | 1.38905900  | -2.03032700 |

Int3W

|   |            |            |             |
|---|------------|------------|-------------|
| C | 7.00664000 | 0.67568000 | -0.39732200 |
|---|------------|------------|-------------|

|   |             |             |             |
|---|-------------|-------------|-------------|
| C | 5.83767800  | 0.25683100  | -1.03496500 |
| C | 5.01212000  | -0.70918400 | -0.44936400 |
| C | 5.37305000  | -1.24931300 | 0.79424800  |
| C | 6.53783800  | -0.82568600 | 1.43375600  |
| C | 7.35907800  | 0.13501300  | 0.83923200  |
| H | 7.63920900  | 1.42397300  | -0.86607300 |
| H | 5.56284700  | 0.68286700  | -1.99631500 |
| H | 4.73711900  | -1.99635200 | 1.26356600  |
| H | 6.80876600  | -1.25148400 | 2.39578000  |
| H | 8.26855500  | 0.45895700  | 1.33693500  |
| C | 3.75609800  | -1.17435200 | -1.15135900 |
| H | 3.73218400  | -2.26655000 | -1.24572500 |
| H | 3.70541700  | -0.77693900 | -2.17093400 |
| N | 2.55656000  | -0.75609100 | -0.42322600 |
| H | 2.67353600  | -0.20029100 | 0.42109700  |
| C | 1.32050200  | -1.14765400 | -0.72252200 |
| S | 0.95863600  | -2.17949800 | -2.00320200 |
| C | 0.19305100  | -0.57976400 | 0.14369800  |
| C | 0.49117300  | -0.43369100 | 1.64073900  |
| O | 1.61410700  | -0.18151800 | 2.08030800  |
| C | -0.68034100 | -0.63270600 | 2.56325500  |
| H | -1.60395800 | -0.24420300 | 2.12815300  |
| H | -0.80580000 | -1.71787000 | 2.66300200  |
| H | -0.47376900 | -0.19199300 | 3.54014400  |
| H | -0.62356900 | -1.29090700 | 0.08472600  |
| C | -0.33466800 | 0.77089800  | -0.38587700 |
| C | 0.67259600  | 1.82516800  | -0.72177300 |
| C | 1.29173600  | 2.59885300  | 0.27394400  |
| C | 1.03476900  | 2.04811800  | -2.06081300 |
| C | 2.23744100  | 3.56941500  | -0.06050200 |
| H | 1.03298200  | 2.44064900  | 1.31614900  |
| C | 1.97758100  | 3.02050100  | -2.39505100 |
| H | 0.57263200  | 1.44635900  | -2.83749800 |
| C | 2.58243800  | 3.78417200  | -1.39541500 |
| H | 2.70188800  | 4.15980400  | 0.72403700  |
| H | 2.23962300  | 3.18008700  | -3.43715300 |
| H | 3.31672200  | 4.54132700  | -1.65442700 |
| C | -1.66578100 | 0.95955500  | -0.55513800 |
| C | -2.26711100 | 2.29429400  | -0.97749500 |



|   |             |             |             |
|---|-------------|-------------|-------------|
| H | -2.79268400 | 2.15054600  | -1.93091100 |
| C | -3.24754800 | 2.84611800  | 0.04597700  |
| C | -2.78031200 | 3.39929500  | 1.24764300  |
| C | -4.62951700 | 2.80238200  | -0.17560100 |
| C | -3.67020700 | 3.89738200  | 2.19713400  |
| H | -1.70995600 | 3.44292500  | 1.43158600  |
| C | -5.52503800 | 3.29753300  | 0.77620600  |
| H | -5.00852500 | 2.38984500  | -1.10773100 |
| C | -5.04743700 | 3.84607000  | 1.96523500  |
| H | -3.29015800 | 4.32800900  | 3.11922100  |
| H | -6.59330700 | 3.25663200  | 0.58408300  |
| H | -5.74068700 | 4.23400800  | 2.70564900  |
| C | -4.28856000 | -4.09454700 | 0.41802900  |
| C | -3.39190200 | -3.11669600 | -0.00873100 |
| C | -3.78923100 | -2.14406200 | -0.93848800 |
| C | -5.10028000 | -2.17505100 | -1.42584600 |
| C | -6.00106800 | -3.15387400 | -0.99941200 |
| C | -5.59619200 | -4.11561000 | -0.07493100 |
| H | -3.96431700 | -4.84545900 | 1.13277500  |
| H | -2.37619900 | -3.11599600 | 0.37778700  |
| H | -5.41724200 | -1.42963800 | -2.15187600 |
| H | -7.01434800 | -3.16465500 | -1.39102400 |
| H | -6.29235800 | -4.88033700 | 0.25758400  |
| C | -2.82398600 | -1.07033300 | -1.39117400 |
| H | -3.21115000 | -0.59116300 | -2.30507000 |
| H | -1.85716300 | -1.51093200 | -1.65257200 |
| N | -2.60524700 | -0.08116700 | -0.30520300 |
| H | -3.50259200 | 0.31883300  | -0.04302000 |
| H | -1.47296200 | 3.02165400  | -1.15594000 |
| O | 2.78285500  | -2.78316300 | 2.54573200  |
| H | 2.85706700  | -3.06695000 | 3.46562400  |
| H | 2.53269600  | -1.84378200 | 2.58741100  |
| O | 0.30785700  | -3.50370100 | 1.30046900  |
| H | 1.19831700  | -3.44749900 | 1.69565700  |
| H | 0.46761200  | -3.59217300 | 0.34953300  |

**TS3W**

|   |            |             |            |
|---|------------|-------------|------------|
| C | 7.53987900 | -0.05413500 | 0.94386100 |
|---|------------|-------------|------------|

|   |             |             |             |
|---|-------------|-------------|-------------|
| C | 6.48984500  | 0.21813300  | 0.06506100  |
| C | 5.41087700  | -0.66442800 | -0.05391700 |
| C | 5.39777500  | -1.82902700 | 0.72830500  |
| C | 6.44326000  | -2.09870900 | 1.61041300  |
| C | 7.51798900  | -1.21306300 | 1.71945500  |
| H | 8.37163700  | 0.63987300  | 1.02313600  |
| H | 6.50816600  | 1.12342100  | -0.53625500 |
| H | 4.56345500  | -2.52118800 | 0.64511600  |
| H | 6.42254900  | -3.00401900 | 2.21046500  |
| H | 8.33337000  | -1.42661400 | 2.40444600  |
| C | 4.28164000  | -0.37645100 | -1.01785700 |
| H | 4.11992100  | -1.21235100 | -1.70835100 |
| H | 4.51527900  | 0.49344700  | -1.64171000 |
| N | 3.02737600  | -0.13582400 | -0.30232400 |
| H | 3.06242300  | -0.09293400 | 0.71355200  |
| C | 1.81119600  | -0.14283100 | -0.85260400 |
| S | 1.60643200  | -0.43069300 | -2.52845500 |
| C | 0.62261500  | 0.03229800  | 0.03898500  |
| C | 0.75474000  | -0.17571800 | 1.46392900  |
| O | 1.71604700  | -0.82247300 | 1.98174900  |
| C | -0.33716400 | 0.27709400  | 2.41308300  |
| H | -0.65331500 | 1.30648700  | 2.23270300  |
| H | -1.22255600 | -0.35271500 | 2.27457100  |
| H | 0.02718600  | 0.16370500  | 3.43511400  |
| H | 0.09527400  | -1.42391700 | -0.27246400 |
| C | -0.39450200 | 1.03017500  | -0.46588800 |
| C | 0.17376900  | 2.35264400  | -0.89068800 |
| C | 0.95888300  | 3.10591500  | -0.00242300 |
| C | -0.02860900 | 2.85760900  | -2.18502100 |
| C | 1.49297400  | 4.33739400  | -0.38192900 |
| H | 1.15078800  | 2.72529500  | 0.99690800  |
| C | 0.50974700  | 4.08560400  | -2.56863000 |
| H | -0.59412700 | 2.26457300  | -2.89632100 |
| C | 1.26884900  | 4.83342200  | -1.66718600 |
| H | 2.08677900  | 4.90794600  | 0.32683500  |
| H | 0.34511700  | 4.45254000  | -3.57777200 |
| H | 1.68976900  | 5.78897800  | -1.96620500 |
| C | -1.73080100 | 0.80907300  | -0.46758000 |
| C | -2.77860900 | 1.89171600  | -0.71876500 |

|   |             |             |             |
|---|-------------|-------------|-------------|
| H | -3.44820700 | 1.57111800  | -1.52702500 |
| C | -3.61006800 | 2.17963800  | 0.52258400  |
| C | -3.11686100 | 3.03480600  | 1.51986700  |
| C | -4.86577300 | 1.58837900  | 0.71413800  |
| C | -3.85675300 | 3.28978400  | 2.67339700  |
| H | -2.14824700 | 3.50826400  | 1.38060700  |
| C | -5.60819100 | 1.83818600  | 1.87150300  |
| H | -5.27440200 | 0.93729600  | -0.05528300 |
| C | -5.10534700 | 2.68915100  | 2.85466400  |
| H | -3.46120200 | 3.96081500  | 3.43071700  |
| H | -6.58072200 | 1.37130700  | 1.99916000  |
| H | -5.68232000 | 2.88817400  | 3.75298400  |
| C | -3.86725200 | -4.42279200 | 0.48207700  |
| C | -3.13643500 | -3.28744900 | 0.13269400  |
| C | -3.56409200 | -2.45629400 | -0.91206800 |
| C | -4.74106500 | -2.79044100 | -1.59335100 |
| C | -5.46973500 | -3.93062100 | -1.25119100 |
| C | -5.03515300 | -4.75042500 | -0.20960900 |
| H | -3.52367700 | -5.05521100 | 1.29619400  |
| H | -2.22800700 | -3.03391000 | 0.66751300  |
| H | -5.08968900 | -2.15128900 | -2.40114000 |
| H | -6.37965800 | -4.17262000 | -1.79303700 |
| H | -5.60285500 | -5.63524700 | 0.06353400  |
| C | -2.77277700 | -1.23019500 | -1.31925100 |
| H | -3.40677800 | -0.60479100 | -1.96859000 |
| H | -1.90923500 | -1.52046900 | -1.92782100 |
| N | -2.26164300 | -0.49126100 | -0.14281700 |
| H | -3.04308700 | -0.37067200 | 0.50183300  |
| H | -2.29966600 | 2.81208900  | -1.05239500 |
| O | 2.03113900  | -3.18534900 | 0.86186800  |
| H | 1.84634600  | -3.84624800 | 1.54160400  |
| H | 2.05364500  | -2.30322600 | 1.33749000  |
| O | 0.12427400  | -2.48193100 | -0.69476900 |
| H | 0.86880100  | -2.91512600 | -0.13255000 |
| H | 0.52342700  | -2.24473700 | -1.57344000 |

**Int4W**

|   |            |             |             |
|---|------------|-------------|-------------|
| C | 7.59636800 | -0.09880000 | 0.85111400  |
| C | 6.53397600 | 0.12064000  | -0.02775400 |

|   |             |             |             |
|---|-------------|-------------|-------------|
| C | 5.46183400  | -0.77646300 | -0.08810800 |
| C | 5.46673000  | -1.90138000 | 0.75034700  |
| C | 6.52601300  | -2.11828600 | 1.63072400  |
| C | 7.59349500  | -1.21863900 | 1.68280500  |
| H | 8.42382100  | 0.60401400  | 0.88496700  |
| H | 6.53836900  | 0.99361200  | -0.67562200 |
| H | 4.63485900  | -2.59995600 | 0.70709700  |
| H | 6.52204300  | -2.99362100 | 2.27407900  |
| H | 8.41950500  | -1.39166300 | 2.36658300  |
| C | 4.31046300  | -0.54473100 | -1.04056400 |
| H | 4.07142900  | -1.45085900 | -1.60705300 |
| H | 4.56071600  | 0.22594200  | -1.77885900 |
| N | 3.10546100  | -0.14322800 | -0.31167100 |
| H | 3.21889500  | 0.08380300  | 0.66905900  |
| C | 1.86310700  | -0.14295800 | -0.81640900 |
| S | 1.56968600  | -0.53092600 | -2.43996400 |
| C | 0.75991900  | 0.23534400  | 0.10890800  |
| C | 0.76749100  | -0.06594000 | 1.44475800  |
| O | 1.70843800  | -0.82711100 | 2.05595200  |
| C | -0.24088300 | 0.41384100  | 2.44981700  |
| H | -0.87927100 | 1.21254000  | 2.07855000  |
| H | -0.87317900 | -0.42457500 | 2.76655700  |
| H | 0.29594400  | 0.75366500  | 3.34181800  |
| H | -0.59105400 | -2.06030900 | -0.26432600 |
| C | -0.32584000 | 1.09038800  | -0.46466800 |
| C | 0.13327400  | 2.44948300  | -0.90255700 |
| C | 0.83582600  | 3.28626000  | -0.02066200 |
| C | -0.08098400 | 2.89826400  | -2.21597200 |
| C | 1.27402700  | 4.54749300  | -0.42512600 |
| H | 1.03722400  | 2.94449300  | 0.99033000  |
| C | 0.36338200  | 4.15546400  | -2.62374100 |
| H | -0.57913800 | 2.23989700  | -2.92023900 |
| C | 1.03755000  | 4.98768100  | -1.72832000 |
| H | 1.80465000  | 5.18412100  | 0.27733300  |
| H | 0.19291800  | 4.48010700  | -3.64624300 |
| H | 1.38494000  | 5.96628100  | -2.04654100 |
| C | -1.62721700 | 0.71986000  | -0.52722900 |
| C | -2.76547900 | 1.71849500  | -0.74364900 |
| H | -3.48220800 | 1.33648100  | -1.47828000 |

|   |             |             |             |
|---|-------------|-------------|-------------|
| C | -3.49901100 | 2.01362300  | 0.55887200  |
| C | -3.04318300 | 3.03307300  | 1.40911500  |
| C | -4.62259900 | 1.27388800  | 0.95149400  |
| C | -3.69027200 | 3.30245700  | 2.61467800  |
| H | -2.17692500 | 3.62096000  | 1.11691100  |
| C | -5.27006000 | 1.53861100  | 2.16097100  |
| H | -5.00499300 | 0.48948300  | 0.30382500  |
| C | -4.80587800 | 2.55358300  | 2.99660000  |
| H | -3.32582700 | 4.10093500  | 3.25488200  |
| H | -6.14067400 | 0.95398100  | 2.44441600  |
| H | -5.31080600 | 2.76400400  | 3.93478500  |
| C | -4.07855200 | -4.62666800 | -0.16205700 |
| C | -3.18566600 | -3.63532600 | -0.56963700 |
| C | -3.65932000 | -2.39173800 | -1.01397000 |
| C | -5.04383100 | -2.17571900 | -1.05180000 |
| C | -5.93798700 | -3.16771800 | -0.64579800 |
| C | -5.45549800 | -4.39649200 | -0.19537900 |
| H | -3.69747400 | -5.58653800 | 0.17533300  |
| H | -2.11624500 | -3.82196800 | -0.56037000 |
| H | -5.42700000 | -1.22693400 | -1.42090200 |
| H | -7.00746300 | -2.98222700 | -0.68787100 |
| H | -6.14731000 | -5.17246100 | 0.11945600  |
| C | -2.70962700 | -1.29288700 | -1.44300400 |
| H | -3.27281800 | -0.55836300 | -2.03103500 |
| H | -1.92798000 | -1.68713600 | -2.09762100 |
| N | -2.02907600 | -0.65254700 | -0.26799200 |
| H | -2.69419400 | -0.65851600 | 0.50650400  |
| H | -2.37252500 | 2.65097400  | -1.14738700 |
| O | 2.16584100  | -3.10866600 | 0.82646300  |
| H | 2.00108100  | -3.76801700 | 1.51263300  |
| H | 1.98616300  | -1.62178900 | 1.51184700  |
| O | -0.03727500 | -2.78639200 | -0.63675200 |
| H | 1.34497300  | -3.10511800 | 0.25944600  |
| H | 0.35443400  | -2.36088000 | -1.42510600 |

**TS4W**

|   |             |             |             |
|---|-------------|-------------|-------------|
| C | -7.53503600 | -0.94425700 | -1.03597100 |
| C | -6.60354300 | -0.12437700 | -0.39508100 |
| C | -5.48735800 | -0.67311200 | 0.24714300  |

|   |             |             |             |
|---|-------------|-------------|-------------|
| C | -5.32431400 | -2.06591300 | 0.23620600  |
| C | -6.25061300 | -2.88789900 | -0.40311100 |
| C | -7.35952400 | -2.32777800 | -1.04262900 |
| H | -8.39745500 | -0.50170200 | -1.52626000 |
| H | -6.74672500 | 0.95345600  | -0.38634800 |
| H | -4.46683400 | -2.50662700 | 0.73905700  |
| H | -6.11112600 | -3.96511400 | -0.39912100 |
| H | -8.08361300 | -2.96764900 | -1.53852000 |
| C | -4.47023400 | 0.21964700  | 0.92331800  |
| H | -4.17408700 | -0.18040900 | 1.89597200  |
| H | -4.88856700 | 1.21432100  | 1.11364300  |
| N | -3.25486500 | 0.31179700  | 0.09213500  |
| H | -3.50725400 | 0.56987100  | -0.85972800 |
| C | -2.12888100 | 1.09579800  | 0.54389200  |
| S | -2.20359800 | 1.92684900  | 2.01477300  |
| C | -1.00930500 | 1.02725400  | -0.31350800 |
| C | -0.70261500 | -0.15991600 | -1.11491900 |
| O | -1.50815000 | -1.23869600 | -1.05634000 |
| C | -0.08865300 | -0.03838700 | -2.49576700 |
| H | 0.67889600  | 0.73279100  | -2.53528500 |
| H | 0.32855100  | -0.99365600 | -2.82316400 |
| H | -0.89406200 | 0.23528400  | -3.18526900 |
| H | 3.05686700  | -2.74362300 | -1.20847400 |
| C | 0.25961100  | 1.70323300  | 0.03130100  |
| C | 0.35470700  | 3.17399600  | 0.19271200  |
| C | -0.23690600 | 4.00475300  | -0.77253500 |
| C | 1.03765900  | 3.77513500  | 1.26178000  |
| C | -0.12191400 | 5.39066500  | -0.68961600 |
| H | -0.79266900 | 3.54871100  | -1.58616200 |
| C | 1.14943500  | 5.16191800  | 1.34724600  |
| H | 1.44100900  | 3.15125500  | 2.05254800  |
| C | 0.57660200  | 5.97541500  | 0.36841600  |
| H | -0.58283000 | 6.01581000  | -1.44924900 |
| H | 1.67122900  | 5.60804400  | 2.18909400  |
| H | 0.66110100  | 7.05604900  | 0.43745400  |
| C | 1.31425600  | 0.84802500  | 0.11680100  |
| C | 2.77181400  | 1.16168400  | 0.36137200  |
| H | 3.07886200  | 0.79769700  | 1.34902500  |
| C | 3.72699700  | 0.59038200  | -0.67679900 |

|   |             |             |             |
|---|-------------|-------------|-------------|
| C | 3.66596000  | 1.01484900  | -2.01223600 |
| C | 4.68428600  | -0.37046900 | -0.32497400 |
| C | 4.52646900  | 0.48263200  | -2.97382000 |
| H | 2.94128300  | 1.77377000  | -2.29549300 |
| C | 5.55479500  | -0.90005400 | -1.28173800 |
| H | 4.74489800  | -0.70941500 | 0.70567000  |
| C | 5.47413000  | -0.48147100 | -2.61226300 |
| H | 4.46650900  | 0.82674000  | -4.00241300 |
| H | 6.29495400  | -1.63893000 | -0.98759800 |
| H | 6.14996400  | -0.89030100 | -3.35758300 |
| C | 3.27731500  | -3.98978600 | 1.74339600  |
| C | 2.16978400  | -3.33089300 | 1.20493900  |
| C | 1.77517500  | -2.07927800 | 1.70651200  |
| C | 2.48472700  | -1.52562200 | 2.77991500  |
| C | 3.58974300  | -2.18721900 | 3.31988600  |
| C | 3.99509800  | -3.41637900 | 2.79587400  |
| H | 3.56670300  | -4.96243800 | 1.35498800  |
| H | 1.57787200  | -3.78938200 | 0.41407400  |
| H | 2.15989600  | -0.57964000 | 3.20553700  |
| H | 4.12563800  | -1.74843100 | 4.15665900  |
| H | 4.85124700  | -3.93360200 | 3.21900600  |
| C | 0.59035700  | -1.36478200 | 1.09313000  |
| H | 0.10654300  | -0.69520000 | 1.80756600  |
| H | -0.14376200 | -2.10107100 | 0.75422800  |
| N | 0.92006600  | -0.54396300 | -0.11326400 |
| H | 1.55779800  | -1.05583500 | -0.73339600 |
| H | 2.87782800  | 2.25015900  | 0.38538000  |
| O | 0.07471900  | -3.79153400 | -1.44229200 |
| H | -0.58840500 | -3.08455600 | -1.42272500 |
| H | -2.26752600 | -1.00183200 | -0.43960500 |
| O | 2.55038400  | -2.36747900 | -1.94251500 |
| H | 0.81825300  | -3.40982500 | -1.93321600 |
| H | 3.19441600  | -1.84423700 | -2.44280900 |

**Int5W**

|   |            |             |             |
|---|------------|-------------|-------------|
| C | 7.37024900 | -1.28376300 | 1.22939500  |
| C | 6.53712800 | -0.30656400 | 0.67991100  |
| C | 5.48556900 | -0.65747900 | -0.17487400 |
| C | 5.28691600 | -2.01415400 | -0.47050200 |

|   |             |             |             |
|---|-------------|-------------|-------------|
| C | 6.11488200  | -2.99283900 | 0.07626500  |
| C | 7.15996000  | -2.62946000 | 0.92973000  |
| H | 8.18366500  | -0.99242500 | 1.88788600  |
| H | 6.70763200  | 0.74224700  | 0.91054600  |
| H | 4.47942400  | -2.30147500 | -1.13958600 |
| H | 5.94862300  | -4.03866800 | -0.16586600 |
| H | 7.80755100  | -3.39139100 | 1.35380600  |
| C | 4.57538400  | 0.40380700  | -0.75334400 |
| H | 4.39863800  | 0.23654600  | -1.81900900 |
| H | 5.02748800  | 1.39745400  | -0.66831300 |
| N | 3.26341600  | 0.35966400  | -0.07726800 |
| H | 3.40736600  | 0.42406200  | 0.92964600  |
| C | 2.22175800  | 1.29758000  | -0.48667100 |
| S | 2.58263700  | 2.55568600  | -1.56226100 |
| C | 0.97130700  | 0.97418300  | 0.05177700  |
| C | 0.60817300  | -0.38952600 | 0.62558100  |
| O | 1.42599000  | -1.45111300 | 0.27049200  |
| C | 0.38363100  | -0.40979800 | 2.14390800  |
| H | -0.32719600 | 0.35355700  | 2.46320600  |
| H | 0.03896200  | -1.39431700 | 2.47355800  |
| H | 1.34557900  | -0.20916000 | 2.62180400  |
| H | -2.89670200 | -2.85834200 | 1.09993900  |
| C | -0.28409100 | 1.67419700  | -0.11333800 |
| C | -0.43785500 | 3.14711200  | -0.18937700 |
| C | 0.19023700  | 3.96109600  | 0.76622700  |
| C | -1.24152900 | 3.75398600  | -1.16508700 |
| C | 0.00751000  | 5.34052200  | 0.75369700  |
| H | 0.82958300  | 3.49864300  | 1.51139100  |
| C | -1.41716600 | 5.13784800  | -1.18344900 |
| H | -1.69950500 | 3.14036100  | -1.93479700 |
| C | -0.79774500 | 5.93494100  | -0.22137400 |
| H | 0.50088000  | 5.95581800  | 1.50060800  |
| H | -2.03166100 | 5.59247500  | -1.95524300 |
| H | -0.93303700 | 7.01252200  | -0.23521800 |
| C | -1.34874900 | 0.81525200  | -0.08378400 |
| C | -2.82967300 | 1.07103300  | -0.05804200 |
| H | -3.30655700 | 0.77024400  | -0.99792800 |
| C | -3.59534400 | 0.41465000  | 1.08329300  |
| C | -3.28846100 | 0.70741600  | 2.42012100  |



|   |             |             |             |
|---|-------------|-------------|-------------|
| C | -4.62660700 | -0.49683800 | 0.81945700  |
| C | -3.97840600 | 0.09047600  | 3.46507900  |
| H | -2.50548300 | 1.42841300  | 2.63895500  |
| C | -5.32648600 | -1.11160700 | 1.86195200  |
| H | -4.88076800 | -0.72914500 | -0.21155100 |
| C | -4.99882600 | -0.82716600 | 3.18957500  |
| H | -3.72865000 | 0.33228300  | 4.49421000  |
| H | -6.12585900 | -1.81196100 | 1.63657800  |
| H | -5.53945700 | -1.30352300 | 4.00198200  |
| C | -3.61864100 | -3.63290800 | -1.98878300 |
| C | -2.41506000 | -3.09353400 | -1.53089600 |
| C | -2.02156600 | -1.80365600 | -1.92591400 |
| C | -2.82964400 | -1.09112700 | -2.82102900 |
| C | -4.03031300 | -1.63427800 | -3.28225400 |
| C | -4.43287100 | -2.90202400 | -2.85777200 |
| H | -3.90949500 | -4.63503200 | -1.68626200 |
| H | -1.74717100 | -3.67385500 | -0.89558100 |
| H | -2.51059600 | -0.11121800 | -3.16610000 |
| H | -4.64439900 | -1.07224300 | -3.97972600 |
| H | -5.36430100 | -3.32713000 | -3.22002900 |
| C | -0.71610100 | -1.23771500 | -1.42546000 |
| H | -0.31315600 | -0.46889900 | -2.08553700 |
| H | 0.02067000  | -2.03006100 | -1.30912800 |
| N | -0.82259900 | -0.58379300 | -0.04804000 |
| H | -1.38322700 | -1.20232100 | 0.56323200  |
| H | -2.94780800 | 2.15742200  | 0.00936400  |
| O | 0.03616400  | -4.00037800 | 0.61187200  |
| H | 0.70271400  | -3.29402500 | 0.57440400  |
| H | 2.28599000  | -1.01892700 | -0.03635900 |
| O | -2.22160600 | -2.54435100 | 1.71836100  |
| H | -0.56822700 | -3.71528200 | 1.31255200  |
| H | -2.71921300 | -2.07595400 | 2.40599500  |

**TS5W**

|   |            |             |             |
|---|------------|-------------|-------------|
| C | 7.51909500 | -0.37497800 | 1.08656700  |
| C | 6.38350400 | 0.37001500  | 1.41363400  |
| C | 5.43219500 | 0.69229400  | 0.44052000  |
| C | 5.63695300 | 0.24651300  | -0.87309100 |
| C | 6.76745100 | -0.49846200 | -1.20256200 |

|   |             |             |             |
|---|-------------|-------------|-------------|
| C | 7.71395900  | -0.81202400 | -0.22294100 |
| H | 8.24658900  | -0.61703000 | 1.85641800  |
| H | 6.23353500  | 0.70522800  | 2.43725900  |
| H | 4.89862400  | 0.48930900  | -1.63174000 |
| H | 6.91441600  | -0.83277600 | -2.22606900 |
| H | 8.59471500  | -1.39359600 | -0.48016800 |
| C | 4.22089900  | 1.53533600  | 0.79013300  |
| H | 4.29075900  | 2.51866500  | 0.31701200  |
| H | 4.20018000  | 1.71133000  | 1.87713400  |
| N | 2.98286900  | 0.92742500  | 0.33023000  |
| H | 2.82897600  | -0.01800100 | 0.65008200  |
| C | 1.86876900  | 1.60622400  | -0.11460200 |
| S | 2.06267300  | 3.30152600  | -0.55752100 |
| C | 0.64277600  | 0.96356900  | -0.23268000 |
| C | -0.62482700 | 1.61542800  | -0.76904700 |
| O | -0.76563700 | 3.00442800  | -0.47263000 |
| C | -0.74446100 | 1.41010500  | -2.28937200 |
| H | -0.70662800 | 0.34931000  | -2.54071600 |
| H | -1.67341300 | 1.81835400  | -2.69525500 |
| H | 0.10682800  | 1.91473300  | -2.75330900 |
| H | -4.61389800 | 1.26197400  | -1.18751300 |
| C | 0.22170100  | -0.40538200 | 0.04135200  |
| C | 1.11500900  | -1.58889800 | 0.13965400  |
| C | 2.03561000  | -1.87366600 | -0.88539000 |
| C | 1.05247200  | -2.45986300 | 1.24031800  |
| C | 2.85582100  | -2.99795300 | -0.81520100 |
| H | 2.10243700  | -1.19945000 | -1.73355600 |
| C | 1.87483400  | -3.58541000 | 1.31012900  |
| H | 0.36033500  | -2.24116000 | 2.04800700  |
| C | 2.77739000  | -3.85880800 | 0.28209400  |
| H | 3.56091500  | -3.20001900 | -1.61597600 |
| H | 1.81375800  | -4.24442200 | 2.17149500  |
| H | 3.42109200  | -4.73162900 | 0.33807900  |
| C | -1.14357500 | -0.49120900 | 0.07351700  |
| C | -2.04083500 | -1.69826400 | 0.11245100  |
| H | -2.62453600 | -1.72475400 | 1.03961200  |
| C | -3.00864800 | -1.80601300 | -1.05979600 |
| C | -2.53670800 | -2.02901800 | -2.36064600 |
| C | -4.39130900 | -1.69736500 | -0.86294200 |

|   |             |             |             |
|---|-------------|-------------|-------------|
| C | -3.41877900 | -2.13165000 | -3.43537300 |
| H | -1.46693400 | -2.12898900 | -2.52603000 |
| C | -5.27936400 | -1.79712600 | -1.93827100 |
| H | -4.77442000 | -1.54301900 | 0.14291300  |
| C | -4.79515700 | -2.01146600 | -3.22886300 |
| H | -3.03277900 | -2.30992800 | -4.43514100 |
| H | -6.34954900 | -1.71943200 | -1.76429400 |
| H | -5.48291600 | -2.09287400 | -4.06553800 |
| C | -5.29961100 | 0.30901800  | 2.76529100  |
| C | -4.34715700 | 0.94992400  | 1.97283100  |
| C | -2.97638500 | 0.73749000  | 2.17835800  |
| C | -2.58380000 | -0.11365100 | 3.21973700  |
| C | -3.53245100 | -0.75710100 | 4.01615800  |
| C | -4.89375000 | -0.55185800 | 3.78747700  |
| H | -6.35703900 | 0.49025000  | 2.59438400  |
| H | -4.66571300 | 1.63412900  | 1.19098100  |
| H | -1.52451600 | -0.26966400 | 3.40427000  |
| H | -3.20830200 | -1.41368200 | 4.81834900  |
| H | -5.63328300 | -1.04824600 | 4.40872600  |
| C | -1.94640200 | 1.45586200  | 1.33918600  |
| H | -0.98080800 | 1.47933700  | 1.85408000  |
| H | -2.25859800 | 2.49041200  | 1.19250500  |
| N | -1.73266100 | 0.85749000  | -0.03870500 |
| H | -2.96292400 | 1.12138400  | -0.81859600 |
| H | -1.39780200 | -2.58424400 | 0.12945000  |
| O | -2.87566300 | 3.85763300  | -1.32091700 |
| H | -1.84776300 | 3.55993100  | -0.97560600 |
| H | 0.22696300  | 3.39038600  | -0.52080400 |
| O | -3.74340200 | 1.61747500  | -1.40068800 |
| H | -2.81449400 | 4.24772000  | -2.20380000 |
| H | -3.43172700 | 2.86565500  | -1.37489100 |

**Int6W**

|   |            |             |            |
|---|------------|-------------|------------|
| C | 6.38987800 | 0.92684000  | 1.19556800 |
| C | 5.70372900 | 0.26304000  | 0.17718300 |
| C | 4.76845800 | -0.73267200 | 0.48040600 |
| C | 4.52647300 | -1.05427900 | 1.82383000 |
| C | 5.20947500 | -0.38931400 | 2.84134600 |
| C | 6.14338200 | 0.60153800  | 2.52966300 |

|   |             |             |             |
|---|-------------|-------------|-------------|
| H | 7.11692700  | 1.69449000  | 0.94656200  |
| H | 5.89711500  | 0.51685600  | -0.86191600 |
| H | 3.80153200  | -1.82838500 | 2.06247800  |
| H | 5.01664900  | -0.64812600 | 3.87847700  |
| H | 6.67835800  | 1.11509600  | 3.32339800  |
| C | 4.02222000  | -1.45674200 | -0.61730200 |
| H | 3.93608800  | -2.52427500 | -0.39491200 |
| H | 4.55358800  | -1.38240700 | -1.57413400 |
| N | 2.66963800  | -0.91518400 | -0.76975300 |
| H | 2.49062900  | -0.02778000 | -0.31696700 |
| C | 1.68388900  | -1.49125200 | -1.48770300 |
| S | 1.93542800  | -2.99241100 | -2.23324900 |
| C | 0.41274200  | -0.75195500 | -1.53565500 |
| C | -0.85565900 | -1.30369200 | -1.76345700 |
| O | -0.89990100 | -2.82826500 | 2.69938900  |
| C | -1.28296800 | -2.69878900 | -2.09792600 |
| H | -1.14989900 | -2.90603800 | -3.16542400 |
| H | -0.65946700 | -3.42443400 | -1.57493400 |
| H | -2.32615100 | -2.87383400 | -1.82943100 |
| H | -0.30899000 | -1.12636900 | 2.22980100  |
| C | 0.21336300  | 0.65847400  | -1.25163800 |
| C | 1.24539700  | 1.71961200  | -1.08811400 |
| C | 1.45348700  | 2.35973700  | 0.14574500  |
| C | 2.02763400  | 2.11364400  | -2.18864500 |
| C | 2.40860200  | 3.37179000  | 0.26988200  |
| H | 0.88327900  | 2.04401200  | 1.01387700  |
| C | 2.98105000  | 3.12173300  | -2.06128400 |
| H | 1.87678600  | 1.62331800  | -3.14580900 |
| C | 3.17250300  | 3.75624300  | -0.83120500 |
| H | 2.55780200  | 3.85239300  | 1.23215200  |
| H | 3.57255900  | 3.41548900  | -2.92373500 |
| H | 3.91563600  | 4.54202800  | -0.73259300 |
| C | -1.14519300 | 0.90308900  | -1.30829300 |
| C | -1.85783300 | 2.22088500  | -1.21260900 |
| H | -2.39667400 | 2.42321000  | -2.14846800 |
| C | -2.81953600 | 2.41877500  | -0.04536000 |
| C | -2.52985100 | 1.94538900  | 1.24093700  |
| C | -4.00034200 | 3.14613600  | -0.24044500 |
| C | -3.39833100 | 2.20090200  | 2.30253600  |

|   |             |             |             |
|---|-------------|-------------|-------------|
| H | -1.62969900 | 1.36464900  | 1.41979800  |
| C | -4.86971500 | 3.40322100  | 0.82021000  |
| H | -4.23879300 | 3.52085200  | -1.23352500 |
| C | -4.56984200 | 2.93103800  | 2.09800400  |
| H | -3.15891000 | 1.82298200  | 3.29227500  |
| H | -5.78063700 | 3.96905400  | 0.64638600  |
| H | -5.24509700 | 3.12561900  | 2.92600000  |
| C | -4.08001800 | -2.23853800 | 1.51624800  |
| C | -3.33794700 | -1.66090200 | 0.48348800  |
| C | -3.97708400 | -1.05870900 | -0.60213400 |
| C | -5.37819100 | -1.03731200 | -0.63408000 |
| C | -6.12112700 | -1.61039000 | 0.39552100  |
| C | -5.47265200 | -2.21585900 | 1.47516700  |
| H | -3.54799000 | -2.70597000 | 2.33827800  |
| H | -2.25606500 | -1.69040100 | 0.53804300  |
| H | -5.89121900 | -0.56684800 | -1.47011300 |
| H | -7.20632000 | -1.58305100 | 0.35606000  |
| H | -6.05212400 | -2.66499500 | 2.27651000  |
| C | -3.22550200 | -0.45258400 | -1.78181800 |
| H | -3.63863000 | 0.53418700  | -1.99955600 |
| H | -3.39456600 | -1.06055700 | -2.67718700 |
| N | -1.78161000 | -0.29518500 | -1.61526400 |
| H | -0.05255500 | -0.33009200 | 0.92484100  |
| H | -1.07559500 | 2.98627900  | -1.15689500 |
| O | 1.55184300  | -3.02989400 | 1.49259100  |
| H | -0.09586600 | -3.18991300 | 2.25962100  |
| H | -0.75177200 | -2.98250300 | 3.64093300  |
| O | 0.30900800  | -0.48877000 | 1.80935500  |
| H | 1.64270100  | -3.30051100 | 0.56470100  |
| H | 1.40379700  | -2.06201300 | 1.46343000  |

**Com1F**

|   |             |             |             |
|---|-------------|-------------|-------------|
| C | -7.40863700 | -1.53241500 | 0.78921000  |
| C | -6.04345000 | -1.63505700 | 0.52587700  |
| C | -5.59026700 | -1.98808700 | -0.75347400 |
| C | -6.53017500 | -2.23855800 | -1.75908300 |
| C | -7.89758900 | -2.14114600 | -1.49568100 |
| C | -8.33919500 | -1.78652600 | -0.22105400 |
| H | -7.74752500 | -1.25989100 | 1.78453500  |

|   |             |             |             |
|---|-------------|-------------|-------------|
| H | -5.32195800 | -1.43844600 | 1.31470400  |
| H | -6.18873700 | -2.51368200 | -2.75365700 |
| H | -8.61538300 | -2.34109200 | -2.28578500 |
| H | -9.40258600 | -1.71025500 | -0.01406000 |
| C | -4.10945400 | -2.09556800 | -1.03814400 |
| H | -3.92774600 | -2.57873400 | -2.00534400 |
| H | -3.59896200 | -2.71053200 | -0.28831800 |
| N | -3.47877500 | -0.77400000 | -1.03633000 |
| H | -4.07571200 | 0.05286900  | -1.02261700 |
| C | -2.16827300 | -0.57110800 | -1.15061100 |
| S | -1.05156300 | -1.81387100 | -1.33020800 |
| C | -1.68771100 | 0.88719000  | -1.09959500 |
| C | -2.66826300 | 1.97027400  | -1.58408400 |
| O | -3.88092000 | 1.89662500  | -1.43384000 |
| C | -2.03955000 | 3.15723800  | -2.27551200 |
| H | -1.16034600 | 3.51527000  | -1.73264700 |
| H | -1.69784300 | 2.84632600  | -3.27080100 |
| H | -2.77517200 | 3.95502600  | -2.38383600 |
| H | -0.82410800 | 0.92991000  | -1.76448200 |
| C | -1.13023000 | 1.26515900  | 0.30434800  |
| C | -1.86338400 | 0.92846100  | 1.56406600  |
| C | -3.24406500 | 1.13632000  | 1.71747800  |
| C | -1.14152700 | 0.41408800  | 2.65446100  |
| C | -3.87705700 | 0.83546800  | 2.92475900  |
| H | -3.82669700 | 1.55250500  | 0.90449700  |
| C | -1.77510900 | 0.11657000  | 3.85868700  |
| H | -0.07411700 | 0.25046400  | 2.54541000  |
| C | -3.14866300 | 0.32311700  | 3.99878500  |
| H | -4.94367300 | 1.01563500  | 3.02591700  |
| H | -1.19560800 | -0.28273700 | 4.68596300  |
| H | -3.64502500 | 0.09008100  | 4.93618300  |
| C | 0.04920500  | 1.84911800  | 0.35200500  |
| C | 1.23815500  | 2.40809600  | 0.38117100  |
| H | 2.11713100  | 1.75636000  | 0.40343600  |
| C | 1.53144400  | 3.85432200  | 0.35261200  |
| C | 0.53158500  | 4.83582000  | 0.46569700  |
| C | 2.86824100  | 4.26280800  | 0.21483900  |
| C | 0.86030300  | 6.18782800  | 0.42699200  |
| H | -0.50195800 | 4.52933300  | 0.60197400  |

|   |            |             |             |
|---|------------|-------------|-------------|
| C | 3.19402500 | 5.61807200  | 0.17789500  |
| H | 3.64018800 | 3.50218300  | 0.13461700  |
| C | 2.19294300 | 6.58505800  | 0.28113600  |
| H | 0.07746000 | 6.93545800  | 0.51895400  |
| H | 4.23208100 | 5.91952800  | 0.06956400  |
| H | 2.44732800 | 7.64056600  | 0.25436000  |
| C | 5.82466200 | -1.92386500 | -3.80032800 |
| C | 5.50486900 | -0.75605200 | -3.10738300 |
| C | 4.18074600 | -0.46949100 | -2.74821900 |
| C | 3.17957500 | -1.38121500 | -3.11209700 |
| C | 3.49455700 | -2.55119000 | -3.80580300 |
| C | 4.81896600 | -2.82697700 | -4.15028700 |
| H | 6.85686100 | -2.12639300 | -4.07259200 |
| H | 6.29308700 | -0.05345400 | -2.84411200 |
| H | 2.14389400 | -1.17120300 | -2.85332400 |
| H | 2.70400500 | -3.24312400 | -4.08293300 |
| H | 5.06503800 | -3.73524700 | -4.69280300 |
| C | 3.84596400 | 0.77506700  | -1.94256900 |
| H | 2.81054600 | 1.07120700  | -2.14614200 |
| H | 4.48030300 | 1.60722200  | -2.27083600 |
| N | 3.98807300 | 0.63816400  | -0.48225300 |
| H | 3.43171700 | -0.16564000 | -0.16293200 |
| H | 4.95590000 | 0.41052200  | -0.26025900 |
| C | 5.07054100 | -3.96641100 | 3.46486700  |
| C | 3.85215600 | -3.84306100 | 2.79187300  |
| C | 3.39032700 | -2.59398100 | 2.36527400  |
| C | 4.17897400 | -1.46297300 | 2.62358100  |
| C | 5.39470800 | -1.58164500 | 3.29416100  |
| C | 5.84508600 | -2.83541200 | 3.71771300  |
| H | 5.41300400 | -4.94568100 | 3.78743900  |
| H | 3.25238800 | -4.72865000 | 2.59507100  |
| H | 3.83392600 | -0.48823800 | 2.29024800  |
| H | 5.99192000 | -0.69535500 | 3.49039600  |
| H | 6.79282300 | -2.92739200 | 4.24049700  |
| C | 2.06537500 | -2.45941200 | 1.64150200  |
| H | 1.39799000 | -1.80841000 | 2.22020000  |
| H | 1.57627800 | -3.44565500 | 1.60584600  |
| N | 2.22813600 | -1.83977800 | 0.31677800  |
| H | 2.70947100 | -2.48437600 | -0.30761200 |

|   |            |             |             |
|---|------------|-------------|-------------|
| H | 1.31130300 | -1.66757900 | -0.09840500 |
|---|------------|-------------|-------------|

**TS1F**

|   |             |             |             |
|---|-------------|-------------|-------------|
| C | -6.47192700 | -2.94564800 | 0.87575700  |
| C | -5.09927200 | -3.11072800 | 0.68492200  |
| C | -4.40892100 | -2.32382900 | -0.24311500 |
| C | -5.11189100 | -1.35615800 | -0.97488400 |
| C | -6.48235300 | -1.18782400 | -0.77791400 |
| C | -7.16704600 | -1.98248100 | 0.14426900  |
| H | -6.99413800 | -3.56339300 | 1.60073400  |
| H | -4.56016100 | -3.85744400 | 1.26321000  |
| H | -4.58163800 | -0.72676100 | -1.68427400 |
| H | -7.01633100 | -0.43333100 | -1.34838200 |
| H | -8.23431200 | -1.84829900 | 0.29475800  |
| C | -2.92897800 | -2.55124200 | -0.48091400 |
| H | -2.75324200 | -3.09371400 | -1.41495500 |
| H | -2.50773900 | -3.15667300 | 0.33197800  |
| N | -2.19454600 | -1.29268100 | -0.58760300 |
| H | -2.43776000 | -0.57664400 | 0.09198300  |
| C | -1.34154200 | -0.95727200 | -1.55579000 |
| S | -0.82877600 | -2.00896400 | -2.77495200 |
| C | -0.84525000 | 0.49357500  | -1.57021200 |
| C | -1.81399200 | 1.37258200  | -2.40773600 |
| O | -3.00945800 | 1.15499300  | -2.48310200 |
| C | -1.16567800 | 2.51922400  | -3.15523200 |
| H | -0.41259600 | 3.02378500  | -2.54527300 |
| H | -0.66197900 | 2.11291200  | -4.04147500 |
| H | -1.93099500 | 3.22566700  | -3.47953400 |
| H | 0.05840500  | 0.45877800  | -2.17814200 |
| C | -0.42787900 | 1.17574200  | -0.25254400 |
| C | -1.34180600 | 1.44836500  | 0.87588800  |
| C | -2.75083600 | 1.51246000  | 0.73595500  |
| C | -0.83647700 | 1.66219800  | 2.18386500  |
| C | -3.58636700 | 1.74589800  | 1.83210100  |
| H | -3.20928900 | 1.40368700  | -0.23928300 |
| C | -1.67262400 | 1.90745500  | 3.26512900  |
| H | 0.23689600  | 1.64205700  | 2.33930800  |
| C | -3.06207300 | 1.94532000  | 3.10591200  |
| H | -4.66071100 | 1.77792500  | 1.67201800  |



|   |             |             |             |
|---|-------------|-------------|-------------|
| H | -1.23431100 | 2.06357700  | 4.24755000  |
| H | -3.71367900 | 2.13015600  | 3.95414300  |
| C | 0.89989800  | 1.52204100  | -0.15001300 |
| C | 1.72064000  | 2.54917100  | 0.15399500  |
| H | 2.75685300  | 2.33190800  | 0.41108400  |
| C | 1.39704600  | 3.97863400  | 0.17861400  |
| C | 0.09716700  | 4.50222700  | 0.02374100  |
| C | 2.45358700  | 4.89450900  | 0.36480200  |
| C | -0.12104300 | 5.87825500  | 0.02544700  |
| H | -0.74151300 | 3.82601900  | -0.08305700 |
| C | 2.23019600  | 6.26780700  | 0.37551700  |
| H | 3.46436600  | 4.51451500  | 0.49499600  |
| C | 0.93873900  | 6.77033600  | 0.20096000  |
| H | -1.13265100 | 6.25545700  | -0.09675600 |
| H | 3.06579400  | 6.94751000  | 0.51843000  |
| H | 0.75997700  | 7.84140700  | 0.21112900  |
| C | 6.26154100  | -1.48018000 | -1.38027400 |
| C | 5.23426200  | -0.53806100 | -1.32558700 |
| C | 3.98011600  | -0.81413100 | -1.88633000 |
| C | 3.77853600  | -2.05048000 | -2.51657100 |
| C | 4.80608400  | -2.99284500 | -2.57457100 |
| C | 6.04894100  | -2.71097100 | -2.00372700 |
| H | 7.22932000  | -1.25039500 | -0.94424600 |
| H | 5.41066600  | 0.42425600  | -0.84974700 |
| H | 2.81323300  | -2.26666800 | -2.96836200 |
| H | 4.63888400  | -3.94321100 | -3.07327300 |
| H | 6.84964000  | -3.44296300 | -2.05154100 |
| C | 2.85233400  | 0.18961000  | -1.78822300 |
| H | 2.14321500  | 0.04151100  | -2.60668600 |
| H | 3.22899700  | 1.21539600  | -1.85266600 |
| N | 2.08740200  | 0.08699600  | -0.51988700 |
| H | 1.62024700  | -0.84051000 | -0.42228900 |
| H | 2.73085400  | 0.13143600  | 0.27062800  |
| C | 3.78021000  | -3.08331200 | 3.73258800  |
| C | 2.85998500  | -3.53727000 | 2.78557700  |
| C | 1.81744800  | -2.71314900 | 2.34655300  |
| C | 1.70805200  | -1.42207300 | 2.88245800  |
| C | 2.62421600  | -0.96611500 | 3.83055300  |
| C | 3.66508300  | -1.79536100 | 4.25589900  |

|   |             |             |             |
|---|-------------|-------------|-------------|
| H | 4.58181700  | -3.73691500 | 4.06440600  |
| H | 2.94938900  | -4.54538700 | 2.38697200  |
| H | 0.89144400  | -0.77792200 | 2.56557400  |
| H | 2.52015400  | 0.03263800  | 4.24517800  |
| H | 4.37612800  | -1.44192600 | 4.99691600  |
| C | 0.85308600  | -3.18968500 | 1.28136400  |
| H | -0.13992800 | -2.76753800 | 1.46765700  |
| H | 0.75599800  | -4.28467400 | 1.34189500  |
| N | 1.27835300  | -2.72821800 | -0.05509400 |
| H | 2.15732700  | -3.17488500 | -0.31165800 |
| H | 0.59373800  | -2.99009400 | -0.76622100 |

**Int1F**

|   |             |             |             |
|---|-------------|-------------|-------------|
| C | -6.82680000 | -2.20661900 | 1.41601700  |
| C | -5.46209400 | -2.49419000 | 1.46402800  |
| C | -4.61533200 | -2.11109500 | 0.41821500  |
| C | -5.15237400 | -1.42253100 | -0.67822700 |
| C | -6.51551000 | -1.12951500 | -0.72099600 |
| C | -7.35692300 | -1.52219600 | 0.32212100  |
| H | -7.47155300 | -2.50931900 | 2.23615700  |
| H | -5.05152600 | -3.02041100 | 2.32270800  |
| H | -4.50281000 | -1.10269500 | -1.48806200 |
| H | -6.92029200 | -0.59234300 | -1.57384900 |
| H | -8.41763900 | -1.29145600 | 0.28468900  |
| C | -3.14574700 | -2.48676000 | 0.46180000  |
| H | -2.94135900 | -3.35440600 | -0.17247700 |
| H | -2.85858400 | -2.74740800 | 1.48782100  |
| N | -2.27935300 | -1.41209400 | -0.01611900 |
| H | -2.41251200 | -0.50032200 | 0.41708500  |
| C | -1.44752500 | -1.47343700 | -1.05400900 |
| S | -1.13349800 | -2.88172100 | -1.94129600 |
| C | -0.75646800 | -0.16780500 | -1.47618400 |
| C | -1.56105800 | 0.48943900  | -2.63288000 |
| O | -2.76223300 | 0.34678700  | -2.77078400 |
| C | -0.74863100 | 1.32565200  | -3.60337000 |
| H | 0.02631200  | 1.90411500  | -3.09552600 |
| H | -0.26010100 | 0.65030500  | -4.31788000 |
| H | -1.41464300 | 1.98841000  | -4.15781700 |
| H | 0.14145500  | -0.51916700 | -1.98252800 |

|   |             |             |             |
|---|-------------|-------------|-------------|
| C | -0.30578400 | 0.87262300  | -0.43421400 |
| C | -1.25320200 | 1.59566600  | 0.42552900  |
| C | -2.65192700 | 1.65384400  | 0.17622200  |
| C | -0.82156800 | 2.24119800  | 1.61705500  |
| C | -3.53808000 | 2.26521500  | 1.06646100  |
| H | -3.06372000 | 1.23271500  | -0.73170300 |
| C | -1.70871100 | 2.85031900  | 2.49390100  |
| H | 0.23685700  | 2.26227200  | 1.84761900  |
| C | -3.08363600 | 2.86735300  | 2.23665800  |
| H | -4.59770100 | 2.27018000  | 0.82455500  |
| H | -1.31899500 | 3.32127800  | 3.39297300  |
| H | -3.77390800 | 3.34734500  | 2.92325700  |
| C | 1.08054400  | 1.16693500  | -0.39421500 |
| C | 1.82731500  | 2.31261400  | -0.18590500 |
| H | 2.87176100  | 2.15955500  | 0.09410700  |
| C | 1.47636600  | 3.71732200  | -0.29002500 |
| C | 0.23751900  | 4.21569300  | -0.75515200 |
| C | 2.46358700  | 4.67377500  | 0.05083900  |
| C | 0.01914600  | 5.58516800  | -0.88897100 |
| H | -0.55323400 | 3.52674900  | -1.01943200 |
| C | 2.23673800  | 6.03874400  | -0.07357300 |
| H | 3.42807100  | 4.32440800  | 0.41391300  |
| C | 1.00806100  | 6.50878800  | -0.54739700 |
| H | -0.94326200 | 5.93244900  | -1.25544400 |
| H | 3.02103300  | 6.74021000  | 0.19890300  |
| H | 0.82498500  | 7.57488600  | -0.64312300 |
| C | 6.06345400  | -1.98559900 | -1.37933600 |
| C | 5.10932000  | -0.96853800 | -1.41655500 |
| C | 3.80790700  | -1.22943800 | -1.86567600 |
| C | 3.47877200  | -2.52609600 | -2.28684200 |
| C | 4.43361200  | -3.54260100 | -2.25181100 |
| C | 5.72641800  | -3.27437800 | -1.79601700 |
| H | 7.06975000  | -1.76988600 | -1.03332500 |
| H | 5.38039300  | 0.03746400  | -1.10435700 |
| H | 2.47291300  | -2.73571900 | -2.64358100 |
| H | 4.17015300  | -4.54118500 | -2.58733800 |
| H | 6.47008900  | -4.06524300 | -1.77289600 |
| C | 2.76948800  | -0.13614000 | -1.87813400 |
| H | 2.01933200  | -0.31442900 | -2.64977100 |

|   |            |             |             |
|---|------------|-------------|-------------|
| H | 3.20636600 | 0.84910300  | -2.05142900 |
| N | 2.03462100 | -0.03690500 | -0.56000300 |
| H | 1.60070900 | -0.97071500 | -0.28171400 |
| H | 2.74383300 | 0.08727700  | 0.16798100  |
| C | 4.06995100 | -1.93376100 | 4.02043300  |
| C | 3.08476500 | -2.60447900 | 3.29331200  |
| C | 2.01617200 | -1.90454900 | 2.72042000  |
| C | 1.94697700 | -0.51494400 | 2.89809500  |
| C | 2.93092500 | 0.15833200  | 3.62412900  |
| C | 3.99647600 | -0.54995700 | 4.18467400  |
| H | 4.88997000 | -2.49220100 | 4.46255000  |
| H | 3.14245100 | -3.68433000 | 3.17574700  |
| H | 1.10927000 | 0.03779500  | 2.47990200  |
| H | 2.85845000 | 1.23350700  | 3.75996700  |
| H | 4.75906900 | -0.02708000 | 4.75429200  |
| C | 0.98005900 | -2.62579300 | 1.88564800  |
| H | 0.01217700 | -2.12396600 | 1.97637400  |
| H | 0.85382000 | -3.65227100 | 2.25856700  |
| N | 1.34856700 | -2.59815900 | 0.45115400  |
| H | 2.20524000 | -3.13027800 | 0.30408100  |
| H | 0.62115400 | -3.04139600 | -0.11563100 |

**TS2F**

|   |             |             |             |
|---|-------------|-------------|-------------|
| C | -7.13835900 | -1.97703500 | 1.43782800  |
| C | -5.77843500 | -2.21942900 | 1.63358300  |
| C | -4.86101600 | -2.01100100 | 0.59759000  |
| C | -5.32217000 | -1.54220500 | -0.64005700 |
| C | -6.68161600 | -1.29279300 | -0.83081200 |
| C | -7.59346100 | -1.51225400 | 0.20340800  |
| H | -7.83874400 | -2.14256500 | 2.25145700  |
| H | -5.42703400 | -2.57298600 | 2.60014500  |
| H | -4.61570900 | -1.35596600 | -1.44394700 |
| H | -7.02772700 | -0.92518100 | -1.79250700 |
| H | -8.65083600 | -1.31667600 | 0.05031200  |
| C | -3.39708200 | -2.34334200 | 0.81227800  |
| H | -3.14799000 | -3.32681300 | 0.40358900  |
| H | -3.17282800 | -2.36654400 | 1.88621700  |
| N | -2.51138700 | -1.38145300 | 0.16088500  |
| H | -2.72534400 | -0.39685200 | 0.32049100  |

|   |             |             |             |
|---|-------------|-------------|-------------|
| C | -1.49917100 | -1.65603100 | -0.64927000 |
| S | -1.00990300 | -3.24842300 | -1.02283800 |
| C | -0.77356500 | -0.47315100 | -1.30743300 |
| C | -1.57558500 | 0.00019300  | -2.55161400 |
| O | -2.76988900 | -0.20170000 | -2.69132500 |
| C | -0.77896400 | 0.74300600  | -3.60891500 |
| H | -0.02659700 | 1.40134100  | -3.16998100 |
| H | -0.26447500 | 0.00710300  | -4.24057300 |
| H | -1.46239400 | 1.31350800  | -4.23987700 |
| H | 0.11736500  | -0.92785900 | -1.73787100 |
| C | -0.28888300 | 0.70544500  | -0.43904200 |
| C | -1.23214200 | 1.51204300  | 0.34969500  |
| C | -2.60451200 | 1.67882400  | 0.01840000  |
| C | -0.81982500 | 2.14054500  | 1.55505100  |
| C | -3.49252500 | 2.36724300  | 0.85158200  |
| H | -2.99005500 | 1.29408600  | -0.91843100 |
| C | -1.70191700 | 2.83382600  | 2.37110700  |
| H | 0.22307300  | 2.07913800  | 1.84449300  |
| C | -3.05739400 | 2.94867800  | 2.03844800  |
| H | -4.53283100 | 2.45495900  | 0.54872500  |
| H | -1.32874900 | 3.28730100  | 3.28613900  |
| H | -3.74511400 | 3.48907500  | 2.68134500  |
| C | 1.09016500  | 1.06043700  | -0.51944600 |
| C | 1.73981900  | 2.28348300  | -0.39755500 |
| H | 2.81436100  | 2.22118500  | -0.21161700 |
| C | 1.28027200  | 3.65750100  | -0.49939500 |
| C | 0.02733000  | 4.06598900  | -1.01301000 |
| C | 2.17733500  | 4.68747900  | -0.12383900 |
| C | -0.29369100 | 5.41436800  | -1.14623200 |
| H | -0.69387700 | 3.32051800  | -1.32027900 |
| C | 1.85039800  | 6.03231700  | -0.25037800 |
| H | 3.15290200  | 4.41138000  | 0.27158700  |
| C | 0.60643600  | 6.41075700  | -0.76338900 |
| H | -1.26494900 | 5.68814300  | -1.55034600 |
| H | 2.56906000  | 6.78986500  | 0.05230500  |
| H | 0.34461400  | 7.46019000  | -0.86118300 |
| C | 6.06593500  | -1.87705400 | -1.92295200 |
| C | 5.06141400  | -0.90817600 | -1.94211200 |
| C | 3.72014200  | -1.27186800 | -2.11866900 |

|   |            |             |             |
|---|------------|-------------|-------------|
| C | 3.40391600 | -2.62917600 | -2.28236300 |
| C | 4.40688400 | -3.59928800 | -2.26342300 |
| C | 5.74026800 | -3.22479800 | -2.08161400 |
| H | 7.10182700 | -1.57872200 | -1.79134400 |
| H | 5.32132200 | 0.14178200  | -1.82934200 |
| H | 2.36761600 | -2.92378000 | -2.43518000 |
| H | 4.14867900 | -4.64524600 | -2.40163000 |
| H | 6.52161000 | -3.97890000 | -2.07248400 |
| C | 2.62856100 | -0.22679500 | -2.09115100 |
| H | 1.80646600 | -0.52150900 | -2.74616300 |
| H | 2.99607200 | 0.74406000  | -2.44115500 |
| N | 2.08476700 | -0.06295400 | -0.70332500 |
| H | 1.78558400 | -1.26061800 | -0.00902100 |
| H | 2.89249300 | 0.22174300  | -0.14512000 |
| C | 4.33282600 | -1.74959600 | 4.27687300  |
| C | 3.20673300 | -2.21548200 | 3.59755200  |
| C | 2.41953600 | -1.34125700 | 2.83664200  |
| C | 2.77615900 | 0.01342200  | 2.77295000  |
| C | 3.90243400 | 0.47954000  | 3.45201400  |
| C | 4.68316200 | -0.40064800 | 4.20357200  |
| H | 4.93075700 | -2.43730500 | 4.86736300  |
| H | 2.93078100 | -3.26529900 | 3.66784300  |
| H | 2.16864600 | 0.70680600  | 2.19640800  |
| H | 4.16337100 | 1.53227800  | 3.40003900  |
| H | 5.55629000 | -0.03553400 | 4.73595000  |
| C | 1.22304000 | -1.86379700 | 2.07633600  |
| H | 0.44107000 | -1.10450500 | 1.99137100  |
| H | 0.80031700 | -2.74123700 | 2.57466700  |
| N | 1.58921500 | -2.23757600 | 0.67274400  |
| H | 2.41596300 | -2.83557300 | 0.65221000  |
| H | 0.80969400 | -2.74207400 | 0.20583000  |

**Int2F'**

|   |             |             |             |
|---|-------------|-------------|-------------|
| C | -7.25741500 | -1.83065300 | 1.44640100  |
| C | -5.90171600 | -2.07088100 | 1.67047400  |
| C | -4.97007400 | -1.91650800 | 0.63741000  |
| C | -5.41340600 | -1.50424500 | -0.62652300 |
| C | -6.76891900 | -1.25567500 | -0.84557500 |
| C | -7.69464000 | -1.42139900 | 0.18597300  |

|   |             |             |             |
|---|-------------|-------------|-------------|
| H | -7.96881800 | -1.95457600 | 2.25785100  |
| H | -5.56449500 | -2.38103600 | 2.65671800  |
| H | -4.69633700 | -1.36166500 | -1.42981900 |
| H | -7.10079800 | -0.93159100 | -1.82772000 |
| H | -8.74886900 | -1.22765200 | 0.01058900  |
| C | -3.51291300 | -2.25172500 | 0.88716800  |
| H | -3.27574500 | -3.26594500 | 0.55337200  |
| H | -3.29590100 | -2.20464300 | 1.96207700  |
| N | -2.61032500 | -1.35042700 | 0.17478700  |
| H | -2.85105100 | -0.36022300 | 0.20828700  |
| C | -1.53119400 | -1.68768100 | -0.51405800 |
| S | -0.99276000 | -3.30683100 | -0.64370900 |
| C | -0.78636700 | -0.57400000 | -1.26220400 |
| C | -1.59042900 | -0.13969100 | -2.51776500 |
| O | -2.79520100 | -0.29744700 | -2.62894000 |
| C | -0.78689900 | 0.51604200  | -3.62665600 |
| H | 0.00609300  | 1.15835900  | -3.23874200 |
| H | -0.32404200 | -0.27102000 | -4.23617500 |
| H | -1.46002100 | 1.08853700  | -4.26698200 |
| H | 0.09176700  | -1.07361800 | -1.66839900 |
| C | -0.26515600 | 0.64065600  | -0.46418700 |
| C | -1.18268400 | 1.48960100  | 0.31210300  |
| C | -2.54498300 | 1.70963000  | -0.02525200 |
| C | -0.74776000 | 2.11103900  | 1.51229000  |
| C | -3.40795200 | 2.43835800  | 0.80047600  |
| H | -2.93917700 | 1.34014300  | -0.96524400 |
| C | -1.60266200 | 2.84620600  | 2.32075000  |
| H | 0.29152500  | 2.00796200  | 1.80423500  |
| C | -2.95228600 | 3.01052400  | 1.98390900  |
| H | -4.44290800 | 2.56733100  | 0.49394100  |
| H | -1.21447900 | 3.29203100  | 3.23332900  |
| H | -3.61954400 | 3.58189200  | 2.62160900  |
| C | 1.11401300  | 0.98518500  | -0.59975500 |
| C | 1.75908000  | 2.21583500  | -0.53308000 |
| H | 2.83993800  | 2.16260700  | -0.38431300 |
| C | 1.29024800  | 3.58638400  | -0.65025500 |
| C | 0.03634400  | 3.98029700  | -1.17243700 |
| C | 2.17927900  | 4.62708500  | -0.28625500 |
| C | -0.29556500 | 5.32441900  | -1.31929800 |

|   |             |             |             |
|---|-------------|-------------|-------------|
| H | -0.67677300 | 3.22577600  | -1.47668400 |
| C | 1.84244900  | 5.96828000  | -0.42759600 |
| H | 3.15618600  | 4.36246000  | 0.11380600  |
| C | 0.59615900  | 6.33191000  | -0.94510500 |
| H | -1.26779200 | 5.58649300  | -1.72886700 |
| H | 2.55512400  | 6.73438500  | -0.13229700 |
| H | 0.32630400  | 7.37822200  | -1.05411400 |
| C | 6.02778500  | -2.02604200 | -2.08407600 |
| C | 5.02369700  | -1.05669400 | -2.11951800 |
| C | 3.67374900  | -1.42594100 | -2.17232300 |
| C | 3.34834400  | -2.79087000 | -2.19379500 |
| C | 4.35012700  | -3.76141900 | -2.15810400 |
| C | 5.69298700  | -3.38055900 | -2.10127500 |
| H | 7.07016300  | -1.72293100 | -2.05001600 |
| H | 5.29038400  | -0.00238400 | -2.11661100 |
| H | 2.30425300  | -3.09218300 | -2.25167900 |
| H | 4.08325400  | -4.81403600 | -2.18664300 |
| H | 6.47336000  | -4.13545500 | -2.07969300 |
| C | 2.58433400  | -0.37786200 | -2.16226300 |
| H | 1.74036500  | -0.71065200 | -2.76976800 |
| H | 2.94095600  | 0.56805500  | -2.58746100 |
| N | 2.09766300  | -0.14217400 | -0.76780000 |
| H | 1.81428900  | -1.36584500 | 0.12955100  |
| H | 2.92928700  | 0.17228700  | -0.26412200 |
| C | 4.38754800  | -1.44389600 | 4.41014000  |
| C | 3.23562900  | -1.92208200 | 3.78510300  |
| C | 2.49973500  | -1.10104000 | 2.92045500  |
| C | 2.93354500  | 0.21347000  | 2.69599500  |
| C | 4.08573400  | 0.69124100  | 3.32119900  |
| C | 4.81498000  | -0.13585400 | 4.17748000  |
| H | 4.94522400  | -2.08903900 | 5.08233800  |
| H | 2.89889500  | -2.93794200 | 3.97978700  |
| H | 2.36811500  | 0.86695000  | 2.03571500  |
| H | 4.40741100  | 1.71313400  | 3.14465200  |
| H | 5.70832700  | 0.23964600  | 4.66731700  |
| C | 1.27318100  | -1.64230900 | 2.22516100  |
| H | 0.52831800  | -0.86213800 | 2.04751800  |
| H | 0.81062200  | -2.43990200 | 2.81254600  |
| N | 1.60995200  | -2.19718600 | 0.87116700  |



|   |            |             |            |
|---|------------|-------------|------------|
| H | 2.41596000 | -2.82218800 | 0.91067000 |
| H | 0.79981300 | -2.71702100 | 0.46244100 |

**Int2F**

|   |             |             |             |
|---|-------------|-------------|-------------|
| C | 6.27187800  | -1.93025600 | -1.32493800 |
| C | 5.18514700  | -1.05772900 | -1.24745800 |
| C | 4.01553400  | -1.30975200 | -1.97353700 |
| C | 3.95190900  | -2.45731900 | -2.77659800 |
| C | 5.03294900  | -3.33485600 | -2.84683200 |
| C | 6.19778900  | -3.07201500 | -2.12286800 |
| H | 7.17303700  | -1.71988700 | -0.75623900 |
| H | 5.24524900  | -0.17340000 | -0.61832300 |
| H | 3.04931800  | -2.66661500 | -3.34457000 |
| H | 4.96704900  | -4.22205300 | -3.46988500 |
| H | 7.04093800  | -3.75423100 | -2.17991200 |
| C | 2.86074200  | -0.33514200 | -1.91386900 |
| H | 2.72928900  | 0.18758400  | -2.86933100 |
| H | 3.03840900  | 0.43224600  | -1.15219100 |
| N | 1.60038900  | -1.01111000 | -1.60256300 |
| H | 1.62886800  | -1.98084600 | -1.28614800 |
| C | 0.39422200  | -0.47445600 | -1.75148900 |
| S | 0.11550100  | 1.07510800  | -2.37390900 |
| C | -0.79371300 | -1.31515100 | -1.27379700 |
| C | -0.67651100 | -2.83213600 | -1.48229300 |
| O | 0.38257500  | -3.43756200 | -1.42386900 |
| C | -1.97544200 | -3.55426900 | -1.76813100 |
| H | -2.78362000 | -3.17716200 | -1.13494300 |
| H | -2.26547900 | -3.36432000 | -2.80912700 |
| H | -1.84389000 | -4.62769200 | -1.62640200 |
| H | -1.65366600 | -0.99085200 | -1.86468800 |
| C | -1.12153400 | -1.02016300 | 0.20839000  |
| C | -0.31621400 | -1.73428800 | 1.25260000  |
| C | -0.75800900 | -2.94189500 | 1.81922200  |
| C | 0.91842200  | -1.21537500 | 1.68346800  |
| C | -0.00125800 | -3.60723800 | 2.78400600  |
| H | -1.71290700 | -3.35629700 | 1.50863500  |
| C | 1.67775000  | -1.88255700 | 2.64635400  |
| H | 1.28497000  | -0.28172200 | 1.26530000  |
| C | 1.22194200  | -3.08009100 | 3.19896800  |

|   |             |             |             |
|---|-------------|-------------|-------------|
| H | -0.36836900 | -4.53619000 | 3.21105700  |
| H | 2.62658100  | -1.46145000 | 2.96687400  |
| H | 1.81383200  | -3.59713700 | 3.94871100  |
| C | -2.06230800 | -0.07930500 | 0.52692500  |
| C | -2.46223800 | 0.16394100  | 1.97068600  |
| H | -2.39327000 | 1.23601500  | 2.19139600  |
| C | -3.85167800 | -0.32602900 | 2.36668600  |
| C | -4.43051000 | -1.46150800 | 1.78662200  |
| C | -4.55875200 | 0.33708500  | 3.37935700  |
| C | -5.67831100 | -1.92308100 | 2.20821200  |
| H | -3.89950300 | -1.98169400 | 0.99535100  |
| C | -5.80432100 | -0.12354900 | 3.80596900  |
| H | -4.12648300 | 1.22236700  | 3.83991100  |
| C | -6.36977800 | -1.25750600 | 3.22084100  |
| H | -6.11089200 | -2.80454800 | 1.74309100  |
| H | -6.33430600 | 0.40652300  | 4.59220500  |
| H | -7.34129100 | -1.61593500 | 3.54794100  |
| C | -5.05219400 | 3.89531300  | -2.98329700 |
| C | -4.30348200 | 3.51357900  | -1.86740600 |
| C | -4.38344400 | 2.21175100  | -1.36514700 |
| C | -5.22371900 | 1.29047900  | -2.00561400 |
| C | -5.97028600 | 1.66725200  | -3.11978600 |
| C | -5.88720500 | 2.97288200  | -3.61182600 |
| H | -4.97693400 | 4.91038000  | -3.36248200 |
| H | -3.64808400 | 4.23379100  | -1.38404400 |
| H | -5.28262500 | 0.27517700  | -1.62382800 |
| H | -6.61958900 | 0.94407400  | -3.60527800 |
| H | -6.46855500 | 3.26615600  | -4.48116600 |
| C | -3.59193700 | 1.80068400  | -0.13907000 |
| H | -4.28563000 | 1.50245800  | 0.65211100  |
| H | -3.03184600 | 2.67250400  | 0.23554000  |
| N | -2.71354000 | 0.67166600  | -0.44449900 |
| H | -1.72754400 | -0.32663400 | 2.61401300  |
| H | -2.14149300 | 0.85424800  | -1.26720300 |
| C | 6.09606900  | 4.54193700  | 2.13360900  |
| C | 4.96709200  | 4.50133000  | 1.31534300  |
| C | 4.27734200  | 3.30166500  | 1.09959700  |
| C | 4.73691700  | 2.14139400  | 1.73522000  |
| C | 5.86335300  | 2.18023200  | 2.55900900  |

|   |            |            |             |
|---|------------|------------|-------------|
| C | 6.54906400 | 3.37915200 | 2.75932900  |
| H | 6.61701000 | 5.48267700 | 2.28870600  |
| H | 4.61485200 | 5.41307600 | 0.83781300  |
| H | 4.19219300 | 1.21501900 | 1.58491200  |
| H | 6.20457100 | 1.27151200 | 3.04767900  |
| H | 7.42456600 | 3.40910100 | 3.40156900  |
| C | 3.08205200 | 3.27144600 | 0.16266200  |
| H | 3.43671100 | 3.08673600 | -0.86059600 |
| H | 2.62812700 | 4.27659800 | 0.14321400  |
| N | 2.13448000 | 2.20122600 | 0.48493500  |
| H | 1.64177600 | 2.41960000 | 1.34790300  |
| H | 1.43675600 | 2.12039200 | -0.25390500 |

**Int3F**

|   |             |             |             |
|---|-------------|-------------|-------------|
| C | -4.82206600 | -4.55823300 | -2.78421500 |
| C | -3.70283900 | -3.77331200 | -3.06646300 |
| C | -3.30166000 | -2.76030700 | -2.18868900 |
| C | -4.03980400 | -2.55132200 | -1.01517800 |
| C | -5.15272300 | -3.33971200 | -0.72712400 |
| C | -5.54891600 | -4.34395900 | -1.61295500 |
| H | -5.12044100 | -5.34036700 | -3.47636400 |
| H | -3.13514900 | -3.94849300 | -3.97692100 |
| H | -3.74216200 | -1.77507700 | -0.31600600 |
| H | -5.70722700 | -3.16362600 | 0.18977800  |
| H | -6.41723600 | -4.95714600 | -1.39002200 |
| C | -2.11492400 | -1.88323600 | -2.52463900 |
| H | -2.42815200 | -0.86217600 | -2.77177100 |
| H | -1.59275600 | -2.26651900 | -3.40987000 |
| N | -1.17813700 | -1.79451500 | -1.40650800 |
| H | -1.22689200 | -2.50165300 | -0.66962200 |
| C | -0.32438500 | -0.79602700 | -1.19816700 |
| S | -0.15729600 | 0.53342300  | -2.23236200 |
| C | 0.58314200  | -0.92195400 | 0.02789800  |
| C | -0.01412500 | -1.63107300 | 1.25167300  |
| O | -0.81162800 | -2.55524600 | 1.16622000  |
| C | 0.44241300  | -1.10945200 | 2.59120900  |
| H | 1.49410000  | -0.81001500 | 2.57359800  |
| H | -0.16472000 | -0.21851000 | 2.79413100  |
| H | 0.26207200  | -1.85430500 | 3.36788200  |

|   |            |             |             |
|---|------------|-------------|-------------|
| H | 0.79963500 | 0.09722100  | 0.35182800  |
| C | 1.92970100 | -1.58071100 | -0.34538700 |
| C | 1.95189900 | -3.06871900 | -0.52039700 |
| C | 2.12351600 | -3.94694100 | 0.56215900  |
| C | 1.78071100 | -3.62782300 | -1.79965700 |
| C | 2.13089700 | -5.32940800 | 0.37574300  |
| H | 2.26219800 | -3.54204700 | 1.56022800  |
| C | 1.78795300 | -5.01011200 | -1.98985000 |
| H | 1.64871400 | -2.96312600 | -2.64861600 |
| C | 1.96200100 | -5.86571600 | -0.90123700 |
| H | 2.27042400 | -5.98698400 | 1.22893900  |
| H | 1.65842900 | -5.41791400 | -2.98847300 |
| H | 1.96727600 | -6.94202500 | -1.04678300 |
| C | 3.01907400 | -0.79890600 | -0.61386700 |
| C | 4.38797300 | -1.41186300 | -0.84776300 |
| H | 4.82637900 | -0.99744800 | -1.76319400 |
| C | 5.38389700 | -1.23973400 | 0.29576200  |
| C | 4.98588800 | -1.33341000 | 1.63555000  |
| C | 6.74242200 | -1.03658500 | 0.01751700  |
| C | 5.91895600 | -1.22699200 | 2.66725500  |
| H | 3.93678200 | -1.49123900 | 1.86626500  |
| C | 7.67869300 | -0.93219500 | 1.04700400  |
| H | 7.06968000 | -0.96128700 | -1.01686800 |
| C | 7.26946000 | -1.02627200 | 2.37759000  |
| H | 5.58976400 | -1.30109200 | 3.70000400  |
| H | 8.72650100 | -0.77380100 | 0.80819100  |
| H | 7.99527400 | -0.94176500 | 3.18095000  |
| C | 3.50934200 | 5.26640900  | -1.01295300 |
| C | 3.74080500 | 3.95897800  | -1.44967300 |
| C | 3.74769200 | 2.89392100  | -0.54482200 |
| C | 3.51015300 | 3.15865400  | 0.81229900  |
| C | 3.27693700 | 4.46126100  | 1.25152700  |
| C | 3.27652700 | 5.52074700  | 0.33806200  |
| H | 3.50838000 | 6.08246100  | -1.72974600 |
| H | 3.91613400 | 3.76483600  | -2.50478600 |
| H | 3.51213000 | 2.33338000  | 1.51870300  |
| H | 3.10439800 | 4.65351600  | 2.30683300  |
| H | 3.09859600 | 6.53592700  | 0.68050600  |
| C | 4.02620300 | 1.47606700  | -1.00755800 |

|   |             |             |             |
|---|-------------|-------------|-------------|
| H | 4.93999300  | 1.11918000  | -0.52506300 |
| H | 4.21519100  | 1.48184900  | -2.09285500 |
| N | 2.92496800  | 0.58966600  | -0.64200800 |
| H | 4.25372400  | -2.48100500 | -1.02996400 |
| H | 2.03354900  | 0.91825900  | -1.00930700 |
| C | -6.32827900 | -0.34067100 | 3.58180000  |
| C | -5.41715100 | 0.66020100  | 3.24570800  |
| C | -4.12262100 | 0.34321900  | 2.81180200  |
| C | -3.76433600 | -1.00751600 | 2.70985100  |
| C | -4.67773700 | -2.01212500 | 3.04009600  |
| C | -5.96125400 | -1.68405600 | 3.47937700  |
| H | -7.32670200 | -0.07194400 | 3.91572700  |
| H | -5.71418700 | 1.70415000  | 3.31810500  |
| H | -2.77035500 | -1.27398800 | 2.36829200  |
| H | -4.37895700 | -3.05338500 | 2.95569600  |
| H | -6.66954500 | -2.46609700 | 3.73815800  |
| C | -3.14251500 | 1.45785500  | 2.49138300  |
| H | -2.61255100 | 1.74131900  | 3.41222500  |
| H | -3.72156500 | 2.34967600  | 2.19657700  |
| N | -2.12645900 | 1.06776800  | 1.50690500  |
| H | -2.58746300 | 0.79721000  | 0.63966200  |
| H | -1.54614800 | 1.87909000  | 1.26614000  |
| C | -4.28239000 | 4.50375600  | -1.08934900 |
| C | -3.04586000 | 4.20464900  | -0.51372500 |
| C | -1.97422100 | 5.09834700  | -0.62194400 |
| C | -2.16976100 | 6.29508200  | -1.32457600 |
| C | -3.40570300 | 6.60023400  | -1.89281900 |
| C | -4.46895000 | 5.70264300  | -1.77752900 |
| H | -5.10169200 | 3.79566300  | -0.99995800 |
| H | -2.90183900 | 3.27020700  | 0.01666300  |
| H | -1.34239200 | 6.99367700  | -1.42868800 |
| H | -3.53590800 | 7.53336100  | -2.43391700 |
| H | -5.43116100 | 5.93356300  | -2.22548100 |
| C | -0.62652300 | 4.82337500  | 0.01917700  |
| H | -0.59340200 | 5.31726900  | 1.00079700  |
| H | 0.15276400  | 5.31101400  | -0.58797200 |
| N | -0.36782100 | 3.39467300  | 0.24376400  |
| H | -0.33850900 | 2.89708600  | -0.64702400 |
| H | 0.56183300  | 3.29484700  | 0.64691900  |

**TS3F**

|   |             |            |             |
|---|-------------|------------|-------------|
| C | 4.70359400  | 4.45998900 | -1.12451000 |
| C | 3.36469300  | 4.52346400 | -1.51102500 |
| C | 2.33864700  | 4.23219100 | -0.60213000 |
| C | 2.68432500  | 3.86883900 | 0.70544100  |
| C | 4.02468500  | 3.80429000 | 1.09433400  |
| C | 5.03917700  | 4.10017900 | 0.18229800  |
| H | 5.48441800  | 4.68629400 | -1.84498800 |
| H | 3.11084200  | 4.80121500 | -2.53112700 |
| H | 1.90562300  | 3.63862300 | 1.42681100  |
| H | 4.27431200  | 3.53016800 | 2.11575600  |
| H | 6.08067600  | 4.05124200 | 0.48598200  |
| C | 0.88959700  | 4.37799200 | -1.04897900 |
| H | 0.78586200  | 4.09748100 | -2.09903900 |
| H | 0.59136000  | 5.43131500 | -0.95520000 |
| N | -0.04581000 | 3.58036700 | -0.27818400 |
| H | -0.19687300 | 3.80288900 | 0.71538000  |
| C | -0.70549200 | 2.49007100 | -0.69510800 |
| S | -0.59592100 | 1.93573900 | -2.30988500 |
| C | -1.47018700 | 1.73018000 | 0.35275100  |
| C | -1.50428900 | 2.26047900 | 1.74059700  |
| O | -0.78219600 | 3.18243200 | 2.16766100  |
| C | -2.35737400 | 1.54192200 | 2.77592400  |
| H | -2.62197200 | 0.52448200 | 2.48347300  |
| H | -1.81614200 | 1.54677800 | 3.72543700  |
| H | -3.28994000 | 2.09596200 | 2.91937200  |
| H | -0.40585000 | 0.85166500 | 0.71265500  |
| C | -2.77612900 | 1.06563800 | -0.08469100 |
| C | -3.99513600 | 1.90294600 | 0.16624900  |
| C | -5.11798400 | 1.43439200 | 0.87512600  |
| C | -4.02549900 | 3.23816000 | -0.28125100 |
| C | -6.22672600 | 2.25085500 | 1.10396400  |
| H | -5.11650300 | 0.42024200 | 1.26387900  |
| C | -5.12990500 | 4.05605100 | -0.04951600 |
| H | -3.17788000 | 3.63030100 | -0.83394700 |
| C | -6.23917200 | 3.56747600 | 0.64374400  |
| H | -7.07666500 | 1.85711400 | 1.65486800  |
| H | -5.12544800 | 5.07837100 | -0.41769000 |

|   |             |             |             |
|---|-------------|-------------|-------------|
| H | -7.09885900 | 4.20567700  | 0.82613200  |
| C | -2.86356500 | -0.13544000 | -0.72719700 |
| C | -4.18056800 | -0.71205400 | -1.20999700 |
| H | -4.11610400 | -0.88756000 | -2.29096300 |
| C | -4.63676600 | -2.00192100 | -0.53757700 |
| C | -4.20749400 | -2.36828300 | 0.74449100  |
| C | -5.55083000 | -2.83850200 | -1.19515500 |
| C | -4.68185800 | -3.53205600 | 1.35398700  |
| H | -3.48799400 | -1.74071600 | 1.26107200  |
| C | -6.02874400 | -3.99944400 | -0.58873800 |
| H | -5.89274300 | -2.57266400 | -2.19283700 |
| C | -5.59543900 | -4.35143700 | 0.69127300  |
| H | -4.33428700 | -3.79813300 | 2.34852100  |
| H | -6.73711100 | -4.63125700 | -1.11726700 |
| H | -5.96348900 | -5.25712600 | 1.16433500  |
| C | 1.54253400  | -3.37047200 | -3.35777100 |
| C | 0.39361300  | -2.57541700 | -3.28834300 |
| C | -0.48843200 | -2.68428600 | -2.20730000 |
| C | -0.19864400 | -3.61060000 | -1.19464800 |
| C | 0.94924000  | -4.39942700 | -1.25560800 |
| C | 1.82558500  | -4.28046200 | -2.33857900 |
| H | 2.20969200  | -3.28112800 | -4.21075200 |
| H | 0.17579700  | -1.86754200 | -4.08399200 |
| H | -0.88998700 | -3.71724200 | -0.36312900 |
| H | 1.15739100  | -5.11295100 | -0.46366900 |
| H | 2.71628700  | -4.89960900 | -2.39010700 |
| C | -1.75049000 | -1.84923300 | -2.14449900 |
| H | -2.60160900 | -2.52325400 | -2.01945300 |
| H | -1.88267000 | -1.32425900 | -3.10287800 |
| N | -1.72174200 | -0.91346700 | -1.00956300 |
| H | -4.96205000 | 0.03929000  | -1.08706800 |
| H | -0.92548700 | -0.29153400 | -1.13256200 |
| C | 3.48669600  | -3.02775400 | 2.58704900  |
| C | 2.44988100  | -2.42253500 | 1.87868300  |
| C | 1.38619300  | -1.80959500 | 2.55675200  |
| C | 1.38432700  | -1.82024900 | 3.95706700  |
| C | 2.41916900  | -2.43008700 | 4.66866600  |
| C | 3.47319500  | -3.03460900 | 3.98402900  |
| H | 4.30737300  | -3.48755400 | 2.04547300  |

|   |             |             |             |
|---|-------------|-------------|-------------|
| H | 2.46948900  | -2.42117100 | 0.79285200  |
| H | 0.56359800  | -1.35110800 | 4.49470600  |
| H | 2.40036600  | -2.43191800 | 5.75471700  |
| H | 4.28036000  | -3.50882200 | 4.53487000  |
| C | 0.26277200  | -1.13855300 | 1.79643400  |
| H | -0.55018200 | -0.88890000 | 2.48494500  |
| H | -0.15640700 | -1.79272000 | 1.02878200  |
| N | 0.66362400  | 0.11272500  | 1.10185900  |
| H | 1.18533100  | 0.71248100  | 1.74189800  |
| H | 1.28991000  | -0.06408200 | 0.28385000  |
| C | 5.97294400  | -2.51691200 | -0.98562400 |
| C | 5.01454700  | -1.70206800 | -1.58894800 |
| C | 4.63191600  | -0.48684800 | -1.00431100 |
| C | 5.23598200  | -0.10402600 | 0.19921900  |
| C | 6.20012000  | -0.91224800 | 0.80337700  |
| C | 6.57116000  | -2.12142300 | 0.21291200  |
| H | 6.26240600  | -3.45249800 | -1.45601700 |
| H | 4.56172100  | -2.00891800 | -2.52895900 |
| H | 4.95380400  | 0.84036100  | 0.65666300  |
| H | 6.66371400  | -0.59659900 | 1.73367400  |
| H | 7.32727000  | -2.74749000 | 0.67815300  |
| C | 3.58593700  | 0.38506800  | -1.66560200 |
| H | 3.80299300  | 0.44450800  | -2.74386600 |
| H | 3.65146300  | 1.40392700  | -1.27419200 |
| N | 2.21315900  | -0.10583200 | -1.41062300 |
| H | 1.54842300  | 0.51438300  | -1.88297200 |
| H | 2.09462200  | -1.02131800 | -1.84271400 |

**Int4F**

|   |            |            |             |
|---|------------|------------|-------------|
| C | 4.74871200 | 4.14955000 | -1.12491400 |
| C | 3.40796500 | 4.08148100 | -1.50971600 |
| C | 2.38844200 | 3.92588300 | -0.56083700 |
| C | 2.74892100 | 3.84809000 | 0.79378400  |
| C | 4.08989800 | 3.90952100 | 1.18131100  |
| C | 5.09574200 | 4.05869800 | 0.22388800  |
| H | 5.52043000 | 4.26978800 | -1.87983600 |
| H | 3.14641200 | 4.15264000 | -2.56255600 |
| H | 1.98408900 | 3.74945200 | 1.55945800  |
| H | 4.34762800 | 3.85664600 | 2.23571900  |



|   |             |             |             |
|---|-------------|-------------|-------------|
| H | 6.13707400  | 4.11213400  | 0.52732300  |
| C | 0.94060400  | 3.90115900  | -1.02323600 |
| H | 0.86943500  | 3.54383600  | -2.05308300 |
| H | 0.55072000  | 4.93229600  | -1.02461600 |
| N | 0.08483800  | 3.05752800  | -0.21250500 |
| H | 0.10928500  | 3.15006800  | 0.80268600  |
| C | -0.90960200 | 2.24334300  | -0.65802500 |
| S | -1.11082900 | 1.94546500  | -2.33765500 |
| C | -1.75990600 | 1.64336500  | 0.36538100  |
| C | -1.37508900 | 1.59893000  | 1.71728300  |
| O | -0.22333000 | 1.99049900  | 2.17535100  |
| C | -2.31663200 | 1.00751600  | 2.75475800  |
| H | -2.45843700 | -0.06617400 | 2.58531700  |
| H | -1.88119800 | 1.15745300  | 3.74472800  |
| H | -3.30566100 | 1.47273900  | 2.71696800  |
| H | 0.97143500  | 1.20529600  | 1.52569000  |
| C | -3.12780200 | 1.13546900  | -0.01664100 |
| C | -4.25573800 | 2.09718900  | 0.15239200  |
| C | -5.42814100 | 1.76623300  | 0.85903000  |
| C | -4.15393600 | 3.40735100  | -0.35512500 |
| C | -6.46225000 | 2.68954600  | 1.02641000  |
| H | -5.52575000 | 0.77496200  | 1.29192000  |
| C | -5.18358200 | 4.32951200  | -0.18583900 |
| H | -3.26382400 | 3.68858600  | -0.90761600 |
| C | -6.34623300 | 3.97712800  | 0.50493700  |
| H | -7.35343300 | 2.40157600  | 1.57788100  |
| H | -5.08043300 | 5.32887800  | -0.60052300 |
| H | -7.14694500 | 4.69902600  | 0.63845100  |
| C | -3.29665800 | -0.13541000 | -0.47364400 |
| C | -4.59003500 | -0.67561300 | -1.04286700 |
| H | -4.43360100 | -0.90066000 | -2.10651900 |
| C | -5.16185800 | -1.91350700 | -0.36670200 |
| C | -4.98655800 | -2.15711500 | 1.00225200  |
| C | -5.92759900 | -2.82385500 | -1.10861700 |
| C | -5.56767700 | -3.27015200 | 1.61175800  |
| H | -4.38234000 | -1.47222000 | 1.58900600  |
| C | -6.51059900 | -3.93736100 | -0.50305600 |
| H | -6.07206500 | -2.65351200 | -2.17319500 |
| C | -6.33305500 | -4.16466700 | 0.86250000  |

|   |             |             |             |
|---|-------------|-------------|-------------|
| H | -5.41919500 | -3.43964500 | 2.67482800  |
| H | -7.10107700 | -4.62801200 | -1.09879000 |
| H | -6.78343300 | -5.03188600 | 1.33675400  |
| C | 1.04111500  | -4.22195800 | -2.06105800 |
| C | 0.00386000  | -3.31783900 | -2.30610600 |
| C | -0.85081300 | -2.90783400 | -1.27383100 |
| C | -0.63952400 | -3.42021800 | 0.01487200  |
| C | 0.40042500  | -4.31792100 | 0.26273000  |
| C | 1.24505000  | -4.72277400 | -0.77425400 |
| H | 1.68523900  | -4.53804500 | -2.87697600 |
| H | -0.15271600 | -2.93286300 | -3.31102200 |
| H | -1.30741400 | -3.11115200 | 0.81277800  |
| H | 0.54594800  | -4.71072300 | 1.26524700  |
| H | 2.04959000  | -5.42646100 | -0.58186800 |
| C | -2.00684100 | -1.96951600 | -1.56180100 |
| H | -2.91446000 | -2.57126800 | -1.68750900 |
| H | -1.82779900 | -1.45057400 | -2.51691000 |
| N | -2.21860100 | -1.03833600 | -0.45632200 |
| H | -5.33667500 | 0.12148900  | -1.02439600 |
| H | -1.36711800 | -0.53154700 | -0.23381200 |
| C | 4.84415100  | -2.75167300 | 2.01859300  |
| C | 3.61590900  | -2.18241700 | 1.68422200  |
| C | 2.98728300  | -1.28905400 | 2.56176800  |
| C | 3.60868600  | -0.98007400 | 3.77921300  |
| C | 4.83676000  | -1.55066900 | 4.11490800  |
| C | 5.45618500  | -2.43785100 | 3.23371000  |
| H | 5.32237700  | -3.43775300 | 1.32699500  |
| H | 3.14366800  | -2.43598500 | 0.73946500  |
| H | 3.12214600  | -0.29764000 | 4.47204400  |
| H | 5.30425700  | -1.30769000 | 5.06446300  |
| H | 6.41039100  | -2.88616700 | 3.49445600  |
| C | 1.66421800  | -0.65560200 | 2.20942400  |
| H | 1.14356000  | -0.30872200 | 3.10470900  |
| H | 1.01086300  | -1.36136100 | 1.68978200  |
| N | 1.79763000  | 0.54202400  | 1.30974000  |
| H | 2.65659300  | 1.05728700  | 1.50911900  |
| H | 1.80275100  | 0.27583800  | 0.26736500  |
| C | 5.38098700  | -2.55433800 | -2.16394200 |
| C | 4.21215300  | -1.85182100 | -2.45885700 |

|   |            |             |             |
|---|------------|-------------|-------------|
| C | 4.03008800 | -0.53726900 | -2.00725600 |
| C | 5.04917500 | 0.05974100  | -1.25399400 |
| C | 6.22166100 | -0.63826200 | -0.96058000 |
| C | 6.39129800 | -1.94675800 | -1.41530300 |
| H | 5.50921000 | -3.56919400 | -2.52980200 |
| H | 3.43550900 | -2.32497300 | -3.05476000 |
| H | 4.93033400 | 1.08404500  | -0.90977900 |
| H | 7.00528100 | -0.15751300 | -0.38213000 |
| H | 7.30776800 | -2.48689700 | -1.19574000 |
| C | 2.76117500 | 0.21739000  | -2.33926300 |
| H | 2.48700200 | 0.02504900  | -3.38608300 |
| H | 2.93658300 | 1.29252400  | -2.24692000 |
| N | 1.64042100 | -0.12533100 | -1.42652300 |
| H | 0.81307100 | 0.40161900  | -1.74024200 |
| H | 1.40276100 | -1.11063100 | -1.54748000 |

**Int5F**

|   |             |            |             |
|---|-------------|------------|-------------|
| C | 3.18165000  | 6.25155700 | 0.28040300  |
| C | 2.76854400  | 5.03146600 | -0.25826100 |
| C | 1.41415100  | 4.77912600 | -0.50198600 |
| C | 0.47587800  | 5.77415500 | -0.19083600 |
| C | 0.88507300  | 6.99022800 | 0.35369300  |
| C | 2.24037800  | 7.23302200 | 0.58970300  |
| H | 4.23731200  | 6.43159700 | 0.46173200  |
| H | 3.50561200  | 4.26806700 | -0.49476800 |
| H | -0.57891600 | 5.59141700 | -0.37787900 |
| H | 0.14671200  | 7.75089800 | 0.59009400  |
| H | 2.55904000  | 8.18153300 | 1.01183000  |
| C | 0.97276800  | 3.46801900 | -1.11524300 |
| H | 1.83772600  | 2.80813900 | -1.26739300 |
| H | 0.52646300  | 3.61708800 | -2.10463600 |
| N | -0.02145100 | 2.80613500 | -0.27769000 |
| H | -0.02700700 | 3.04722400 | 0.70753700  |
| C | -0.82477900 | 1.79538800 | -0.66623100 |
| S | -0.80453000 | 1.23453700 | -2.26624900 |
| C | -1.75034000 | 1.25756300 | 0.37179900  |
| C | -1.44389600 | 1.27106700 | 1.70751100  |
| O | -0.25204600 | 1.65919100 | 2.22412700  |
| C | -2.40013100 | 0.86919200 | 2.79567400  |

|   |             |             |             |
|---|-------------|-------------|-------------|
| H | -2.06346400 | -0.06521400 | 3.26119700  |
| H | -2.37514300 | 1.63593500  | 3.57736800  |
| H | -3.42187200 | 0.74782000  | 2.44198000  |
| H | 0.56306500  | 1.23123700  | 1.75534000  |
| C | -3.08733800 | 0.72638200  | -0.08144200 |
| C | -4.22425500 | 1.68581000  | -0.04465300 |
| C | -5.47227800 | 1.35195500  | 0.51753400  |
| C | -4.06574200 | 2.99854200  | -0.53136100 |
| C | -6.52033700 | 2.27242100  | 0.55925400  |
| H | -5.61829900 | 0.36222700  | 0.94023700  |
| C | -5.10938900 | 3.91941700  | -0.48406700 |
| H | -3.11627200 | 3.28995700  | -0.96829600 |
| C | -6.34624300 | 3.56195000  | 0.05817000  |
| H | -7.47044600 | 1.98140800  | 0.99910200  |
| H | -4.95838500 | 4.92071000  | -0.87865300 |
| H | -7.15911600 | 4.28129400  | 0.09537300  |
| C | -3.19254700 | -0.56728600 | -0.50140300 |
| C | -4.42058600 | -1.13978500 | -1.17482000 |
| H | -4.14727500 | -1.42347500 | -2.19996500 |
| C | -5.06826500 | -2.33901300 | -0.49702200 |
| C | -4.97760700 | -2.55215300 | 0.88487700  |
| C | -5.82294600 | -3.24158900 | -1.25983000 |
| C | -5.62971700 | -3.63015900 | 1.48658200  |
| H | -4.37930700 | -1.87705100 | 1.48869300  |
| C | -6.47706200 | -4.31847100 | -0.66182000 |
| H | -5.90132300 | -3.09458600 | -2.33471400 |
| C | -6.38329100 | -4.51659100 | 0.71684700  |
| H | -5.54521400 | -3.77815600 | 2.55971200  |
| H | -7.05691200 | -5.00425400 | -1.27325200 |
| H | -6.88879900 | -5.35615900 | 1.18507700  |
| C | 1.49516200  | -4.36936300 | -1.51650500 |
| C | 0.41314400  | -3.56375800 | -1.88208800 |
| C | -0.61284600 | -3.28296900 | -0.97127000 |
| C | -0.53165800 | -3.82238000 | 0.32062200  |
| C | 0.54945200  | -4.62357600 | 0.68978300  |
| C | 1.56672200  | -4.90072700 | -0.22759600 |
| H | 2.27948500  | -4.58091100 | -2.23778400 |
| H | 0.36017500  | -3.15231000 | -2.88709400 |
| H | -1.32562600 | -3.60772600 | 1.02931900  |

|   |             |             |             |
|---|-------------|-------------|-------------|
| H | 0.59547900  | -5.03848300 | 1.69276100  |
| H | 2.40467300  | -5.52964100 | 0.05865800  |
| C | -1.79957500 | -2.43626500 | -1.38558500 |
| H | -2.66825300 | -3.08838300 | -1.53321700 |
| H | -1.58271300 | -1.95137600 | -2.34961100 |
| N | -2.12466200 | -1.45757100 | -0.34669100 |
| H | -5.16123400 | -0.34460100 | -1.28438800 |
| H | -1.29259400 | -0.96991300 | -0.03362500 |
| C | 5.11576200  | -2.82976300 | 2.34300600  |
| C | 3.85201900  | -2.33519000 | 2.01652100  |
| C | 3.27799600  | -1.29554800 | 2.75986100  |
| C | 3.99661700  | -0.76666600 | 3.84144700  |
| C | 5.26135900  | -1.25608200 | 4.16840300  |
| C | 5.82444000  | -2.29024600 | 3.41833200  |
| H | 5.54500300  | -3.63873200 | 1.75910100  |
| H | 3.30231700  | -2.76267000 | 1.18233000  |
| H | 3.55590800  | 0.02954500  | 4.43758800  |
| H | 5.80233300  | -0.83761200 | 5.01228900  |
| H | 6.80569900  | -2.67860100 | 3.67527400  |
| C | 1.92079400  | -0.72773200 | 2.39779000  |
| H | 1.40053200  | -0.40754800 | 3.30720700  |
| H | 1.30132600  | -1.49731600 | 1.92672600  |
| N | 1.95189600  | 0.43530100  | 1.47422300  |
| H | 2.69049500  | 1.07399300  | 1.76764900  |
| H | 2.18196600  | 0.14024300  | 0.51160400  |
| C | 6.71991500  | -1.49938000 | -3.25179700 |
| C | 5.42753000  | -1.00005300 | -3.42025200 |
| C | 4.66938000  | -0.57782500 | -2.32103400 |
| C | 5.23220600  | -0.67949900 | -1.04233900 |
| C | 6.52094200  | -1.18449200 | -0.86924200 |
| C | 7.27137100  | -1.59320200 | -1.97355400 |
| H | 7.29140900  | -1.82112100 | -4.11792100 |
| H | 5.00071100  | -0.93680100 | -4.41857800 |
| H | 4.65114600  | -0.37184100 | -0.17993600 |
| H | 6.93466600  | -1.26159800 | 0.13213600  |
| H | 8.27521100  | -1.98570300 | -1.83847800 |
| C | 3.28689100  | 0.00761900  | -2.53190500 |
| H | 2.94874600  | -0.24831700 | -3.54810700 |
| H | 3.35071900  | 1.10423100  | -2.50678500 |

|   |            |             |             |
|---|------------|-------------|-------------|
| N | 2.32209600 | -0.39275400 | -1.49314300 |
| H | 1.41605200 | 0.02330700  | -1.72452700 |
| H | 2.18598800 | -1.40237800 | -1.53222100 |

**TS5F**

|   |             |             |             |
|---|-------------|-------------|-------------|
| C | -7.22765800 | -2.98565900 | -3.04738400 |
| C | -6.60764200 | -2.87549600 | -1.80023600 |
| C | -6.13449200 | -1.64199200 | -1.33954500 |
| C | -6.29362000 | -0.51526000 | -2.16062800 |
| C | -6.90902000 | -0.62104900 | -3.40650700 |
| C | -7.37858600 | -1.85888100 | -3.85461700 |
| H | -7.58975900 | -3.95203100 | -3.38693300 |
| H | -6.49116700 | -3.75672200 | -1.17427200 |
| H | -5.93317700 | 0.44829700  | -1.81102600 |
| H | -7.02837600 | 0.26243300  | -4.02769400 |
| H | -7.85990700 | -1.94166200 | -4.82486300 |
| C | -5.47170200 | -1.52101200 | 0.01649000  |
| H | -5.52891800 | -2.47831200 | 0.55391500  |
| H | -5.98933000 | -0.79384500 | 0.64993200  |
| N | -4.09086700 | -1.07455300 | -0.12216200 |
| H | -3.58717800 | -1.50617000 | -0.88494200 |
| C | -3.30927500 | -0.64052800 | 0.93460400  |
| S | -3.97351700 | -0.52581800 | 2.49623800  |
| C | -1.95887900 | -0.30484800 | 0.60527400  |
| C | -1.55324400 | 0.35378000  | -0.64619800 |
| O | -0.56106700 | -0.19887800 | -1.40264200 |
| C | -2.53000100 | 1.06131200  | -1.56053700 |
| H | -1.98688000 | 1.73562000  | -2.22550800 |
| H | -3.03869800 | 0.32453400  | -2.18445500 |
| H | -3.28878100 | 1.60982000  | -1.00299200 |
| H | -0.06713700 | -0.94552700 | -0.92266000 |
| C | -0.91044800 | -0.12861000 | 1.59739800  |
| C | -0.67811400 | -1.10269100 | 2.69535000  |
| C | -0.25291200 | -0.72171000 | 3.97808400  |
| C | -0.85083200 | -2.47475200 | 2.43902600  |
| C | 0.01261400  | -1.67602700 | 4.95987600  |
| H | -0.16115600 | 0.33032300  | 4.22226400  |
| C | -0.58508000 | -3.42914500 | 3.41837400  |
| H | -1.21528200 | -2.77497800 | 1.46245600  |

|   |             |             |             |
|---|-------------|-------------|-------------|
| C | -0.14594900 | -3.03417200 | 4.68440200  |
| H | 0.33066800  | -1.35423400 | 5.94746500  |
| H | -0.73730700 | -4.48243800 | 3.19866900  |
| H | 0.05400400  | -3.77619400 | 5.45193300  |
| C | -0.08529200 | 0.93610400  | 1.34593200  |
| C | 1.28543000  | 1.24228100  | 1.88608100  |
| H | 2.01898300  | 1.19209700  | 1.06294700  |
| C | 1.50702400  | 2.56708300  | 2.61282900  |
| C | 0.60430900  | 3.04116200  | 3.57655300  |
| C | 2.66528600  | 3.31473400  | 2.36495400  |
| C | 0.85739100  | 4.22321600  | 4.27321700  |
| H | -0.31164200 | 2.48882800  | 3.76664800  |
| C | 2.92137300  | 4.49909300  | 3.05946300  |
| H | 3.38107500  | 2.95935900  | 1.62674100  |
| C | 2.01765400  | 4.95716100  | 4.01780000  |
| H | 0.14449900  | 4.57212400  | 5.01484100  |
| H | 3.82630700  | 5.06236900  | 2.84958900  |
| H | 2.21264100  | 5.87844300  | 4.55859500  |
| C | 0.43760400  | 5.50706600  | -1.89771300 |
| C | 0.26266100  | 4.55373200  | -0.89549900 |
| C | -1.01344200 | 4.04943100  | -0.59992300 |
| C | -2.11113600 | 4.54073500  | -1.31612100 |
| C | -1.93961900 | 5.50150300  | -2.31427100 |
| C | -0.66435400 | 5.98191500  | -2.61216400 |
| H | 1.43138400  | 5.88960300  | -2.11161000 |
| H | 1.12038200  | 4.21613400  | -0.31773500 |
| H | -3.10705000 | 4.17226000  | -1.08790800 |
| H | -2.80302000 | 5.87318300  | -2.85816100 |
| H | -0.53001200 | 6.72796700  | -3.38975100 |
| C | -1.17880100 | 3.02511700  | 0.49997300  |
| H | -2.23140100 | 2.82054600  | 0.71407400  |
| H | -0.72827900 | 3.39719800  | 1.42245900  |
| N | -0.54390200 | 1.70308300  | 0.17820400  |
| H | 1.55547500  | 0.42685400  | 2.56675600  |
| H | 0.19437000  | 1.82390500  | -0.51639300 |
| C | 4.68331000  | -4.99077800 | -0.93948400 |
| C | 3.47703300  | -4.38655300 | -1.29862000 |
| C | 2.47504200  | -4.16282100 | -0.34558300 |
| C | 2.70644700  | -4.56099200 | 0.97868500  |

|   |            |             |             |
|---|------------|-------------|-------------|
| C | 3.91096700 | -5.16362400 | 1.34123500  |
| C | 4.90311400 | -5.38019100 | 0.38258600  |
| H | 5.44699100 | -5.16261100 | -1.69280100 |
| H | 3.30946700 | -4.08806000 | -2.33082600 |
| H | 1.93715900 | -4.39525600 | 1.72985500  |
| H | 4.07339900 | -5.46909100 | 2.37091400  |
| H | 5.83927500 | -5.85368900 | 0.66366100  |
| C | 1.18521700 | -3.45807300 | -0.72036200 |
| H | 0.34513200 | -3.89973600 | -0.17512200 |
| H | 0.98102300 | -3.58992000 | -1.78794400 |
| N | 1.18787600 | -2.00588000 | -0.44460200 |
| H | 1.38104800 | -1.84968300 | 0.54299300  |
| H | 1.92931900 | -1.55116200 | -0.98968600 |
| C | 7.01892400 | 0.90015200  | -3.56666300 |
| C | 5.67120100 | 1.25626700  | -3.49739200 |
| C | 4.76258100 | 0.49016300  | -2.75761600 |
| C | 5.23057300 | -0.65237500 | -2.09483100 |
| C | 6.57587700 | -1.01334300 | -2.16684600 |
| C | 7.47567200 | -0.23754300 | -2.90065700 |
| H | 7.70847800 | 1.50661700  | -4.14699200 |
| H | 5.31960800 | 2.13909800  | -4.02655600 |
| H | 4.53405200 | -1.26342900 | -1.53042800 |
| H | 6.91982600 | -1.90373800 | -1.64804300 |
| H | 8.52297400 | -0.51996000 | -2.95638300 |
| C | 3.30915700 | 0.91487000  | -2.66090400 |
| H | 3.10283400 | 1.64669500  | -3.45882500 |
| H | 3.15026900 | 1.44871900  | -1.71258800 |
| N | 2.39283200 | -0.23309200 | -2.66686400 |
| H | 1.42660400 | 0.07876900  | -2.57294300 |
| H | 2.46227800 | -0.71866600 | -3.55869000 |

**Int6F**

|   |             |             |             |
|---|-------------|-------------|-------------|
| C | -5.89804300 | -3.37014000 | -3.52293700 |
| C | -5.51394400 | -3.17724300 | -2.19351700 |
| C | -5.47538000 | -1.89473500 | -1.63582100 |
| C | -5.83195900 | -0.80307600 | -2.44229200 |
| C | -6.21341400 | -0.99050700 | -3.76939300 |
| C | -6.24696900 | -2.27701600 | -4.31493000 |
| H | -5.92340400 | -4.37398400 | -3.93773500 |



|   |             |             |             |
|---|-------------|-------------|-------------|
| H | -5.24358000 | -4.03251300 | -1.57897900 |
| H | -5.81359200 | 0.19662700  | -2.01638700 |
| H | -6.49138100 | -0.13464100 | -4.37834700 |
| H | -6.54650500 | -2.42417900 | -5.34863600 |
| C | -5.06218600 | -1.68429300 | -0.19454800 |
| H | -4.98491400 | -2.65263300 | 0.32116800  |
| H | -5.81234300 | -1.11079800 | 0.35828100  |
| N | -3.81148400 | -0.94121900 | -0.11653600 |
| H | -3.09716600 | -1.23441700 | -0.77088400 |
| C | -3.35518500 | -0.30390800 | 1.02549800  |
| S | -4.30199200 | -0.29227700 | 2.43641700  |
| C | -2.08227000 | 0.33198600  | 0.89445200  |
| C | -1.52296300 | 0.84716300  | -0.41306500 |
| O | -0.72949500 | -0.06168700 | -1.12858000 |
| C | -2.46264900 | 1.50155400  | -1.41637400 |
| H | -1.90275400 | 1.91493100  | -2.25738700 |
| H | -3.13867500 | 0.73800100  | -1.79707200 |
| H | -3.07552100 | 2.27767400  | -0.95797300 |
| H | -0.34464100 | -0.76943600 | -0.52304700 |
| C | -1.10831700 | 0.56676000  | 1.90580400  |
| C | -1.03423300 | -0.12644200 | 3.21749300  |
| C | -0.78993500 | 0.58120300  | 4.40248300  |
| C | -1.13999800 | -1.52530500 | 3.28484700  |
| C | -0.64758500 | -0.08725600 | 5.61933900  |
| H | -0.74490000 | 1.66489500  | 4.36979100  |
| C | -0.99199100 | -2.19403600 | 4.49688800  |
| H | -1.36134100 | -2.07663000 | 2.37746000  |
| C | -0.74239400 | -1.47733200 | 5.67043100  |
| H | -0.47058700 | 0.48095700  | 6.52814400  |
| H | -1.08833600 | -3.27586300 | 4.53071500  |
| H | -0.63485900 | -1.99876000 | 6.61718000  |
| C | -0.09807100 | 1.41601600  | 1.49699900  |
| C | 1.34280100  | 1.48708400  | 1.90693300  |
| H | 1.97887300  | 0.94749400  | 1.17912400  |
| C | 1.96520100  | 2.86642500  | 2.10930800  |
| C | 1.41559900  | 3.78753200  | 3.01375500  |
| C | 3.12656400  | 3.23042100  | 1.41734300  |
| C | 2.00961700  | 5.03222400  | 3.21789200  |
| H | 0.51222500  | 3.52225200  | 3.55573500  |

|   |             |             |             |
|---|-------------|-------------|-------------|
| C | 3.72491500  | 4.47790400  | 1.61693400  |
| H | 3.57778800  | 2.52209000  | 0.72523300  |
| C | 3.16726100  | 5.38343800  | 2.51812700  |
| H | 1.57011200  | 5.72914900  | 3.92593100  |
| H | 4.62660700  | 4.73781100  | 1.06953000  |
| H | 3.62881000  | 6.35357000  | 2.67635300  |
| C | 0.86668200  | 5.08144500  | -2.73163300 |
| C | 0.64169200  | 4.33750000  | -1.57393300 |
| C | -0.65726100 | 4.17438300  | -1.06910200 |
| C | -1.71954000 | 4.80040200  | -1.73169500 |
| C | -1.49474000 | 5.55653200  | -2.88259900 |
| C | -0.20234600 | 5.69142800  | -3.39051700 |
| H | 1.87803000  | 5.19809900  | -3.10968000 |
| H | 1.48760400  | 3.90773100  | -1.04153100 |
| H | -2.72898300 | 4.69802700  | -1.34391400 |
| H | -2.33029800 | 6.03700300  | -3.38271600 |
| H | -0.02743200 | 6.27610800  | -4.28864600 |
| C | -0.87621500 | 3.39789200  | 0.20964500  |
| H | -1.91625800 | 3.40627300  | 0.53685300  |
| H | -0.27432200 | 3.82750000  | 1.01086600  |
| N | -0.45968000 | 1.93415600  | 0.14619300  |
| H | 1.42450500  | 0.92338500  | 2.84289600  |
| H | 0.32062200  | 1.84523100  | -0.51160600 |
| C | 3.63303300  | -5.56724400 | -0.04189400 |
| C | 2.52445400  | -4.81042300 | -0.42458600 |
| C | 1.64438100  | -4.29089200 | 0.53400800  |
| C | 1.89818300  | -4.54987000 | 1.88794200  |
| C | 3.00573800  | -5.30500700 | 2.27449000  |
| C | 3.87638500  | -5.81604900 | 1.31001400  |
| H | 4.30104800  | -5.96807500 | -0.79905400 |
| H | 2.33767200  | -4.62152000 | -1.47910400 |
| H | 1.22308300  | -4.15496000 | 2.64416600  |
| H | 3.18604500  | -5.49918700 | 3.32791000  |
| H | 4.73587800  | -6.40832800 | 1.61003500  |
| C | 0.47218300  | -3.42004500 | 0.12369500  |
| H | -0.37258800 | -3.58790700 | 0.79952600  |
| H | 0.13565400  | -3.69173800 | -0.88224400 |
| N | 0.76785300  | -1.97189400 | 0.11405400  |
| H | 1.10962100  | -1.69147400 | 1.03151000  |

|   |            |             |             |
|---|------------|-------------|-------------|
| H | 1.50689900 | -1.77642000 | -0.57099300 |
| C | 6.68067100 | -0.79087700 | -3.81627400 |
| C | 5.42307500 | -0.18956100 | -3.74515400 |
| C | 4.46181200 | -0.63994900 | -2.83263300 |
| C | 4.78260700 | -1.71776400 | -1.99646300 |
| C | 6.03669300 | -2.32369600 | -2.06903800 |
| C | 6.99134000 | -1.86140100 | -2.97733000 |
| H | 7.41292700 | -0.42815400 | -4.53203800 |
| H | 5.18395500 | 0.63834600  | -4.40880500 |
| H | 4.04146800 | -2.08618800 | -1.29499400 |
| H | 6.26634300 | -3.15927800 | -1.41380000 |
| H | 7.96741700 | -2.33449300 | -3.03361500 |
| C | 3.11400600 | 0.05109400  | -2.74036400 |
| H | 2.97179300 | 0.66677200  | -3.64356100 |
| H | 3.12512500 | 0.75368200  | -1.89412200 |
| N | 2.01797800 | -0.89520300 | -2.49681300 |
| H | 1.13138100 | -0.40029300 | -2.39900300 |
| H | 1.92423500 | -1.52060000 | -3.29424300 |

**TS6F**

|   |             |             |            |
|---|-------------|-------------|------------|
| C | -4.47187600 | -2.44078800 | 3.30990500 |
| C | -3.31690700 | -3.02061400 | 2.77963900 |
| C | -2.06110000 | -2.75879600 | 3.34021500 |
| C | -1.98557600 | -1.90696900 | 4.45169100 |
| C | -3.13583600 | -1.32630200 | 4.98357500 |
| C | -4.38307700 | -1.59069100 | 4.41193700 |
| H | -5.43783900 | -2.65577900 | 2.86242800 |
| H | -3.39132700 | -3.68945000 | 1.92597000 |
| H | -1.01780700 | -1.70779100 | 4.90514600 |
| H | -3.06125000 | -0.67255900 | 5.84791800 |
| H | -5.27981000 | -1.14049500 | 4.82762600 |
| C | -0.80708700 | -3.36987800 | 2.75507900 |
| H | -1.05721600 | -4.22122600 | 2.10833800 |
| H | -0.15034900 | -3.76572200 | 3.53652400 |
| N | -0.04780400 | -2.37368500 | 2.00458800 |
| H | -0.56408200 | -1.59953500 | 1.60215800 |
| C | 1.24717100  | -2.52525900 | 1.60723700 |
| S | 2.12588800  | -3.92393100 | 1.92204900 |
| C | 1.78551200  | -1.36253000 | 0.91115200 |

|   |             |             |             |
|---|-------------|-------------|-------------|
| C | 1.50351300  | -0.03684200 | 1.25966000  |
| O | 0.00000900  | 0.74561600  | 0.32717200  |
| C | 1.19513800  | 0.47526300  | 2.63685500  |
| H | 0.71233100  | 1.44970600  | 2.60261200  |
| H | 0.52880200  | -0.22811400 | 3.13407600  |
| H | 2.10915700  | 0.54280800  | 3.23828600  |
| H | -0.32747800 | 0.06859900  | -0.30263800 |
| C | 2.61767700  | -1.36455200 | -0.28349800 |
| C | 2.88693400  | -2.54368200 | -1.14209400 |
| C | 4.18634300  | -2.90181100 | -1.52585400 |
| C | 1.80655300  | -3.29246300 | -1.63688200 |
| C | 4.40237300  | -3.98483800 | -2.37903100 |
| H | 5.03262400  | -2.34416600 | -1.13929500 |
| C | 2.02324000  | -4.36804400 | -2.49346600 |
| H | 0.79660000  | -3.01364400 | -1.35262000 |
| C | 3.32273000  | -4.72088600 | -2.86525900 |
| H | 5.41684700  | -4.25475000 | -2.65778700 |
| H | 1.17680100  | -4.93556900 | -2.86938900 |
| H | 3.49097200  | -5.56528500 | -3.52732300 |
| C | 2.98572000  | -0.09729100 | -0.61620500 |
| C | 3.60444100  | 0.44769400  | -1.86640400 |
| H | 2.94892900  | 1.21254500  | -2.30929500 |
| C | 5.01981000  | 1.02238100  | -1.78229100 |
| C | 5.98597700  | 0.48763900  | -0.91925600 |
| C | 5.39071300  | 2.08028400  | -2.62275400 |
| C | 7.28739700  | 0.99123500  | -0.90338100 |
| H | 5.70942500  | -0.31862100 | -0.24595500 |
| C | 6.69134300  | 2.58578900  | -2.60999200 |
| H | 4.65340100  | 2.51034500  | -3.29694800 |
| C | 7.64600500  | 2.04130700  | -1.75000500 |
| H | 8.02112500  | 0.56243100  | -0.22667300 |
| H | 6.95661600  | 3.40741900  | -3.26921600 |
| H | 8.65817900  | 2.43444600  | -1.73646600 |
| C | 1.17493500  | 5.02080400  | 1.22666400  |
| C | 1.72255800  | 3.83620600  | 0.73607800  |
| C | 2.62027100  | 3.09167600  | 1.51302700  |
| C | 2.96924900  | 3.56776400  | 2.78200000  |
| C | 2.43114600  | 4.75915800  | 3.26977200  |
| C | 1.52895400  | 5.48700500  | 2.49422900  |

|   |             |             |             |
|---|-------------|-------------|-------------|
| H | 0.47498100  | 5.58203500  | 0.61503500  |
| H | 1.43704400  | 3.49182300  | -0.25373900 |
| H | 3.66722900  | 3.00192800  | 3.39353800  |
| H | 2.71311300  | 5.11319700  | 4.25683000  |
| H | 1.10400100  | 6.41136400  | 2.87365900  |
| C | 3.28599400  | 1.84448100  | 0.97280500  |
| H | 3.85798700  | 1.32749400  | 1.74666300  |
| H | 3.98879800  | 2.11645600  | 0.18335200  |
| N | 2.35431100  | 0.83643900  | 0.35185500  |
| H | 3.61693000  | -0.38080200 | -2.58492700 |
| H | 1.45555800  | 1.25635500  | -0.08325500 |
| C | -6.21407700 | -1.12239700 | -2.26174600 |
| C | -4.98705700 | -1.06276700 | -1.60306500 |
| C | -4.00765100 | -2.04465700 | -1.82032400 |
| C | -4.29199200 | -3.08557800 | -2.71106700 |
| C | -5.52133200 | -3.14967900 | -3.37208700 |
| C | -6.48566300 | -2.16753000 | -3.14938100 |
| H | -6.96082400 | -0.35441800 | -2.07961500 |
| H | -4.77943300 | -0.24342900 | -0.91888200 |
| H | -3.54432300 | -3.85539900 | -2.88866100 |
| H | -5.72319900 | -3.96612400 | -4.05990400 |
| H | -7.44238800 | -2.21465200 | -3.66155000 |
| C | -2.66513600 | -1.96088600 | -1.11239600 |
| H | -2.09178900 | -2.87340600 | -1.31333000 |
| H | -2.82598000 | -1.92524500 | -0.02827400 |
| N | -1.83251500 | -0.79704400 | -1.46243800 |
| H | -1.71711600 | -0.75978500 | -2.47371400 |
| H | -2.32154500 | 0.06144200  | -1.18663400 |
| C | -5.63621400 | 5.37693500  | -1.27285200 |
| C | -4.45573900 | 4.91318000  | -0.68723700 |
| C | -3.92316700 | 3.66574200  | -1.02989400 |
| C | -4.60616800 | 2.88328000  | -1.97210800 |
| C | -5.78518800 | 3.34137100  | -2.55783200 |
| C | -6.30493900 | 4.59139600  | -2.21085000 |
| H | -6.03416000 | 6.34789700  | -0.99113000 |
| H | -3.94196700 | 5.52780600  | 0.04854200  |
| H | -4.20987400 | 1.90793200  | -2.23570800 |
| H | -6.29931300 | 2.72226000  | -3.28803300 |
| H | -7.22438400 | 4.94729600  | -2.66688300 |

|   |             |            |             |
|---|-------------|------------|-------------|
| C | -2.62764200 | 3.17793600 | -0.40981500 |
| H | -2.31329700 | 3.90213200 | 0.36108300  |
| H | -1.83503300 | 3.18515700 | -1.17039200 |
| N | -2.72110500 | 1.79981600 | 0.08425000  |
| H | -1.79248700 | 1.49440700 | 0.40570100  |
| H | -3.35730200 | 1.76320800 | 0.87783700  |

**Int7F**

|   |             |             |             |
|---|-------------|-------------|-------------|
| C | 3.06358100  | -3.34094200 | -1.46304900 |
| C | 1.94521300  | -2.77200100 | -2.07266800 |
| C | 2.08501200  | -1.66505000 | -2.92344600 |
| C | 3.36578500  | -1.15001200 | -3.15349500 |
| C | 4.48861700  | -1.72111100 | -2.54623100 |
| C | 4.33875100  | -2.81660500 | -1.69499000 |
| H | 2.94193900  | -4.20222600 | -0.81225300 |
| H | 0.95693700  | -3.19067800 | -1.90553700 |
| H | 3.48688200  | -0.29904500 | -3.81993800 |
| H | 5.47628000  | -1.31180500 | -2.74002400 |
| H | 5.20819100  | -3.26476100 | -1.22307100 |
| C | 0.87261100  | -1.05905100 | -3.60517900 |
| H | 0.40193800  | -1.79267600 | -4.26719100 |
| H | 1.18465900  | -0.19846200 | -4.20845200 |
| N | -0.15857400 | -0.61747800 | -2.67322700 |
| H | 0.07555100  | 0.17859600  | -2.06539400 |
| C | -1.36434500 | -1.20336400 | -2.51515000 |
| S | -1.86736000 | -2.59822600 | -3.30292300 |
| C | -2.25591800 | -0.46409100 | -1.58714900 |
| C | -2.69723000 | 0.83159300  | -1.80204500 |
| O | 0.70138900  | 1.57504700  | -0.98117100 |
| C | -2.45305700 | 1.76106400  | -2.94881500 |
| H | -2.03316100 | 2.72203500  | -2.62784800 |
| H | -1.75125800 | 1.30717700  | -3.64908900 |
| H | -3.37737000 | 1.97629000  | -3.49996200 |
| H | 0.95298800  | 1.22476300  | -0.07854100 |
| C | -2.88838200 | -0.95113400 | -0.38775500 |
| C | -2.66090400 | -2.25429500 | 0.27039500  |
| C | -3.72464300 | -3.03073200 | 0.75953700  |
| C | -1.35348300 | -2.74023800 | 0.44898500  |
| C | -3.48859000 | -4.23866100 | 1.41736300  |

|   |             |             |             |
|---|-------------|-------------|-------------|
| H | -4.74584100 | -2.69753500 | 0.60312600  |
| C | -1.11799100 | -3.94947500 | 1.09914600  |
| H | -0.51805700 | -2.15657000 | 0.07602700  |
| C | -2.18542800 | -4.70373100 | 1.59129600  |
| H | -4.32875200 | -4.82244900 | 1.78299000  |
| H | -0.09803900 | -4.30216800 | 1.22554700  |
| H | -2.00267500 | -5.64632100 | 2.09899800  |
| C | -3.68261000 | 0.07889300  | 0.09526400  |
| C | -4.49698900 | 0.16177700  | 1.35240000  |
| H | -4.20194400 | 1.04056300  | 1.94206300  |
| C | -6.01328500 | 0.18724200  | 1.17121900  |
| C | -6.63692500 | -0.43266400 | 0.08036200  |
| C | -6.81787500 | 0.81237000  | 2.13400600  |
| C | -8.02807900 | -0.43741100 | -0.03679600 |
| H | -6.02763400 | -0.90636800 | -0.68396100 |
| C | -8.20803800 | 0.80944000  | 2.01864600  |
| H | -6.34929400 | 1.30310600  | 2.98425400  |
| C | -8.81899300 | 0.18201400  | 0.93147100  |
| H | -8.49261900 | -0.92440700 | -0.88952100 |
| H | -8.81309900 | 1.29994500  | 2.77603600  |
| H | -9.90102200 | 0.18014300  | 0.83810800  |
| C | -1.12167900 | 3.96202700  | 1.30877800  |
| C | -1.99796900 | 3.03464200  | 0.73790500  |
| C | -3.13861400 | 3.46608300  | 0.04919500  |
| C | -3.38432800 | 4.84059600  | -0.05496800 |
| C | -2.51303700 | 5.76605200  | 0.51952600  |
| C | -1.37620300 | 5.32973100  | 1.20250300  |
| H | -0.24076500 | 3.61070600  | 1.83867600  |
| H | -1.79515100 | 1.97144100  | 0.82468900  |
| H | -4.26284800 | 5.19005400  | -0.59251200 |
| H | -2.71818600 | 6.82858300  | 0.42680400  |
| H | -0.69461400 | 6.04966000  | 1.64531500  |
| C | -4.12389800 | 2.47781700  | -0.56434200 |
| H | -4.48744300 | 2.86987500  | -1.51968000 |
| H | -5.00500200 | 2.37598800  | 0.07552200  |
| N | -3.57373400 | 1.15013800  | -0.78175300 |
| H | -4.22931400 | -0.70657300 | 1.96484200  |
| H | 0.05124800  | 2.26935300  | -0.81123800 |
| C | 5.22575900  | -1.64343600 | 3.29486900  |

|   |            |             |             |
|---|------------|-------------|-------------|
| C | 4.26204800 | -1.31987900 | 2.33992400  |
| C | 2.91804800 | -1.15382500 | 2.70522200  |
| C | 2.56328800 | -1.32777800 | 4.04875700  |
| C | 3.52516600 | -1.65153000 | 5.00766000  |
| C | 4.85987900 | -1.80865100 | 4.63294600  |
| H | 6.26113100 | -1.77454500 | 2.99288600  |
| H | 4.55124100 | -1.19884800 | 1.29898300  |
| H | 1.52260800 | -1.21667900 | 4.34545900  |
| H | 3.23081600 | -1.78651200 | 6.04463100  |
| H | 5.60918800 | -2.06448500 | 5.37641800  |
| C | 1.88260300 | -0.75260400 | 1.67202700  |
| H | 0.88533000 | -1.06021300 | 2.00348600  |
| H | 2.07793800 | -1.26896900 | 0.72643800  |
| N | 1.84413400 | 0.69692300  | 1.37502900  |
| H | 1.72542500 | 1.21490800  | 2.24413600  |
| H | 2.74213400 | 0.99342200  | 0.97098600  |
| C | 8.61516800 | 2.06458200  | -0.83517600 |
| C | 7.35079100 | 2.41748900  | -1.31178200 |
| C | 6.20679200 | 2.22017700  | -0.53035900 |
| C | 6.35459500 | 1.65037000  | 0.74195000  |
| C | 7.61499900 | 1.29348400  | 1.21940900  |
| C | 8.75101700 | 1.50055600  | 0.43316300  |
| H | 9.49087500 | 2.22461800  | -1.45788700 |
| H | 7.25105400 | 2.85024000  | -2.30460400 |
| H | 5.47306800 | 1.47838300  | 1.35065000  |
| H | 7.70966000 | 0.85376600  | 2.20854800  |
| H | 9.73262800 | 1.22171900  | 0.80539800  |
| C | 4.84068200 | 2.63571200  | -1.04343700 |
| H | 4.92888500 | 2.88132900  | -2.11478800 |
| H | 4.53401500 | 3.56530800  | -0.54437800 |
| N | 3.81264000 | 1.62806900  | -0.75648900 |
| H | 2.89585800 | 1.93660700  | -1.08366100 |
| H | 4.01953300 | 0.76876500  | -1.26283600 |
